# Supplementary material for: Snf1/AMPK fine-tunes TORC1 signaling in response to glucose starvation
Source: PubMed Central journal article supplement (PMC9937656; doi:10.7554/elife.84319), 2023-02-07

# Figure 1A

Loading order:

| 2NM-PP1 | WT  |    | <i>snf1Δ</i> |    | <i>snf1<sup>as</sup></i> |    |
|---------|-----|----|--------------|----|--------------------------|----|
|         | Exp | -C | Exp          | -C | Exp                      | -C |
|         | -   | +  | -            | +  | -                        | +  |

Anti-Sch9-pThr<sup>737</sup>

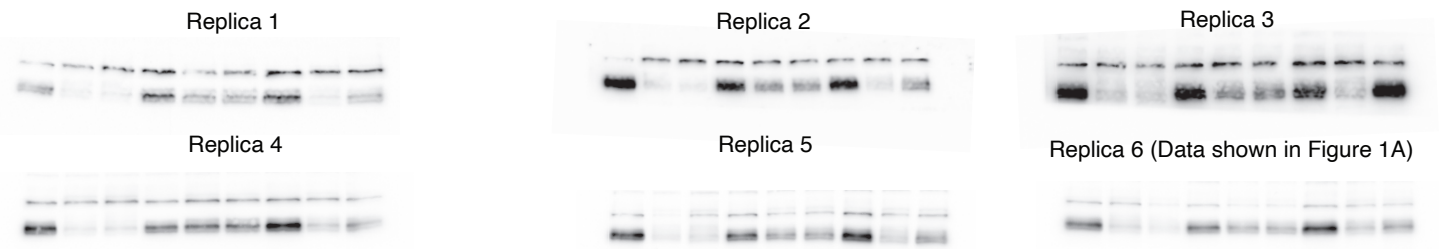

Anti-Sch9

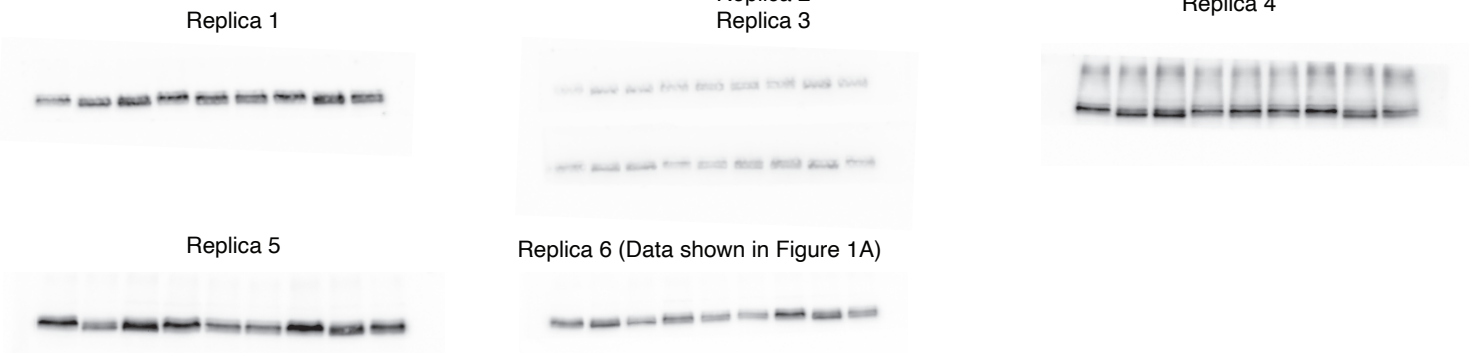

Anti-Snf1-pThr<sup>210</sup>

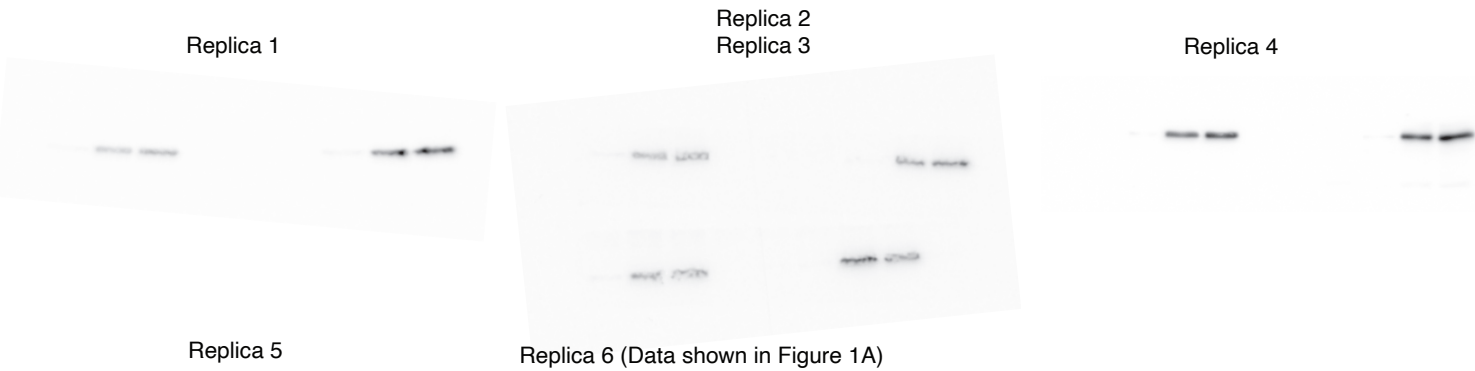

Anti-His<sub>6</sub>

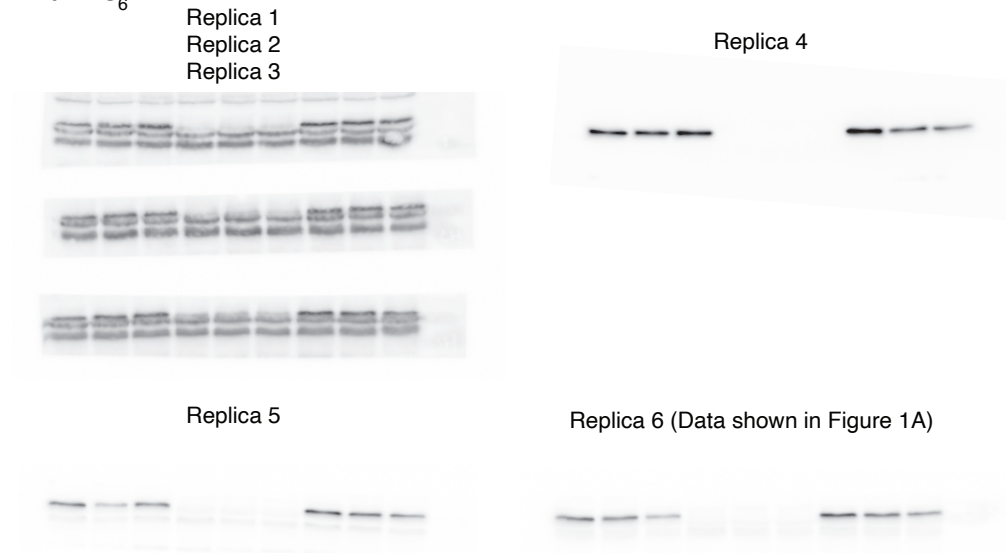

# Figure 1C

|     | Exp | -C; DMSO |   |   |   |   |   |   |   |    |    |    |    |
|-----|-----|----------|---|---|---|---|---|---|---|----|----|----|----|
| min |     | 2        | 3 | 4 | 5 | 6 | 7 | 8 | 9 | 10 | 11 | 12 | 15 |

  

|     | Exp | -C; 2NM-PP1 |   |   |   |   |   |   |   |    |    |    |    |
|-----|-----|-------------|---|---|---|---|---|---|---|----|----|----|----|
| min |     | 2           | 3 | 4 | 5 | 6 | 7 | 8 | 9 | 10 | 11 | 12 | 15 |

Loading order:

## Anti-Sch9-pThr<sup>737</sup>

Replica 1

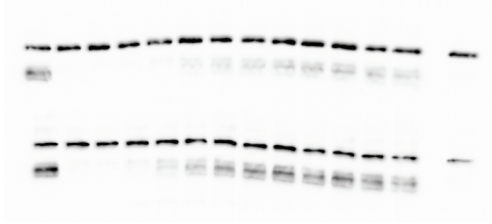

Replica 2

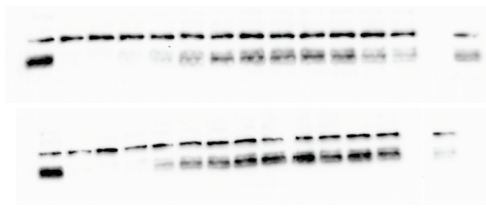

Replica 3

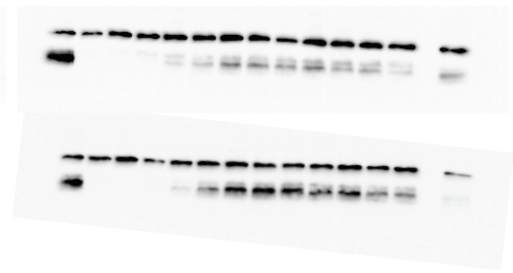

Replica 4 (Data shown in Figure 1C)

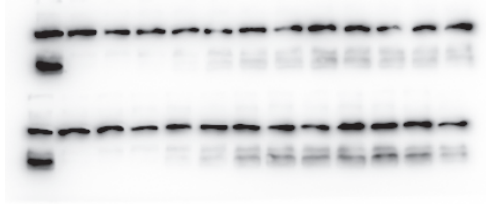

## Anti-Sch9

Replica 1

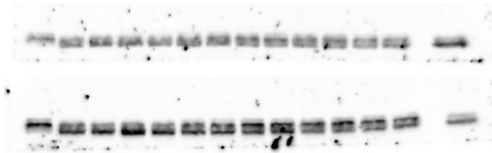

Replica 2

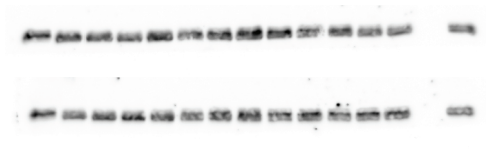

Replica 3

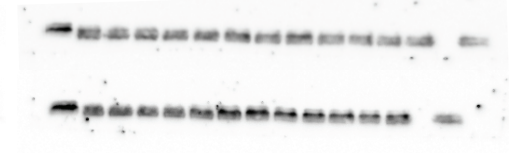

Replica 4 (Data shown in Figure 1C)

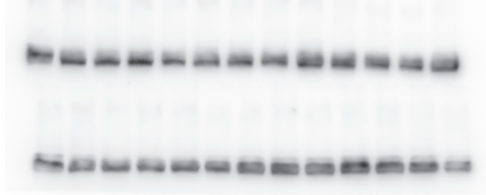

## Anti-Snf1-pThr<sup>210</sup>

Replica 1

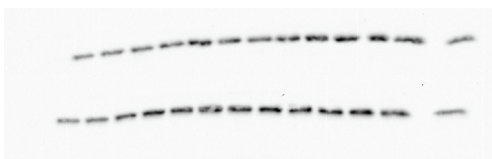

Replica 2

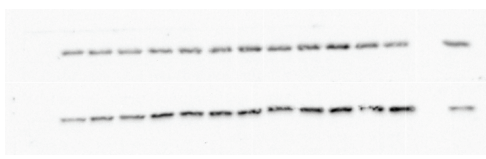

Replica 3

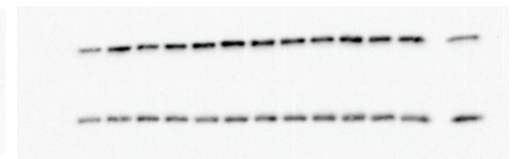

Replica 4 (Data shown in Figure 1C)

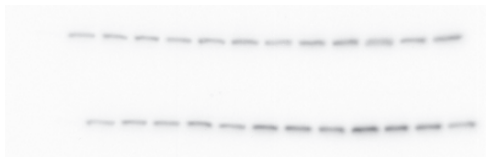

## Anti-His<sub>6</sub>

Replica 1

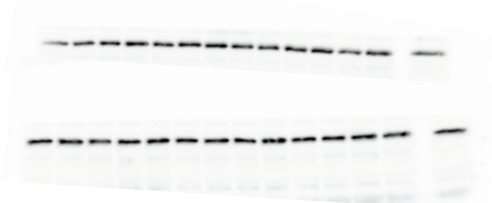

Replica 2

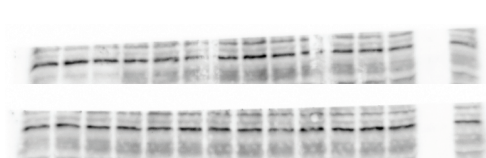

Replica 3

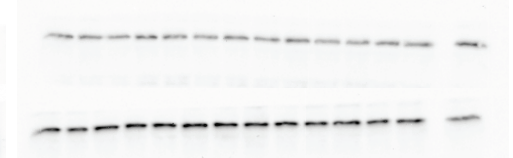

Replica 4 (Data shown in Figure 1C)

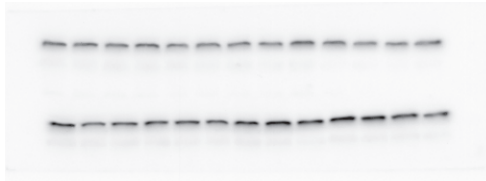

# Figure 1E

Loading order: WT *reg1Δ*

Replica 4 (Data shown in Figure 1E)

Anti-Sch9-pThr<sup>737</sup>

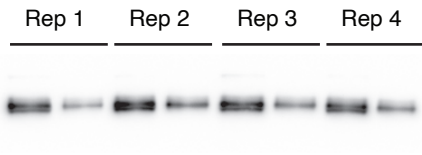

Anti-Sch9

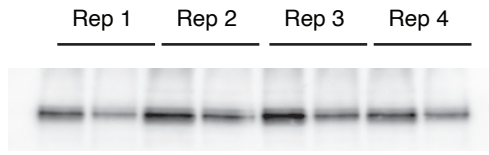

Anti-Snf1-pThr<sup>210</sup>

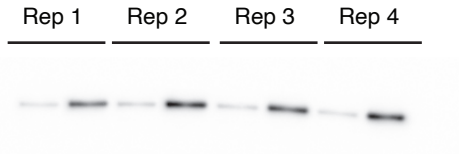

Anti-His<sub>6</sub>

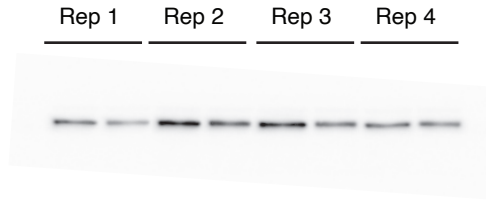

# Figure 1F

WT  
*gtr1Δ*  
*snf1Δ*  
*snf1<sup>es</sup>*  
*reg1Δ*

Spotting order:

Control

Replica 1

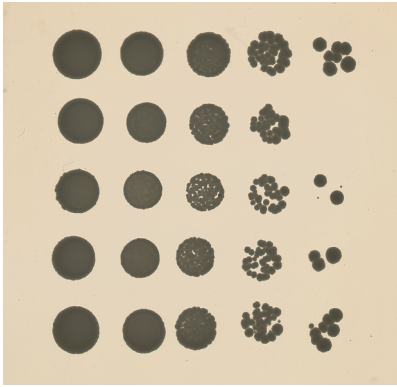

Replica 2 (Data shown in Figure 1F)

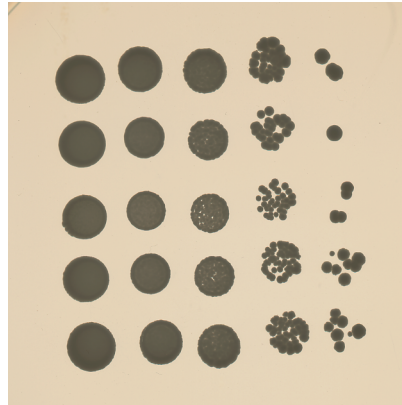

Replica 3

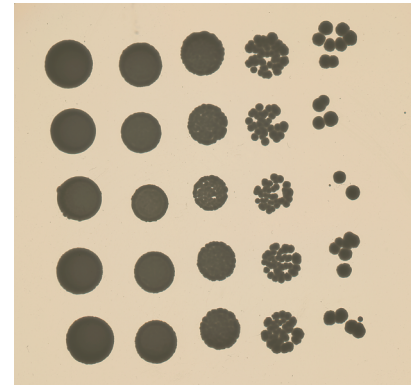

3 nM Rapamycin

Replica 1

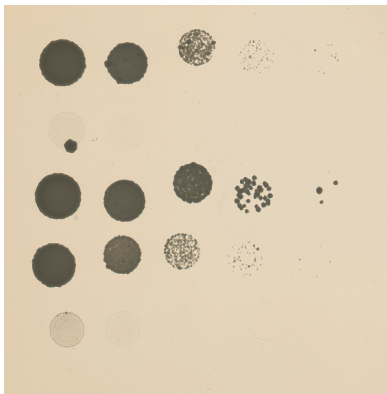

Replica 2 (Data shown in Figure 1F)

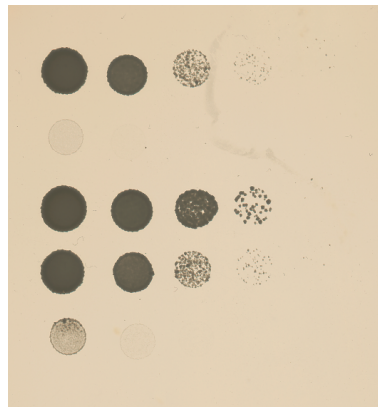

Replica 3

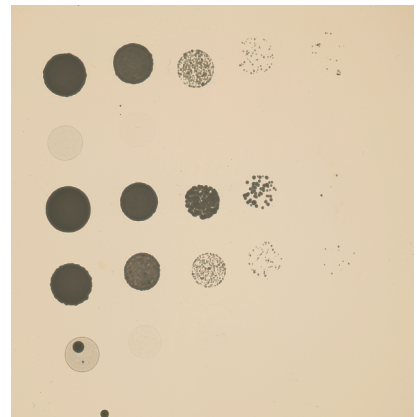

Supplement: elife-84319-fig1-data2.pdf [file elife-84319-fig1-data2.pdf]
