# Supplementary material for: Snf1/AMPK fine-tunes TORC1 signaling in response to glucose starvation
Source: PubMed Central journal article supplement (PMC9937656; doi:10.7554/elife.84319), 2023-02-07

# Figure 2A

Loading order:

| min | Exp | -N | -C | 2% Glc |   |   |    |    |         |   |   |    |    |
|-----|-----|----|----|--------|---|---|----|----|---------|---|---|----|----|
|     |     |    |    | DMSO   |   |   |    |    | 2NM-PP1 |   |   |    |    |
| 20  |     |    |    | 1      | 2 | 5 | 10 | 15 | 1       | 2 | 5 | 10 | 15 |

Anti-Sch9-pThr<sup>737</sup>

Replica 1

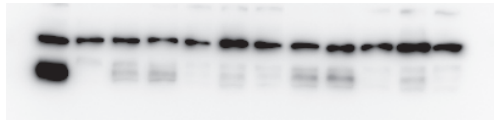

Replica 2

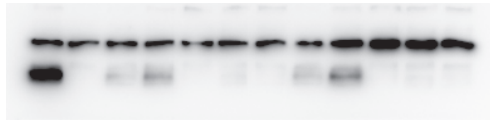

Replica 3 (Data shown in Figure 2A)

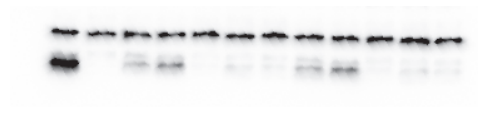

Anti-Sch9

Replica 1  
Replica 2

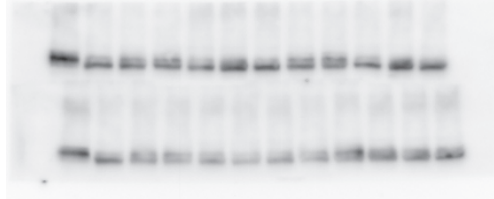

Replica 3 (Data shown in Figure 2A)

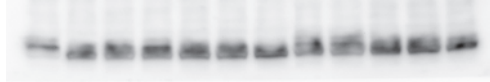

Anti-Snf1-pThr<sup>210</sup>

Replica 1  
Replica 2

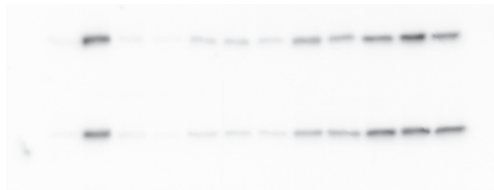

Replica 3 (Data shown in Figure 2A)

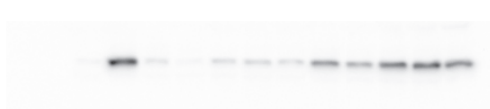

Anti-His<sub>6</sub>

Replica 1  
Replica 2

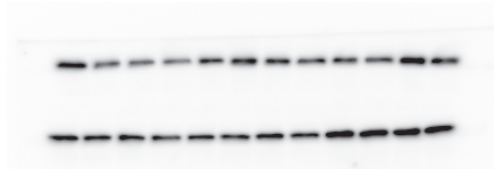

Replica 3 (Data shown in Figure 2A)

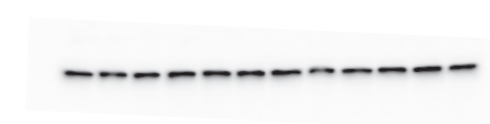



# Figure 2E

Loading order:

|     |              | 3.3 mM Gln |   |   |    |    |         |   |   |    |    |
|-----|--------------|------------|---|---|----|----|---------|---|---|----|----|
|     |              | DMSO       |   |   |    |    | 2NM-PP1 |   |   |    |    |
| min | Exp -N<br>-c | 1          | 2 | 5 | 10 | 15 | 1       | 2 | 5 | 10 | 15 |

Anti-Sch9-pThr<sup>737</sup>

Replica 1

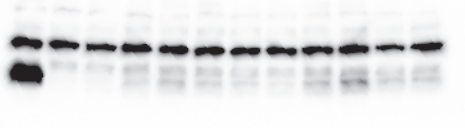

Replica 2

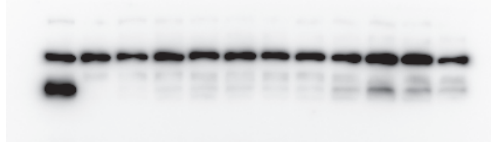

Replica 3 (Data shown in Figure 2A)

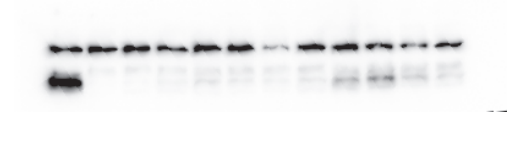

Anti-Sch9

Replica 1

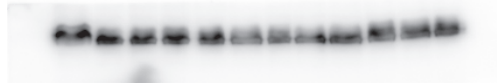

Replica 2

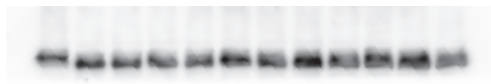

Replica 3 (Data shown in Figure 2A)

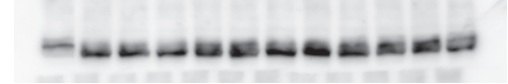

Anti-Snf1-pThr<sup>210</sup>

Replica 1

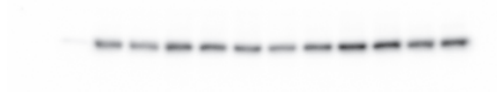

Replica 2

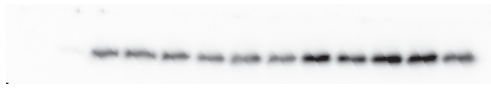

Replica 3 (Data shown in Figure 2A)

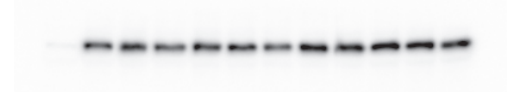

Anti-His<sub>6</sub>

Replica 1  
Replica 2

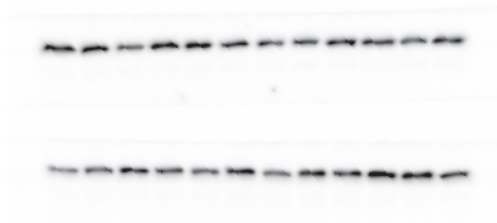

Replica 3 (Data shown in Figure 2A)

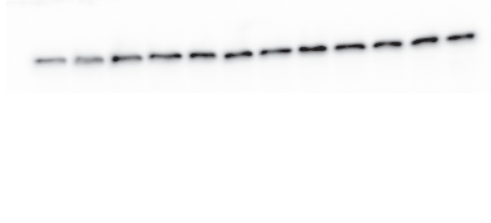

Supplement: elife-84319-fig2-data2.pdf [file elife-84319-fig2-data2.pdf]
