# Supplementary material for: Snf1/AMPK fine-tunes TORC1 signaling in response to glucose starvation
Source: PubMed Central journal article supplement (PMC9937656; doi:10.7554/elife.84319), 2023-02-07

# Figure 4D

Loading order: His<sub>6</sub>-Pib2<sup>221-635</sup>    -    WT    S268A    S309A    SASA  
Snf1    WT TA    WT TA    WT TA    WT TA    WT TA

<sup>32</sup>P Autoradiography

Replica 1

Replica 2

Replica 3

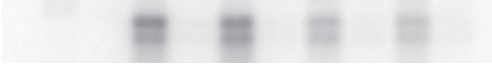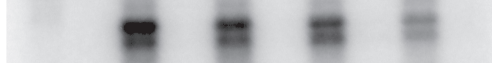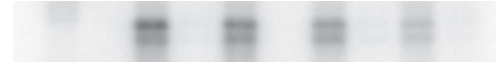

Sypro Ruby - Snf1 variants

Replica 1

Replica 2

Replica 3

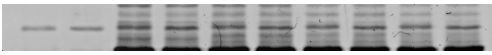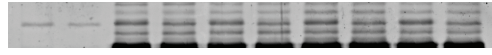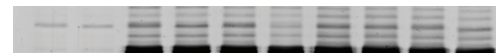

Sypro Ruby - Pib2 variants

Replica 1

Replica 2

Replica 3

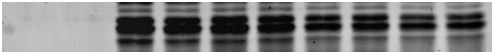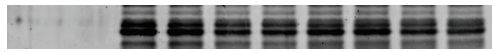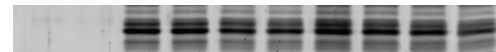

# Figure 4F

Loading order:

|         | <i>snf1<sup>as</sup></i> |    | <i>snf1<sup>as</sup> pib2<math>\Delta</math></i> |    | <i>snf1<sup>as</sup> pib2<sup>SASA</sup></i> |    | <i>snf1<sup>as</sup> pib2<sup>SESE</sup></i> |    |
|---------|--------------------------|----|--------------------------------------------------|----|----------------------------------------------|----|----------------------------------------------|----|
|         | Exp                      | -C | Exp                                              | -C | Exp                                          | -C | Exp                                          | -C |
| 2NM-PP1 | -                        | +  | -                                                | +  | -                                            | +  | -                                            | +  |

Anti-Sch9-pThr<sup>737</sup>

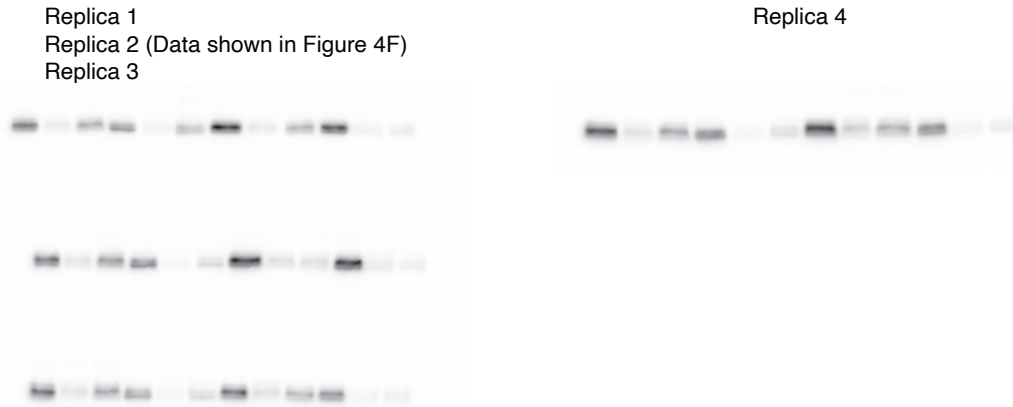

Anti-Sch9

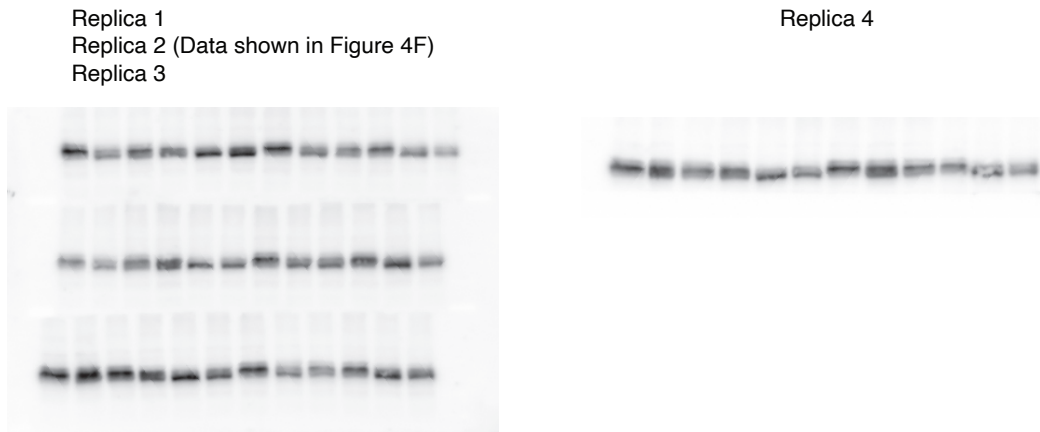

Anti-Snf1-pThr<sup>210</sup>

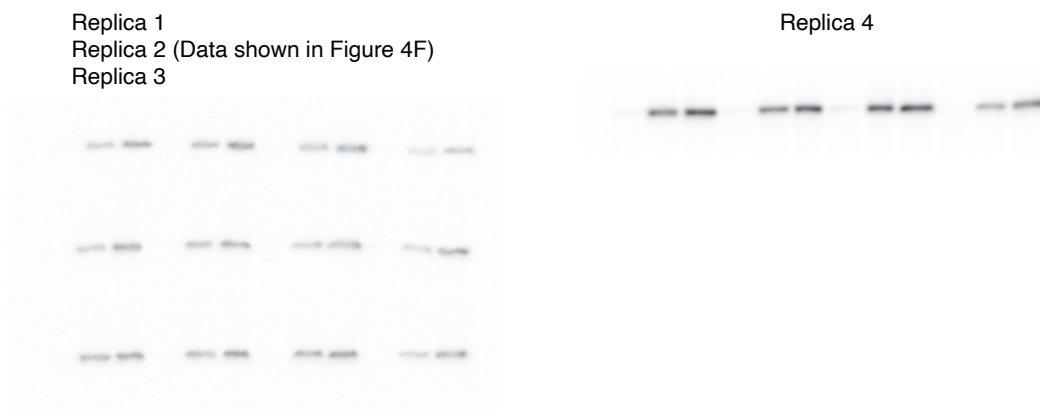

Anti-His<sub>6</sub>

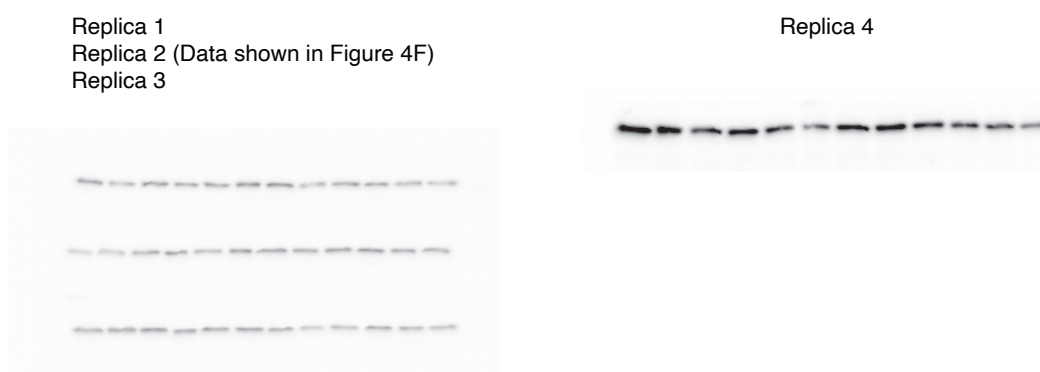

# Figure 4H

Loading order:

|                        |   |    |    |    |
|------------------------|---|----|----|----|
| Pib2-myc <sub>13</sub> | - | WT | SA | SE |
| Kog1-HA <sub>3</sub>   | + | +  | +  | +  |

Anti-HA  
Input

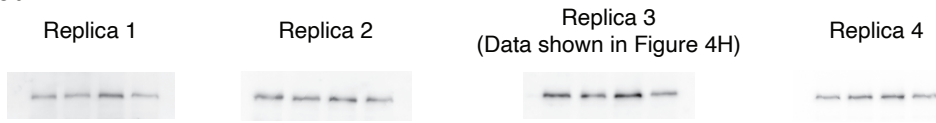

IP: anti-myc

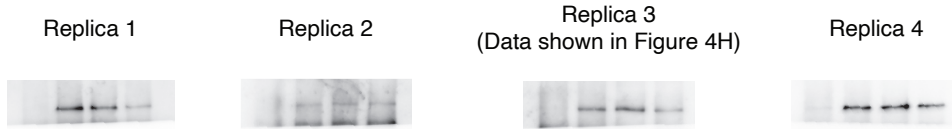

Anti-myc  
Input

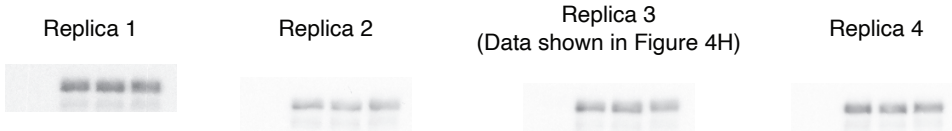

IP: anti-myc

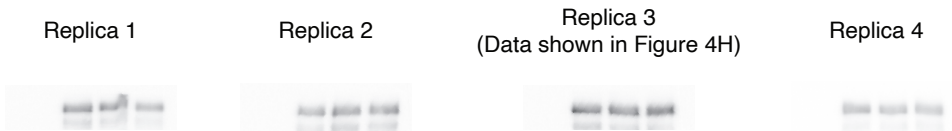

# Figure 4I

Loading order: Pib2-myc<sub>13</sub> variant 

| <i>snf1<sup>as</sup></i> |    |    |
|--------------------------|----|----|
| WT                       | SA | SE |
|                          | SA | SE |

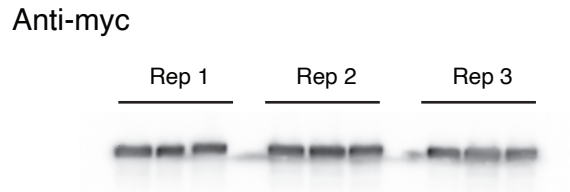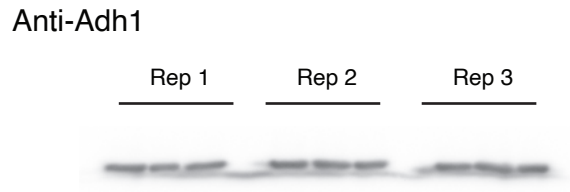

Supplement: elife-84319-fig4-data2.pdf [file elife-84319-fig4-data2.pdf]
