# Supplementary material for: Snf1/AMPK fine-tunes TORC1 signaling in response to glucose starvation
Source: PubMed Central journal article supplement (PMC9937656; doi:10.7554/elife.84319), 2023-02-07

# Figure 5C

Loading order:

| Sch9 <sup>1-394</sup> | <sup>32</sup> P |    |    |    |       |    | Sypro Ruby |    |    |    |       |    |  |  |
|-----------------------|-----------------|----|----|----|-------|----|------------|----|----|----|-------|----|--|--|
|                       | -               |    | WT |    | S288A |    | -          |    | WT |    | S288A |    |  |  |
|                       | WT              | TA | WT | TA | WT    | TA | WT         | TA | WT | TA | WT    | TA |  |  |
| Snf1                  |                 |    |    |    |       |    |            |    |    |    |       |    |  |  |

## <sup>32</sup>P Autoradiography

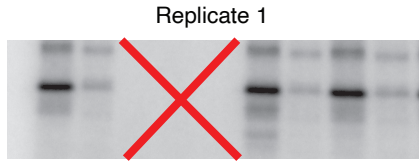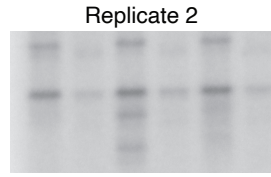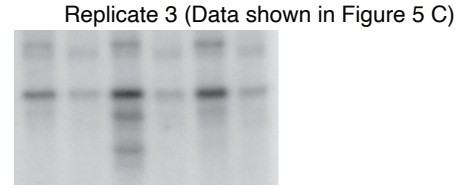

## Sypro Ruby

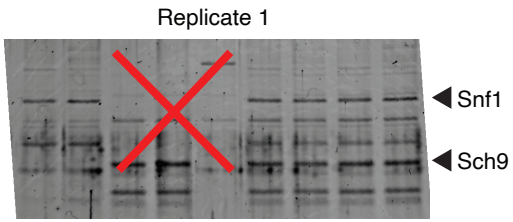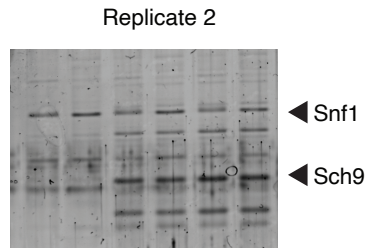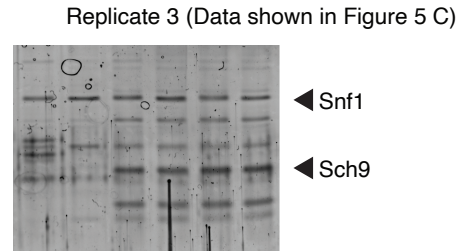

Replica 4 (Data shown in Figure 6A)

# Figure 5D

Loading order:

|                 | <i>snf1<sup>as</sup></i> |      |   |    |         |   | <i>snf1<sup>as</sup> sch9<sup>S288A</sup></i> |     |      |   |    |         | <i>snf1<sup>as</sup></i> |    |                 |      |   |    | <i>snf1<sup>as</sup> sch9<sup>S288E</sup></i> |   |    |     |      |   |    |         |   |    |    |
|-----------------|--------------------------|------|---|----|---------|---|-----------------------------------------------|-----|------|---|----|---------|--------------------------|----|-----------------|------|---|----|-----------------------------------------------|---|----|-----|------|---|----|---------|---|----|----|
|                 | Exp                      | DMSO |   |    | 2NM-PP1 |   |                                               | Exp | DMSO |   |    | 2NM-PP1 |                          |    | Exp             | DMSO |   |    | 2NM-PP1                                       |   |    | Exp | DMSO |   |    | 2NM-PP1 |   |    |    |
| -C (min)        |                          | 2    | 5 | 15 | 2       | 5 | 15                                            |     | 2    | 5 | 15 | 2       | 5                        | 15 |                 | 2    | 5 | 15 | 2                                             | 5 | 15 |     | 2    | 5 | 15 | 2       | 5 | 15 |    |
| 0.05% Glc (min) |                          | 2    | 5 | 15 | 2       | 5 | 15                                            |     | 2    | 5 | 15 | 2       | 5                        | 15 | 0.05% Glc (min) |      | 2 | 5  | 15                                            | 2 | 5  | 15  |      | 2 | 5  | 15      | 2 | 5  | 15 |

Anti-Sch9-pThr<sup>288</sup>

Replica 1

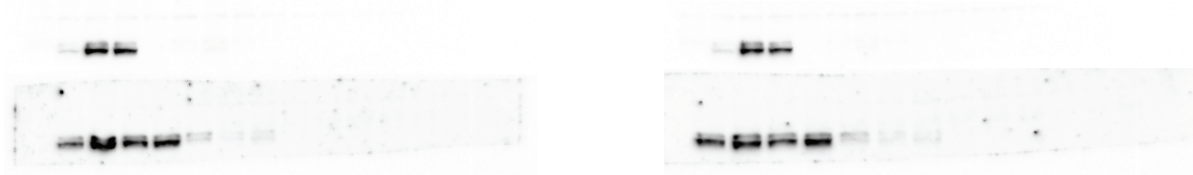

Replica 2

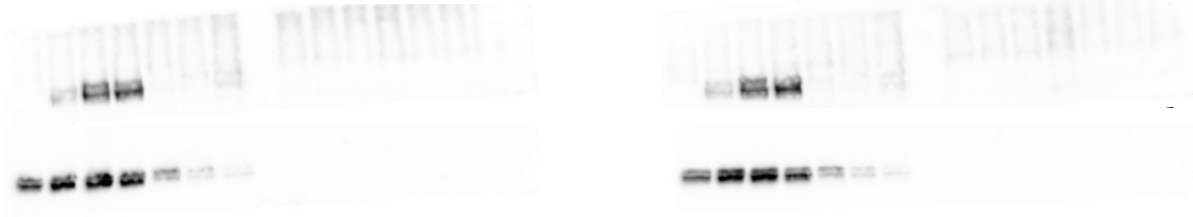

Replica 3 (Data shown in Figure 5D)

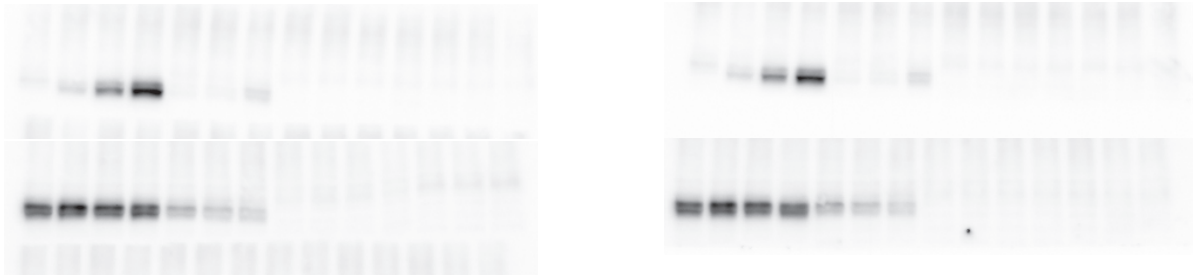

Anti-Sch9

Replica 1

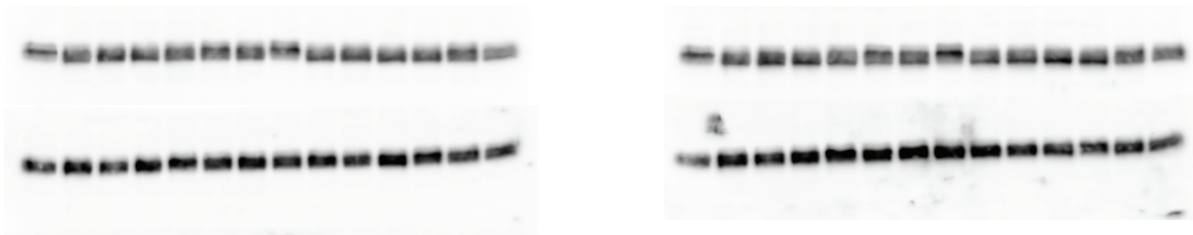

Replica 2

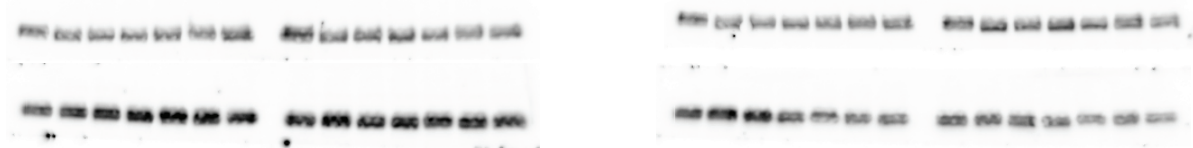

Replica 3 (Data shown in Figure 5D)

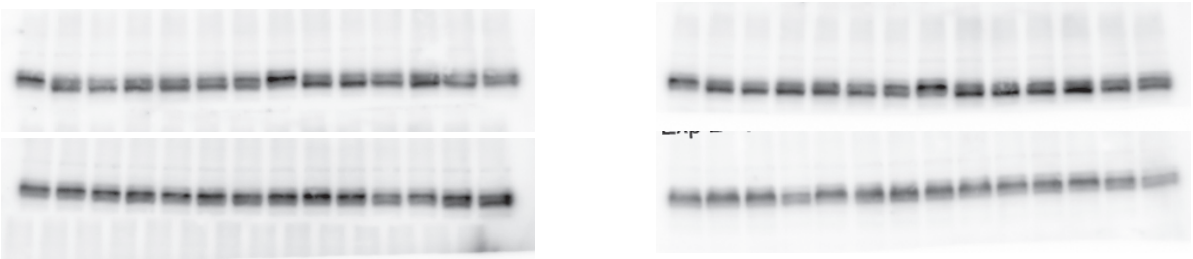

# Figure 5F

|         |    | <i>snf1<sup>as</sup></i> |    | <i>snf1<sup>as</sup></i> |    |   |
|---------|----|--------------------------|----|--------------------------|----|---|
|         |    | <i>sch9<sup>SA</sup></i> |    | <i>sch9<sup>SE</sup></i> |    |   |
| Exp     | -C | Exp                      | -C | Exp                      | -C |   |
| 2NM-PP1 | -  | +                        | -  | +                        | -  | + |

Loading order: 2NM-PP1

## Anti-Sch9-pThr<sup>737</sup>

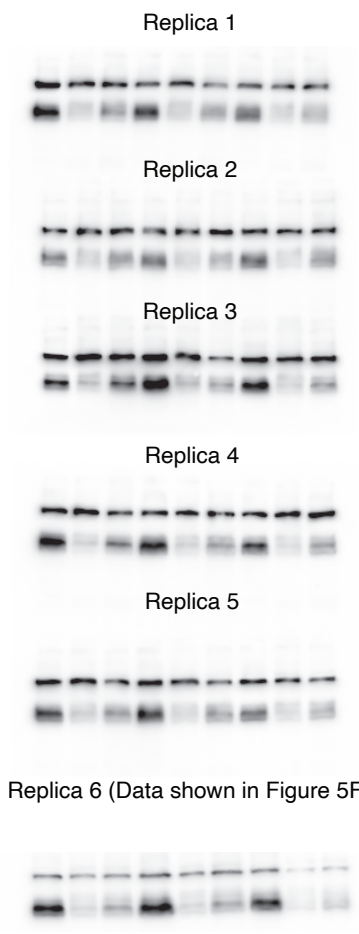

## Anti-Sch9

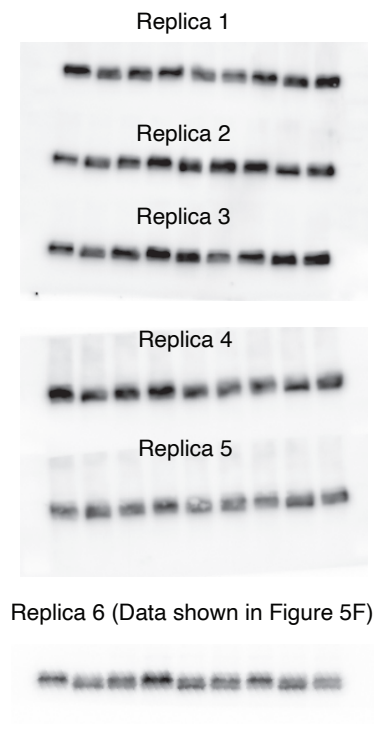

## Anti-Snf1-pThr<sup>210</sup>

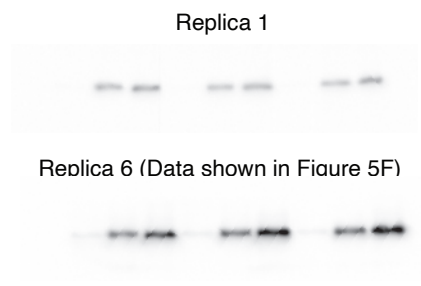

## Anti-His<sub>6</sub>

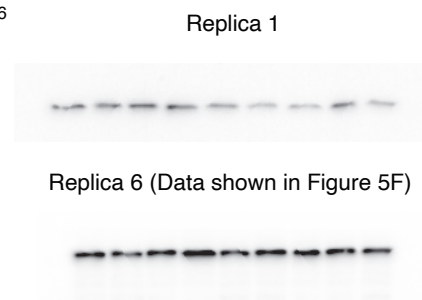

Supplement: elife-84319-fig5-data2.pdf [file elife-84319-fig5-data2.pdf]
