# Supplementary material for: Snf1/AMPK fine-tunes TORC1 signaling in response to glucose starvation
Source: PubMed Central journal article supplement (PMC9937656; doi:10.7554/elife.84319), 2023-02-07

# Figure 6A

|                |  | <i>snf1<sup>as</sup></i> |    |    |      |      |      |      |    |   |    |   |    |
|----------------|--|--------------------------|----|----|------|------|------|------|----|---|----|---|----|
| Pib2 variant   |  | WT                       | WT | WT | SASA | SESE | SASA | SESE |    |   |    |   |    |
| Sch9 variant   |  | WT                       | SA | SE | WT   | WT   | SA   | SE   |    |   |    |   |    |
| Loading order: |  | E                        | -C | E  | -C   | E    | -C   | E    | -C | E | -C | E | -C |
| 2NM-PP1        |  | -                        | -  | -  | -    | -    | -    | -    | -  | - | -  | - | -  |
| 2NM-PP1        |  | E                        | -C | E  | -C   | E    | -C   | E    | -C | E | -C | E | -C |
|                |  | +                        | +  | +  | +    | +    | +    | +    | +  | + | +  | + | +  |

## Anti-Sch9-pThr<sup>737</sup>

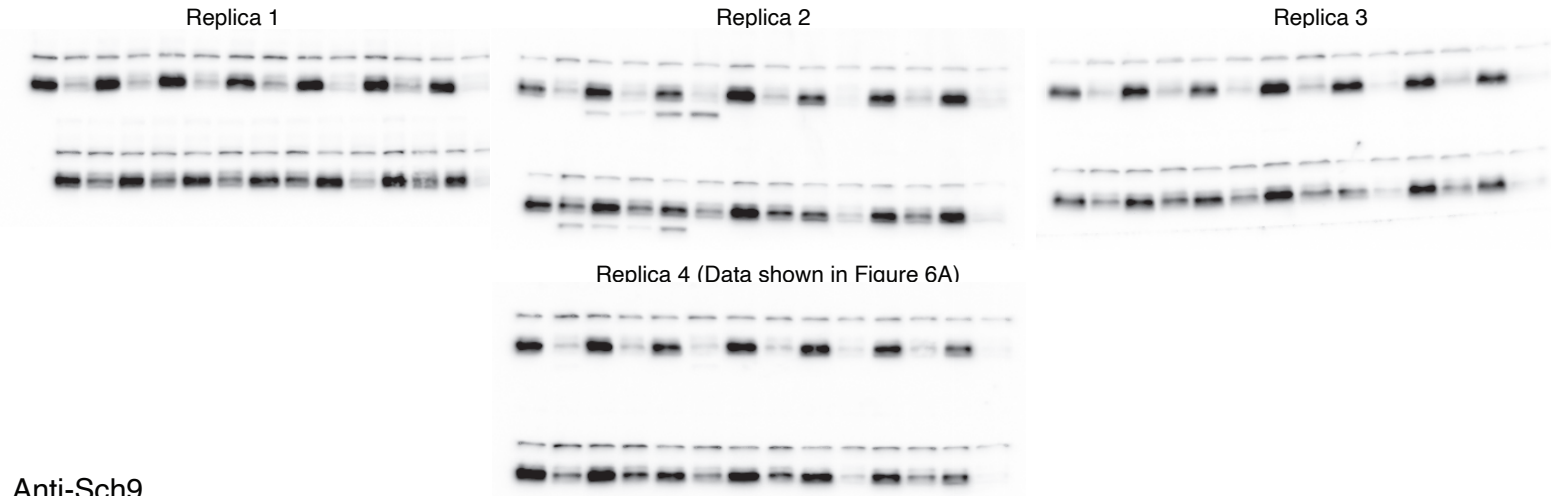

## Anti-Sch9

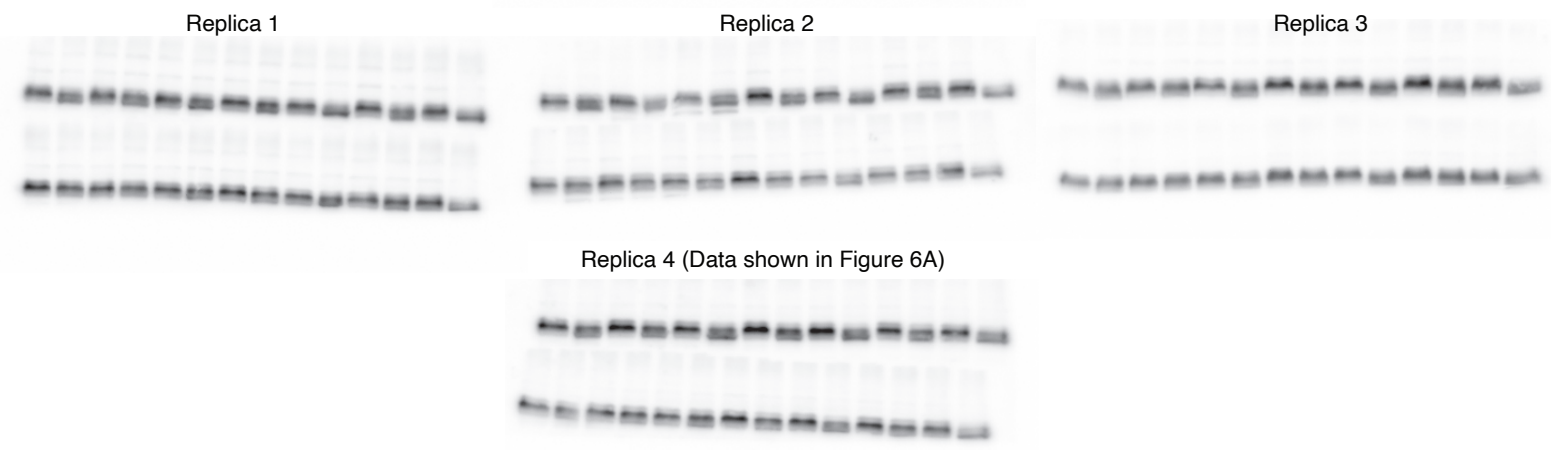

## Anti-Snf1-pThr<sup>210</sup>

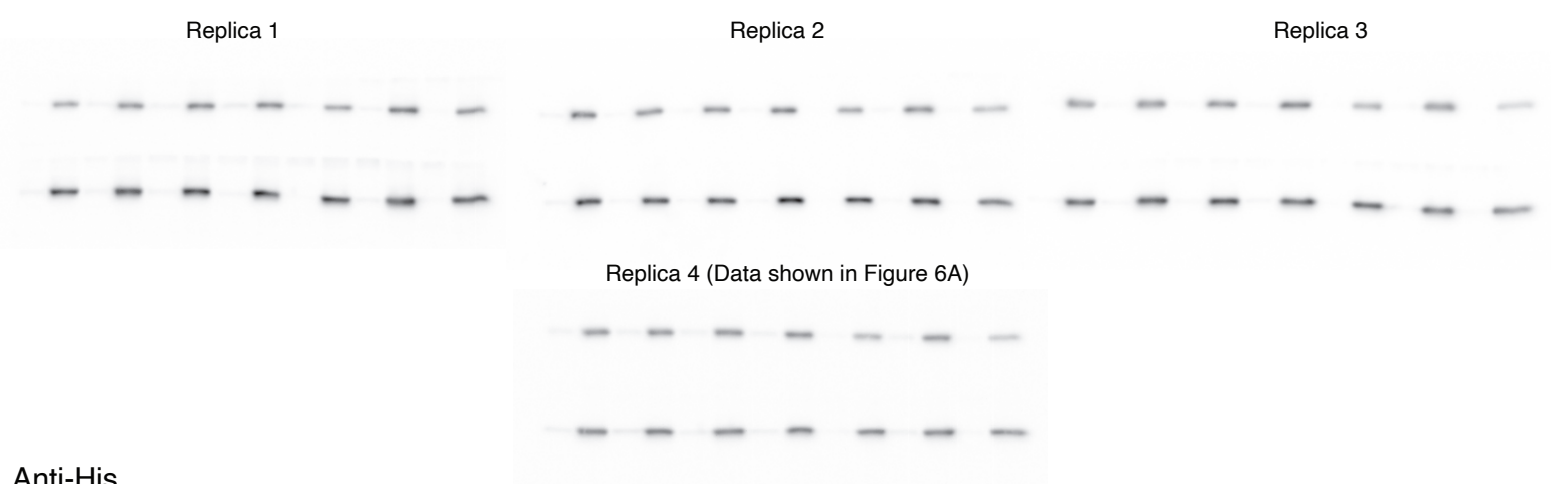

## Anti-His<sub>6</sub>

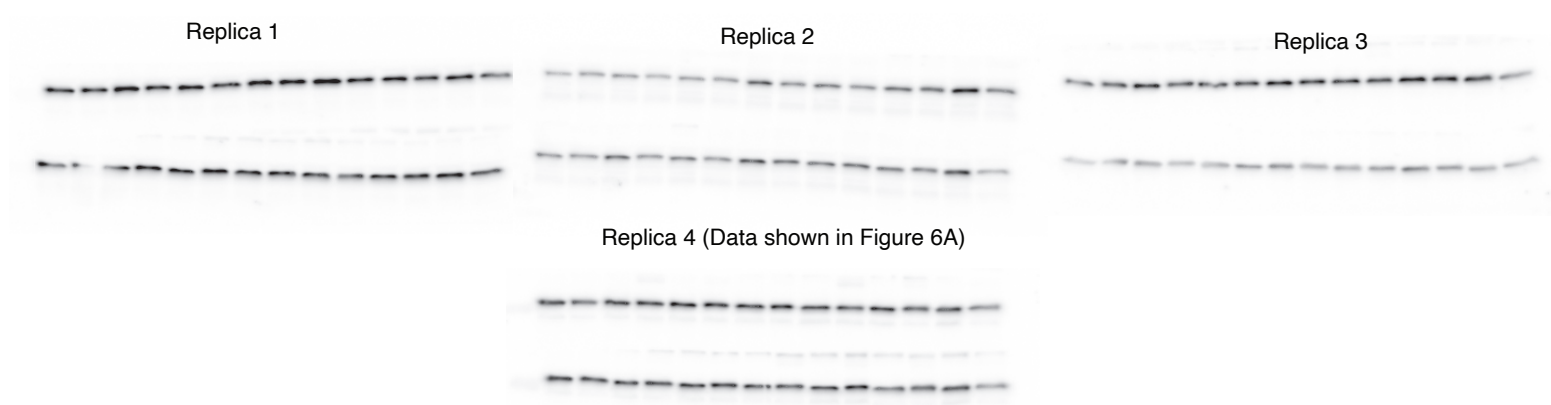

# Figure 6C

Loading order: SC Low N

## Anti-Sch9-pThr<sup>737</sup>

Rep 1 Rep 2 Rep 3 Rep 4

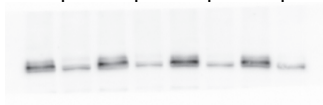

Rep 5 Rep 6 Rep 7 Rep 8

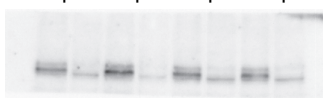

Rep 9 Rep 10 (Data shown in Figure 6C)

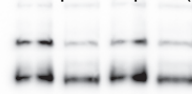

## Anti-Sch9

Rep 1 Rep 2 Rep 3 Rep 4

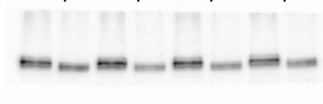

Rep 5 Rep 6 Rep 7 Rep 8

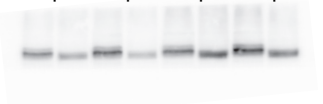

Rep 9 Rep 10 (Data shown in Figure 6C)

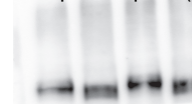

## Anti-Snf1-pThr<sup>210</sup>

Rep 1 Rep 2 Rep 3 Rep 4

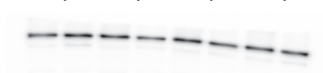

Rep 5 Rep 6 Rep 7 Rep 8

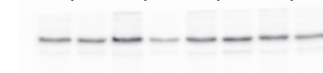

Rep 9 Rep 10 (Data shown in Figure 6C)

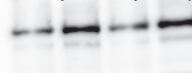

## Anti-His<sub>6</sub>

Rep 1 Rep 2 Rep 3 Rep 4

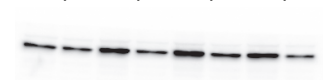

Rep 5 Rep 6 Rep 7 Rep 8

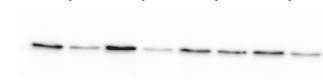

Rep 9 Rep 10 (Data shown in Figure 6C)

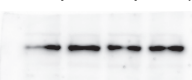

Replica 4 (Data shown in Figure 6A)

# Figure 6D

Loading order:

| Pib2 variant | <i>snf1<sup>as</sup></i> |    |    |      |      |      |      |      |
|--------------|--------------------------|----|----|------|------|------|------|------|
|              | WT                       | WT | WT | SASA | SESE | SASA | SESE | SESE |
| Sch9 variant | WT                       | SA | SE | WT   | WT   | SA   | SE   | SE   |

## Anti-Sch9-pThr<sup>737</sup>

Replica 1 (Data shown in Figure 6D)

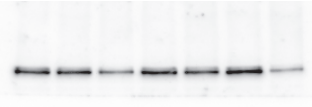

Replica 2

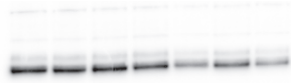

Replica 3

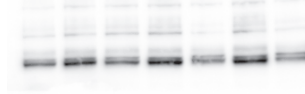

Replica 4

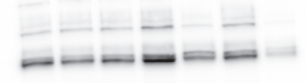

## Anti-Sch9

Replica 1 (Data shown in Figure 6D)

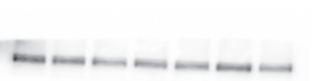

Replica 2

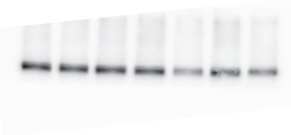

Replica 3

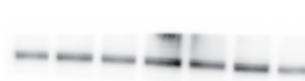

Replica 4

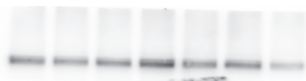

## Anti-Snf1-pThr<sup>210</sup>

Replica 1 (Data shown in Figure 6D)

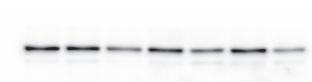

Replica 2

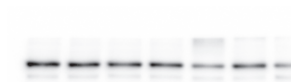

Replica 3

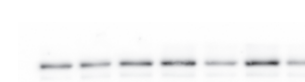

Replica 4

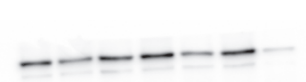

## Anti-His<sub>6</sub>

Replica 1 (Data shown in Figure 6D)

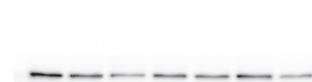

Replica 2

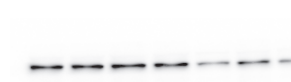

Replica 3

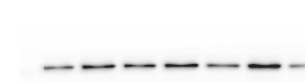

Replica 4

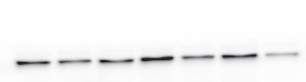

## Anti-Adh1

Replica 1 (Data shown in Figure 6D)

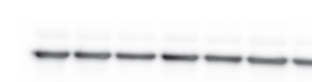

Replica 2

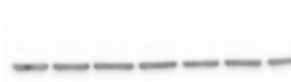

Replica 3

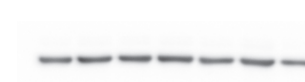

Replica 4

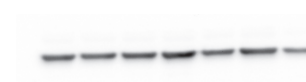

# Figure 6E

Spotting order:

*snf1<sup>as</sup>*

|                                              |
|----------------------------------------------|
| WT                                           |
| <i>snf1<sup>as</sup></i>                     |
| <i>pib2Δ</i>                                 |
| <i>sch9<sup>SA</sup></i>                     |
| <i>sch9<sup>SE</sup></i>                     |
| <i>pib2<sup>SASA</sup></i>                   |
| <i>pib2<sup>SESE</sup></i>                   |
| <i>sch9<sup>SA</sup> pib2<sup>SASA</sup></i> |
| <i>sch9<sup>SE</sup> pib2<sup>SESE</sup></i> |

## Control

Replica 1 (Data shown in Figure 6E)

Replica 2

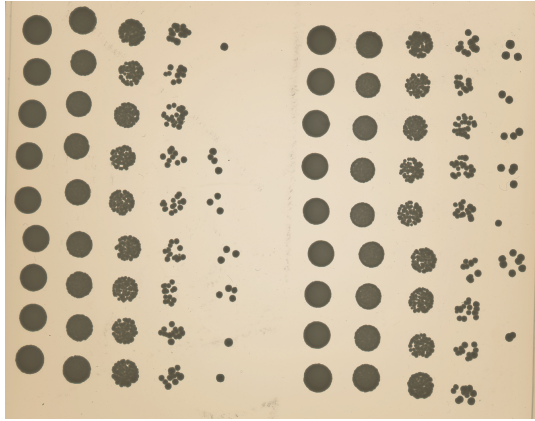

Replica 3

Replica 4

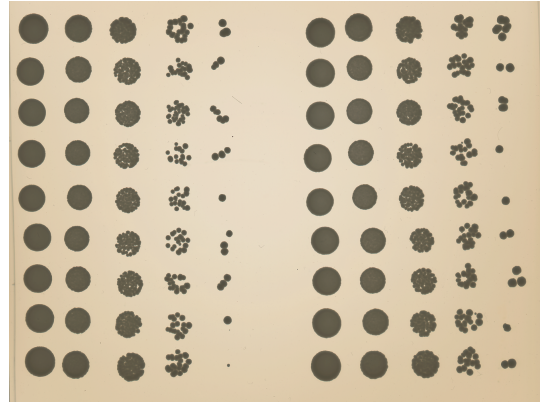

## 2.5 nM Rapamycin

Replica 1 (Data shown in Figure 6E)

Replica 2

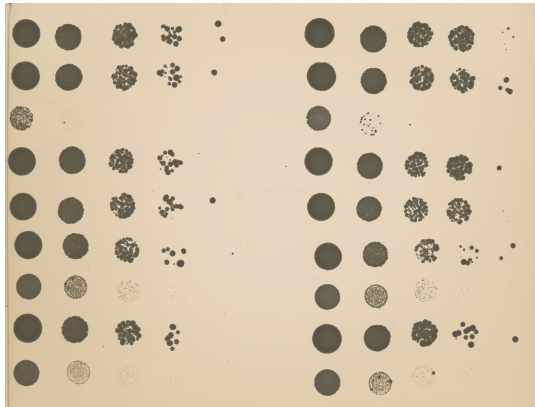

Replica 3

Replica 4

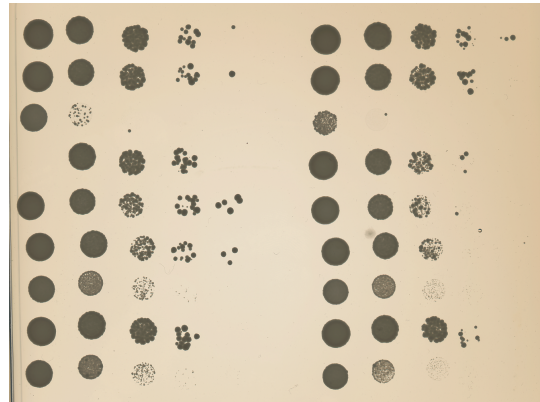

Supplement: elife-84319-fig6-data2.pdf [file elife-84319-fig6-data2.pdf]
