# Supplementary material for: Snf1/AMPK fine-tunes TORC1 signaling in response to glucose starvation
Source: PubMed Central journal article supplement (PMC9937656; doi:10.7554/elife.84319), 2023-02-07

# Figure 5-figure supplement 1

Loading order:

|                       |      |    |    |    |    |    |    |    |    |    |    |    |
|-----------------------|------|----|----|----|----|----|----|----|----|----|----|----|
|                       | Snf1 | WT | TA | -  | -  | -  | WT | TA | WT | TA | WT | TA |
| Sch9 <sup>1-394</sup> | -    | -  | WT | SA | -  | WT | WT | SA | SA | -  | -  | -  |
| Sch9                  | -    | -  | -  | -  | KD | -  | -  | -  | -  | KD | KD | -  |

Anti-Sch9-pSer<sup>288</sup>

Replica 1

Replica 2 (Data shown in Figure 5-figure supplement 1)

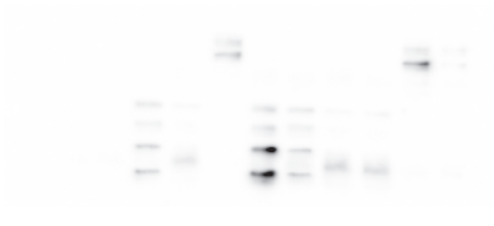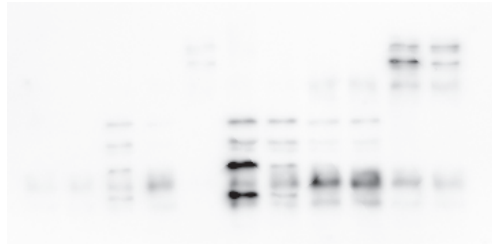

Anti-Sch9

Replica 1

Replica 2 (Data shown in Figure 5-figure supplement 1)

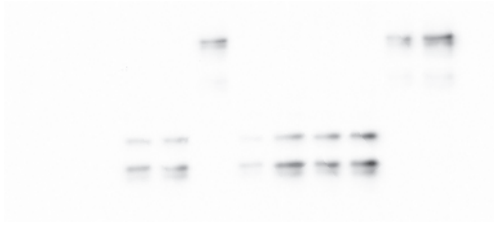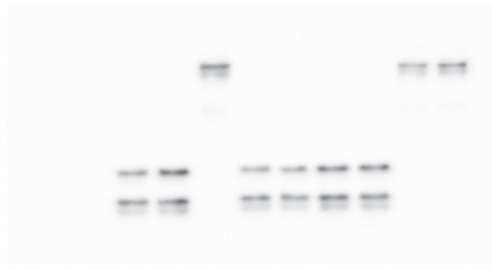

Supplement: elife-84319-fig5-figsupp1-data1.pdf [file elife-84319-fig5-figsupp1-data1.pdf]
