# Supplementary material for: Snf1/AMPK fine-tunes TORC1 signaling in response to glucose starvation
Source: eLife journal article supplement (doi:10.7554/elife.84319), 2023-02-07

# Figure 1-figure supplement 1A

Loading order:

|         | WT  |    | <i>snf1Δ</i> |    | <i>snf1<sup>as</sup></i> |    |
|---------|-----|----|--------------|----|--------------------------|----|
|         | Exp | -C | Exp          | -C | Exp                      | -C |
| 2NM-PP1 | -   | +  | -            | +  | -                        | +  |

## Anti-Sch9-pThr<sup>737</sup>

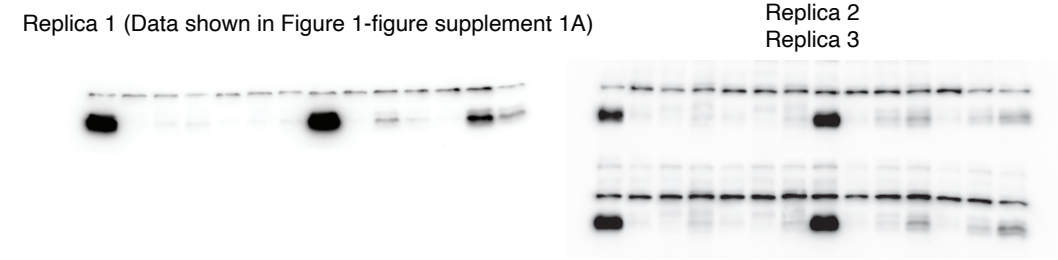

## Anti-Sch9

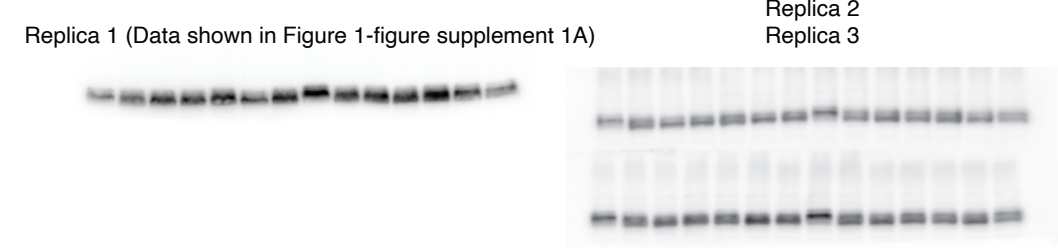

## Anti-Snf1-pThr<sup>210</sup>

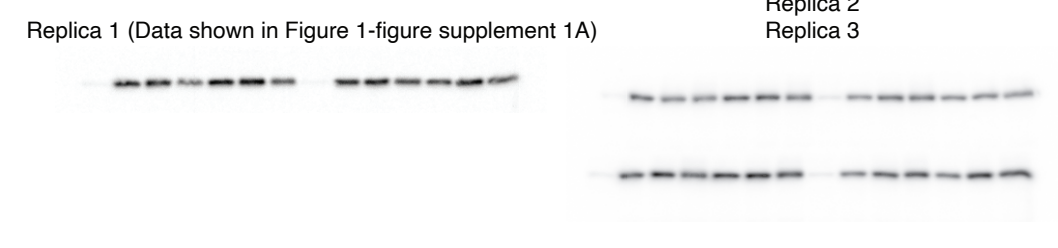

## Anti-His<sub>6</sub>

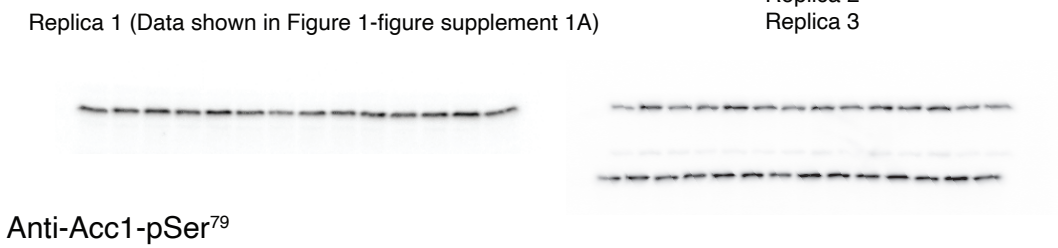

## Anti-Acc1-pSer<sup>79</sup>

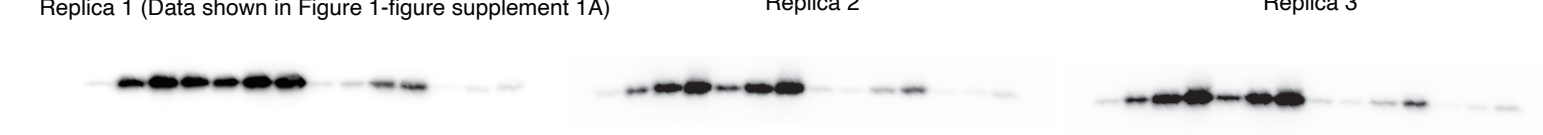

## Anti-GFP

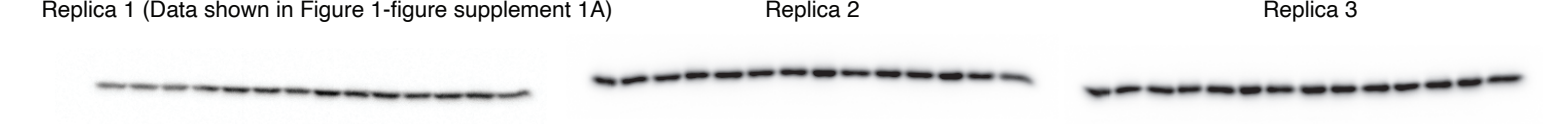

Supplement: fig1-figsupp1-data2 [file elife-84319-fig1-figsupp1-data2-v2.pdf]
