# Supplementary material for: Snf1/AMPK fine-tunes TORC1 signaling in response to glucose starvation
Source: eLife journal article supplement (doi:10.7554/elife.84319), 2023-02-07

# Figure 3-figure supplement 1C

Loading order:

|         | <i>snf1<sup>as</sup></i> |    | <i>snf1<sup>as</sup> lst4Δ</i> |    |
|---------|--------------------------|----|--------------------------------|----|
|         | Exp                      | -C | Exp                            | -C |
| 2NM-PP1 | -                        | +  | -                              | +  |

## Anti-Sch9-pThr<sup>737</sup>

Replica 1  
 Replica 2 (Data shown in Figure 3-figure supplement 1C)  
 Replica 3

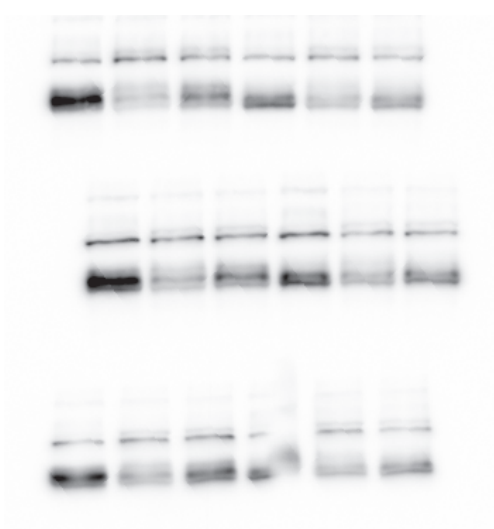

## Anti-Sch9

Replica 1  
 Replica 2 (Data shown in Figure 3-figure supplement 1C)  
 Replica 3

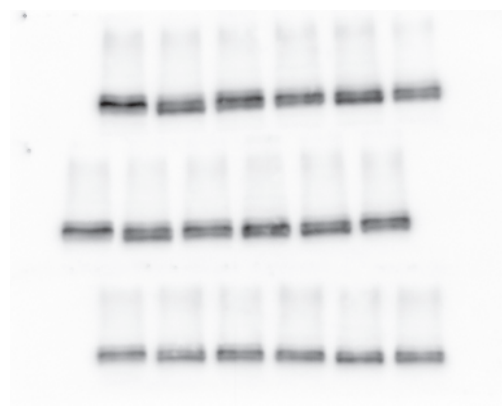

## Anti-Snf1-pThr<sup>210</sup>

Replica 1  
 Replica 2 (Data shown in Figure 3-figure supplement 1C)  
 Replica 3

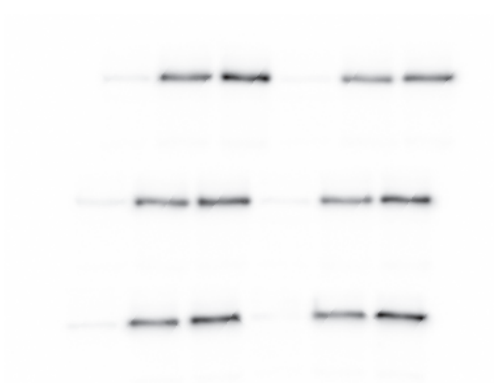

## Anti-His<sub>6</sub>

Replica 1  
 Replica 2 (Data shown in Figure 3-figure supplement 1C)  
 Replica 3

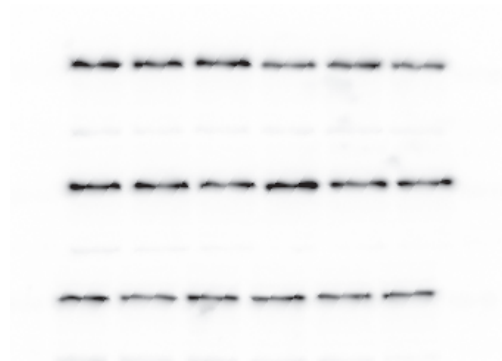

Supplement: fig3-figsupp1-data2 [file elife-84319-fig3-figsupp1-data2-v2.pdf]
