# Supplementary material for: Snf1/AMPK fine-tunes TORC1 signaling in response to glucose starvation
Source: eLife. 2023 Feb 7;12:e84319. doi: 10.7554/eLife.84319 (PMC9937656; doi:10.7554/eLife.84319)
Supplement: Figure 1—figure supplement 1—source data 1. [file elife-84319-fig1-figsupp1-data1.xlsx]

## Sheet: Figure 1-figure supplement 1C
Figure 1-figure supplement 1C
Replica 1		Sch9-pThr737	Tot Sch9	pSch9/total	Normalized
WT	EXP	8888.85	8727.95	1.01844	1
	-N	2629.22	8639.54	0.304325	0.298816
	-C	1616.01	8322.54	0.194173	0.190658
Replica 2		Sch9-pThr737	Tot Sch9	pSch9/total	Normalized
WT	EXP	6774.15	7595.71	0.891838	1
	-N	2081.03	7170.42	0.290225	0.325423
	-C	1197.36	5841.42	0.204977	0.229836
Replica 3		Sch9-pThr737	Tot Sch9	pSch9/total	Normalized
WT	EXP	12986.6	9455.08	1.37351	1
	-N	5031.85	8456.08	0.595058	0.433239
	-C	3142.05	6862.54	0.457856	0.333348
Sch9-pThr737		Replica 1	Replica 2	Replica 3	Average	SEM
WT	EXP	1	1	1	1	0
	-N	0.298816	0.325423	0.433239	0.352493	0.0410973
	-C	0.190658	0.229836	0.333348	0.251281	0.0425635
Replica 1		ACC1-pSer79	GFP	pACC1/total	Normalized
WT	EXP	369.092	13550.9	0.0272374	1
	-N	784.648	15645.4	0.0501521	1.8413
	-C	6494.64	14556.1	0.446179	16.3812
Replica 2		ACC1-pSer79	GFP	pACC1/total	Normalized
WT	EXP	416.678	16427.9	0.025364	1
	-N	625.406	15019.7	0.041639	1.64166
	-C	4107.45	12101.2	0.339424	13.3821
Replica 3		ACC1-pSer79	GFP	pACC1/total	Normalized
WT	EXP	373.435	14366.5	0.0259934	1
	-N	543.335	14546	0.0373529	1.43701
	-C	8869.73	17396.1	0.509868	19.6153
ACC1-pSer79		Replica 1	Replica 2	Replica 3	Average	SEM
WT	EXP	1	1	1	1	0
	-N	1.8413	1.64166	1.43701	1.63999	0.11671
	-C	16.3812	13.3821	19.6153	16.4595	1.79978
Replica 1		Snf1-pThr210	Tot Snf1	pSnf1/total	Normalized
WT	EXP	596.991	5461.57	0.109308	1
	-N	1520.31	5290.57	0.287361	2.62892
	-C	6962.76	4788.03	1.4542	13.3037
Replica 2		Snf1-pThr210	Tot Snf1	pSnf1/total	Normalized
WT	EXP	807.113	5247.74	0.153802	1
	-N	1253.48	5118.57	0.244888	1.59223
	-C	6332.64	3299.45	1.9193	12.4791
Replica 3		Snf1-pThr210	Tot Snf1	pSnf1/total	Normalized
WT	EXP	1197.48	5665.86	0.21135	1
	-N	1883.43	5196.03	0.362474	1.71504
	-C	9149.95	3491.86	2.62037	12.3983
Snf1-pThr210		Replica 1	Replica 2	Replica 3	Average	SEM
WT	EXP	1	1	1	1	0
	-N	2.62892	1.59223	1.71504	1.97873	0.327023
	-C	13.3037	12.4791	12.3983	12.727	0.289306
