# Supplementary material for: Snf1/AMPK fine-tunes TORC1 signaling in response to glucose starvation
Source: eLife. 2023 Feb 7;12:e84319. doi: 10.7554/eLife.84319 (PMC9937656; doi:10.7554/eLife.84319)
Supplement: Figure 1—source data 1. [file elife-84319-fig1-data1.xlsx]

## Sheet: Fig. 1B
Figure 1B
Replica 1			Sch9-pThr737	Tot Sch9	pSch9/total	Normalized
WT	2% Glc	EXP	3425.93	5525.76	0.619993	1
	0% Glc 10'	DMSO	589.263	7261.47	0.0811493	0.130887
		2NM-PP1	542.092	9960.83	0.0544224	0.087779
snf1∆	2% Glc	EXP	6407.18	8706.42	0.735914	1.18697
	0% Glc 10'	DMSO	3084.69	9180.54	0.336003	0.541947
		2NM-PP1	3233.69	8334.83	0.387973	0.62577
snf1-as	2% Glc	EXP	7755	8919.42	0.869452	1.40236
	0% Glc 10'	DMSO	736.335	10826.1	0.0680146	0.109702
		2NM-PP1	3054.64	8796.95	0.347238	0.560068
Replica 2			Sch9-pThr737	Tot Sch9	pSch9/total	Normalized
WT	2% Glc	EXP	14774	7773.3	1.90061	1
	0% Glc 10'	DMSO	871.163	7817.85	0.111433	0.05863
		2NM-PP1	539.678	7727.15	0.0698418	0.0367471
snf1∆	2% Glc	EXP	10479	7521.27	1.39325	0.733053
	0% Glc 10'	DMSO	4865.12	9212.51	0.5281	0.277859
		2NM-PP1	4350.12	9007.8	0.482929	0.254092
snf1-as	2% Glc	EXP	10896	8747.68	1.24559	0.655365
	0% Glc 10'	DMSO	1570.06	11266	0.139362	0.0733252
		2NM-PP1	6698.54	7745.02	0.864883	0.455056
Replica 3			Sch9-pThr737	Tot Sch9	pSch9/total	Normalized
WT	2% Glc	EXP	13420.8	6180.2	2.17158	1
	0% Glc 10'	DMSO	2005.72	7795.15	0.257304	0.118487
		2NM-PP1	1745.06	8461.85	0.206227	0.0949664
snf1∆	2% Glc	EXP	13150.5	5989.9	2.19545	1.01099
	0% Glc 10'	DMSO	5666.49	5867.95	0.965667	0.444684
		2NM-PP1	6917.73	8306.15	0.832845	0.38352
snf1-as	2% Glc	EXP	11426.1	9243.2	1.23616	0.569246
	0% Glc 10'	DMSO	2688.03	8769.78	0.306511	0.141147
		2NM-PP1	13935.7	6275.18	2.22076	1.02265
Replica 4			Sch9-pThr737	Tot Sch9	pSch9/total	Normalized
WT	2% Glc	EXP	7405.12	8780.82	0.843329	1
	0% Glc 10'	DMSO	636.92	9220.94	0.0690732	0.0819054
		2NM-PP1	801.991	10910.8	0.073504	0.0871593
snf1∆	2% Glc	EXP	5089.88	8230.72	0.6184	0.733285
	0% Glc 10'	DMSO	5691.83	9714.55	0.585908	0.694756
		2NM-PP1	5197.12	8765.6	0.5929	0.703047
snf1-as	2% Glc	EXP	10103.5	10092.1	1.00112	1.18711
	0% Glc 10'	DMSO	1936.03	9898.72	0.195584	0.231919
		2NM-PP1	2909.76	7689.02	0.378431	0.448734
Replica 5			Sch9-pThr737	Tot Sch9	pSch9/total	Normalized
WT	2% Glc	EXP	9687.2	8218.25	1.17874	1
	0% Glc 10'	DMSO	818.92	4987.47	0.164196	0.139297
		2NM-PP1	1432.65	8970.95	0.159699	0.135482
snf1∆	2% Glc	EXP	7210.07	8120.54	0.887881	0.753245
	0% Glc 10'	DMSO	3954.59	5680.3	0.696194	0.590624
		2NM-PP1	4191.12	5238.18	0.800112	0.678784
snf1-as	2% Glc	EXP	11123.7	9600.83	1.15862	0.982926
	0% Glc 10'	DMSO	2188.67	7798.25	0.280662	0.238103
		2NM-PP1	4742.66	7143.54	0.663909	0.563235
Replica 6			Sch9-pThr737	Tot Sch9	pSch9/total	Normalized
WT	2% Glc	EXP	8230.32	8849.25	0.930059	1
	0% Glc 10'	DMSO	1662.79	9913.66	0.167727	0.18034
		2NM-PP1	1068.58	6004	0.177977	0.191361
snf1∆	2% Glc	EXP	6321.95	8426.12	0.75028	0.806702
	0% Glc 10'	DMSO	3764	5636.47	0.667795	0.718014
		2NM-PP1	3870.12	5213.64	0.742308	0.79813
snf1-as	2% Glc	EXP	11075.9	11438.7	0.968282	1.0411
	0% Glc 10'	DMSO	2750.59	10126.1	0.271634	0.292061
		2NM-PP1	4446.37	6728.42	0.660834	0.71053
Sch9-pThr737			Replica 1	Replica 2	Replica 3	Replica 4	Replica 5	Replica 6	Average	SEM
WT	2% Glc	EXP	1	1	1	1	1	1	1	0
	0% Glc 10'	DMSO	0.130887	0.05863	0.118487	0.0819054	0.139297	0.18034	0.0974774	0.0166063
		2NM-PP1	0.087779	0.0367471	0.0949664	0.0871593	0.135482	0.191361	0.076663	0.0134227
snf1∆	2% Glc	EXP	1.18697	0.733053	1.01099	0.733285	0.753245	0.806702	0.916075	0.111543
	0% Glc 10'	DMSO	0.541947	0.277859	0.444684	0.694756	0.590624	0.718014	0.489811	0.0874074
		2NM-PP1	0.62577	0.254092	0.38352	0.703047	0.678784	0.79813	0.491607	0.104404
snf1-as	2% Glc	EXP	1.40236	0.655365	0.569246	1.18711	0.982926	1.0411	0.95352	0.202604
	0% Glc 10'	DMSO	0.109702	0.0733252	0.141147	0.231919	0.238103	0.292061	0.139023	0.033924
		2NM-PP1	0.560068	0.455056	1.02265	0.448734	0.563235	0.71053	0.621627	0.13609

## Sheet: Fig. 1D
Figure 1D
Replica 1				Sch9-pThr737	Sch9	P/Tot	Normalized
snf1-as	2% Glc		Exp	5810.66	6082.9	0.955245	1
	0% Glc	DMSO	2	206.95	6220.23	0.0332705	0.0348293
			3	141.95	6925.71	0.0204961	0.0214564
			4	175.95	8587.51	0.0204891	0.021449
			5	408.607	6905.07	0.0591749	0.0619474
			6	1125.34	9630.39	0.116853	0.122327
			7	1561.41	8573.66	0.182117	0.190649
			8	1281.06	7935.02	0.161444	0.169008
			9	1890.79	8023.37	0.23566	0.246702
			10	2351.81	8772.37	0.268093	0.280654
			11	2422.57	9501.2	0.254975	0.266921
			12	1680.26	7310.49	0.229842	0.24061
			15	1755.55	8443.73	0.207911	0.217653
	2% Glc		Exp	9889.2	10214.2	0.96818	0.98664
	0% Glc	2NM-PP1	2	368.778	10838.3	0.0340256	0.0346743
			3	282.364	10498.9	0.0268947	0.0274076
			4	211.192	13420.2	0.0157369	0.016037
			5	1158.23	11227.8	0.103158	0.105125
			6	2634.1	11754.5	0.224093	0.228366
			7	4625.25	11291.2	0.409632	0.417443
			8	6199.49	14268.8	0.43448	0.442764
			9	7259.37	12920.9	0.561832	0.572544
			10	7004.07	12003.6	0.583499	0.594624
			11	6999.73	11609.8	0.602918	0.614414
			12	5900.49	11303.3	0.522013	0.531966
			15	3961	10606	0.373467	0.380588
Replica 2				Sch9-pThr737	Sch9	P/Tot	Normalized
snf1-as	2% Glc		Exp	14128.6	8686.61	1.62648	1
	0% Glc	DMSO	2	117.536	10450.9	0.0112465	0.00691461
			3	30.121	9181.25	0.00328071	0.00201706
			4	247.192	8020.12	0.0308215	0.0189498
			5	659.678	11728.9	0.0562438	0.03458
			6	2104.45	7835.42	0.268581	0.16513
			7	3580	10879.6	0.329056	0.202312
			8	4687.2	13933.3	0.336403	0.206829
			9	4600.07	11264.4	0.408374	0.251078
			10	5209.61	8051.54	0.647033	0.397811
			11	4731.49	9207.25	0.513888	0.31595
			12	2347.4	7711.47	0.304403	0.187155
			15	1348.06	7018.42	0.192075	0.118092
	2% Glc		Exp	12685	9066.08	1.39917	1.16246
	0% Glc	2NM-PP1	2	22.121	7593.78	0.00291304	0.0024202
			3	49.536	9062.49	0.00546605	0.00454128
			4	73.536	9337.78	0.0078751	0.00654277
			5	1441.72	8866.9	0.162596	0.135087
			6	3807.83	7315.3	0.52053	0.432465
			7	5252.61	9677.49	0.542766	0.450939
			8	8242.15	11215	0.734923	0.610586
			9	8649.02	8626.37	1.00263	0.832999
			10	10295.3	9741.49	1.05685	0.878051
			11	6502.61	7980.15	0.814849	0.67699
			12	9621.56	9168.9	1.04937	0.871833
			15	6289.32	9442.02	0.666098	0.553406
Replica 3				Sch9-pThr737	Sch9	P/Tot	Normalized
snf1-as	2% Glc		Exp	7764.05	6216.23	1.249	1
	0% Glc	DMSO	2	140.778	5856.1	0.0240395	0.00799361
			3	65.536	5143.23	0.0127422	0.00423703
			4	282.607	4849.47	0.0582759	0.0193779
			5	313.263	4647.23	0.0674086	0.0224147
			6	832.527	4940.23	0.16852	0.0560362
			7	1951.15	5232.23	0.372911	0.124
			8	1616.67	4722.81	0.342311	0.113825
			9	1411.55	5454.93	0.258765	0.0860445
			10	1899.62	3858.15	0.492365	0.163721
			11	1191.31	3802.28	0.313314	0.104183
			12	1226.01	3638.86	0.336922	0.112033
			15	465.92	4169.81	0.111736	0.0371546
	2% Glc		Exp	5202.76	8953.3	0.5811	0.892668
	0% Glc	2NM-PP1	2	70.121	6874.3	0.0102005	0.0156696
			3	54.121	6430.47	0.00841634	0.0129289
			4	43.125	5375.4	0.00802266	0.0123242
			5	467.263	5582.23	0.0837055	0.128586
			6	1822.03	6444.88	0.28271	0.43429
			7	3017.35	9157.25	0.329504	0.506173
			8	3467.47	9559.83	0.362712	0.557187
			9	4235.71	8386.88	0.50504	0.775827
			10	3047.52	6077.35	0.501455	0.77032
			11	3885.59	8452.47	0.459699	0.706175
			12	1545.67	4999.35	0.309174	0.474944
			15	1893.62	6279.88	0.301537	0.463212
Replica 4				Sch9-pThr737	Sch9	P/Tot	Normalized
snf1-as	2% Glc		Exp	13848.8	10898.6	1.2707	1
	0% Glc	DMSO	2	2444.51	14798.9	0.165182	0.129993
			3	952.971	10258.3	0.0928977	0.0731075
			4	925.849	10973.6	0.0843707	0.0663971
			5	1132.38	8241.39	0.137402	0.108131
			6	1693.28	9266.17	0.182738	0.143809
			7	2336.89	9601.63	0.243385	0.191536
			8	2495.89	9087.09	0.274663	0.216151
			9	3685.22	11720.7	0.31442	0.247439
			10	3740.05	10259.2	0.364556	0.286894
			11	2842.33	8744.44	0.325044	0.255799
			12	2502.26	8332.85	0.300288	0.236317
			15	2192.77	10699.5	0.204941	0.161282
	2% Glc		Exp	11575.5	7908.61	1.46366	0.868166
	0% Glc	2NM-PP1	2	1668.56	6734.66	0.247757	0.146956
			3	971.142	7187.66	0.135112	0.0801416
			4	853.728	7242.2	0.117882	0.0699217
			5	1380.34	7698.78	0.179293	0.106347
			6	2126.53	7343.78	0.289568	0.171757
			7	3959.05	9002.95	0.439751	0.260837
			8	5462.12	9635.3	0.566887	0.336248
			9	5738.54	9167.95	0.625935	0.371272
			10	6453.37	11537.4	0.559341	0.331772
			11	7106.66	10783.1	0.659057	0.390919
			12	6025.49	9076.73	0.663839	0.393755
			15	3029.4	6268.37	0.483283	0.286658
Sch9-pThr737				Replica 1	Replica 2	Replica 3	Replica 4	Average	SEM
snf1-as	2% Glc		Exp	1	1	1	1	1	0
	0% Glc	DMSO	2	0.0348293	0.00691461	0.00799361	0.129993	0.0449326	0.0290791
			3	0.0214564	0.00201706	0.00423703	0.0731075	0.0252045	0.016548
			4	0.021449	0.0189498	0.0193779	0.0663971	0.0315434	0.0116307
			5	0.0619474	0.03458	0.0224147	0.108131	0.0567683	0.019012
			6	0.122327	0.16513	0.0560362	0.143809	0.121826	0.0236063
			7	0.190649	0.202312	0.124	0.191536	0.177124	0.0179053
			8	0.169008	0.206829	0.113825	0.216151	0.176453	0.0232313
			9	0.246702	0.251078	0.0860445	0.247439	0.207816	0.0406017
			10	0.280654	0.397811	0.163721	0.286894	0.28227	0.0478084
			11	0.266921	0.31595	0.104183	0.255799	0.235713	0.045749
			12	0.24061	0.187155	0.112033	0.236317	0.194029	0.0299008
			15	0.217653	0.118092	0.0371546	0.161282	0.133545	0.0380497
	2% Glc		Exp	0.98664	1.16246	0.892668	0.868166	0.977483	0.0667353
	0% Glc	2NM-PP1	2	0.0346743	0.0024202	0.0156696	0.146956	0.0499301	0.0330124
			3	0.0274076	0.00454128	0.0129289	0.0801416	0.0312548	0.0169661
			4	0.016037	0.00654277	0.0123242	0.0699217	0.0262064	0.0147021
			5	0.105125	0.135087	0.128586	0.106347	0.118786	0.00765464
			6	0.228366	0.432465	0.43429	0.171757	0.31672	0.0683377
			7	0.417443	0.450939	0.506173	0.260837	0.408848	0.0526189
			8	0.442764	0.610586	0.557187	0.336248	0.486696	0.0611572
			9	0.572544	0.832999	0.775827	0.371272	0.63816	0.105059
			10	0.594624	0.878051	0.77032	0.331772	0.643692	0.119255
			11	0.614414	0.67699	0.706175	0.390919	0.597124	0.0713502
			12	0.531966	0.871833	0.474944	0.393755	0.568124	0.105132
			15	0.380588	0.553406	0.463212	0.286658	0.420966	0.0570043

## Sheet: Fig. 1E
Figure 1E
Sch9-pThr737		Phospho	Tot	P/tot	Normalised
Replica 1	WT	13236.9	8095.27	1.63513	1
	reg1Δ	4298.23	4985.2	0.862198	0.527295
Replica 2	WT	14903.9	11310.1	1.31775	1
	reg1Δ	7766	7873.1	0.986398	0.748547
Replica 3	WT	14432.6	10581.8	1.36391	1
	reg1Δ	6478.59	6765.27	0.957625	0.702115
Replica 4	WT	12707	8779.51	1.44735	1
	reg1Δ	6156.59	6112.02	1.00729	0.695956
Sch9-pThr737		Replica 1	Replica 2	Replica 3	Replica 4	Average	SEM
Replica 1	WT	1	1	1	1	1	0
	reg1Δ	0.527295	0.748547	0.702115	0.695956	0.668478	0.0485028
Snf1-pThr210		Phospho	Tot	P/tot	Normalised
Replica 1	WT	812.234	3514.2	0.231129	1
	reg1Δ	4849.86	2267.96	2.13842	9.25208
Replica 2	WT	1203.77	6156.69	0.195522	1
	reg1Δ	7533.52	4454.74	1.69112	8.64927
Replica 3	WT	1067.77	5992.98	0.17817	1
	reg1Δ	6227.4	3529.2	1.76453	9.90364
Replica 4	WT	906.648	3506.5	0.258562	1
	reg1Δ	7009.93	3030.5	2.31313	8.94612
Snf1-pThr210		Replica 1	Replica 2	Replica 3	Replica 4	Average	SEM
Replica 1	WT	1	1	1	1	1	0
	reg1Δ	9.25208	8.64927	9.90364	8.94612	9.18778	0.268482
