# Supplementary material for: Snf1/AMPK fine-tunes TORC1 signaling in response to glucose starvation
Source: eLife. 2023 Feb 7;12:e84319. doi: 10.7554/eLife.84319 (PMC9937656; doi:10.7554/eLife.84319)
Supplement: Figure 2—source data 1. [file elife-84319-fig2-data1.xlsx]

## Sheet: Fig. 2B
Figure 2B
Replica 1				Sch9-pThr737	Tot Sch9	pSch9/total	Normalized
snf1-as	EXP			11870	9806.73	1.21039	1
	-N -C			133.192	6012.54	0.0221524	0.0183018
	+ 2% Glc	DMSO	1	1000.53	5760.3	0.173694	0.143502
			2	1598.6	6684.2	0.239161	0.19759
			5	65.95	5399.12	0.0122149	0.0100917
			10	317.678	8168.32	0.0388915	0.0321313
			15	140.192	5906.18	0.0237365	0.0196106
		2NM-PP1	1	1819.96	5756.83	0.31614	0.261188
			2	2180.74	6186.12	0.352521	0.291246
			5	265.899	5236.59	0.0507771	0.041951
			10	662.991	7304.83	0.0907606	0.0749845
			15	180.192	6200.12	0.0290626	0.0240109
Replica 2				Sch9-pThr737	Tot Sch9	pSch9/total	Normalized
snf1-as	EXP			10603.8	6961.71	1.52315	1
	-N -C			102.364	5447.3	0.0187917	0.0123374
	+ 2% Glc	DMSO	1	872.234	4407.59	0.197894	0.129924
			2	2343.86	4271.93	0.548665	0.360216
			5	114.364	3861	0.0296203	0.0194467
			10	179.021	2675.4	0.0669138	0.0439311
			15	83.364	3692.47	0.0225768	0.0148224
		2NM-PP1	1	1044.36	3480.64	0.300047	0.19699
			2	3748.69	6532.78	0.573828	0.376736
			5	276.607	6217.25	0.0444903	0.0292093
			10	355.778	6023.12	0.0590687	0.0387805
			15	181.778	6172.42	0.02945	0.0193349
Replica 2				Sch9-pThr737	Tot Sch9	pSch9/total	Normalized
snf1-as	EXP			10966.2	5924.71	1.85093	1
	-N -C			81.364	7718.42	0.0105415	0.00569526
	+ 2% Glc	DMSO	1	1689.5	8468.71	0.199499	0.107783
			2	3280.22	9696.9	0.338276	0.182759
			5	2.414	9989.9	0.000241644	0.000130552
			10	275.849	9928.37	0.0277839	0.0150108
			15	119.778	8921.47	0.0134258	0.00725354
		2NM-PP1	1	1875.62	9824.56	0.190911	0.103143
			2	3805.64	10772.6	0.353269	0.19086
			5	195.192	11460.7	0.0170314	0.00920155
			10	527.92	11518.9	0.0458308	0.0247609
			15	217.021	9725.9	0.0223137	0.0120554
Sch9-pThr737				Replica 1	Replica 2	Replica 3	Average	SEM
snf1-as	EXP			1	1	1	1	0
	-N -C			0.0183018	0.0123374	0.00569526	0.0121115	0.00364096
	+ 2% Glc	DMSO	1	0.143502	0.129924	0.107783	0.127069	0.0104096
			2	0.19759	0.360216	0.182759	0.246855	0.0568421
			5	0.0100917	0.0194467	0.000130552	0.00988965	0.005577
			10	0.0321313	0.0439311	0.0150108	0.0303577	0.00839554
			15	0.0196106	0.0148224	0.00725354	0.0138955	0.00359716
		2NM-PP1	1	0.261188	0.19699	0.103143	0.187107	0.0458904
			2	0.291246	0.376736	0.19086	0.286281	0.0537152
			5	0.041951	0.0292093	0.00920155	0.0267873	0.0095312
			10	0.0749845	0.0387805	0.0247609	0.0461753	0.0149623
			15	0.0240109	0.0193349	0.0120554	0.0184671	0.00347844

## Sheet: Fig. 2D
Figure 2D
Replica 1				Sch9-pThr737	Tot Sch9	pSch9/total	Normalized
snf1-as	EXP			11998.5	11215.2	1.06985	1
	-N -C			69.364	9569.83	0.00724819	0.00677497
	+ 2% Glc + 3.3mM Gln	DMSO	1	3738.47	11100.9	0.336773	0.314786
			2	8127	12073.6	0.673121	0.629174
			5	2403.86	13295.1	0.180808	0.169004
			10	3116.1	11323.6	0.275186	0.25722
			15	781.577	12021.7	0.0650137	0.0607691
		2NM-PP1	1	6532.42	12500.2	0.522584	0.488466
			2	7969.83	11902.2	0.66961	0.625893
			5	1950.03	9669.3	0.201673	0.188506
			10	3627.35	10189.7	0.355982	0.332741
			15	864.577	11586.6	0.0746185	0.0697468
Replica 2				Sch9-pThr737	Tot Sch9	pSch9/total	Normalized
snf1-as	EXP			10190	5292.05	1.92553	1
	-N -C			229.778	5633.52	0.0407877	0.0211826
	+ 2% Glc + 3.3mM Gln	DMSO	1	2779.45	6165.35	0.450818	0.234127
			2	6343.35	6422.71	0.987643	0.51292
			5	912.062	5868.47	0.155417	0.0807141
			10	2446.15	7618.95	0.321062	0.166739
			15	329.849	8577.54	0.038455	0.0199711
		2NM-PP1	1	4177.18	7826.71	0.533708	0.277175
			2	6012.76	9448.66	0.636361	0.330486
			5	876.355	6766.47	0.129514	0.0672617
			10	861.062	4824.88	0.178463	0.0926825
			15	116.778	6812.64	0.0171414	0.00890216
Replica 2				Sch9-pThr737	Tot Sch9	pSch9/total	Normalized
snf1-as	EXP			11016.2	7296.3	1.50984	1
	-N -C			163.192	10118.8	0.0161276	0.0106817
	+ 2% Glc + 3.3mM Gln	DMSO	1	2192.28	8369.37	0.26194	0.173489
			2	6063.3	9769.32	0.620647	0.411068
			5	827.234	9485.37	0.0872116	0.0577621
			10	3150.1	9671.9	0.325696	0.215716
			15	930.527	8850.25	0.105141	0.0696374
		2NM-PP1	1	2583.98	11359.2	0.227479	0.150664
			2	5908.59	7684.95	0.768852	0.509227
			5	888.648	7024.18	0.126513	0.0837921
			10	2554.33	9054.2	0.282115	0.186851
			15	542.749	8652.78	0.0627254	0.0415444
Sch9-pThr737				Replica 1	Replica 2	Replica 3	Average	SEM
snf1-as	EXP			1	1	1	1	0
	-N -C			0.00677497	0.0211826	0.0106817	0.0128797	0.00430187
	+ 2% Glc + 3.3mM Gln	DMSO	1	0.314786	0.234127	0.173489	0.2408	0.0409252
			2	0.629174	0.51292	0.411068	0.517721	0.0630077
			5	0.169004	0.0807141	0.0577621	0.102493	0.0339088
			10	0.25722	0.166739	0.215716	0.213225	0.0261491
			15	0.0607691	0.0199711	0.0696374	0.0501259	0.0152932
		2NM-PP1	1	0.488466	0.277175	0.150664	0.305435	0.0985333
			2	0.625893	0.330486	0.509227	0.488535	0.0859017
			5	0.188506	0.0672617	0.0837921	0.113187	0.0379608
			10	0.332741	0.0926825	0.186851	0.204091	0.069833
			15	0.0697468	0.00890216	0.0415444	0.0400644	0.0175799

## Sheet: Fig. 2F
Figure 2F
Replica 1				Sch9-pThr737	Tot Sch9	pSch9/total	Normalized
snf1-as	EXP			20257.9	9206.49	2.20039	1
	-N -C			3947.79	7997.25	0.493644	0.224343
	+ 3.3mM Gln	DMSO	1	2678.72	7730.95	0.346493	0.157468
			2	3262.79	7055.54	0.462444	0.210164
			5	5045.52	10220	0.493689	0.224364
			10	3094.72	6940.54	0.44589	0.202641
			15	3284.08	9869.8	0.33274	0.151219
		2NM-PP1	1	2199.48	7772.25	0.282991	0.128609
			2	3499.74	7593.12	0.460909	0.209467
			5	6229.42	8495.32	0.733277	0.333248
			10	4089.52	8860.49	0.461545	0.209756
			15	3994.1	8288.61	0.481879	0.218997
Replica 2				Sch9-pThr737	Tot Sch9	pSch9/total	Normalized
snf1-as	EXP			15289.8	11447.5	1.33565	1
	-N -C			56.83	9996.09	0.00568522	0.00425652
	+ 3.3mM Gln	DMSO	1	78.269	9072.85	0.00862672	0.00645882
			2	152.874	9793.8	0.0156093	0.0116866
			5	208.66	9609.51	0.0217139	0.0162572
			10	92.259	8309.39	0.011103	0.00831279
			15	205.788	8855.8	0.0232376	0.017398
		2NM-PP1	1	779.577	9050.27	0.0861386	0.0644918
			2	1756.28	10660.9	0.16474	0.12334
			5	3068.3	10767	0.284971	0.213357
			10	1543.38	10967.3	0.140725	0.105361
			15	1371.5	9902.39	0.138502	0.103696
Replica 2				Sch9-pThr737	Tot Sch9	pSch9/total	Normalized
snf1-as	EXP			11746.2	5415.76	2.1689	1
	-N -C			668.92	8190.05	0.0816747	0.0376572
	+ 3.3mM Gln	DMSO	1	138.192	8220.47	0.0168107	0.0077508
			2	133.778	7608.05	0.0175837	0.00810721
			5	328.506	9569.23	0.0343294	0.015828
			10	378.678	9817.88	0.0385702	0.0177833
			15	452.263	9189.35	0.049216	0.0226917
		2NM-PP1	1	564.163	9824.05	0.0574267	0.0264773
			2	2301.69	10222.5	0.225158	0.103812
			5	3332.3	8654.3	0.385045	0.17753
			10	1896.33	9371.59	0.202348	0.0932954
			15	660.335	8506.25	0.0776294	0.0357921
Sch9-pThr737				Replica 1	Replica 2	Replica 3	Average	SEM
snf1-as	EXP			1	1	1	1	0
	-N -C			0.00425652	0.00328021	0.0376572	0.0150646	0.0112998
	+ 3.3mM Gln	DMSO	1	0.00645882	0.00568313	0.0077508	0.00663092	0.000603057
			2	0.0116866	0.0110584	0.00810721	0.0102841	0.00110344
			5	0.0162572	0.0156498	0.015828	0.0159117	0.000180238
			10	0.00831279	0.00588842	0.0177833	0.0106615	0.00362903
			15	0.017398	0.0146786	0.0226917	0.0182561	0.00235263
		2NM-PP1	1	0.0644918	0.0173708	0.0264773	0.0361133	0.0144307
			2	0.12334	0.0631713	0.103812	0.0967746	0.0177221
			5	0.213357	0.176278	0.17753	0.189055	0.0121565
			10	0.105361	0.0837142	0.0932954	0.0941235	0.00626256
			15	0.103696	0.107695	0.0357921	0.0823945	0.0233298
