# Supplementary material for: Snf1/AMPK fine-tunes TORC1 signaling in response to glucose starvation
Source: eLife. 2023 Feb 7;12:e84319. doi: 10.7554/eLife.84319 (PMC9937656; doi:10.7554/eLife.84319)
Supplement: Figure 3—figure supplement 1—source data 1. [file elife-84319-fig3-figsupp1-data1.xlsx]

## Sheet: Figure 3–figure supplement 1C
Figure 3–figure supplement 1C
Replica 1			Sch9-pThr737	Tot Sch9	pSch9/total	Normalized
snf1-as	2% Glc	EXP	10206.9	10120	1.00858	1
	0% Glc 10'	DMSO	2306.03	8862.32	0.260207	0.257992
		2NM-PP1	4903.07	11362.1	0.431529	0.427856
snf1-as lst4Δ	2% Glc	EXP	5236.42	8198.02	0.638741	0.633305
	0% Glc 10'	DMSO	2429.96	9547.39	0.254516	0.252349
		2NM-PP1	3324.4	7461.78	0.445523	0.441731
Replica 2			Sch9-pThr737	Tot Sch9	pSch9/total	Normalized
snf1-as	2% Glc	EXP	11197.3	8008.02	1.39826	1
	0% Glc 10'	DMSO	3284.59	8434.73	0.389412	0.278499
		2NM-PP1	5580.07	8119.44	0.687249	0.491504
snf1-as lst4Δ	2% Glc	EXP	6678.95	9144.97	0.730341	0.522323
	0% Glc 10'	DMSO	3018.86	8765.68	0.344395	0.246304
		2NM-PP1	4658	8427.27	0.55273	0.3953
Replica 3			Sch9-pThr737	Tot Sch9	pSch9/total	Normalized
snf1-as	2% Glc	EXP	7535.95	5399.12	1.39577	1
	0% Glc 10'	DMSO	2608.98	5981.61	0.436167	0.312492
		2NM-PP1	5166.42	6550.37	0.788722	0.565079
snf1-as lst4Δ	2% Glc	EXP	3093.33	6235.54	0.49608	0.355416
	0% Glc 10'	DMSO	2037.5	6083.66	0.334913	0.239948
		2NM-PP1	3245.81	6119.49	0.530406	0.380008
Sch9-pThr737			Replica 1	Replica 2	Replica 3	Average	SEM
snf1-as	2% Glc	EXP	1	1	1	1	0
	0% Glc 10'	DMSO	0.257992	0.278499	0.312492	0.282994	0.0158925
		2NM-PP1	0.427856	0.491504	0.565079	0.494813	0.0396473
snf1-as lst4Δ	2% Glc	EXP	0.633305	0.522323	0.355416	0.503681	0.0807593
	0% Glc 10'	DMSO	0.252349	0.246304	0.239948	0.2462	0.00358036
		2NM-PP1	0.441731	0.3953	0.380008	0.40568	0.0185583
