# Supplementary material for: Snf1/AMPK fine-tunes TORC1 signaling in response to glucose starvation
Source: eLife. 2023 Feb 7;12:e84319. doi: 10.7554/eLife.84319 (PMC9937656; doi:10.7554/eLife.84319)
Supplement: Figure 4—source data 1. [file elife-84319-fig4-data1.xlsx]

## Sheet: Fig. 4B
Figure 4B
Pib2-Ser268 (fold change)			Replica 1	Replica 2	Replica 3	Replica 4	Replica 5	Average	SD
2% Glc	Exp		0	0	0	0	0	1	0
0.05% Glc	DMSO	5 min	2.22361	1.42416	3.10919	2.4816	2.39251	5.01488	2.14401
		15 min	1.98893	1.19886	2.30315	2.66825	2.49118	4.3774	1.57677
2% Glc	Exp		0	0	0	0	0	1	0
0.05% Glc	2NM-PP1	5 min	-0.167097	-0.0132727	0.146139	0.591073	-0.0395629	1.07434	0.24334
		15 min	-0.425315	0.294339	-0.532252	0.621793	-0.0710209	0.984531	0.353378

## Sheet: Fig. 4C
Figure 4C
Pib2-Ser309 (fold change)			Replica 1	Replica 2	Replica 3	Replica 4	Replica 5	Average	SD
2% Glc	Exp		0	0	0	0	0	1	0
0.05% Glc	DMSO	5 min	1.11205	0.90437	0.672625	0.962102	1.15313	1.94646	0.251096
		15 min	1.27917	1.35872	0.746287	1.33326	1.67832	2.42696	0.541934
2% Glc	Exp		0	0	0	0	0	1	0
0.05% Glc	2NM-PP1	5 min	-0.463374	-1.085	-1.26871	-0.711012	-0.847039	0.545244	0.121142
		15 min	0.325179	0.229693	0.0518694	0.634687	0.5561	1.28299	0.212483

## Sheet: Fig. 4D
Figure 4D
Replica 1	32P	SyR	32P/SyR	Normalized
Pib2	78861.3	45201.7	1.74466	1
pib2-S268A	72328.2	48538.8	1.49011	0.8541
pib2-S309A	42059.5	38580.2	1.09018	0.62487
pib2-SASA	25612.6	37812.5	0.67736	0.388248
Replica 2	32P	SyR	32P/SyR	Normalized
Pib2	37678.6	30745.1	1.22551	1
pib2-S268A	32411.2	27895.1	1.1619	0.94809
pib2-S309A	31363.7	36310.6	0.863762	0.704817
pib2-SASA	11008.8	28429	0.387239	0.315981
Replica 3	32P	SyR	32P/SyR	Normalized
Pib2	38818.9	29249.5	1.32716	1
pib2-S268A	36841.3	26613.7	1.3843	1.04305
pib2-S309A	32371.8	35034.6	0.923995	0.696217
pib2-SASA	10551	27385.5	0.385276	0.2903
32P/SyR	Replica 1	Replica 2	Replica 3	Average	SEM
Pib2	1	1	1	1	0
pib2-S268A	0.8541	0.94809	1.04305	0.948413	0.0545449
pib2-S309A	0.62487	0.704817	0.696217	0.675301	0.0253374
pib2-SASA	0.388248	0.315981	0.2903	0.33151	0.0293219

## Sheet: Fig. 4E
Figure 4E
Pib2-221-635 [M]	Fraction Bound	SEM
2.76489e-10	-0.263653	0.0871199
5.52979e-10	-0.0204915	0.0524341
1.10596e-09	0.0213318	0.153772
2.21191e-09	-0.0262482	0.242387
4.42383e-09	-0.00922559	0.0152675
8.84766e-09	0.0995263	0.0670699
1.76953e-08	0.110836	0.086962
3.53906e-08	0.174663	0.114566
7.07812e-08	0.235759	0.189798
1.41562e-07	0.504976	0.140474
2.83125e-07	0.0458846	0.345688
5.6625e-07	0.599402	0.146019
1.1325e-06	0.766117	0.0662284
2.265e-06	0.893447	0.146424
4.53e-06	0.898768	0.326079
9.06e-06	0.950912	0

## Sheet: Fig. 4G
Figure 4G
Replica 1			Sch9-pThr737	Tot Sch9	pSch9/total	Normalized
snf1-as	2% Glc	EXP	9358.78	7982.02	1.17248	1
	0% Glc 10'	DMSO	1585.26	4880.83	0.324792	0.277012
		2NM-PP1	6043.83	6585.78	0.917709	0.782706
snf1-as pib2Δ	2% Glc	EXP	6676.42	6431.18	1.03813	0.885415
	0% Glc 10'	DMSO	1113.58	6669.83	0.166957	0.142396
		2NM-PP1	5326.12	7919.78	0.672509	0.573577
snf1-as pib2-SASA	2% Glc	EXP	12091.8	7561.78	1.59907	1.36383
	0% Glc 10'	DMSO	1843.5	5615.83	0.328268	0.279977
		2NM-PP1	5528.42	5185.54	1.06612	0.909286
snf1-as pib2-SESE	2% Glc	EXP	10772.4	5903.25	1.82482	1.55637
	0% Glc 10'	DMSO	1255.11	4995.88	0.25123	0.214271
		2NM-PP1	1309.06	2987.81	0.438134	0.373681
Replica 2			Sch9-pThr737	Tot Sch9	pSch9/total	Normalized
snf1-as	2% Glc	EXP	10059.4	4537.54	2.21694	1
	0% Glc 10'	DMSO	2617.98	3578.88	0.731509	0.329964
		2NM-PP1	8355.27	5876.07	1.42191	0.641386
snf1-as pib2Δ	2% Glc	EXP	9253.56	6770.54	1.36674	0.616499
	0% Glc 10'	DMSO	847.506	4606.76	0.18397	0.0829839
		2NM-PP1	3040.52	5170.54	0.588047	0.265252
snf1-as pib2-SASA	2% Glc	EXP	14836.8	6494.25	2.28461	1.03052
	0% Glc 10'	DMSO	3035.05	5463.54	0.555511	0.250576
		2NM-PP1	3211.59	5720.95	0.561373	0.25322
snf1-as pib2-SESE	2% Glc	EXP	13863	6978.78	1.98645	0.896032
	0% Glc 10'	DMSO	2319.67	7302.2	0.317667	0.143291
		2NM-PP1	1386.94	4701.83	0.294979	0.133057
Replica 3			Sch9-pThr737	Tot Sch9	pSch9/total	Normalized
snf1-as	2% Glc	EXP	11440.6	8577.85	1.33374	1
	0% Glc 10'	DMSO	2945.76	9911.8	0.297197	0.22283
		2NM-PP1	7819.39	9030.85	0.865853	0.649191
snf1-as pib2Δ	2% Glc	EXP	6952.9	7677.2	0.905657	0.679035
	0% Glc 10'	DMSO	1262.16	8140.73	0.155043	0.116247
		2NM-PP1	3203.64	6929.61	0.462312	0.346628
snf1-as pib2-SASA	2% Glc	EXP	10736.7	7881.61	1.36224	1.02137
	0% Glc 10'	DMSO	3297.42	5211.2	0.632756	0.474422
		2NM-PP1	6133.2	5242.71	1.16985	0.877121
snf1-as pib2-SESE	2% Glc	EXP	8746.61	6775.61	1.2909	0.967877
	0% Glc 10'	DMSO	1171.99	7082.9	0.165468	0.124063
		2NM-PP1	1375.65	6556.61	0.209811	0.15731
Replica 4			Sch9-pThr737	Tot Sch9	pSch9/total	Normalized
snf1-as	2% Glc	EXP	11672.2	10505	1.11111	1
	0% Glc 10'	DMSO	2837.76	10103.1	0.28088	0.252792
		2NM-PP1	7002.78	8232.32	0.850645	0.765581
snf1-as pib2Δ	2% Glc	EXP	8726.49	8970.32	0.972818	0.875536
	0% Glc 10'	DMSO	963.749	7951.2	0.121208	0.109087
		2NM-PP1	2564.45	6422.54	0.399289	0.35936
snf1-as pib2-SASA	2% Glc	EXP	13371.7	9466.78	1.41248	1.27124
	0% Glc 10'	DMSO	4432.61	11345.1	0.390707	0.351636
		2NM-PP1	7314.56	8004.78	0.913774	0.822396
snf1-as pib2-SESE	2% Glc	EXP	8915.49	6716.95	1.32731	1.19458
	0% Glc 10'	DMSO	1257.65	7217.49	0.17425	0.156825
		2NM-PP1	1436.6	5865.37	0.244929	0.220436
Sch9-pThr737			Replica 1	Replica 2	Replica 3	Replica 4	Average	SEM
snf1-as	2% Glc	EXP	1	1	1	1	1	0
	0% Glc 10'	DMSO	0.277012	0.329964	0.22283	0.252792	0.27065	0.0226647
		2NM-PP1	0.782706	0.641386	0.649191	0.765581	0.709716	0.037395
snf1-as pib2Δ	2% Glc	EXP	0.885415	0.616499	0.679035	0.875536	0.764121	0.068409
	0% Glc 10'	DMSO	0.142396	0.0829839	0.116247	0.109087	0.112679	0.0122153
		2NM-PP1	0.573577	0.265252	0.346628	0.35936	0.386204	0.0658439
snf1-as pib2-SASA	2% Glc	EXP	1.36383	1.03052	1.02137	1.27124	1.17174	0.0862893
	0% Glc 10'	DMSO	0.279977	0.250576	0.474422	0.351636	0.339153	0.0498342
		2NM-PP1	0.909286	0.25322	0.877121	0.822396	0.715506	0.155135
snf1-as pib2-SESE	2% Glc	EXP	1.55637	0.896032	0.967877	1.19458	1.15372	0.148532
	0% Glc 10'	DMSO	0.214271	0.143291	0.124063	0.156825	0.159613	0.0194198
		2NM-PP1	0.373681	0.133057	0.15731	0.220436	0.221121	0.0540849

## Sheet: Fig. 4H
Figure 4H
Replica 1	HA	myc	HA/myc	Normalized
KOG1-HA Pib2-myc	5190.83	9458.75	0.548786	1
KOG1-HA pib2-SASA-myc	3969.3	10392.6	0.381937	0.695966
KOG1-HA pib2-SESE-Myc	1206.13	6212.15	0.194157	0.353794
Replica 2	HA	myc	HA/myc	Normalized
KOG1-HA Pib2-myc	1090.31	4901.95	0.222423	1
KOG1-HA pib2-SASA-myc	946.77	6552.44	0.144491	0.649625
KOG1-HA pib2-SESE-Myc	743.891	6440.32	0.115505	0.519306
Replica 3	HA	myc	HA/myc	Normalized
KOG1-HA Pib2-myc	2524.64	9069.97	0.278351	1
KOG1-HA pib2-SASA-myc	4301.83	9059.51	0.474842	1.70591
KOG1-HA pib2-SESE-Myc	1659.2	10020.8	0.165577	0.594848
Replica 4	HA	myc	HA/myc	Normalized
KOG1-HA Pib2-myc	4516.1	10798	0.418236	1
KOG1-HA pib2-SASA-myc	5305.05	8698.15	0.609906	1.45828
KOG1-HA pib2-SESE-Myc	2986.38	8528.8	0.350152	0.837211
Kog1-HA/Pib2-myc	Replica 1	Replica 2	Replica 3	Replica 4	Average	SEM
KOG1-HA Pib2-myc	1	1	1	1	1	0
KOG1-HA pib2-SASA-myc	0.695966	0.649625	1.70591	1.45828	1.12744	0.267482
KOG1-HA pib2-SESE-Myc	0.353794	0.519306	0.594848	0.837211	0.57629	0.100489

## Sheet: Fig. 4I
Figure 4I
Replica 1	myc	Adh1	myc/Adh1	Normalized
snf1-as Pib2-myc	10696.3	8371.88	1.27764	1
snf1-as pib2-SASA-myc	10316.6	9135.12	1.12933	0.883917
snf1-as pib2-SESE-Myc	11028.5	8388.4	1.31473	1.02903
Replica 2	myc	Adh1	myc/Adh1	Normalized
snf1-as Pib2-myc	12565.5	11190.8	1.12284	1
snf1-as pib2-SASA-myc	13066.6	10655.2	1.2263	1.09215
snf1-as pib2-SESE-Myc	11681	8569.59	1.36308	1.21396
Replica 3	myc	Adh1	myc/Adh1	Normalized
snf1-as Pib2-myc	9619.9	9291.88	1.0353	1
snf1-as pib2-SASA-myc	10898.2	10542.5	1.03373	0.998484
snf1-as pib2-SESE-Myc	9009.68	8213.17	1.09698	1.05957
Pib2-myc/Adh1	Replica 1	Replica 2	Replica 3	Replica 4	Average	SEM
snf1-as Pib2-myc	1	1	1	1	0	0
snf1-as pib2-SASA-myc	0.883917	1.09215	0.998484	0.991517	0.104292	0.0602128
snf1-as pib2-SESE-Myc	1.02903	1.21396	1.05957	1.10086	0.099137	0.0572368
