# Supplementary material for: Snf1/AMPK fine-tunes TORC1 signaling in response to glucose starvation
Source: eLife. 2023 Feb 7;12:e84319. doi: 10.7554/eLife.84319 (PMC9937656; doi:10.7554/eLife.84319)
Supplement: Figure 5—source data 1. [file elife-84319-fig5-data1.xlsx]

## Sheet: Fig. 5B
Figure 5B.
Sch9-Ser288 (fold change)			Replica 1	Replica 2	Replica 3	Replica 4	Replica 5	Average	SD
2% Glc	Exp		0	0	0	0	0	1	0
0.05% Glc	DMSO	5 min	2.22361	1.42416	3.10919	2.4816	2.39251	5.01488	2.14401
		15 min	1.98893	1.19886	2.30315	2.66825	2.49118	4.3774	1.57677
2% Glc	Exp		0	0	0	0	0	1	0
0.05% Glc	2NM-PP1	5 min	-0.167097	-0.0132727	0.146139	0.591073	-0.0395629	1.07434	0.24334
		15 min	-0.425315	0.294339	-0.532252	0.621793	-0.0710209	0.984531	0.353378

## Sheet: Fig. 5C
Figure 5C.
Replica 1	32P	SyR	32P/SyR	Normalized
Sch9	4535.97	14161.3	0.320309	1
sch9-S288A	757.548	13623.8	0.0556049	0.173598
Replica 2	32P	SyR	32P/SyR	Normalized
Sch9	2472.79	10127.6	0.244163	1
sch9-S288A	412.012	11959.5	0.0344506	0.141096
Replica 3	32P	SyR	32P/SyR	Normalized
Sch9	4552.78	10644.5	0.427712	1
sch9-S288A	787.82	9211.72	0.0855236	0.199956
32P/SyR	Replica 1	Replica 2	Replica 3	Average	SEM
Sch9	1	1	1	1	0
sch9-S288A	0.173598	0.141096	0.199956	0.17155	0.0170221

## Sheet: Fig. 5E
Figure 5E.
Sch9-1-394 [M]	Fraction Bound	SEM
3.598e-12	-0.222963	0.0982715
7.196e-12	-0.0926507	0.275512
1.4392e-11	-0.250805	0.126807
2.8784e-11	-0.153884	0.26088
5.7568e-11	0.0369335	0.0814798
1.15137e-10	-0.0374411	0.0553
2.30273e-10	0.123144	0.077687
4.60547e-10	0.133488	0.248291
9.21094e-10	0.248588	0.188275
1.84219e-09	0.176594	0.11624
3.68438e-09	0.363761	0.0424299
7.36875e-09	0.434162	0.0930694
1.47375e-08	0.624314	0.141704
2.9475e-08	0.771423	0.195998
5.895e-08	0.97793	0.283936
1.179e-07	0.963791	0.235429

## Sheet: Fig. 5G
Figure 5G.
Replica 1			Sch9-pThr737	Tot Sch9	pSch9/total	Normalized
snf1-as	2% Glc	EXP	10201.7	10450.1	0.976233	1
	0% Glc 10'	DMSO	1859.13	8426.54	0.220628	0.226
		2NM-PP1	4291.76	9759.32	0.43976	0.450466
snf1-as sch9-S288A	2% Glc	EXP	8588.12	9198.66	0.933628	0.956357
	0% Glc 10'	DMSO	1840.6	7129.54	0.258165	0.26445
		2NM-PP1	3915.4	7329.95	0.534164	0.547168
snf1-as sch9-S288E	2% Glc	EXP	7110.54	9821.32	0.72399	0.741616
	0% Glc 10'	DMSO	1376.65	9480.25	0.145212	0.148748
		2NM-PP1	3002.69	10134.6	0.296281	0.303494
Replica 2			Sch9-pThr737	Tot Sch9	pSch9/total	Normalized
snf1-as	2% Glc	EXP	5868.1	7739.12	0.758239	1
	0% Glc 10'	DMSO	1380.65	8631.95	0.159946	0.210944
		2NM-PP1	4080.52	9157.78	0.445579	0.58765
snf1-as sch9-S288A	2% Glc	EXP	6435.83	11401.1	0.56449	0.744475
	0% Glc 10'	DMSO	1197.23	9939.08	0.120457	0.158865
		2NM-PP1	3289.4	12080.3	0.272294	0.359114
snf1-as sch9-S288E	2% Glc	EXP	7152.59	11331.7	0.6312	0.832456
	0% Glc 10'	DMSO	1186.87	8692.25	0.136544	0.18008
		2NM-PP1	3549.05	9818.71	0.361458	0.476708
Replica 3			Sch9-pThr737	Tot Sch9	pSch9/total	Normalized
snf1-as	2% Glc	EXP	6766.52	8924.61	0.758186	1
	0% Glc 10'	DMSO	1435.13	8792.02	0.163231	0.215292
		2NM-PP1	5600.69	11309.7	0.495212	0.653153
snf1-as sch9-S288A	2% Glc	EXP	9669.69	12364.4	0.78206	1.03149
	0% Glc 10'	DMSO	1848.08	11241.3	0.164402	0.216835
		2NM-PP1	3114.98	7262.95	0.428887	0.565674
snf1-as sch9-S288E	2% Glc	EXP	8343.4	10187.6	0.818975	1.08018
	0% Glc 10'	DMSO	777.991	11183.4	0.0695668	0.0917542
		2NM-PP1	2961.74	11414.8	0.259464	0.342217
Replica 4			Sch9-pThr737	Tot Sch9	pSch9/total	Normalized
snf1-as	2% Glc	EXP	11381.9	11678.1	0.97463	1
	0% Glc 10'	DMSO	1921.33	8669.71	0.221614	0.227382
		2NM-PP1	5639.71	10877	0.518498	0.531994
snf1-as sch9-S288A	2% Glc	EXP	11027.9	12229	0.901785	0.925258
	0% Glc 10'	DMSO	1819.2	9075.78	0.200446	0.205664
		2NM-PP1	4764.66	8590.02	0.554674	0.569112
snf1-as sch9-S288E	2% Glc	EXP	8397.66	8569.66	0.979929	1.00544
	0% Glc 10'	DMSO	1152.23	8752.78	0.131642	0.135069
		2NM-PP1	4536.88	10244.1	0.442876	0.454404
Replica 5			Sch9-pThr737	Tot Sch9	pSch9/total	Normalized
snf1-as	2% Glc	EXP	8790.12	6831.25	1.28675	1
	0% Glc 10'	DMSO	1744.79	8391.73	0.207918	0.161583
		2NM-PP1	4790.12	7501.49	0.638557	0.496254
snf1-as sch9-S288A	2% Glc	EXP	9500.54	8135.2	1.16783	0.90758
	0% Glc 10'	DMSO	1700.01	6238.2	0.272517	0.211786
		2NM-PP1	4531	7243	0.62557	0.486162
snf1-as sch9-S288E	2% Glc	EXP	6538.3	5816.54	1.12409	0.873584
	0% Glc 10'	DMSO	1737.01	8490.61	0.20458	0.15899
		2NM-PP1	3442.93	7188.71	0.478936	0.372205
Replica 6			Sch9-pThr737	Tot Sch9	pSch9/total	Normalized
snf1-as	2% Glc	EXP	9219.02	6731	1.36964	1
	0% Glc 10'	DMSO	1607.01	6478.42	0.248056	0.181111
		2NM-PP1	3362.83	7867.66	0.427425	0.312072
snf1-as sch9-S288A	2% Glc	EXP	12411.2	9784.02	1.26852	0.926172
	0% Glc 10'	DMSO	1819.26	7634.12	0.238306	0.173992
		2NM-PP1	3739.25	7732.95	0.483547	0.353048
snf1-as sch9-S288E	2% Glc	EXP	8195.44	6669	1.22889	0.897235
	0% Glc 10'	DMSO	1095.99	6975.54	0.157119	0.114716
		2NM-PP1	1672.01	5453.64	0.306586	0.223845
Sch9-pThr737			Replica 1	Replica 2	Replica 3	Replica 4	Replica 5	Replica 6	Average	SEM
snf1-as	2% Glc	EXP	1	1	1	1	1	1	1	0
	0% Glc 10'	DMSO	0.226	0.210944	0.215292	0.227382	0.161583	0.181111	0.203719	0.010846
		2NM-PP1	0.450466	0.58765	0.653153	0.531994	0.496254	0.312072	0.505265	0.0482288
snf1-as sch9-S288A	2% Glc	EXP	0.956357	0.744475	1.03149	0.925258	0.90758	0.926172	0.915222	0.038576
	0% Glc 10'	DMSO	0.26445	0.158865	0.216835	0.205664	0.211786	0.173992	0.205265	0.015067
		2NM-PP1	0.547168	0.359114	0.565674	0.569112	0.486162	0.353048	0.480046	0.0410532
snf1-as sch9-S288E	2% Glc	EXP	0.741616	0.832456	1.08018	1.00544	0.873584	0.897235	0.905084	0.0495911
	0% Glc 10'	DMSO	0.148748	0.18008	0.0917542	0.135069	0.15899	0.114716	0.138226	0.0129304
		2NM-PP1	0.303494	0.476708	0.342217	0.454404	0.372205	0.223845	0.362146	0.0386011
