# Supplementary material for: Snf1/AMPK fine-tunes TORC1 signaling in response to glucose starvation
Source: eLife. 2023 Feb 7;12:e84319. doi: 10.7554/eLife.84319 (PMC9937656; doi:10.7554/eLife.84319)
Supplement: Figure 6—source data 1. [file elife-84319-fig6-data1.xlsx]

## Sheet: Fig. 6B
Figure 6B
Replica 1			Sch9-pThr737	Tot Sch9	pSch9/total	Normalized
snf1-as	Exp		5585.88	9964.51	0.560578	1
	-C	DMSO	1125.06	8557.2	0.131476	0.234536
snf1-as sch9-S288A	Exp		5067.47	10062.2	0.503613	0.898383
	-C	DMSO	1047.82	9958.92	0.105214	0.187689
snf1-as sch9-S288E	Exp		5511.3	10794.3	0.510573	0.910798
	-C	DMSO	929.577	10014.7	0.092821	0.165581
snf1-as pib2-SASA	Exp		4533	10826.7	0.418688	0.746887
	-C	DMSO	1343.72	10149.9	0.132388	0.236164
snf1-as pib2-SESE	Exp		5393.18	10285	0.524374	0.935418
	-C	DMSO	645.263	8999.08	0.0717033	0.12791
snf1-as pib2-SASA sch9-S288A	Exp		5306.42	10002.2	0.530524	0.946388
	-C	DMSO	1329.31	9314.61	0.142712	0.25458
snf1-as pib2-SESE sch9-S288E	Exp		4504.47	10005.7	0.450191	0.803084
	-C	DMSO	362.607	7808.66	0.0464365	0.0828369
snf1-as	Exp		4569.59	10202.1	0.447905	1
	-C	2NM-PP1	2433.1	9734.39	0.249949	0.558041
snf1-as sch9-S288A	Exp		4664.71	9360.27	0.498352	1.11263
	-C	2NM-PP1	2710.64	9275.56	0.292235	0.652448
snf1-as sch9-S288E	Exp		4492.88	10046.9	0.447193	0.998411
	-C	2NM-PP1	2034.28	10184	0.199753	0.445971
snf1-as pib2-SASA	Exp		4398.3	10722.6	0.410191	0.915799
	-C	2NM-PP1	2761.35	9836.56	0.280723	0.626747
snf1-as pib2-SESE	Exp		4677.3	9395.85	0.497804	1.11141
	-C	2NM-PP1	1124.48	9292.61	0.121008	0.270164
snf1-as pib2-SASA sch9-S288A	Exp		4525.18	9060.44	0.499443	1.11507
	-C	2NM-PP1	2750.98	9945.32	0.276611	0.617566
snf1-as pib2-SESE sch9-S288E	Exp		3700.18	9762.9	0.379004	0.84617
	-C	2NM-PP1	546.021	6187	0.0882529	0.197035
Replica 2			Sch9-pThr737	Tot Sch9	pSch9/total	Normalized
snf1-as	Exp		4844.88	6511.07	0.744099	1
	-C	DMSO	1238.48	7141.9	0.17341	0.233047
snf1-as sch9-S288A	Exp		6141.71	8010.32	0.766725	1.03041
	-C	DMSO	1298.43	8460.02	0.153478	0.20626
snf1-as sch9-S288E	Exp		4865.59	8177.32	0.59501	0.799639
	-C	DMSO	927.577	8489.44	0.109262	0.146839
snf1-as pib2-SASA	Exp		8876.12	9791.32	0.90653	1.21829
	-C	DMSO	1517.38	9862.44	0.153854	0.206766
snf1-as pib2-SESE	Exp		6598	9503.73	0.694254	0.933014
	-C	DMSO	659.506	9015.61	0.0731516	0.098309
snf1-as pib2-SASA sch9-S288A	Exp		6774	11244.3	0.602441	0.809625
	-C	DMSO	1424.13	10611.7	0.134204	0.180358
snf1-as pib2-SESE sch9-S288E	Exp		5540.88	10123.7	0.547316	0.735543
	-C	DMSO	334.607	6908.95	0.0484309	0.0650867
snf1-as	Exp		4868.71	5338.3	0.912035	1
	-C	2NM-PP1	2527.52	5751.18	0.439479	0.481866
snf1-as sch9-S288A	Exp		5922.71	6391.47	0.926659	1.01603
	-C	2NM-PP1	3746.88	6650.71	0.563381	0.617718
snf1-as sch9-S288E	Exp		5455	6903	0.790236	0.866454
	-C	2NM-PP1	2583.22	7032.83	0.367309	0.402736
snf1-as pib2-SASA	Exp		7902.54	8134.25	0.971515	1.06522
	-C	2NM-PP1	3234.47	7577.54	0.426849	0.468019
snf1-as pib2-SESE	Exp		3128.81	7198.42	0.434653	0.476575
	-C	2NM-PP1	892.284	6986.71	0.127712	0.140029
snf1-as pib2-SASA sch9-S288A	Exp		6696.25	8702.66	0.769448	0.843661
	-C	2NM-PP1	2703.93	8292.95	0.326052	0.357499
snf1-as pib2-SESE sch9-S288E	Exp		5096.42	7568	0.673416	0.738367
	-C	2NM-PP1	567.678	6868.12	0.082654	0.0906259
Replica 3			Sch9-pThr737	Tot Sch9	pSch9/total	Normalized
snf1-as	Exp		3894.47	8412.73	0.462926	1
	-C	DMSO	1206.89	8987.12	0.134291	0.290092
snf1-as sch9-S288A	Exp		6432.83	8860.15	0.726041	1.56838
	-C	DMSO	959.577	5660	0.169536	0.366228
snf1-as sch9-S288E	Exp		4613.3	6443.9	0.715916	1.5465
	-C	DMSO	853.749	8834.44	0.0966387	0.208757
snf1-as pib2-SASA	Exp		9066.95	10488.8	0.864441	1.86734
	-C	DMSO	1189.31	8029.95	0.148109	0.31994
snf1-as pib2-SESE	Exp		4768.59	7735.37	0.616466	1.33167
	-C	DMSO	431.192	7165.25	0.0601783	0.129996
snf1-as pib2-SASA sch9-S288A	Exp		5867.54	9133.68	0.642407	1.38771
	-C	DMSO	1164.65	8598.49	0.135448	0.292591
snf1-as pib2-SESE sch9-S288E	Exp		6592.12	9513.61	0.692915	1.49682
	-C	DMSO	546.021	6178.54	0.0883738	0.190903
snf1-as	Exp		5593	7529.49	0.742813	1
	-C	2NM-PP1	3715.59	8494.8	0.437396	0.588837
snf1-as sch9-S288A	Exp		7192.83	9166.09	0.784722	1.05642
	-C	2NM-PP1	3134.93	6928.9	0.452443	0.609094
snf1-as sch9-S288E	Exp		4741.05	7759.97	0.610963	0.822498
	-C	2NM-PP1	2412.4	6934.25	0.347896	0.468349
snf1-as pib2-SASA	Exp		8847.12	9553.44	0.926067	1.2467
	-C	2NM-PP1	4002.76	6864.2	0.583136	0.785037
snf1-as pib2-SESE	Exp		4162.76	5474.12	0.760443	1.02373
	-C	2NM-PP1	992.406	5354.88	0.185327	0.249494
snf1-as pib2-SASA sch9-S288A	Exp		5667.88	5949.71	0.952631	1.28246
	-C	2NM-PP1	3367.47	5719.42	0.588778	0.792633
snf1-as pib2-SESE sch9-S288E	Exp		6342.12	7837.02	0.809252	1.08944
	-C	2NM-PP1	632.678	4690.3	0.134891	0.181595
Replica 4			Sch9-pThr737	Tot Sch9	pSch9/total	Normalized
snf1-as	Exp		5609.18	8905.9	0.629827	1
	-C	DMSO	931.991	8220.32	0.113377	0.180012
snf1-as sch9-S288A	Exp		6508	9561.32	0.68066	1.08071
	-C	DMSO	834.406	8377.9	0.099596	0.158132
snf1-as sch9-S288E	Exp		4293.76	8860.32	0.484606	0.769427
	-C	DMSO	608.092	8718.32	0.0697488	0.110743
snf1-as pib2-SASA	Exp		6251.3	9810.9	0.637178	1.01167
	-C	DMSO	571.749	9263.61	0.0617199	0.097995
snf1-as pib2-SESE	Exp		5268.76	9828.9	0.536048	0.851104
	-C	DMSO	520.849	7852.95	0.0663252	0.105307
snf1-as pib2-SASA sch9-S288A	Exp		4353.35	7826.95	0.556199	0.883099
	-C	DMSO	783.749	7210.66	0.108693	0.172576
snf1-as pib2-SESE sch9-S288E	Exp		3231.52	8120.07	0.397967	0.631867
	-C	DMSO	208.95	6959.42	0.0300241	0.0476704
snf1-as	Exp		8286.42	6648.78	1.24631	1
	-C	2NM-PP1	3581.45	5763.32	0.621421	0.49861
snf1-as sch9-S288A	Exp		8114.42	7087.9	1.14483	0.918576
	-C	2NM-PP1	3258.93	7687.07	0.42395	0.340165
snf1-as sch9-S288E	Exp		4376.93	6745.25	0.648892	0.520652
	-C	2NM-PP1	2259.03	7588.9	0.297676	0.238846
snf1-as pib2-SASA	Exp		6950.18	8186.78	0.848951	0.681174
	-C	2NM-PP1	2624.98	7144.07	0.367435	0.294819
snf1-as pib2-SESE	Exp		5324.05	8115.37	0.656046	0.526392
	-C	2NM-PP1	605.335	6212.93	0.0974314	0.0781762
snf1-as pib2-SASA sch9-S288A	Exp		4532.64	7697.66	0.588833	0.472463
	-C	2NM-PP1	1729.79	7018.95	0.246446	0.197741
snf1-as pib2-SESE sch9-S288E	Exp		3193.1	6887.12	0.463634	0.372006
	-C	2NM-PP1	125.536	5074.3	0.0247396	0.0198503
Sch9-pThr737			Replica 1		Replica 2		Replica 3		Replica 4		Average	SEM
snf1-as	Exp		1	1	1	1	1	1	1	1	1	0
	-C	DMSO	0.234536		0.233047		0.290092		0.180012		0.234422	0.022475
		2NM-PP1		0.558041		0.481866		0.588837		0.49861	0.531839	0.0250611
snf1-as sch9-S288A	Exp		0.898383	1.11263	1.03041	1.01603	1.56838	1.05642	1.08071	0.918576	1.08519	0.0738616
	-C	DMSO	0.187689		0.20626		0.366228		0.158132		0.229577	0.0466156
		2NM-PP1		0.652448		0.617718		0.609094		0.340165	0.554856	0.0721745
snf1-as sch9-S288E	Exp		0.910798	0.998411	0.799639	0.866454	1.5465	0.822498	0.769427	0.520652	0.904298	0.104007
	-C	DMSO	0.165581		0.146839		0.208757		0.110743		0.15798	0.0203951
		2NM-PP1		0.445971		0.402736		0.468349		0.238846	0.388976	0.0518627
snf1-as pib2-SASA	Exp		0.746887	0.915799	1.21829	1.06522	1.86734	1.2467	1.01167	0.681174	1.09414	0.131414
	-C	DMSO	0.236164		0.206766		0.31994		0.097995		0.215216	0.0458423
		2NM-PP1		0.626747		0.468019		0.785037		0.294819	0.543656	0.105202
snf1-as pib2-SESE	Exp		0.935418	1.11141	0.933014	0.476575	1.33167	1.02373	0.851104	0.526392	0.898664	0.100883
	-C	DMSO	0.12791		0.098309		0.129996		0.105307		0.11538	0.00797646
		2NM-PP1		0.270164		0.140029		0.249494		0.0781762	0.184466	0.0455017
snf1-as pib2-SASA sch9-S288A	Exp		0.946388	1.11507	0.809625	0.843661	1.38771	1.28246	0.883099	0.472463	0.96756	0.102682
	-C	DMSO	0.25458		0.180358		0.292591		0.172576		0.225026	0.0291329
		2NM-PP1		0.617566		0.357499		0.792633		0.197741	0.49136	0.132547
snf1-as pib2-SESE sch9-S288E	Exp		0.803084	0.84617	0.735543	0.738367	1.49682	1.08944	0.631867	0.372006	0.839162	0.117914
	-C	DMSO	0.0828369		0.0650867		0.190903		0.0476704		0.0966242	0.0322357
		2NM-PP1		0.197035		0.0906259		0.181595		0.0198503	0.122276	0.041433

## Sheet: Fig. 6C
Figure 6C
Sch9-pThr737		Phospho	Tot	P/tot	Normalised
Replica 1	SC	8831.02	9790.61	0.901989	1
	Low N	3434.69	6688	0.51356	0.569364
Replica 2	SC	9436.97	10547.3	0.894727	1
	Low N	2176.5	4907.05	0.443545	0.495731
Replica 3	SC	10372.7	9867.32	1.05122	1
	Low N	2583.03	5124.64	0.504042	0.479482
Replica 4	SC	9235.73	8955.61	1.03128	1
	Low N	2603.74	5765.3	0.451623	0.437925
Replica 5	SC	9575.41	5977.61	1.60188	1
	Low N	4172.25	3940.71	1.05875	0.660945
Replica 6	SC	13019.1	8383.63	1.55291	1
	Low N	1741.2	2857.52	0.609342	0.392386
Replica 7	SC	9702.89	7500.39	1.29365	1
	Low N	3762.66	7799.39	0.48243	0.372921
Replica 8	SC	8515.34	10378.2	0.820505	1
	Low N	2810.93	6282.07	0.447453	0.545338
Replica 9	SC	10221.9	9908.7	1.03161	1
	Low N	7340.49	11847.8	0.619564	0.60058
Replica 10	SC	11760.5	13533.3	0.869001	1
	Low N	7214.07	14832.3	0.486376	0.559695
Sch9-pThr737	Replica 1	Replica 2	Replica 3	Replica 4	Replica 5	Replica 6	Replica 7	Replica 8	Replica 9	Replica 10	Average	SEM
SC	1	1	1	1	1	1	1	1	1	1	1	0
Low N	0.569364	0.495731	0.479482	0.437925	0.660945	0.392386	0.372921	0.545338	0.60058	0.559695	0.511437	0.0292811
Snf1-pThr210		Phospho	Tot	P/tot	Normalised
Replica 1	SC	4268.2	3004.67	1.42052	1
	Low N	4851.84	2591.67	1.87209	1.31789
Replica 2	SC	5103.33	5469.45	0.933061	1
	Low N	3499.84	2602.26	1.34493	1.44141
Replica 3	SC	5229.33	6785.52	0.77066	1
	Low N	3950.96	3688.33	1.07121	1.38999
Replica 4	SC	4434.5	5565.86	0.796732	1
	Low N	4029.55	1842.72	2.18674	2.74464
Replica 5	SC	4505.62	5525.98	0.815352	1
	Low N	4025.03	2118.72	1.89975	2.32997
Replica 6	SC	6668.64	6893.1	0.967436	1
	Low N	2381.55	1262.06	1.88703	1.95055
Replica 7	SC	4816.15	4306.62	1.11831	1
	Low N	5148.74	3185.96	1.61607	1.4451
Replica 8	SC	4905.57	4438.2	1.1053	1
	Low N	3694.33	1974.72	1.87081	1.69257
Replica 9	SC	2989.08	3757.15	0.795571	1
	Low N	5844.33	5985.1	0.976479	1.22739
Replica 10	SC	3394.15	4941.4	0.686881	1
	Low N	5814.15	5810.98	1.00055	1.45665
Snf1-pThr210	Replica 1	Replica 2	Replica 3	Replica 4	Replica 5	Replica 6	Replica 7	Replica 8	Replica 9	Replica 10	Average	SEM
SC	1	1	1	1	1	1	1	1	1	1	1	0
Low N	1.31789	1.44141	1.38999	2.74464	2.32997	1.95055	1.4451	1.69257	1.22739	1.45665	1.69962	0.156614

## Sheet: Fig. 6D
Figure 6D
Replica 1	Sch9-pThr737	Tot Sch9	pSch9/total	Normalized
snf1-as	8021.18	13521.9	0.593197	1
snf1-as sch9-S288A	7019.93	9190.15	0.763854	1.28769
snf1-as sch9-S288E	4005.86	6894.54	0.581019	0.979472
snf1-as pib2-SASA	8263	7299.25	1.13204	1.90836
snf1-as pib2-SESE	6690.64	7346.71	0.910699	1.53524
snf1-as pib2-SASA sch9-S288A	9327	9689.9	0.962549	1.62265
snf1-as pib2-SESE sch9-S288E	2666.62	7443.49	0.358249	0.603929
Replica 2	Sch9-pThr737	Tot Sch9	pSch9/total	Normalized
snf1-as	9234.56	9843.47	0.938141	1
snf1-as sch9-S288A	8344.85	9232.3	0.903876	0.963476
snf1-as sch9-S288E	8744.85	9362.59	0.934021	0.995608
snf1-as pib2-SASA	7580.44	8677.93	0.87353	0.931129
snf1-as pib2-SESE	4617.88	4849.28	0.952283	1.01507
snf1-as pib2-SASA sch9-S288A	6417.61	7063.81	0.908519	0.968425
snf1-as pib2-SESE sch9-S288E	4011.18	5702.69	0.703383	0.749763
Replica 3	Sch9-pThr737	Tot Sch9	pSch9/total	Normalized
snf1-as	6045.83	4388.52	1.37765	1
snf1-as sch9-S288A	8702.85	5534.05	1.5726	1.14151
snf1-as sch9-S288E	6729.49	5122.76	1.31364	0.953542
snf1-as pib2-SASA	9610.73	9861.32	0.974589	0.70743
snf1-as pib2-SESE	5774.12	7235.69	0.798006	0.579253
snf1-as pib2-SASA sch9-S288A	9800.44	7429.71	1.31909	0.957493
snf1-as pib2-SESE sch9-S288E	5716.07	4190.81	1.36395	0.99006
Replica 4	Sch9-pThr737	Tot Sch9	pSch9/total	Normalized
snf1-as	7294.9	4985.05	1.46335	1
snf1-as sch9-S288A	6174.78	3950.4	1.56308	1.06815
snf1-as sch9-S288E	7214.9	4512.52	1.59886	1.0926
snf1-as pib2-SASA	11539.5	6901.42	1.67205	1.14261
snf1-as pib2-SESE	6463.49	4569.93	1.41435	0.966513
snf1-as pib2-SASA sch9-S288A	7822.73	4991.64	1.56717	1.07094
snf1-as pib2-SESE sch9-S288E	2308.03	2085.79	1.10655	0.756174
Sch9-pThr737	Replica 1	Replica 2	Replica 3	Replica 4	Average	SEM
snf1-as	1	1	1	1	1	0
snf1-as sch9-S288A	1.28769	0.963476	1.06815	0.861345	1.04516	0.0912004
snf1-as sch9-S288E	0.979472	0.995608	1.0926	0.88347	0.987788	0.042816
snf1-as pib2-SASA	1.90836	0.931129	1.14261	1.1835	1.2914	0.212959
snf1-as pib2-SESE	1.53524	1.01507	0.966513	0.952342	1.11729	0.139961
snf1-as pib2-SASA sch9-S288A	1.62265	0.968425	1.07094	0.906985	1.14225	0.163664
snf1-as pib2-SESE sch9-S288E	0.603929	0.749763	0.756174	0.481228	0.647773	0.0657091
