# Supplementary material for: Snf1/AMPK fine-tunes TORC1 signaling in response to glucose starvation
Source: eLife. 2023 Feb 7;12:e84319. doi: 10.7554/eLife.84319 (PMC9937656; doi:10.7554/eLife.84319)
Supplement: Supplementary file 2. [file elife-84319-supp2.xlsx]

## Sheet: Supplementary File 2A
Supplementary File 2A: Quantified phosphosites. Phosphosites were filtered on a localization probability >0.75 and normalized to protein abundance. Column A and C list the t-test differences between samples treated or not for 5 min and 15 min with Glc starvation and the inhibitor 2NM-PP1 (Glc starvation-2NM-PP1), respectively. Columns B and D list respective log10 transformed p values (FDR<0.05).…
Difference_5	-LOG(P-value)_5	Difference_15	-LOG(P-value)_15	Difference_OBIKA	-LOG(P-value)_OBIKA	fit_log2fold__DMSO_5min	fit_log2fold__inhibitor_5min	fit_log2fold__DMSO_15min	fit_log2fold__inhibitor_15min	classes_5	Significant_5	LM_Significance__DMSO_5min	LM_Significance__inhibitor_5min	classes_15	Significant_15	LM_Significance__DMSO_15min	LM_Significance__inhibitor_15min	Significant_OBIKA	SILAC 5 min_OBIKA	SILAC 15 min_OBIKA	PEP	Score	Intensity	Localization.prob	Score.for.localization	Mass.error..ppm.	var_log2fold__DMSO_5min	sd_log2fold__DMSO_5min	CI_low__DMSO_5min	CI_high__DMSO_5min	nb_replicate__DMSO_5min	var_log2fold__inhibitor_5min	sd_log2fold__inhibitor_5min	CI_low__inhibitor_5min	CI_high__inhibitor_5min	nb_replicate__inhibitor_5min	var_log2fold__DMSO_15min	sd_log2fold__DMSO_15min	CI_low__DMSO_15min	CI_high__DMSO_15min	nb_replicate__DMSO_15min	var_log2fold__inhibitor_15min	sd_log2fold__inhibitor_15min	CI_low__inhibitor_15min	CI_high__inhibitor_15min	nb_replicate__inhibitor_15min	DMSO_5min_1	DMSO_5min_2	DMSO_5min_3
2.63874	3.08652	2.72072	2.6403	5.55113	6.42303	2.71652	0.299143	2.88	0.240833	++	+	+		++	+	+		+	++_+	++_+	5.85e-07	137.89	1117200000	1	85.536	-0.11603	0.0371413	0.192721	2.22112	3.21193	5	0.0460981	0.214705	-0.296973	0.895258	4	0.04747	0.217876	2.31994	3.44007	5	0.0557777	0.236173	-0.414888	0.896555	4	3.75613	3.74528	2.05379
3.78105	6.8614	2.5996	5.6912	5.36809	9.36191	5.19394	1.43172	4.60121	1.88279	++	+	+	+	++	+	+	+	+	++_+	++_+	1.99e-55	256.31	1605900000	1	52.191	0.11231	0.0371413	0.192721	4.69853	5.68934	5	0.0599863	0.244921	0.652271	2.21117	3	0.04747	0.217876	4.04114	5.16127	5	0.0730558	0.270288	1.02261	2.74297	3	5.53894	5.39242	5.6031
2.78438	4.26094	1.65487	2.79052	4.67577	5.52465	4.25322	1.03653	4.14193	1.97679	++	+	+		++	+	+	+	+	++_+	++_+	0	487.74	897180000	1	472.55	-0.91614	0.0371413	0.192721	3.75781	4.74862	5	0.085858	0.293015	-0.224218	2.29727	2	0.04747	0.217876	3.58186	4.702	5	0.105853	0.325351	0.576916	3.37666	2	4.86295	4.79919	4.40078
1.78645	8.22818	1.30044	8.49486	2.65299	3.38953	1.89326	0.246717	2.04794	0.824524	++	+	+		++	+	+	+	+	++_+	++_+	7.96e-126	336.07	104460000000	1	227.72	-1.2948	0.0371413	0.192721	1.39786	2.38867	5	0.0374333	0.193477	-0.250631	0.744065	5	0.04747	0.217876	1.48787	2.60801	5	0.0451113	0.212394	0.278548	1.3705	5	2.12567	2.08	2.12215
1.52016	4.77709	1.66509	3.39569	2.64267	2.11457	1.53405	0.183639	2.84968	1.45672	++	+	+		++	+	+	+	+	++_+	++_+	1.98e-35	221.09	760480000	1	221.09	-0.024593	0.0371413	0.192721	1.03864	2.02945	5	0.0460981	0.214705	-0.412476	0.779755	4	0.04747	0.217876	2.28961	3.40975	5	0.0557776	0.236173	0.800997	2.11244	4	2.03108	1.58735	1.95392
2.95549	6.78904	2.05339	4.74593	2.59635	3.25833	2.62242	-0.131433	1.75028	-0.191543	++	+	+		++	+	+		+	++_+	++_+	3.49e-21	189.43	9001000000	1	64.405	1.3793	0.0371413	0.192721	2.12702	3.11783	5	0.0374333	0.193477	-0.628781	0.365915	5	0.04747	0.217876	1.19021	2.31035	5	0.0451113	0.212394	-0.737519	0.354434	5	2.51378	2.5137	3.31534
1.83025	5.75656	1.40425	5.1862	2.53636	2.0956	1.75075	0.0646125	2.3325	1.00796	++	+	+		++	+	+	+	+	++_+	++_+	1.39e-45	237.59	4715700000	1	143	0.21107	0.0371413	0.192721	1.25535	2.24616	5	0.0374333	0.193477	-0.432735	0.56196	5	0.04747	0.217876	1.77243	2.89257	5	0.0451113	0.212394	0.461987	1.55394	5	1.67095	2.27402	1.59338
1.58853	2.08541	1.26405	1.51291	1.89235	1.86081	1.49101	0.0350423	2.21769	1.02801	++	+	+		++	+	+	+	+	++_+	++_+	2.62e-28	203.76	2812300000	1	160.8	0.35177	0.0371413	0.192721	0.995606	1.98641	5	0.0374333	0.193477	-0.462306	0.53239	5	0.04747	0.217876	1.65762	2.77776	5	0.0451113	0.212394	0.482031	1.57398	5	2.13698	1.66608	2.11167
3.49355	6.47647	3.20857	3.57329	1.80957	3.68493	2.37089	-0.886068	2.97945	-0.039799	++	+	+	-	++	+	+		+	++_+	++_+	0.000157755	99.752	2321900000	1	61.344	-0.18022	0.0371413	0.192721	1.87548	2.86629	5	0.0374333	0.193477	-1.38342	-0.38872	5	0.0587819	0.24245	2.3063	3.6526	4	0.0451113	0.212394	-0.585776	0.506178	5	2.59562	1.79449	2.74274
1.46789	3.43467	2.11885	2.19863	1.49068	3.26967	0.958871	-0.377739	1.96351	-0.0161686	++	+	+		++	+	+		+	++_+	++_+	4.96e-115	314.29	6000200000	1	66.793	0.53208	0.0371413	0.192721	0.463467	1.45428	5	0.0374333	0.193477	-0.875087	0.119609	5	0.0587819	0.24245	1.29036	2.63666	4	0.0451113	0.212394	-0.562145	0.529808	5	1.63413	0.539154	1.69003
4.13817	6.84677	3.31923	3.45543	1.19018	2.22048	3.21543	-0.657036	3.29114	0.166924	++	+	+	-	++	+	+		+	++_+	++_+	8.62e-06	119.53	6541800000	1	61.344	-0.18022	0.0371413	0.192721	2.72003	3.71084	5	0.0374333	0.193477	-1.15438	-0.159688	5	0.0587819	0.24245	2.61799	3.96429	4	0.0451113	0.212394	-0.379053	0.7129	5	3.86155	2.98962	4.05616
-0.907241	2.32689	1.20622	5.94991	3.40622	2.4344	0.0665401	0.973075	0.820844	-0.304605		+		+	++	+	+		+		++_+	5.54e-56	247.95	6838600000	1	185.37	-0.18082	0.0371413	0.192721	-0.428864	0.561944	5	0.0374333	0.193477	0.475727	1.47042	5	0.04747	0.217876	0.260775	1.38091	5	0.0451113	0.212394	-0.850581	0.241372	5	0.10574	0.178384	0.192436
0.318631	0.309929	1.18924	4.87626	2.28874	2.37866	1.34602	1.08567	2.48125	1.36145			+	+	++	+	+	+	+		++_+	8.5e-24	206.36	911410000	1	188.27	-1.404	0.0371413	0.192721	0.850613	1.84142	5	0.0374333	0.193477	0.588324	1.58302	5	0.04747	0.217876	1.92118	3.04132	5	0.0451113	0.212394	0.815476	1.90743	5	1.61783	1.1213	1.59276
0.398826	0.670344	1.05235	2.21803	1.03481	2.40081	1.66281	0.833857	2.86342	1.75724			+		++	+	+		+		++_+	1.06e-171	371.87	164500000	1	371.87	0.094107	0.0371413	0.192721	1.1674	2.15821	5	0.150996	0.388582	-4.10355	5.77126	1	0.04747	0.217876	2.30335	3.42349	5	0.19213	0.438326	-3.81222	7.32671	1	1.49153	1.48507	2.26066
1.57666	1.48967	1.659	1.40745	3.58195	1.60286	-0.0907364	-1.60461	0.222421	-1.42124	+	+		-	+	+		-	+	+_+	+_+	4.96e-07	116.63	1664600000	1	98	-0.076056	0.0371413	0.192721	-0.586141	0.404668	5	0.0460981	0.214705	-2.20073	-1.0085	4	0.04747	0.217876	-0.337648	0.782489	5	0.0557776	0.236173	-2.07697	-0.765523	4	0.380981	0.230029	0.472948
0.51706	2.85409	1.10582	3.9628	2.1698	3.18392	-0.248141	-0.703837	0.383862	-0.610905	+	+		-	+	+			+	+_+	+_+	2.78e-07	132.32	1090000000	1	132.32	-0.0027943	0.0371413	0.192721	-0.743546	0.247263	5	0.0460981	0.214705	-1.29995	-0.107722	4	0.04747	0.217876	-0.176206	0.943931	5	0.0557776	0.236173	-1.26663	0.0448158	4	0.0607373	-0.305671	-0.173929
0.416052	2.97561	0.843517	3.78372	2.13369	2.29861	-0.363719	-0.696598	0.00312374	-0.770125	+	+		-	+	+		-	+	+_+	+_+	1.17e-07	157.34	734380000	1	157.34	0.50733	0.0371413	0.192721	-0.859123	0.131685	5	0.0374333	0.193477	-1.19395	-0.19925	5	0.04747	0.217876	-0.556945	0.563192	5	0.0451113	0.212394	-1.3161	-0.224148	5	-0.207406	-0.356072	-0.238639
0.672796	1.12575	0.326787	4.33309	3.37892	6.28675	0.0451208	-0.533717	-0.0146831	-0.293489				-	+	+			+		+_+	3.61e-215	393.88	13836000000	1	213.52	-0.41607	0.0371413	0.192721	-0.450283	0.540525	5	0.0374333	0.193477	-1.03107	-0.0363693	5	0.04747	0.217876	-0.574752	0.545385	5	0.0451113	0.212394	-0.839466	0.252487	5	0.704414	-0.301626	-0.439455
0.335915	1.19949	1.65898	4.11144	2.09776	1.79972	-0.306422	-0.564592	0.543947	-1.01286				-	+	+		-	+		+_+	2.12e-104	317.95	5396100000	1	285.98	0.11407	0.0371413	0.192721	-0.801826	0.188982	5	0.0374333	0.193477	-1.06194	-0.0672445	5	0.04747	0.217876	-0.0161218	1.10402	5	0.0451113	0.212394	-1.55884	-0.466884	5	-0.100173	-0.351756	-0.0798616
0.336429	2.12146	0.34096	3.84706	2.01514	4.72985	-0.345644	-0.60386	-0.0802028	-0.372149				-	+	+			+		+_+	5.63e-56	263.29	2364900000	1	128.67	-0.1052	0.0371413	0.192721	-0.841049	0.14976	5	0.0374333	0.193477	-1.10121	-0.106512	5	0.04747	0.217876	-0.640271	0.479866	5	0.0451113	0.212394	-0.918126	0.173827	5	-0.216742	-0.381479	-0.198504
0.00790263	0.0294717	0.713296	3.61678	1.29994	3.48251	-0.422368	-0.370835	-0.225323	-0.872537					+	+		-	+		+_+	7.29e-08	152.23	2591300000	1	58.398	0.061502	0.0371413	0.192721	-0.917773	0.0730361	5	0.0374333	0.193477	-0.868183	0.126513	5	0.04747	0.217876	-0.785391	0.334746	5	0.0451113	0.212394	-1.41851	-0.326561	5	-0.408611	-0.50077	-0.367681
1.7759	5.93563	0.171225	0.415588	3.22963	4.91749	3.39508	1.7417	3.53296	3.38033	++	+	+	+			+	+	+	++_+		1.07e-55	256.71	44263000000	1	87.216	-0.15566	0.0371413	0.192721	2.89967	3.89048	5	0.0374333	0.193477	1.24435	2.23905	5	0.04747	0.217876	2.9729	4.09303	5	0.0451113	0.212394	2.83435	3.92631	5	3.84041	3.37278	3.93246
1.60098	3.04572	0.444317	1.14394	2.43932	2.12475	2.84251	1.35976	2.95496	2.54477	++	+	+	+			+	+	+	++_+		1.38e-110	308.29	670560000	1	105.52	-0.69672	0.0371413	0.192721	2.3471	3.33791	5	0.0374333	0.193477	0.862415	1.85711	5	0.04747	0.217876	2.39489	3.51503	5	0.0451113	0.212394	1.99879	3.09074	5	2.99826	3.3322	3.32596
2.09769	1.84774	1.43007	1.39806	1.99622	1.90024	1.57425	-0.361384	0.959272	-0.381202	++	+	+				+		+	++_+		2.39e-94	298.93	976650000	1	298.93	0.54926	0.0371413	0.192721	1.07884	2.06965	5	0.0374333	0.193477	-0.858732	0.135964	5	0.04747	0.217876	0.399203	1.51934	5	0.0451113	0.212394	-0.927178	0.164775	5	-0.0979473	0.357453	2.92722
0.838989	2.505	-0.310786	1.44199	1.75559	2.58595	1.18884	0.44099	1.35934	1.6817	++	+	+				+	+	+	++_+		2.83e-29	194.37	3421300000	1	116.86	-0.24527	0.0371413	0.192721	0.693438	1.68425	5	0.0374333	0.193477	-0.0563578	0.938338	5	0.04747	0.217876	0.799274	1.91941	5	0.0451113	0.212394	1.13572	2.22767	5	1.41528	1.95435	1.34163
0.643963	3.4852	0.0779248	0.163343	1.23728	2.7372	1.4468	0.879439	1.80312	1.75078	++	+	+	+			+	+	+	++_+		2.22e-56	261.1	6526300000	1	129.82	0.092075	0.0371413	0.192721	0.951393	1.9422	5	0.0374333	0.193477	0.382091	1.37679	5	0.04747	0.217876	1.24305	2.36319	5	0.0451113	0.212394	1.20481	2.29676	5	1.85797	1.33794	1.61937
0.881492	1.82935	0.709125	1.66083	0.988966	1.98657	1.91227	1.11638	2.28049	1.62127	++	+	+	+			+	+	+	++_+		9.48e-210	378.43	18818000000	1	184.96	-0.26361	0.0371413	0.192721	1.41686	2.40767	5	0.0374333	0.193477	0.619036	1.61373	5	0.04747	0.217876	1.72042	2.84056	5	0.0451113	0.212394	1.07529	2.16725	5	1.46823	2.39302	1.85565
0.831104	4.40296	0.546782	1.82364	2.22611	3.02276	0.325443	-0.405369	0.944618	0.44923	+	+					+		+	+_+		5.3e-15	167.3	5185200000	1	161.41	-0.055092	0.0371413	0.192721	-0.169961	0.820847	5	0.0374333	0.193477	-0.902717	0.091979	5	0.04747	0.217876	0.384549	1.50469	5	0.0451113	0.212394	-0.0967464	0.995207	5	0.723273	0.296473	0.347923
0.408215	3.96317	-0.0618979	0.033687	1.86068	2.83058	0.119545	-0.211354	-1.00462	-0.905275	+	+					-	-	+	+_+		1.96e-72	283.13	4121100000	1	283.13	-0.77627	0.0371413	0.192721	-0.375859	0.61495	5	0.0374333	0.193477	-0.708702	0.285994	5	0.04747	0.217876	-1.56469	-0.444553	5	0.0451113	0.212394	-1.45125	-0.359298	5	0.122181	0.140919	0.167471
1.09217	2.53139	1.14274	1.30874	1.58904	3.15721	0.193073	-0.781728	0.573312	-0.476546	+	+		-					+	+_+		3.47e-260	422.29	5379100000	1	66.793	0.53208	0.0371413	0.192721	-0.302331	0.688477	5	0.0374333	0.193477	-1.27908	-0.28438	5	0.0587819	0.24245	-0.0998371	1.24646	4	0.0451113	0.212394	-1.02252	0.0694301	5	0.729416	-0.163885	0.949602
1.11996	5.54574	1.27737	6.73548	NaN	NaN	1.24682	0.234136	1.8511	0.651015	++	+	+		++	+	+	+				7.29e-69	256.92	772520000	1	256.92	3.2603	0.0371413	0.192721	0.751411	1.74222	5	0.0374333	0.193477	-0.263212	0.731484	5	0.04747	0.217876	1.29104	2.41117	5	0.0451113	0.212394	0.105038	1.19699	5	1.48748	1.34555	1.42649
1.04943	2.24656	0.384183	1.35968	NaN	NaN	1.21491	0.268907	2.16074	1.81314	++	+	+				+	+				7.87e-07	136.5	289150000	1	125.97	0.78189	0.0371413	0.192721	0.71951	1.71032	5	0.0374333	0.193477	-0.228441	0.766255	5	0.04747	0.217876	1.60067	2.7208	5	0.0451113	0.212394	1.26716	2.35911	5	1.34894	1.28434	1.23261
1.25376	3.37421	0.65036	2.13308	NaN	NaN	1.4084	0.396265	2.33902	1.81984	++	+	+		++	+	+	+				0.000253404	104.05	178660000	1	83.081	-0.63606	0.0371413	0.192721	0.912992	1.9038	5	0.0460981	0.214705	-0.199851	0.992381	4	0.04747	0.217876	1.77895	2.89909	5	0.0557776	0.236173	1.16412	2.47557	4	1.84438	1.89456	1.42054
0.817899	1.96133	0.0825836	0.0953444	NaN	NaN	0.765701	0.045946	-0.153744	-0.209413	++	+	+									2.65e-27	194.96	276240000	1	151.98	0.31654	0.0458584	0.214146	0.171138	1.36027	4	0.0374333	0.193477	-0.451402	0.543294	5	0.058782	0.24245	-0.826893	0.519405	4	0.0451113	0.212394	-0.75539	0.336563	5	NaN	0.492151	0.713509
3.42143	5.96669	5.28066	5.51922	NaN	NaN	2.41867	-0.859126	2.13486	-2.98644	++	+	+	-	++	+	+	-				4.84e-08	139.08	182500000	1	133.94	-2.4383	0.0458584	0.214146	1.82411	3.01324	4	0.0460981	0.214705	-1.45524	-0.26301	4	0.058782	0.24245	1.46171	2.80801	4	0.0557777	0.236173	-3.64216	-2.33072	4	NaN	2.75989	2.8969
0.446494	2.9689	0.250208	0.821294	NaN	NaN	1.5942	1.21086	2.3818	2.16096	++	+	+	+			+	+				5.83e-13	165.3	235730000	1	165.3	-0.48377	0.0371413	0.192721	1.09879	2.0896	5	0.0374333	0.193477	0.713513	1.70821	5	0.04747	0.217876	1.82173	2.94187	5	0.0451113	0.212394	1.61498	2.70693	5	1.60375	1.86603	1.61156
0.524561	5.40649	0.30256	2.09702	NaN	NaN	1.61582	1.15885	1.91943	1.65146	++	+	+	+			+	+				5.02e-237	402.83	7713800000	1	226.71	0.57938	0.0371413	0.192721	1.12042	2.11123	5	0.0374333	0.193477	0.661499	1.6562	5	0.04747	0.217876	1.35936	2.4795	5	0.0451113	0.212394	1.10548	2.19743	5	1.77065	1.84723	1.69931
2.06123	3.86794	0.385526	0.3479	NaN	NaN	1.20119	-0.696002	-0.897547	-1.22691	++	+	+	-			-	-				0.00134017	99.855	2753300000	1	68.657	0.12881	0.0371413	0.192721	0.705782	1.69659	5	0.0374333	0.193477	-1.19335	-0.198655	5	0.04747	0.217876	-1.45762	-0.337478	5	0.0451113	0.212394	-1.77289	-0.680934	5	0.408654	1.35487	2.09306
0.580793	2.19754	0.15083	0.626203	NaN	NaN	1.17152	0.66663	1.87365	1.75112	++	+	+	+			+	+				1.43e-236	399.65	1367500000	1	399.65	0.98167	0.0371413	0.192721	0.676119	1.66693	5	0.0374333	0.193477	0.169282	1.16398	5	0.04747	0.217876	1.31358	2.43372	5	0.0451113	0.212394	1.20514	2.29709	5	1.06637	1.2673	1.24316
1.87132	2.31525	-0.036519	0.0263302	NaN	NaN	2.80482	1.06832	-0.0823335	-0.0337374	++	+	+	+								3.35e-06	118.61	1200900000	1	118.61	0.75454	0.0371413	0.192721	2.30942	3.30023	5	0.0374333	0.193477	0.570969	1.56566	5	0.04747	0.217876	-0.642402	0.477735	5	0.0557778	0.236173	-0.68946	0.621985	4	4.08592	2.89468	2.72623
0.691345	2.94088	0.245437	2.12561	NaN	NaN	0.683676	0.0802766	0.270689	0.0678844	++	+	+									6.61e-07	139.32	4097700000	1	136.61	0.54266	0.0371413	0.192721	0.188272	1.17908	5	0.0374333	0.193477	-0.417071	0.577625	5	0.04747	0.217876	-0.289379	0.830758	5	0.0451113	0.212394	-0.478092	0.613861	5	0.979977	0.650943	0.873586
0.607634	2.22055	0.271973	2.32299	NaN	NaN	0.51035	-0.0124084	1.40235	1.16694	++	+	+				+	+				2.79e-66	270.85	10539000000	1	218.07	-1.7026	0.0371413	0.192721	0.0149459	1.00575	5	0.0374333	0.193477	-0.509756	0.48494	5	0.04747	0.217876	0.842284	1.96242	5	0.0451113	0.212394	0.620961	1.71291	5	0.796502	0.501041	0.602349
0.647374	2.97815	0.269429	0.59009	NaN	NaN	0.947777	0.387078	0.860168	0.798738	++	+	+				+	+				5.91e-77	258.25	332140000	1	258.25	0.11625	0.0371413	0.192721	0.452373	1.44318	5	0.0460981	0.214705	-0.209038	0.983194	4	0.04747	0.217876	0.300099	1.42024	5	0.0557777	0.236173	0.143016	1.45446	4	0.830335	1.23403	1.31854
1.42905	3.24869	2.13977	4.66313	NaN	NaN	1.37069	NaN	1.15888	NaN	++	+	+		++	+	+					3.04e-111	309.88	70014000	1	309.88	0.27239	0.0371413	0.192721	0.875288	1.8661	5	NaN	NaN	NaN	NaN	NaN	0.04747	0.217876	0.598809	1.71895	5	NaN	NaN	NaN	NaN	NaN	1.07845	1.52519	2.25136
0.759267	2.92714	-0.181632	0.948963	NaN	NaN	1.02862	0.357508	-0.0660981	0.141802	++	+	+									1.8e-07	146.71	587460000	1	87.942	-0.6704	0.0371413	0.192721	0.533212	1.52402	5	0.0374333	0.193477	-0.13984	0.854856	5	0.04747	0.217876	-0.626167	0.49397	5	0.0451113	0.212394	-0.404175	0.687779	5	0.977934	1.05652	0.896544
1.21312	3.93692	1.65431	6.87762	NaN	NaN	0.633195	-0.460232	1.49675	-0.0616769	++	+	+		++	+	+					7.92e-75	273.09	3338000000	1	198.32	-1.193	0.0371413	0.192721	0.137791	1.1286	5	0.0374333	0.193477	-0.95758	0.0371163	5	0.04747	0.217876	0.936677	2.05681	5	0.0451113	0.212394	-0.607653	0.4843	5	1.29012	0.591415	0.888481
1.1988	2.08728	0.921915	2.25816	NaN	NaN	1.2324	0.360834	1.96878	1.07444	++	+	+		++	+	+					1.43e-06	128.99	30682000	1	114.56	-0.7861	0.0458584	0.214146	0.637834	1.82696	4	0.0858582	0.293016	-0.899911	1.62158	2	0.058782	0.24245	1.29564	2.64193	4	0.105853	0.325351	-0.325438	2.47431	2	1.61313	0.931885	1.48965
1.10081	1.74178	-1.47536	0.95444	NaN	NaN	2.54647	1.5373	2.15455	3.58592	++	+	+	+			+	+				4.43e-182	375.69	8221900000	1	248.46	0.32854	0.0371413	0.192721	2.05107	3.04187	5	0.0374333	0.193477	1.03995	2.03465	5	0.04747	0.217876	1.59448	2.71462	5	0.0451113	0.212394	3.03994	4.13189	5	3.18914	3.41876	1.87229
0.871904	2.76587	0.348591	1.71975	NaN	NaN	0.74206	-0.0317588	0.277603	-0.023928	++	+	+									1.41e-72	264.85	813150000	1	125.41	-1.2598	0.0371413	0.192721	0.246655	1.23746	5	0.0374333	0.193477	-0.529107	0.465589	5	0.04747	0.217876	-0.282466	0.837671	5	0.0451113	0.212394	-0.569904	0.522049	5	1.11296	0.253626	0.772922
4.16568	5.20276	3.32303	4.40595	NaN	NaN	3.79596	-0.158361	4.52345	1.41489	++	+	+		++	+	+	+				9.02e-07	110.9	702250000	1	98.592	1.4427	0.0371413	0.192721	3.30056	4.29136	5	0.0599861	0.244921	-0.937808	0.621085	3	0.04747	0.217876	3.96338	5.08352	5	0.0730556	0.270288	0.554709	2.27506	3	4.20955	3.0388	4.44261
1.28236	2.43814	2.23176	3.42224	NaN	NaN	1.6627	NaN	2.16199	NaN	++	+	+		++	+	+					0.000651968	93.649	33643000	1	49.06	-0.5168	0.0599259	0.244798	0.883645	2.44176	3	NaN	NaN	NaN	NaN	NaN	0.0771789	0.277811	1.27787	3.0461	3	NaN	NaN	NaN	NaN	NaN	2.17808	1.92675	1.59633
3.00845	3.6507	2.73311	3.53001	NaN	NaN	1.18528	-1.48524	0.563239	-2.06591	++	+	+	-	+	+		-				3.88e-38	213.2	146180000	1	213.2	1.0145	0.0599259	0.244798	0.406221	1.96433	3	0.0460981	0.214705	-2.08135	-0.889122	4	0.0771789	0.277811	-0.32088	1.44736	3	0.0557777	0.236173	-2.72163	-1.41018	4	2.3088	0.734355	NaN
2.97536	3.04098	2.34137	4.31959	NaN	NaN	3.44083	0.65917	3.95951	1.72809	++	+	+	+	++	+	+	+				5.15e-10	151.16	4462200000	1	115.75	-1.1709	0.0371413	0.192721	2.94543	3.93623	5	0.0374333	0.193477	0.161822	1.15652	5	0.04747	0.217876	3.39944	4.51958	5	0.0451113	0.212394	1.18211	2.27407	5	3.59619	3.46817	4.92719
0.898221	4.11476	0.851314	3.22969	NaN	NaN	1.26253	0.458161	2.22102	1.42615	++	+	+		++	+	+	+				3.3e-62	254.1	443900000	1	230.23	0.37897	0.0371413	0.192721	0.767123	1.75793	5	0.0374333	0.193477	-0.0391873	0.955509	5	0.04747	0.217876	1.66095	2.78108	5	0.0451113	0.212394	0.880174	1.97213	5	1.38531	1.5057	1.66368
2.07954	4.322	1.45388	1.55375	NaN	NaN	2.14986	0.224874	1.92628	0.556859	++	+	+		++	+	+	+				6.29e-17	173.64	2368400000	1	124.67	1.0228	0.0371413	0.192721	1.65445	2.64526	5	0.0374333	0.193477	-0.272474	0.722222	5	0.04747	0.217876	1.36622	2.48635	5	0.0451113	0.212394	0.010883	1.10284	5	1.90096	1.77055	2.66543
1.22455	1.75	-0.0470595	0.0922209	NaN	NaN	1.90111	0.747664	1.68223	1.65368	++	+	+	+			+	+				1.93e-110	305.48	797110000	1	236.92	0.94076	0.0371413	0.192721	1.4057	2.39651	5	0.0460981	0.214705	0.151549	1.34378	4	0.04747	0.217876	1.12216	2.2423	5	0.0557776	0.236173	0.997957	2.3094	4	2.1537	2.28399	2.17025
1.81137	2.99687	1.62714	4.45189	NaN	NaN	0.852461	NaN	1.59256	NaN	++	+	+		++	+	+					2.78e-74	283.03	164860000	1	283.03	0.57081	0.0458584	0.214146	0.257897	1.44702	4	NaN	NaN	NaN	NaN	NaN	0.0587819	0.24245	0.919416	2.26571	4	NaN	NaN	NaN	NaN	NaN	1.53253	0.648183	1.55557
1.85554	3.34068	-0.230508	1.13166	NaN	NaN	1.67823	0.036448	-0.49529	-0.168835	++	+	+									2.51e-27	195.77	242720000	1	195.77	-0.29286	0.0599259	0.244798	0.899177	2.45729	3	0.0460982	0.214705	-0.559669	0.632565	4	0.0771789	0.277811	-1.37941	0.388828	3	0.0557778	0.236173	-0.824558	0.486887	4	2.37904	2.16544	1.20728
1.77974	2.16373	0.112717	0.111611	NaN	NaN	1.15416	-0.477845	-1.42101	-1.48605	++	+	+				-	-				0	617.64	709900000	1	199.75	0.58316	0.0371413	0.192721	0.658751	1.64956	5	0.0374333	0.193477	-0.975193	0.0195031	5	0.04747	0.217876	-1.98107	-0.860938	5	0.0451113	0.212394	-2.03202	-0.940069	5	0.257008	0.950968	1.56823
1.92123	3.74734	0.962452	1.15276	NaN	NaN	1.33303	-0.340561	0.822298	-0.63595	++	+	+				+					9.7e-50	237.26	133880000	1	237.26	0.25505	0.0371413	0.192721	0.837625	1.82843	5	0.150996	0.388582	-5.27796	4.59684	1	0.04747	0.217876	0.26223	1.38237	5	0.19213	0.438326	-6.20541	4.93351	1	1.54145	1.86235	0.396138
0.70386	2.35061	0.0999642	0.286111	NaN	NaN	1.99919	1.36935	2.094	2.01872	++	+	+	+			+	+				6.94e-104	304.86	2009800000	1	304.86	-0.30115	0.0371413	0.192721	1.50378	2.49459	5	0.0374333	0.193477	0.872003	1.8667	5	0.04747	0.217876	1.53393	2.65406	5	0.0451113	0.212394	1.47274	2.56469	5	2.13335	2.18583	2.02614
0.842657	2.28695	0.112004	0.26256	NaN	NaN	1.19141	0.440079	1.34754	1.26551	++	+	+				+	+				1.59e-78	275.76	1371700000	1	264.46	1.143	0.0371413	0.192721	0.696005	1.68681	5	0.0374333	0.193477	-0.0572692	0.937427	5	0.04747	0.217876	0.787473	1.90761	5	0.0451113	0.212394	0.719535	1.81149	5	1.66887	0.594662	1.52591
0.947287	3.61553	0.76444	2.33611	NaN	NaN	0.793474	-0.0517959	2.24988	1.53793	++	+	+		++	+	+	+				2.18e-31	197.89	520040000	1	184.11	-0.2389	0.0371413	0.192721	0.29807	1.28888	5	0.0374333	0.193477	-0.549144	0.445552	5	0.04747	0.217876	1.68981	2.80994	5	0.0451113	0.212394	0.991958	2.08391	5	0.992276	0.695351	1.11304
5.76534	5.12806	2.69741	3.84446	NaN	NaN	5.4138	NaN	2.80674	NaN	++	+	+		++	+	+					0.00739406	66.19	80496000	1	66.19	-0.22178	0.0599259	0.244798	4.63475	6.19286	3	NaN	NaN	NaN	NaN	NaN	0.0771789	0.277811	1.92262	3.69086	3	NaN	NaN	NaN	NaN	NaN	6.7383	NaN	5.97914
1.39198	2.32184	0.749632	0.946836	NaN	NaN	1.13388	-0.133306	0.789257	0.100805	++	+	+				+					2.32e-75	260.77	294410000	1	260.77	0.053263	0.0371413	0.192721	0.638473	1.62928	5	0.0374333	0.193477	-0.630653	0.364042	5	0.04747	0.217876	0.229189	1.34933	5	0.0451113	0.212394	-0.445171	0.646782	5	0.548985	1.89868	2.21598
1.09172	2.20345	0.476628	0.645845	NaN	NaN	1.50617	0.517158	1.5181	1.08616	++	+	+	+			+	+				1.47e-14	191.67	2924600000	1	74.772	0.15031	0.0371413	0.192721	1.01077	2.00158	5	0.0374333	0.193477	0.0198103	1.01451	5	0.04747	0.217876	0.958028	2.07816	5	0.0451113	0.212394	0.540184	1.63214	5	0.878447	2.19001	2.48088
3.52778	9.54455	3.00868	8.61154	NaN	NaN	3.31208	0.0124477	3.53474	0.667652	++	+	+		++	+	+	+				0	470.45	4524400000	1	465.03	-0.30014	0.0371413	0.192721	2.81667	3.80748	5	0.0374333	0.193477	-0.4849	0.509796	5	0.04747	0.217876	2.97468	4.09481	5	0.0451113	0.212394	0.121675	1.21363	5	3.74004	3.41554	3.51438
0.965008	4.34759	0.593549	1.54242	NaN	NaN	1.13507	0.292924	1.6612	1.13707	++	+	+				+					3.17e-31	184.36	79119000	1	184.36	-0.88761	0.0599259	0.244798	0.356014	1.91412	3	0.085858	0.293015	-0.96782	1.55367	2	0.077179	0.277811	0.777077	2.54531	3	0.105853	0.325351	-0.262806	2.53694	2	NaN	NaN	1.32155
1.48676	2.10826	0.194192	0.775154	NaN	NaN	1.36547	-0.00228852	0.283554	0.0452971	++	+	+									4.1e-10	153.09	515190000	1	153.09	1.315	0.0371413	0.192721	0.870068	1.86088	5	0.0460981	0.214705	-0.598404	0.593827	4	0.04747	0.217876	-0.276515	0.843622	5	0.0557776	0.236173	-0.610424	0.701018	4	1.59354	-0.0135632	2.2019
1.09703	4.31717	0.565334	4.00271	NaN	NaN	0.771	-0.214813	1.03423	0.520525	++	+	+		++	+	+					0.00152916	91.087	38254000000	1	79.986	1.9028	0.0371413	0.192721	0.275595	1.2664	5	0.0374333	0.193477	-0.712161	0.282535	5	0.04747	0.217876	0.474164	1.5943	5	0.0451113	0.212394	-0.0254515	1.0665	5	1.04504	0.676225	1.13038
1.00649	2.12936	0.934166	1.82614	NaN	NaN	3.51445	2.59085	4.4635	3.73995	++	+	+	+	++	+	+	+				1.94e-36	213.99	410020000	1	120.66	-0.85596	0.0371413	0.192721	3.01904	4.00985	5	0.0460981	0.214705	1.99474	3.18697	4	0.04747	0.217876	3.90344	5.02357	5	0.0557776	0.236173	3.08423	4.39567	4	4.19516	3.6751	3.95801
1.23142	7.01483	1.88149	8.42058	NaN	NaN	1.36439	0.245599	2.68786	0.904501	++	+	+		++	+	+	+				2.88e-93	301.35	2098100000	1	272.42	2.5919	0.0371413	0.192721	0.868985	1.85979	5	0.0374333	0.193477	-0.251749	0.742947	5	0.04747	0.217876	2.12779	3.24793	5	0.0451113	0.212394	0.358524	1.45048	5	1.58741	1.65607	1.57629
1.02002	3.46484	0.712102	2.45623	NaN	NaN	0.904732	0.0146515	1.02088	0.312283	++	+	+		++	+	+					0.00107315	77.912	41709000	1	77.912	0.16733	0.0371413	0.192721	0.409327	1.40014	5	0.150995	0.388581	-4.92274	4.95204	1	0.04747	0.217876	0.460809	1.58095	5	0.192129	0.438325	-5.25717	5.88173	1	1.28466	0.659633	1.27655
1.33622	3.08432	1.50008	1.53134	NaN	NaN	0.740564	-0.490038	0.912273	-0.727797	++	+	+		++	+	+	-				3.18e-07	139.97	8464100000	1	107.1	0.020362	0.0371413	0.192721	0.24516	1.23597	5	0.0460981	0.214705	-1.08615	0.106077	4	0.04747	0.217876	0.352204	1.47234	5	0.0557776	0.236173	-1.38352	-0.072076	4	0.466733	0.257538	1.13705
1.44616	2.32307	0.550477	1.83576	NaN	NaN	1.85312	0.673257	2.04426	1.62827	++	+	+	+			+	+				0.00250731	82.279	483430000	1	67.897	0.23046	0.0371413	0.192721	1.35772	2.34853	5	0.0460982	0.214705	0.0771403	1.26937	4	0.04747	0.217876	1.48419	2.60433	5	0.0557778	0.236173	0.972546	2.28399	4	2.54776	2.39127	2.60757
0.573092	2.29616	0.586972	2.26231	NaN	NaN	0.981068	0.318891	2.37021	1.6974	++	+	+		++	+	+	+				2.13e-65	257.37	153330000	1	242.94	-1.2038	0.0371413	0.192721	0.485664	1.47647	5	0.0858584	0.293016	-0.941855	1.57964	2	0.04747	0.217876	1.81014	2.93028	5	0.105854	0.325352	0.297529	3.09728	2	1.0601	1.38827	1.031
1.05226	3.01439	0.299349	1.16102	NaN	NaN	2.29644	1.33571	2.56279	2.29378	++	+	+	+			+	+				1.08e-36	194.25	19750000000	1	186.83	-2.2808	0.0371413	0.192721	1.80103	2.79184	5	0.0374333	0.193477	0.838362	1.83306	5	0.04747	0.217876	2.00272	3.12286	5	0.0451113	0.212394	1.7478	2.83976	5	3.10307	2.40028	2.37631
1.21239	3.61366	0.858521	2.42922	NaN	NaN	1.91745	0.854668	2.81293	2.04859	++	+	+	+	++	+	+	+				2.65e-29	207.92	236200000	1	161.24	-2.4246	0.0371413	0.192721	1.42204	2.41285	5	0.0460981	0.214705	0.258552	1.45078	4	0.04747	0.217876	2.25286	3.373	5	0.0557776	0.236173	1.39287	2.70431	4	2.08756	2.19378	2.29971
2.89366	3.00108	3.3	2.98845	NaN	NaN	1.80192	NaN	2.05601	NaN	++	+	+		++	+	+					5.95e-44	181.75	239300000	1	181.75	0.23376	0.0458584	0.214146	1.20735	2.39648	4	NaN	NaN	NaN	NaN	NaN	0.058782	0.24245	1.38286	2.72916	4	NaN	NaN	NaN	NaN	NaN	NaN	1.59571	3.75282
0.510571	2.38503	0.72549	3.99498	NaN	NaN	0.570215	0.138052	1.46788	0.798189	++	+	+		++	+	+	+				1.05e-210	391.06	1612300000	1	391.06	0.53741	0.0371413	0.192721	0.074811	1.06562	5	0.0374333	0.193477	-0.359296	0.6354	5	0.04747	0.217876	0.907809	2.02795	5	0.0451113	0.212394	0.252213	1.34417	5	0.925887	0.490986	0.843609
0.962238	2.17537	-2.74488	2.69042	NaN	NaN	0.919946	0.208594	-2.54936	0.260519	++	+	+			+	-					7.47e-54	226.74	666400000	1	226.74	0.48556	0.0599259	0.244798	0.14089	1.699	3	0.0460981	0.214705	-0.387522	0.80471	4	0.0771789	0.277811	-3.43348	-1.66524	3	0.0557777	0.236173	-0.395203	0.91624	4	0.996074	1.20121	1.08361
2.54755	2.03947	0.0570424	0.283428	NaN	NaN	4.25568	1.92308	0.0428982	0.0261556	++	+	+	+								1.45e-06	139.54	3411200000	1	84.896	-0.99452	0.0458584	0.214146	3.66111	4.85024	4	0.0374333	0.193477	1.42573	2.42042	5	0.058782	0.24245	-0.630251	0.716047	4	0.0451113	0.212394	-0.519821	0.572132	5	4.76537	3.97255	4.84044
1.49903	5.09639	0.13075	0.157518	NaN	NaN	2.31864	0.937591	2.14505	2.04	++	+	+	+			+	+				2.44e-269	440.68	4005600000	1	416.22	-2.0369	0.0371413	0.192721	1.82324	2.81405	5	0.0374333	0.193477	0.440243	1.43494	5	0.04747	0.217876	1.58498	2.70512	5	0.0451113	0.212394	1.49402	2.58597	5	2.41675	2.71315	2.79257
0.835239	2.57412	1.49016	4.09236	NaN	NaN	0.734226	0.105394	1.51927	0.247397	++	+	+		++	+	+					0.00128253	109.44	280720000	1	109.44	0.72222	0.0458584	0.214146	0.139662	1.32879	4	0.0460981	0.214705	-0.490722	0.701509	4	0.0587819	0.24245	0.846122	2.19242	4	0.0557776	0.236173	-0.408324	0.903118	4	0.858459	0.822715	1.01987
0.950134	2.54457	1.12315	4.48455	NaN	NaN	1.093	0.241717	1.25212	0.203387	++	+	+		++	+	+					5.7e-07	159.11	27336000000	1	59.542	0.32825	0.0371413	0.192721	0.597599	1.58841	5	0.0374333	0.193477	-0.255631	0.739065	5	0.04747	0.217876	0.692048	1.81218	5	0.0451113	0.212394	-0.342589	0.749364	5	1.36858	1.75852	1.44266
0.55434	2.50974	0.671397	3.63111	NaN	NaN	0.758724	0.283305	1.39898	0.781477	++	+	+		++	+	+	+				0	465.72	3557300000	1	383.15	0.90434	0.0371413	0.192721	0.26332	1.25413	5	0.0374333	0.193477	-0.214043	0.780653	5	0.04747	0.217876	0.838909	1.95905	5	0.0451113	0.212394	0.2355	1.32745	5	1.32242	0.763545	0.969307
0.582522	2.12915	0.161801	0.29578	NaN	NaN	0.593949	0.176792	1.31608	1.25462	++	+	+				+	+				1.04e-68	281.6	3385600000	1	245.18	-0.29454	0.0371413	0.192721	0.0985443	1.08935	5	0.0460981	0.214705	-0.419324	0.772908	4	0.04747	0.217876	0.756012	1.87615	5	0.0557776	0.236173	0.598904	1.91035	4	1.02498	0.448514	0.52543
0.814691	2.36187	0.86493	1.45873	NaN	NaN	1.7757	1.06189	2.33255	1.54933	++	+	+	+			+	+				3.52e-05	99.069	193640000	1	99.069	-0.042224	0.0458584	0.214146	1.18114	2.37026	4	0.0374333	0.193477	0.564538	1.55923	5	0.058782	0.24245	1.6594	3.0057	4	0.0451113	0.212394	1.00336	2.09531	5	1.9943	2.18898	NaN
1.10305	4.61523	0.662618	2.83131	NaN	NaN	0.702637	-0.371291	1.34974	0.623643	++	+	+		++	+	+					2.77e-14	183.57	156510000	1	171.92	-0.61647	0.0371413	0.192721	0.207232	1.19804	5	0.0460981	0.214705	-0.967406	0.224825	4	0.04747	0.217876	0.789669	1.90981	5	0.0557776	0.236173	-0.0320778	1.27936	4	1.14272	0.662979	0.752745
0.499684	2.99496	0.315423	2.4669	NaN	NaN	0.753324	0.329355	1.89397	1.61385	++	+	+				+	+				1.99e-34	239.55	58621000000	1	80.31	0.064223	0.0371413	0.192721	0.25792	1.24873	5	0.0374333	0.193477	-0.167992	0.826703	5	0.04747	0.217876	1.3339	2.45403	5	0.0451113	0.212394	1.06787	2.15982	5	1.01185	0.729288	1.05013
1.50678	8.16568	1.33091	7.75925	NaN	NaN	0.96254	-0.410675	1.2798	0.0321365	++	+	+		++	+	+					2.67e-44	252.14	8284100000	1	252.14	-0.029944	0.0371413	0.192721	0.467135	1.45794	5	0.0374333	0.193477	-0.908023	0.0866725	5	0.04747	0.217876	0.719728	1.83987	5	0.0451113	0.212394	-0.51384	0.578113	5	1.24495	1.11454	1.15253
1.29943	3.94536	1.10317	1.45628	NaN	NaN	0.599744	-0.574463	1.3924	0.361894	++	+	+	-			+					2.35e-05	152.37	11146000000	1	139.39	0.31798	0.0371413	0.192721	0.10434	1.09515	5	0.0374333	0.193477	-1.07181	-0.0771153	5	0.04747	0.217876	0.832336	1.95247	5	0.0451113	0.212394	-0.184083	0.90787	5	0.898387	0.500874	0.899082
0.763021	2.23354	-0.148133	0.0925718	NaN	NaN	1.13649	0.460646	1.72224	1.88668	++	+	+				+	+				5.71e-80	270.95	181580000	1	270.95	-0.40729	0.0371413	0.192721	0.641082	1.63189	5	0.0374333	0.193477	-0.0367023	0.957994	5	0.04747	0.217876	1.16217	2.28231	5	0.0451113	0.212394	1.3407	2.43265	5	1.47212	0.95581	1.71394
3.50235	4.62727	3.41923	6.31408	NaN	NaN	2.27774	NaN	2.6911	NaN	++	+	+		++	+	+					6.28e-21	190.26	70930000	1	190.26	-0.16663	0.0458584	0.214146	1.68317	2.8723	4	NaN	NaN	NaN	NaN	NaN	0.058782	0.24245	2.01795	3.36425	4	NaN	NaN	NaN	NaN	NaN	2.55236	2.17727	2.80088
1.46207	4.24965	0.650769	2.96676	NaN	NaN	1.11055	-0.204584	1.85218	1.27262	++	+	+		++	+	+	+				1.71e-05	121.41	83252000	1	115.42	0.85443	0.0458584	0.214146	0.515989	1.70512	4	0.0374333	0.193477	-0.701932	0.292764	5	0.058782	0.24245	1.17903	2.52533	4	0.0451113	0.212394	0.726648	1.8186	5	1.18474	1.05398	1.29253
1.94105	2.19541	4.44095	4.51681	NaN	NaN	1.13402	NaN	2.36556	NaN	++	+	+		++	+	+					1.09e-206	379.85	48128000	1	379.85	-0.91365	0.0599259	0.244798	0.354967	1.91308	3	NaN	NaN	NaN	NaN	NaN	0.0771789	0.277811	1.48144	3.24968	3	NaN	NaN	NaN	NaN	NaN	1.95019	1.68765	NaN
0.756361	2.28205	0.178561	0.138496	NaN	NaN	1.25501	0.622726	1.3187	1.28168	++	+	+	+			+	+				4.58e-115	320.78	249790000	1	115.53	2.1515	0.0371413	0.192721	0.759604	1.75041	5	0.0460981	0.214705	0.0266106	1.21884	4	0.04747	0.217876	0.758628	1.87876	5	0.0557777	0.236173	0.62596	1.9374	4	1.84254	1.25005	1.53872
0.833144	2.05408	0.600218	2.46068	NaN	NaN	0.675325	0.0548415	1.95183	1.38145	++	+	+		++	+	+					7.22e-08	140.78	83206000	1	140.78	-0.57554	0.0371413	0.192721	0.179921	1.17073	5	0.0858583	0.293016	-1.2059	1.31559	2	0.04747	0.217876	1.39176	2.5119	5	0.105854	0.325351	-0.0184249	2.78132	2	0.732051	0.669326	1.46758
2.01661	3.87938	0.126428	0.456287	NaN	NaN	1.61574	-0.244112	-0.287889	-0.373279	++	+	+									6.26e-08	123.03	270890000	1	43.991	1.3958	0.0371413	0.192721	1.12034	2.11115	5	0.0374333	0.193477	-0.74146	0.253236	5	0.04747	0.217876	-0.847957	0.27218	5	0.0451113	0.212394	-0.919255	0.172698	5	1.15293	2.13365	2.19602
1.70909	2.04223	1.33345	1.58682	NaN	NaN	1.90008	0.326192	3.35741	2.09405	++	+	+		++	+	+	+				2.66e-07	146.57	242650000	1	133.44	-0.21118	0.0371413	0.192721	1.40467	2.39548	5	0.0374333	0.193477	-0.171156	0.82354	5	0.04747	0.217876	2.79734	3.91748	5	0.0451113	0.212394	1.54808	2.64003	5	2.66655	2.18302	2.01027
1.52824	3.90953	1.92672	5.32345	NaN	NaN	1.10283	NaN	1.55347	NaN	++	+	+		++	+	+					2.49e-08	152.67	129360000	1	152.67	-0.27339	0.0458584	0.214146	0.508265	1.69739	4	NaN	NaN	NaN	NaN	NaN	0.0587819	0.24245	0.880325	2.22662	4	NaN	NaN	NaN	NaN	NaN	1.66679	1.31335	1.08224
2.94557	4.92392	4.76196	6.47828	NaN	NaN	2.03661	NaN	3.64048	NaN	++	+	+		++	+	+					8.75e-112	303.05	485250000	1	303.05	0.14519	0.0371413	0.192721	1.54121	2.53202	5	NaN	NaN	NaN	NaN	NaN	0.04747	0.217876	3.08041	4.20055	5	NaN	NaN	NaN	NaN	NaN	2.72447	1.71598	2.76873
1.05922	1.8361	-2.11791	3.06507	NaN	NaN	1.31172	NaN	-1.35873	NaN	++	+	+			+	-					3.07e-60	248.67	134070000	1	248.67	0.14649	0.0599259	0.244798	0.532662	2.09077	3	NaN	NaN	NaN	NaN	NaN	0.077179	0.277811	-2.24285	-0.474614	3	NaN	NaN	NaN	NaN	NaN	1.54309	NaN	NaN
1.8666	4.12785	1.2031	4.19915	NaN	NaN	2.62125	0.891226	3.79672	2.65526	++	+	+	+	++	+	+	+				1.87e-13	159.5	498710000	1	52.5	-0.59734	0.0371413	0.192721	2.12585	3.11666	5	0.0374333	0.193477	0.393878	1.38857	5	0.04747	0.217876	3.23665	4.35679	5	0.0451113	0.212394	2.10929	3.20124	5	2.65303	2.52028	3.38296
2.72365	4.42664	1.79271	1.94454	NaN	NaN	3.46696	NaN	2.99772	NaN	++	+	+		++	+	+					1.56e-08	152.17	600370000	1	49.463	0.62374	0.0371413	0.192721	2.97155	3.96236	5	NaN	NaN	NaN	NaN	NaN	0.04747	0.217876	2.43765	3.55779	5	NaN	NaN	NaN	NaN	NaN	3.45781	3.94354	4.28891
1.84675	4.02728	1.13438	2.63471	NaN	NaN	1.70523	0.213438	1.4533	0.659266	++	+	+		++	+	+					1.14e-08	149.82	793480000	1	49.463	0.62374	0.0371413	0.192721	1.20982	2.20063	5	0.150996	0.388582	-4.72396	5.15084	1	0.04747	0.217876	0.893227	2.01336	5	0.19213	0.438326	-4.9102	6.22873	1	2.41941	1.61266	1.52964
1.71523	3.63997	1.52106	3.72971	NaN	NaN	1.52265	-0.0527979	1.86546	0.432149	++	+	+		++	+	+					1.54e-22	167.87	560240000	1	79.311	0.74768	0.0371413	0.192721	1.02725	2.01806	5	0.0374333	0.193477	-0.550146	0.44455	5	0.04747	0.217876	1.30539	2.42553	5	0.0451113	0.212394	-0.113828	0.978125	5	1.64263	1.24297	1.93991
1.4637	3.94243	1.40482	3.46927	NaN	NaN	1.23623	-0.0995252	1.62925	0.308657	++	+	+		++	+	+					3.6e-08	114.83	544740000	1	79.311	0.74768	0.0371413	0.192721	0.74083	1.73164	5	0.0374333	0.193477	-0.596873	0.397823	5	0.04747	0.217876	1.06919	2.18932	5	0.0451113	0.212394	-0.237319	0.854634	5	1.97377	1.12551	1.29733
1.03782	2.98364	1.52458	2.69973	NaN	NaN	1.79268	0.851143	2.96468	1.52098	++	+	+	+	++	+	+	+				1.67e-14	162.72	10247000000	1	53.136	0.62124	0.0371413	0.192721	1.29728	2.28808	5	0.0374333	0.193477	0.353795	1.34849	5	0.04747	0.217876	2.40461	3.52475	5	0.0451113	0.212394	0.975007	2.06696	5	2.16912	1.3473	2.21262
0.592735	2.51115	0.507613	2.48242	NaN	NaN	1.96759	1.44259	2.60395	2.13544	++	+	+	+	++	+	+	+				9.39e-61	272.54	329420000000	1	272.54	-0.80017	0.0371413	0.192721	1.47218	2.46299	5	0.0374333	0.193477	0.94524	1.93994	5	0.04747	0.217876	2.04388	3.16402	5	0.0451113	0.212394	1.58947	2.68142	5	2.24391	2.16628	2.35282
0.939373	2.27528	0.933397	2.35299	NaN	NaN	2.18593	1.60938	2.37221	1.67308	++	+	+		++	+	+					4.61e-08	130.99	4042000000	1	104.94	-0.33158	0.0371413	0.192721	1.69052	2.68133	5	0.150995	0.388581	-3.32801	6.54678	1	0.04747	0.217876	1.81214	2.93227	5	0.192129	0.438325	-3.89637	7.24254	1	2.29648	2.32184	2.66561
0.694742	2.36385	0.52686	1.55323	NaN	NaN	2.11848	1.49588	2.70288	2.21533	++	+	+	+			+	+				9.37e-13	165.51	245750000	1	159.66	-1.212	0.0371413	0.192721	1.62307	2.61388	5	0.0374333	0.193477	0.998536	1.99323	5	0.04747	0.217876	2.14281	3.26295	5	0.0451113	0.212394	1.66935	2.76131	5	2.55337	1.93638	2.55403
1.71853	1.86346	0.955621	1.55214	NaN	NaN	3.65098	2.04869	3.13662	2.23613	++	+	+	+			+	+				1.82e-40	207.55	4155100000	1	43.622	-1.1192	0.0371413	0.192721	3.15557	4.14638	5	0.0374333	0.193477	1.55134	2.54604	5	0.04747	0.217876	2.57655	3.69669	5	0.0451113	0.212394	1.69015	2.7821	5	3.61049	3.40695	4.03648
1.98473	4.26064	2.42437	3.15233	NaN	NaN	1.30957	NaN	1.45848	NaN	++	+	+		++	+	+					6.87e-19	172.85	43059000	1	172.85	-1.1612	0.0599259	0.244798	0.530516	2.08863	3	NaN	NaN	NaN	NaN	NaN	0.077179	0.277811	0.574364	2.3426	3	NaN	NaN	NaN	NaN	NaN	1.69516	NaN	NaN
1.53164	2.81958	0.202962	0.475981	NaN	NaN	2.06732	0.658409	0.427388	0.264217	++	+	+	+								2.01e-35	212.03	1428200000	1	212.03	1.1963	0.0371413	0.192721	1.57191	2.56272	5	0.0374333	0.193477	0.161061	1.15576	5	0.04747	0.217876	-0.13268	0.987456	5	0.0451113	0.212394	-0.28176	0.810193	5	2.97076	2.45457	1.85777
2.75507	3.00764	4.60348	4.21843	NaN	NaN	1.99757	NaN	2.83228	NaN	++	+	+		++	+	+					7.61e-15	166.98	85451000	1	166.98	-0.45855	0.0599259	0.244798	1.21851	2.77662	3	NaN	NaN	NaN	NaN	NaN	0.0771789	0.277811	1.94816	3.7164	3	NaN	NaN	NaN	NaN	NaN	1.64403	3.01974	NaN
4.62266	6.50502	3.62643	4.71366	NaN	NaN	3.7279	-0.450491	2.85609	0.118695	++	+	+		++	+	+					0.00593546	85.212	221610000	1	75.109	-0.52984	0.0458584	0.214146	3.13333	4.32246	4	0.150996	0.388582	-5.38789	4.48691	1	0.058782	0.24245	2.18294	3.52924	4	0.19213	0.438326	-5.45076	5.68815	1	4.72051	NaN	3.82639
4.5158	6.22801	2.66192	3.80461	NaN	NaN	3.7279	-0.450491	2.85609	0.118695	++	+	+		++	+	+					0.00593546	85.212	221610000	1	75.109	-0.52984	0.0458584	0.214146	3.13333	4.32246	4	0.150996	0.388582	-5.38789	4.48691	1	0.058782	0.24245	2.18294	3.52924	4	0.19213	0.438326	-5.45076	5.68815	1	4.72051	NaN	3.82639
2.68914	7.17665	1.94493	7.40575	NaN	NaN	1.28636	-1.20216	1.03556	-0.797942	++	+	+	-	++	+	+	-				1.45e-48	202.61	699510000	1	202.61	-0.062707	0.0371413	0.192721	0.790959	1.78177	5	0.0374333	0.193477	-1.69951	-0.704815	5	0.04747	0.217876	0.475491	1.59563	5	0.0451113	0.212394	-1.34392	-0.251966	5	1.56493	1.48374	1.22045
0.898	3.04555	1.365	5.57671	NaN	NaN	0.538091	-0.25799	0.529845	-0.745641	++	+	+		+	+		-				3.08e-215	387.63	980040000	1	290.05	-0.14977	0.0371413	0.192721	0.0426872	1.0335	5	0.0374333	0.193477	-0.755338	0.239358	5	0.04747	0.217876	-0.0302239	1.08991	5	0.0451113	0.212394	-1.29162	-0.199664	5	0.818208	0.45037	0.835109
0.750705	4.48066	0.898284	2.04437	NaN	NaN	1.02174	0.402065	1.01079	0.415309	++	+	+		++	+	+					1.02e-41	202.85	523730000	1	202.85	0.13279	0.0371413	0.192721	0.526336	1.51714	5	0.0460982	0.214705	-0.194052	0.998181	4	0.04747	0.217876	0.450721	1.57086	5	0.0557778	0.236173	-0.240413	1.07103	4	1.171	1.12724	0.938374
1.3265	3.55494	0.657122	2.5241	NaN	NaN	1.21617	0.0573067	1.11832	0.606985	++	+	+		++	+	+					0.00641715	88.181	1135000000	1	72.638	0.13416	0.0371413	0.192721	0.720762	1.71157	5	0.0460981	0.214705	-0.538809	0.653422	4	0.04747	0.217876	0.558255	1.67839	5	0.0557776	0.236173	-0.0487361	1.26271	4	2.11119	1.14869	0.976853
2.34662	5.13059	2.96406	4.49633	NaN	NaN	1.76487	NaN	2.32437	NaN	++	+	+		++	+	+					0.00513035	86.136	42710000	1	76.064	-0.048283	0.0371413	0.192721	1.26947	2.26028	5	NaN	NaN	NaN	NaN	NaN	0.04747	0.217876	1.7643	2.88443	5	NaN	NaN	NaN	NaN	NaN	1.90329	1.92532	1.78032
0.951685	3.70239	0.550329	1.29587	NaN	NaN	1.25271	0.408406	1.65258	0.899349	++	+	+				+					5.64e-30	201.9	27843000	1	178.51	0.82977	0.0599259	0.244798	0.473657	2.03177	3	0.150995	0.388581	-4.52898	5.3458	1	0.0771789	0.277811	0.768462	2.5367	3	0.192129	0.438325	-4.6701	6.4688	1	1.60182	1.31826	1.44514
2.44424	6.96839	1.47639	2.5393	NaN	NaN	1.60932	NaN	0.294487	NaN	++	+	+		+	+						3.84e-27	194	222470000	1	194	0.67845	0.0371413	0.192721	1.11392	2.10473	5	NaN	NaN	NaN	NaN	NaN	0.04747	0.217876	-0.265581	0.854556	5	NaN	NaN	NaN	NaN	NaN	1.67725	1.53104	1.92885
1.73255	1.67799	0.541355	1.50957	NaN	NaN	1.89111	0.331347	1.29363	0.738947	++	+	+				+	+				9.56e-47	245.18	253660000	1	225.09	-1.6374	0.0371413	0.192721	1.39571	2.38652	5	0.0460982	0.214705	-0.264769	0.927464	4	0.04747	0.217876	0.73356	1.8537	5	0.0557778	0.236173	0.083225	1.39467	4	2.44281	2.74505	2.38006
2.8046	5.06432	3.34106	5.15026	NaN	NaN	2.7008	-0.0366698	2.91943	-0.393204	++	+	+		++	+	+					7.58e-24	206.74	523040000	1	206.74	0.18413	0.0371413	0.192721	2.2054	3.19621	5	0.0599863	0.244921	-0.816118	0.742778	3	0.04747	0.217876	2.35936	3.47949	5	0.0730558	0.270288	-1.25338	0.466974	3	2.88337	2.47295	3.02898
3.07211	1.59969	0.510891	0.507751	NaN	NaN	4.97716	2.0874	0.258411	-0.198262	++	+	+	+								1.39e-35	225.36	3647600000	1	225.36	-0.019676	0.0371413	0.192721	4.48176	5.47257	5	0.0374333	0.193477	1.59006	2.58475	5	0.04747	0.217876	-0.301658	0.818479	5	0.0451113	0.212394	-0.744238	0.347715	5	5.41969	5.01335	5.97249
3.70458	2.39299	1.97251	1.30316	NaN	NaN	3.11905	-0.0934457	2.03043	0.287962	++	+	+				+					1e-15	172.76	192420000	1	43.184	-0.08911	0.0599259	0.244798	2.34	3.89811	3	0.0460981	0.214705	-0.689561	0.50267	4	0.077179	0.277811	1.14632	2.91455	3	0.0557777	0.236173	-0.36776	0.943683	4	2.49395	NaN	3.93267
1.75331	1.77348	1.21834	1.09112	NaN	NaN	2.1637	0.54529	2.63483	1.48622	++	+	+	+			+	+				1.4e-09	157.75	1296300000	1	80.871	2.9986	0.0371413	0.192721	1.66829	2.6591	5	0.0374333	0.193477	0.0479419	1.04264	5	0.04747	0.217876	2.07477	3.1949	5	0.0451113	0.212394	0.94024	2.03219	5	2.98109	2.73996	0.323981
0.702927	3.84598	0.851739	3.43712	NaN	NaN	0.802352	0.186739	1.32881	0.539232	++	+	+		++	+	+					5.48e-06	125.7	642500000	1	80.871	2.9986	0.0371413	0.192721	0.306948	1.29776	5	0.0374333	0.193477	-0.310609	0.684087	5	0.04747	0.217876	0.768741	1.88888	5	0.0451113	0.212394	-0.00674411	1.08521	5	0.784298	0.78891	0.820758
0.865259	1.87517	0.837223	1.58921	NaN	NaN	0.0115024	0.0354841	-0.527465	-0.467775	+	+										1.14e-220	367.39	976160000	1	367.39	-1.6186	0.0458584	0.214146	-0.583062	0.606066	4	0.150995	0.388581	-4.9019	4.97287	1	0.058782	0.24245	-1.20061	0.145684	4	0.192129	0.438325	-6.03722	5.10167	1	NaN	0.151846	0.0216059
0.51815	2.59812	0.28899	1.72619	NaN	NaN	-0.375033	-0.803782	-0.124248	-0.366196	+	+		-								3.04e-118	302.04	2336800000	1	214.02	-0.13845	0.0371413	0.192721	-0.870437	0.120372	5	0.0374333	0.193477	-1.30113	-0.306434	5	0.04747	0.217876	-0.684316	0.435821	5	0.0451113	0.212394	-0.912173	0.17978	5	-0.435794	-0.47985	-0.339985
0.667323	3.2433	0.275379	1.78092	NaN	NaN	-0.40661	-0.975266	-0.81043	-1.03498	+	+		-			-	-				5.85e-271	415.51	3309900000	1	338.83	-0.28226	0.0371413	0.192721	-0.902015	0.0887939	5	0.0374333	0.193477	-1.47261	-0.477918	5	0.04747	0.217876	-1.3705	-0.250362	5	0.0451113	0.212394	-1.58095	-0.489001	5	-0.508578	-0.142086	-0.489186
0.487421	4.34248	0.172247	2.74999	NaN	NaN	0.119104	-0.286263	0.293697	0.160763	+	+										2.12e-19	205.12	83069000000	1	45.718	-0.95352	0.0371413	0.192721	-0.3763	0.614508	5	0.0374333	0.193477	-0.783611	0.211085	5	0.04747	0.217876	-0.266371	0.853766	5	0.0451113	0.212394	-0.385213	0.70674	5	0.190471	0.294232	0.219164
0.48515	2.62267	0.265716	1.27781	NaN	NaN	0.074297	-0.328435	-0.140419	-0.359999	+	+										2.6e-27	196.38	301600000	1	196.38	0.7569	0.0371413	0.192721	-0.421107	0.569701	5	0.0374333	0.193477	-0.825783	0.168913	5	0.04747	0.217876	-0.700487	0.41965	5	0.0451113	0.212394	-0.905976	0.185977	5	0.0192626	0.168327	0.284129
1.32827	5.22035	2.3458	6.66687	NaN	NaN	-0.118107	NaN	-0.137297	NaN	+	+			+	+						3.81e-14	141.43	154020000	1	141.43	-0.20442	0.0371413	0.192721	-0.613512	0.377297	5	NaN	NaN	NaN	NaN	NaN	0.04747	0.217876	-0.697365	0.422772	5	NaN	NaN	NaN	NaN	NaN	0.0560932	-0.0824834	-0.341103
0.810879	3.59472	1.00495	3.17611	NaN	NaN	-0.469449	-1.17238	-0.260321	-1.18632	+	+		-	+	+		-				2.99e-130	330.54	3952300000	1	166.3	0.6527	0.0371413	0.192721	-0.964854	0.0259549	5	0.0374333	0.193477	-1.66973	-0.675033	5	0.04747	0.217876	-0.820389	0.299747	5	0.0451113	0.212394	-1.7323	-0.640347	5	-0.337697	-0.207766	-0.55772
0.632976	2.57273	0.362904	0.913998	NaN	NaN	0.414981	-0.130541	1.59164	1.26803	+	+					+	+				1.81e-09	136.48	347210000	1	109.42	-0.20533	0.0371413	0.192721	-0.080423	0.910386	5	0.0374333	0.193477	-0.627889	0.366807	5	0.04747	0.217876	1.03157	2.15171	5	0.0451113	0.212394	0.722055	1.81401	5	0.66858	0.220687	0.700247
0.455115	2.58716	-0.0521108	0.152435	NaN	NaN	-0.232743	-0.626163	-0.261323	-0.263111	+	+		-								9.13e-08	142.83	482790000	1	142.83	-0.04548	0.0371413	0.192721	-0.728147	0.262662	5	0.0460981	0.214705	-1.22228	-0.0300476	4	0.04747	0.217876	-0.821392	0.298745	5	0.0557776	0.236173	-0.918832	0.39261	4	-0.0370641	-0.243753	-0.0354153
0.816203	2.05097	0.313709	0.746108	NaN	NaN	0.58484	0.0698077	1.00492	0.73295	+	+					+					2.75e-19	180.95	47119000	1	150.85	-0.50545	0.0599259	0.244798	-0.194215	1.3639	3	0.150995	0.388581	-4.86758	5.0072	1	0.0771789	0.277811	0.120806	1.88904	3	0.192129	0.438325	-4.8365	6.3024	1	NaN	0.559286	0.61028
0.438442	4.63336	0.702207	4.5731	NaN	NaN	-0.0169606	-0.374758	0.305459	-0.334536	+	+			+	+						1.79e-29	184.96	2164900000	1	83.499	-0.94868	0.0371413	0.192721	-0.512365	0.478444	5	0.0374333	0.193477	-0.872106	0.12259	5	0.04747	0.217876	-0.25461	0.865527	5	0.0451113	0.212394	-0.880512	0.211441	5	0.0163368	0.147148	-0.00124862
0.783785	3.62033	0.962345	5.52825	NaN	NaN	0.176151	-0.508505	1.43581	0.539736	+	+		-	++	+	+					3.46e-12	155.86	833190000	1	145.31	0.53527	0.0371413	0.192721	-0.319254	0.671555	5	0.0374333	0.193477	-1.00585	-0.0111574	5	0.04747	0.217876	0.875737	1.99587	5	0.0451113	0.212394	-0.0062409	1.08571	5	0.408455	0.223628	0.232183
0.712556	2.44406	-0.0751401	0.571577	NaN	NaN	0.344003	-0.275553	-0.342881	-0.235089	+	+										2.44e-45	232.92	2716200000	1	232.92	-0.14368	0.0371413	0.192721	-0.151402	0.839407	5	0.0374333	0.193477	-0.7729	0.221795	5	0.04747	0.217876	-0.902949	0.217188	5	0.0451113	0.212394	-0.781066	0.310887	5	0.137094	0.892333	0.292903
2.02455	6.11521	1.36244	6.79236	NaN	NaN	0.0816959	-1.76852	0.901218	-0.37419	+	+		-	++	+	+					7.67e-17	172.33	595290000	1	147.73	0.44967	0.0371413	0.192721	-0.413708	0.5771	5	0.0374333	0.193477	-2.26587	-1.27117	5	0.04747	0.217876	0.341149	1.46129	5	0.0451113	0.212394	-0.920167	0.171786	5	0.342163	0.0844561	0.451159
0.596968	3.78855	0.6886	2.4828	NaN	NaN	0.187493	-0.303735	1.10676	0.616952	+	+			++	+	+					4.48e-64	262.42	3071200000	1	262.42	-0.78651	0.0371413	0.192721	-0.307912	0.682897	5	0.0460981	0.214705	-0.899851	0.29238	4	0.04747	0.217876	0.546689	1.66683	5	0.0557776	0.236173	-0.0387689	1.27267	4	0.421676	0.123597	0.44535
0.522226	4.02335	-0.00795062	0.0576771	NaN	NaN	0.384914	-0.0561414	0.605048	0.642512	+	+					+	+				1.44e-21	186.62	2526000000	1	85.845	-0.43314	0.0371413	0.192721	-0.11049	0.880319	5	0.0374333	0.193477	-0.553489	0.441207	5	0.04747	0.217876	0.0449795	1.16512	5	0.0451113	0.212394	0.0965354	1.18849	5	0.287443	0.604881	0.497182
0.49602	2.45916	0.0238235	0.122096	NaN	NaN	0.424866	0.00800505	1.00674	1.01124	+	+					+	+				8.67e-10	149.35	9471900000	1	80.746	-0.66281	0.0371413	0.192721	-0.0705379	0.920271	5	0.0374333	0.193477	-0.489343	0.505353	5	0.04747	0.217876	0.446671	1.56681	5	0.0451113	0.212394	0.465266	1.55722	5	0.587945	0.500018	0.504734
1.26682	5.98153	0.397697	3.59717	NaN	NaN	-0.268363	-1.40223	0.444609	0.0950346	+	+		-	+	+						9.67e-39	234.49	35311000000	1	234.49	-0.21567	0.0371413	0.192721	-0.763768	0.227041	5	0.0374333	0.193477	-1.89958	-0.904883	5	0.04747	0.217876	-0.11546	1.00468	5	0.0451113	0.212394	-0.450942	0.641011	5	-0.129518	-0.300463	0.0544844
1.1654	7.13229	0.266001	3.01173	NaN	NaN	0.169448	-0.873942	0.546772	0.322533	+	+		-								7.8e-30	193.62	56111000000	1	122.33	0.74903	0.0371413	0.192721	-0.325957	0.664852	5	0.0374333	0.193477	-1.37129	-0.376594	5	0.04747	0.217876	-0.0132961	1.10684	5	0.0451113	0.212394	-0.223444	0.868509	5	0.123224	0.187212	0.283929
0.633885	2.00647	0.404181	1.05696	NaN	NaN	0.296299	-0.248755	0.133217	-0.220572	+	+										5.36e-64	250.64	17518000000	1	50.305	-0.67499	0.0371413	0.192721	-0.199105	0.791703	5	0.0374333	0.193477	-0.746103	0.248593	5	0.04747	0.217876	-0.426851	0.693286	5	0.0451113	0.212394	-0.766549	0.325404	5	0.839881	0.82612	0.0999312
0.735095	2.38565	0.781001	2.43198	NaN	NaN	0.376395	-0.264713	0.203043	-0.511677	+	+			+	+						9.19e-21	180.3	676720000	1	151.99	-0.49719	0.0371413	0.192721	-0.119009	0.8718	5	0.0374333	0.193477	-0.762061	0.232635	5	0.04747	0.217876	-0.357026	0.763111	5	0.0451113	0.212394	-1.05765	0.0343	5	0.388675	0.757044	0.47716
0.937507	1.67858	1.26962	1.37428	NaN	NaN	-0.215534	-1.03389	-0.895381	-1.89934	+	+					-	-				3.57e-41	222.2	258410000	1	222.2	-0.279	0.0371413	0.192721	-0.710938	0.279871	5	0.085858	0.293015	-2.29463	0.226857	2	0.04747	0.217876	-1.45545	-0.335313	5	0.105853	0.325351	-3.29921	-0.499469	2	-0.0741767	-0.10263	-0.187978
0.408477	2.90702	-0.130738	1.22932	NaN	NaN	0.432666	0.0980287	0.80372	0.95738	+	+					+	+				1.97e-108	313.81	3398400000	1	249.3	1.2488	0.0371413	0.192721	-0.0627387	0.92807	5	0.0374333	0.193477	-0.399319	0.595377	5	0.04747	0.217876	0.243651	1.36379	5	0.0451113	0.212394	0.411403	1.50336	5	0.653877	0.506141	0.442677
1.78279	4.8228	1.62411	7.59362	NaN	NaN	-0.350551	-1.96864	-0.629725	-2.14568	+	+		-		+	-	-				1.6e-16	174.87	2891400000	1	146.96	0.86859	0.0371413	0.192721	-0.845956	0.144853	5	0.0374333	0.193477	-2.46598	-1.47129	5	0.04747	0.217876	-1.18979	-0.0696564	5	0.0451113	0.212394	-2.69166	-1.59971	5	-0.300605	-0.145014	0.0146738
0.824243	2.57376	0.679841	1.19868	NaN	NaN	0.515571	NaN	0.687282	NaN	+	+										7.49e-52	211.49	125330000	1	199.76	-0.4855	0.0599259	0.244798	-0.263485	1.29463	3	NaN	NaN	NaN	NaN	NaN	0.077179	0.277811	-0.196837	1.5714	3	NaN	NaN	NaN	NaN	NaN	NaN	NaN	0.965984
0.767803	2.14608	0.834076	3.12053	NaN	NaN	-0.392438	-1.05573	0.315819	-0.450394	+	+		-	+	+						1.69e-07	158.02	6486700000	1	96.668	-0.28321	0.0371413	0.192721	-0.887842	0.102967	5	0.0374333	0.193477	-1.55307	-0.558378	5	0.04747	0.217876	-0.24425	0.875887	5	0.0451113	0.212394	-0.996371	0.0955823	5	0.111342	-0.179111	-0.555495
0.541771	2.38318	0.117884	0.328244	NaN	NaN	-0.216957	-0.669679	0.124046	0.0442007	+	+		-								0	456.23	49071000000	1	196.01	-0.03543	0.0371413	0.192721	-0.712362	0.278447	5	0.0374333	0.193477	-1.16703	-0.172331	5	0.04747	0.217876	-0.436023	0.684114	5	0.0451113	0.212394	-0.501776	0.590177	5	-0.280096	-0.292407	-0.276103
0.738387	3.79268	1.01571	4.20007	NaN	NaN	-0.127216	-0.765804	0.90287	-0.0408505	+	+		-	++	+	+					7.12e-16	209.03	5001600000	1	209.03	-0.2959	0.0371413	0.192721	-0.62262	0.368188	5	0.0374333	0.193477	-1.26315	-0.268456	5	0.04747	0.217876	0.342801	1.46294	5	0.0451113	0.212394	-0.586827	0.505126	5	-0.0884609	-0.0368361	0.0729585
1.5607	1.81473	1.7646	2.19671	NaN	NaN	0.649315	NaN	1.21343	NaN	+	+			++	+	+					1.44e-55	228.68	9196200	1	163.91	1.4171	0.0599259	0.244798	-0.12974	1.42837	3	NaN	NaN	NaN	NaN	NaN	0.077179	0.277811	0.329315	2.09755	3	NaN	NaN	NaN	NaN	NaN	NaN	NaN	-0.116642
0.451917	4.01554	0.799609	5.71075	NaN	NaN	-0.397219	-0.763446	0.318982	-0.414278	+	+		-	+	+						2.22e-94	295.16	9642200000	1	274.38	-0.28299	0.0371413	0.192721	-0.892623	0.0981854	5	0.0374333	0.193477	-1.26079	-0.266098	5	0.04747	0.217876	-0.241086	0.879051	5	0.0451113	0.212394	-0.960254	0.131699	5	-0.268729	-0.232601	-0.293492
1.12815	3.97089	0.834506	2.98019	NaN	NaN	-0.242862	-1.24663	-0.153045	-0.916677	+	+		-	+	+		-				1.4e-17	188.96	377010000	1	74.173	0.032224	0.0371413	0.192721	-0.738266	0.252543	5	0.0374333	0.193477	-1.74398	-0.749283	5	0.04747	0.217876	-0.713114	0.407023	5	0.0451113	0.212394	-1.46265	-0.3707	5	0.0601522	-0.0851929	0.084471
1.09566	4.4339	0.997823	4.23809	NaN	NaN	0.272599	-0.706369	0.769307	-0.156449	+	+		-	++	+	+					0	461.61	13457000000	1	426.4	-0.27755	0.0371413	0.192721	-0.222806	0.768003	5	0.0374333	0.193477	-1.20372	-0.209021	5	0.04747	0.217876	0.209239	1.32938	5	0.0451113	0.212394	-0.702425	0.389528	5	0.314374	0.185381	0.360985
0.960181	4.70592	0.950642	4.27332	NaN	NaN	-0.168655	-1.01532	0.163595	-0.71316	+	+		-	+	+		-				1.11e-95	302.2	12769000000	1	257.8	-0.52715	0.0371413	0.192721	-0.66406	0.326749	5	0.0374333	0.193477	-1.51267	-0.517973	5	0.04747	0.217876	-0.396474	0.723663	5	0.0451113	0.212394	-1.25914	-0.167183	5	-0.0670101	-0.189296	-0.114215
1.3147	1.5692	-0.00902119	0.00699904	NaN	NaN	-0.360297	-1.58007	-0.953569	-0.972954	+	+		-			-	-				2.2e-49	237.48	565450000	1	193.64	0.061119	0.0371413	0.192721	-0.855701	0.135108	5	0.0460981	0.214705	-2.17619	-0.983959	4	0.04747	0.217876	-1.51364	-0.393501	5	0.0557776	0.236173	-1.62868	-0.317233	4	0.528664	0.421595	-1.38318
0.654842	4.06992	0.819879	4.92386	NaN	NaN	0.0321702	-0.529643	0.369267	-0.383705	+	+		-	+	+						0.000103668	133.58	278150000	1	115.7	-0.0094324	0.0371413	0.192721	-0.463234	0.527575	5	0.0374333	0.193477	-1.02699	-0.0322946	5	0.04747	0.217876	-0.190801	0.929336	5	0.0451113	0.212394	-0.929682	0.162271	5	0.302326	0.250989	-0.0440181
0.714312	2.69274	1.12784	3.27663	NaN	NaN	0.238479	-0.381551	0.499743	-0.548673	+	+			+	+		-				6.67e-162	353.22	1082000000	1	293.22	-0.73954	0.0371413	0.192721	-0.256926	0.733883	5	0.0374333	0.193477	-0.878899	0.115797	5	0.04747	0.217876	-0.0603259	1.05981	5	0.0451113	0.212394	-1.09465	-0.0026962	5	0.412272	0.489483	0.286091
0.520412	2.37072	0.429199	1.52973	NaN	NaN	-0.0673278	-0.349556	0.0363546	-0.127436	+	+										5.32e-06	127.03	91407000	1	127.03	2.3312	0.0458584	0.214146	-0.661892	0.527236	4	0.0858585	0.293016	-1.6103	0.91119	2	0.058782	0.24245	-0.636794	0.709504	4	0.105854	0.325352	-1.52731	1.27244	2	-0.108563	0.223637	NaN
0.760857	2.32892	0.370663	1.77801	NaN	NaN	0.0432155	-0.6184	0.845394	0.519124	+	+		-			+					7.89e-28	201.06	680490000	1	191.52	0.32617	0.0371413	0.192721	-0.452189	0.53862	5	0.0374333	0.193477	-1.11575	-0.121052	5	0.04747	0.217876	0.285325	1.40546	5	0.0451113	0.212394	-0.0268525	1.0651	5	0.166631	0.127455	0.242589
0.38733	3.24333	1.12208	6.99605	NaN	NaN	-0.0619809	-0.371219	1.01896	-0.0272604	+	+			++	+	+					1.11e-44	231.66	4685900000	1	231.66	0.080678	0.0371413	0.192721	-0.557385	0.433423	5	0.0374333	0.193477	-0.868567	0.126129	5	0.04747	0.217876	0.45889	1.57903	5	0.0451113	0.212394	-0.573237	0.518716	5	0.208846	0.0464028	-0.0375116
0.657894	2.76095	0.317467	2.84915	NaN	NaN	-0.434776	-0.994251	0.870527	0.594986	+	+		-			+	+				1.53e-20	177.38	2485600000	1	136.24	0.4131	0.0371413	0.192721	-0.93018	0.0606284	5	0.0374333	0.193477	-1.4916	-0.496903	5	0.04747	0.217876	0.310459	1.4306	5	0.0451113	0.212394	0.0490096	1.14096	5	-0.22868	-0.466039	-0.191605
0.672685	3.80934	0.603244	1.46022	NaN	NaN	0.0654831	-0.267452	0.397846	0.00335356	+	+										1.32e-15	160.22	68413000	1	160.22	-0.38592	0.0458584	0.214146	-0.529081	0.660047	4	0.150995	0.388581	-5.20485	4.66994	1	0.0587819	0.24245	-0.275303	1.07099	4	0.192129	0.438325	-5.5661	5.57281	1	0.133842	0.105766	0.17907
1.75856	4.93789	1.53074	2.87702	NaN	NaN	0.313313	-1.43246	0.315821	-1.08418	+	+		-	+	+		-				1.36e-12	158.04	584540000	1	158.04	0.27115	0.0371413	0.192721	-0.182091	0.808717	5	0.0599863	0.244921	-2.21191	-0.653017	3	0.04747	0.217876	-0.244248	0.875889	5	0.0730558	0.270288	-1.94436	-0.223999	3	0.76692	0.308113	0.377093
0.545793	2.83887	0.259474	0.398299	NaN	NaN	-0.0907966	-0.548706	-0.021075	-0.235446	+	+		-								1.48e-05	137.85	266760000	1	137.85	-0.01348	0.0371413	0.192721	-0.586201	0.404608	5	0.0374333	0.193477	-1.04605	-0.0513581	5	0.04747	0.217876	-0.581143	0.538993	5	0.0451113	0.212394	-0.781422	0.310531	5	0.00501729	-0.110177	0.0608311
0.862744	2.64168	0.745283	3.40636	NaN	NaN	0.189263	-0.569779	0.426984	-0.254995	+	+		-	+	+						2.2e-19	181.08	586380000	1	181.08	-0.5405	0.0371413	0.192721	-0.306141	0.684668	5	0.0374333	0.193477	-1.06713	-0.072431	5	0.04747	0.217876	-0.133084	0.987052	5	0.0451113	0.212394	-0.800971	0.290982	5	0.363282	0.272905	0.323222
1.33037	2.0648	0.865134	0.926569	NaN	NaN	0.307563	-0.851392	0.0333866	-0.666072	+	+		-								9.57e-19	181.51	260050000	1	157.42	0.30739	0.0371413	0.192721	-0.187842	0.802967	5	0.0599862	0.244921	-1.63084	-0.0719449	3	0.04747	0.217876	-0.526682	0.593455	5	0.0730557	0.270288	-1.52625	0.194106	3	0.519585	0.123365	0.420599
0.890557	2.46559	0.929175	2.09573	NaN	NaN	-0.144507	-0.287785	-0.220605	-0.27514	+	+			+	+						2.19e-45	244	134050000	1	244	-0.2077	0.0371413	0.192721	-0.639912	0.350897	5	0.150995	0.388581	-5.22517	4.6496	1	0.04747	0.217876	-0.780673	0.339463	5	0.192129	0.438325	-5.84459	5.29431	1	-0.407011	-0.0513885	-0.100891
0.743357	1.99672	-0.0761429	0.230921	NaN	NaN	0.0367696	-0.602528	0.0577661	0.0636875	+	+										5.07e-66	223.1	188160000	1	223.1	0.096512	0.0458584	0.214146	-0.557794	0.631333	4	0.0599864	0.244921	-1.38198	0.176921	3	0.058782	0.24245	-0.615383	0.730915	4	0.0730559	0.270288	-0.796491	0.923866	3	NaN	0.162848	0.0596957
0.559735	2.34707	0.559147	1.78774	NaN	NaN	-0.0714939	-0.412642	-0.378726	-0.890716	+	+						-				0.000158733	107.98	83455000	1	48.848	-2.0077	0.0458584	0.214146	-0.666058	0.52307	4	0.0599862	0.244921	-1.19209	0.366805	3	0.0587819	0.24245	-1.05188	0.294422	4	0.0730557	0.270288	-1.75089	-0.0305383	3	0.0213192	0.134058	-0.241237
0.836591	2.29494	1.95105	6.1428	NaN	NaN	0.232731	-0.502205	1.504	-0.338341	+	+		-	++	+	+					4.16e-21	184	1195300000	1	184	-0.010237	0.0371413	0.192721	-0.262673	0.728136	5	0.0374333	0.193477	-0.999553	-0.00485742	5	0.04747	0.217876	0.943935	2.06407	5	0.0451113	0.212394	-0.884318	0.207636	5	0.713399	0.118184	0.473641
0.448444	2.97164	0.0621388	0.331175	NaN	NaN	0.145227	-0.223782	0.442154	0.413606	+	+										2.5e-54	249.04	796100000	1	249.04	0.042397	0.0371413	0.192721	-0.350177	0.640632	5	0.0374333	0.193477	-0.72113	0.273566	5	0.04747	0.217876	-0.117915	1.00222	5	0.0451113	0.212394	-0.13237	0.959583	5	0.195837	0.287058	0.482802
1.11396	3.88307	0.549644	3.56915	NaN	NaN	-0.405253	-1.39387	0.080452	-0.412157	+	+		-	+	+						8.3e-81	284.12	27396000000	1	187.16	0.36124	0.0371413	0.192721	-0.900657	0.0901517	5	0.0374333	0.193477	-1.89122	-0.896524	5	0.04747	0.217876	-0.479616	0.64052	5	0.0451113	0.212394	-0.958134	0.133819	5	-0.473886	-0.609104	-0.377512
0.755011	2.18575	0.529548	1.00962	NaN	NaN	-0.133331	-0.852639	0.111141	-0.304311	+	+										5.8e-08	132.79	120290000	1	53.516	0.020078	0.0458584	0.214146	-0.727894	0.461233	4	0.0858583	0.293016	-2.11338	0.408107	2	0.0587819	0.24245	-0.562008	0.78429	4	0.105854	0.325351	-1.70419	1.09556	2	-0.0619356	0.028402	-0.118142
0.47934	2.734	0.2713	1.72032	NaN	NaN	-0.337978	-0.73065	0.0316565	-0.194364	+	+		-								6.76e-136	326.8	643490000	1	326.8	-0.12467	0.0371413	0.192721	-0.833382	0.157426	5	0.0374333	0.193477	-1.228	-0.233302	5	0.04747	0.217876	-0.528412	0.591725	5	0.0451113	0.212394	-0.740341	0.351612	5	-0.360937	-0.505495	-0.320727
0.491223	4.61307	0.962873	7.33472	NaN	NaN	0.337584	-0.0737935	0.874602	-0.0183914	+	+			++	+	+					2.57e-262	418.78	5579800000	1	405.05	-0.061766	0.0371413	0.192721	-0.15782	0.832988	5	0.0374333	0.193477	-0.571142	0.423554	5	0.04747	0.217876	0.314534	1.43467	5	0.0451113	0.212394	-0.564368	0.527585	5	0.422634	0.314362	0.49628
1.46313	1.60262	0.115779	0.0548368	NaN	NaN	0.43651	-0.889795	-0.216766	-0.292422	+	+		-								0.000182131	109.88	620490000	1	52.193	0.051831	0.0371413	0.192721	-0.058894	0.931915	5	0.0374333	0.193477	-1.38714	-0.392447	5	0.04747	0.217876	-0.776834	0.343303	5	0.0451113	0.212394	-0.838399	0.253554	5	0.180741	-1.15908	1.66612
1.15118	2.31421	0.503548	1.10114	NaN	NaN	0.310276	-0.721317	0.122702	-0.326079	+	+		-								3.85e-07	123.75	1112400000	1	70.628	-0.28266	0.0371413	0.192721	-0.185128	0.805681	5	0.0374333	0.193477	-1.21866	-0.223969	5	0.04747	0.217876	-0.437366	0.682771	5	0.0451113	0.212394	-0.872056	0.219897	5	-0.0616474	-0.126476	0.91772
0.739798	2.45411	0.802323	1.59082	NaN	NaN	0.146411	-0.496555	0.728947	-0.00952607	+	+					+					5.74e-26	164.46	2246900000	1	120.33	-0.45093	0.0371413	0.192721	-0.348993	0.641815	5	0.0374333	0.193477	-0.993903	0.000792877	5	0.04747	0.217876	0.168879	1.28902	5	0.0451113	0.212394	-0.555503	0.53645	5	0.441917	0.403435	0.252076
0.627182	2.01597	0.165267	0.590467	NaN	NaN	0.26287	-0.275508	0.150816	0.0254711	+	+										4.04e-23	193.32	5337100000	1	174.46	0.23113	0.0371413	0.192721	-0.232534	0.758275	5	0.0374333	0.193477	-0.772856	0.22184	5	0.04747	0.217876	-0.409252	0.710885	5	0.0451113	0.212394	-0.520505	0.571448	5	0.886022	0.43441	0.480998
1.22677	2.96742	1.56283	1.57539	NaN	NaN	-0.0495973	NaN	-0.118142	NaN	+	+			+	+						3.92e-124	307.82	152650000	1	307.82	-1.1454	0.0599259	0.244798	-0.828653	0.729458	3	NaN	NaN	NaN	NaN	NaN	0.077179	0.277811	-1.00226	0.765977	3	NaN	NaN	NaN	NaN	NaN	NaN	NaN	0.00252696
2.26555	1.47943	2.60147	1.7325	NaN	NaN	0.345771	-1.92474	0.0579469	-2.58085	+	+			+	+						1.1e-07	137.91	55616000	1	137.91	-1.2337	0.0371413	0.192721	-0.149633	0.841175	5	0.150996	0.388582	-6.86214	3.01266	1	0.04747	0.217876	-0.502122	0.618015	5	0.19213	0.438326	-8.15032	2.98861	1	-2.69522	1.25732	1.27044
0.811203	1.98913	-0.0677194	0.0683177	NaN	NaN	-0.304735	-1.00981	-0.874958	-0.770869	+	+		-			-	-				4.97e-15	170.11	1277300000	1	128.31	0.083114	0.0371413	0.192721	-0.80014	0.190669	5	0.0374333	0.193477	-1.50716	-0.512461	5	0.04747	0.217876	-1.43503	-0.314889	5	0.0451113	0.212394	-1.31685	-0.224893	5	-0.607285	0.61255	-0.082128
1.39423	2.69848	1.55898	1.83008	NaN	NaN	0.255661	-1.07778	0.71415	-0.615248	+	+			+	+						1.19e-07	143	136200000	1	139.31	0.80335	0.0599259	0.244798	-0.523395	1.03472	3	0.150995	0.388581	-6.01517	3.8596	1	0.077179	0.277811	-0.169969	1.59827	3	0.192129	0.438325	-6.1847	4.9542	1	0.747292	NaN	NaN
0.646245	3.38505	0.514963	2.28729	NaN	NaN	0.0775182	-0.476717	0.705185	0.241766	+	+			++	+	+					1.26e-145	327.19	11663000000	1	293.12	0.25929	0.0371413	0.192721	-0.417886	0.572923	5	0.0374333	0.193477	-0.974065	0.0206306	5	0.04747	0.217876	0.145117	1.26525	5	0.0451113	0.212394	-0.304211	0.787742	5	-0.0246357	0.420221	0.320846
1.88334	6.26995	1.5878	8.13172	NaN	NaN	0.448795	-1.27275	0.366438	-1.12115	+	+		-	+	+		-				4.46e-192	380.74	9108400000	1	380.74	0.45867	0.0371413	0.192721	-0.0466097	0.944199	5	0.0374333	0.193477	-1.77009	-0.775399	5	0.04747	0.217876	-0.19363	0.926507	5	0.0451113	0.212394	-1.66713	-0.575172	5	0.561244	0.484148	0.867241
1.65619	7.63697	1.82867	5.97493	NaN	NaN	0.396095	-1.11128	0.385754	-1.33238	+	+		-	+	+		-				9.2e-21	188.39	2091100000	1	96.562	-0.35323	0.0371413	0.192721	-0.0993093	0.891499	5	0.0374333	0.193477	-1.60863	-0.613931	5	0.04747	0.217876	-0.174315	0.945822	5	0.0451113	0.212394	-1.87836	-0.786408	5	0.469059	0.337842	0.626027
1.34393	5.34316	1.88326	9.355	NaN	NaN	0.242387	-0.969679	0.346314	-1.4238	+	+		-	+	+		-				3.62e-82	299.2	9853400000	1	286.09	-0.27838	0.0371413	0.192721	-0.253017	0.737791	5	0.0374333	0.193477	-1.46703	-0.472331	5	0.04747	0.217876	-0.213755	0.906382	5	0.0451113	0.212394	-1.96977	-0.87782	5	0.429863	0.336573	0.584693
0.53385	2.71072	1.19128	4.66395	NaN	NaN	0.0445196	-0.458475	0.609264	-0.590178	+	+			++	+	+					2.52e-45	233.97	1755900000	1	233.97	0.15177	0.0371413	0.192721	-0.450885	0.539924	5	0.0460981	0.214705	-1.05459	0.137641	4	0.04747	0.217876	0.0491959	1.16933	5	0.0557776	0.236173	-1.2459	0.0655432	4	0.372911	0.117041	0.11695
0.569936	3.18551	0.364814	1.29461	NaN	NaN	0.021711	-0.450393	0.922862	0.708991	+	+					+	+				1.84e-21	185.9	130750000	1	185.9	0.29474	0.0371413	0.192721	-0.473693	0.517115	5	0.0460981	0.214705	-1.04651	0.145722	4	0.04747	0.217876	0.362793	1.48293	5	0.0557776	0.236173	0.0532698	1.36471	4	0.346961	0.0401534	-0.139254
1.07746	2.32049	1.09023	1.54655	NaN	NaN	0.0586576	-0.888424	0.55711	-0.508431	+	+		-	+	+						8.97e-11	133.71	85910000	1	66.793	0.53208	0.0371413	0.192721	-0.436747	0.554062	5	0.0599862	0.244921	-1.66787	-0.108977	3	0.0587819	0.24245	-0.116039	1.23026	4	0.0730557	0.270288	-1.36861	0.351746	3	0.789528	-0.273818	0.840477
0.647166	2.87862	0.873592	6.62031	NaN	NaN	0.35259	-0.205579	1.31811	0.507694	+	+			++	+	+					7.77e-17	178.49	1061200000	1	41.401	-0.63318	0.0371413	0.192721	-0.142814	0.847994	5	0.0374333	0.193477	-0.702927	0.291769	5	0.04747	0.217876	0.75804	1.87818	5	0.0451113	0.212394	-0.0382825	1.05367	5	0.0821555	0.65856	0.429279
0.581501	2.34508	0.0427911	0.0821014	NaN	NaN	0.0776679	-0.376992	0.946197	0.932644	+	+					+	+				6.87e-08	134.13	336200000	1	75.911	-0.29104	0.0371413	0.192721	-0.417736	0.573072	5	0.0460982	0.214705	-0.973109	0.219124	4	0.04747	0.217876	0.386128	1.50627	5	0.0557778	0.236173	0.276922	1.58837	4	0.237173	0.203075	0.180479
0.794347	1.90397	0.634599	1.2296	NaN	NaN	-0.110874	-0.80745	-0.494788	-1.06574	+	+		-				-				3.47e-136	324.84	594440000	1	316.88	-0.50379	0.0458584	0.214146	-0.705438	0.483689	4	0.0374333	0.193477	-1.3048	-0.310102	5	0.058782	0.24245	-1.16794	0.178361	4	0.0451113	0.212394	-1.61172	-0.519767	5	0.595032	-0.128094	NaN
2.30948	1.4211	1.84291	1.2718	NaN	NaN	-0.775679	-2.88424	-1.043	-2.76564		+	-	-			-	-				4.38e-27	203.93	2411200000	1	203.93	0.83247	0.0371413	0.192721	-1.27108	-0.280275	5	0.0374333	0.193477	-3.38159	-2.38689	5	0.04747	0.217876	-1.60307	-0.482931	5	0.0451113	0.212394	-3.31162	-2.21966	5	-0.0789781	-1.96838	-0.857605
1.17356	1.90933	0.838243	1.45128	NaN	NaN	-2.16793	-3.19293	-2.56559	-3.3174		+	-	-			-	-				0.000949344	103.8	393350000	1	103.8	-0.27278	0.0371413	0.192721	-2.66333	-1.67253	5	0.0374333	0.193477	-3.69027	-2.69558	5	0.04747	0.217876	-3.12566	-2.00552	5	0.0451113	0.212394	-3.86337	-2.77142	5	-2.69054	-2.64952	-1.21282
1.08896	5.21037	0.884264	5.05004	NaN	NaN	-0.624304	-1.58697	0.390529	-0.424173		+	-	-	+	+						0.000693901	112.11	225800000	1	83.647	0.20782	0.0371413	0.192721	-1.11971	-0.128899	5	0.0374333	0.193477	-2.08432	-1.08962	5	0.04747	0.217876	-0.169539	0.950598	5	0.0451113	0.212394	-0.970149	0.121804	5	-0.652073	-0.596628	-0.614894
1.02873	3.34077	0.894524	2.76345	NaN	NaN	-1.19847	-2.0981	-0.280117	-1.10035		+	-	-	+	+		-				1.16e-49	235.73	6822000000	1	204.48	0.029024	0.0371413	0.192721	-1.69387	-0.703066	5	0.0374333	0.193477	-2.59545	-1.60075	5	0.04747	0.217876	-0.840186	0.279951	5	0.0451113	0.212394	-1.64633	-0.554378	5	-0.905745	-1.8398	-1.07361
0.956969	4.92647	0.401217	1.72066	NaN	NaN	-0.542996	-1.38247	-0.168844	-0.517869		+	-	-								0.00175631	96.171	4097600000	1	45.126	-0.19198	0.0371413	0.192721	-1.0384	-0.0475916	5	0.0374333	0.193477	-1.87981	-0.885119	5	0.04747	0.217876	-0.728912	0.391225	5	0.0451113	0.212394	-1.06385	0.0281073	5	-0.650095	-0.500899	-0.218245
0.92613	1.97634	0.529879	1.04077	NaN	NaN	-0.938906	-1.74497	-0.515162	-0.985062		+	-	-				-				6.02e-139	323.24	1292000000	1	214.19	-0.047214	0.0371413	0.192721	-1.43431	-0.443501	5	0.0374333	0.193477	-2.24231	-1.24762	5	0.04747	0.217876	-1.07523	0.0449064	5	0.0451113	0.212394	-1.53104	-0.439085	5	-1.32545	0.109439	-0.928469
0.885863	2.461	1.03488	2.32302	NaN	NaN	-1.74766	-2.50684	-3.10524	-4.04171		+	-	-		+	-	-				1.3e-107	338.29	13500000000	1	312.87	-0.67422	0.0371413	0.192721	-2.24306	-1.25226	5	0.0374333	0.193477	-3.00419	-2.00949	5	0.04747	0.217876	-3.6653	-2.54517	5	0.0451113	0.212394	-4.58769	-3.49574	5	-1.22205	-1.57788	-1.64738
0.866636	2.91937	1.5859	1.62336	NaN	NaN	-1.64267	-2.19942	0.115211	-1.16004		+	-	-	+	+						4.86e-13	156.13	48922000	1	156.13	-0.1152	0.0599259	0.244798	-2.42172	-0.863611	3	0.0858582	0.293016	-3.46016	-0.938671	2	0.0771789	0.277811	-0.768907	0.999329	3	0.105853	0.325351	-2.55991	0.239836	2	-1.57638	-1.8874	NaN
0.762907	2.34188	0.306169	0.726161	NaN	NaN	-0.681819	-1.34073	0.4516	0.214137		+	-	-								7.61e-11	145.71	201890000	1	145.71	0.59341	0.0371413	0.192721	-1.17722	-0.186415	5	0.0460981	0.214705	-1.93684	-0.74461	4	0.04747	0.217876	-0.108468	1.01167	5	0.0557776	0.236173	-0.441584	0.869858	4	-0.657736	-0.590225	-0.0874682
0.76201	3.12589	0.451599	1.57594	NaN	NaN	-0.789772	-1.44318	-1.2448	-1.63515		+	-	-			-	-				2.26e-130	323.66	907800000	1	320.48	0.10075	0.0371413	0.192721	-1.28518	-0.294368	5	0.0374333	0.193477	-1.94053	-0.945835	5	0.04747	0.217876	-1.80486	-0.684727	5	0.0451113	0.212394	-2.18113	-1.08917	5	-0.866667	-0.802788	-0.907415
0.713534	2.11046	-0.402253	0.393994	NaN	NaN	-3.39847	-3.97722	-3.61281	-3.17121		+	-	-			-	-				5.48e-06	132.25	1224200000	1	69.276	-0.16042	0.0371413	0.192721	-3.89388	-2.90307	5	0.0374333	0.193477	-4.47456	-3.47987	5	0.04747	0.217876	-4.17288	-3.05274	5	0.0451113	0.212394	-3.71719	-2.62523	5	-3.44372	-3.84173	-3.45183
0.675005	2.03766	0.0519884	0.0833621	NaN	NaN	-2.16005	-2.71638	-3.79111	-3.78292		+	-	-			-	-				6.88e-10	157.47	5504700000	1	157.47	0.01684	0.0371413	0.192721	-2.65545	-1.66465	5	0.0374333	0.193477	-3.21372	-2.21903	5	0.04747	0.217876	-4.35117	-3.23104	5	0.0451113	0.212394	-4.3289	-3.23694	5	-2.43902	-2.43584	-1.86254
0.641358	2.76856	0.624953	2.42985	NaN	NaN	-2.18328	-2.70771	-0.919863	-1.47813		+	-	-		+	-	-				0.000156604	124.95	24584000000	1	52.837	-0.11092	0.0371413	0.192721	-2.67869	-1.68788	5	0.0374333	0.193477	-3.20506	-2.21037	5	0.04747	0.217876	-1.47993	-0.359794	5	0.0451113	0.212394	-2.02411	-0.932155	5	-2.32335	-2.42239	-2.09385
0.635721	2.00398	0.231795	0.111685	NaN	NaN	-1.89649	-2.44762	-2.38466	-2.62539		+	-	-			-	-				8.48e-20	167.17	373970000	1	100.73	-0.63801	0.0458584	0.214146	-2.49105	-1.30192	4	0.0374333	0.193477	-2.94496	-1.95027	5	0.058782	0.24245	-3.05781	-1.71151	4	0.0557777	0.236173	-3.28112	-1.96967	4	NaN	-2.01009	-1.71823
0.625115	2.35376	0.747984	3.17814	NaN	NaN	-0.961464	-1.48425	0.244903	-0.438498		+	-	-	+	+						3.74e-35	210.64	546500000	1	179.67	-0.081117	0.0371413	0.192721	-1.45687	-0.46606	5	0.0374333	0.193477	-1.9816	-0.9869	5	0.04747	0.217876	-0.315166	0.804971	5	0.0451113	0.212394	-0.984475	0.107479	5	-0.635756	-1.31876	-0.759505
0.613033	3.53837	0.304634	2.99335	NaN	NaN	-0.559166	-1.07507	-0.772982	-1.02576		+	-	-			-	-				3.13e-07	125.97	1562800000	1	72.031	-1.0134	0.0371413	0.192721	-1.05457	-0.0637614	5	0.0374333	0.193477	-1.57242	-0.577726	5	0.04747	0.217876	-1.33305	-0.212914	5	0.0451113	0.212394	-1.57173	-0.47978	5	-0.696413	-0.423888	-0.352039
0.580898	2.20326	-0.21491	0.533355	NaN	NaN	-0.762581	-1.24601	-0.852283	-0.607529		+	-	-			-	-				1.18e-67	271.04	456980000	1	260.5	-2.0786	0.0371413	0.192721	-1.25799	-0.267177	5	0.0374333	0.193477	-1.74336	-0.748659	5	0.04747	0.217876	-1.41235	-0.292214	5	0.0451113	0.212394	-1.15351	-0.0615527	5	-0.92934	-0.933354	-0.208957
0.553164	2.88411	0.606569	1.80743	NaN	NaN	-0.929882	-1.38537	-1.04823	-1.58809		+	-	-			-	-				0.004826	89.55	1023500000	1	77.058	0.44201	0.0371413	0.192721	-1.42529	-0.434478	5	0.0374333	0.193477	-1.88271	-0.888018	5	0.04747	0.217876	-1.60829	-0.488158	5	0.0451113	0.212394	-2.13406	-1.04211	5	-0.778499	-1.06531	-0.871608
0.546537	2.6686	0.0995776	0.20042	NaN	NaN	-1.06361	-1.51137	-0.370525	-0.4297		+	-	-								1.83e-81	279.5	1960500000	1	258.8	0.15218	0.0371413	0.192721	-1.55901	-0.568206	5	0.0374333	0.193477	-2.00872	-1.01402	5	0.04747	0.217876	-0.930593	0.189544	5	0.0451113	0.212394	-0.975677	0.116276	5	-0.916589	-1.348	-1.05449
0.528141	2.3444	-0.129067	0.391584	NaN	NaN	-1.72709	-2.08831	-2.20283	-2.00435		+	-	-			-	-				1.57e-06	137.78	273960000	1	137.78	-0.048956	0.0371413	0.192721	-2.2225	-1.23169	5	0.0460981	0.214705	-2.68443	-1.49219	4	0.04747	0.217876	-2.7629	-1.64276	5	0.0557777	0.236173	-2.66007	-1.34863	4	-1.56681	-1.97156	-1.63213
0.523835	2.66653	0.127006	0.901184	NaN	NaN	-0.967745	-1.39523	-0.598502	-0.682462		+	-	-			-	-				5.49e-15	170.63	20277000000	1	54.402	-0.60887	0.0371413	0.192721	-1.46315	-0.472341	5	0.0374333	0.193477	-1.89258	-0.897882	5	0.04747	0.217876	-1.15857	-0.038433	5	0.0451113	0.212394	-1.22844	-0.136485	5	-0.966597	-1.04279	-0.704285
0.523439	3.85043	-0.0544395	0.167171	NaN	NaN	-2.03536	-2.45057	-2.7864	-2.68281		+	-	-			-	-				1.96e-124	309.86	2421900000	1	291.68	0.56937	0.0371413	0.192721	-2.53077	-1.53996	5	0.0374333	0.193477	-2.94792	-1.95322	5	0.04747	0.217876	-3.34646	-2.22633	5	0.0451113	0.212394	-3.22879	-2.13683	5	-1.87182	-2.05025	-2.00465
0.485139	2.63284	0.093746	0.454369	NaN	NaN	-0.508857	-0.905075	0.131978	0.0751735		+	-	-								8.13e-64	263.84	1694700000	1	109.82	-0.43978	0.0371413	0.192721	-1.00426	-0.0134523	5	0.0374333	0.193477	-1.40242	-0.407727	5	0.04747	0.217876	-0.428091	0.692046	5	0.0451113	0.212394	-0.470803	0.62115	5	-0.432102	-0.708714	-0.362909
0.40946	2.96544	0.301444	1.81436	NaN	NaN	-1.38418	-1.69948	-1.66597	-1.90999		+	-	-			-	-				0.00171466	90.709	427260000	1	64.485	0.45929	0.0371413	0.192721	-1.87958	-0.888774	5	0.0374333	0.193477	-2.19683	-1.20213	5	0.04747	0.217876	-2.22604	-1.1059	5	0.0451113	0.212394	-2.45597	-1.36402	5	-1.25699	-1.34028	-1.23033
0.406966	4.99021	0.480455	6.24594	NaN	NaN	-0.508949	-0.831666	-0.231199	-0.65563		+	-	-	+	+		-				2.28e-120	306.35	11285000000	1	230.05	0.20416	0.0371413	0.192721	-1.00435	-0.0135446	5	0.0374333	0.193477	-1.32901	-0.334318	5	0.04747	0.217876	-0.791268	0.328869	5	0.0451113	0.212394	-1.20161	-0.109654	5	-0.440168	-0.454526	-0.358563
-0.382814	4.42355	-0.58489	6.08519	NaN	NaN	-0.609371	-0.188385	-0.850077	-0.251397		+	-			+	-					0	477.79	38912000000	1	477.79	0.42489	0.0371413	0.192721	-1.10477	-0.113966	5	0.0374333	0.193477	-0.685733	0.308963	5	0.04747	0.217876	-1.41015	-0.290009	5	0.0451113	0.212394	-0.797374	0.294579	5	-0.474942	-0.571714	-0.595703
-0.390823	3.49448	-0.0366623	0.126662	NaN	NaN	-1.58234	-1.14298	-2.51115	-2.42633		+	-	-			-	-				8.43e-29	176.78	1119300000	1	160.78	0.55499	0.0371413	0.192721	-2.07775	-1.08694	5	0.0374333	0.193477	-1.64033	-0.645632	5	0.04747	0.217876	-3.07122	-1.95108	5	0.0451113	0.212394	-2.9723	-1.88035	5	-1.46558	-1.68822	-1.68204
-0.405754	3.45734	-0.512831	4.23264	NaN	NaN	-1.46511	-1.01302	-1.40067	-0.867413		+	-	-		+	-	-				1.44e-09	147.83	2695500000	1	128.88	-0.34686	0.0371413	0.192721	-1.96052	-0.969711	5	0.0374333	0.193477	-1.51037	-0.51567	5	0.04747	0.217876	-1.96074	-0.840604	5	0.0451113	0.212394	-1.41339	-0.321436	5	-1.4167	-1.49651	-1.35594
-0.445291	4.00336	-0.216026	1.67896	NaN	NaN	-1.41496	-0.926251	-3.95338	-3.68776		+	-	-			-	-				1.06e-52	270.06	17248000000	1	133.94	-2.4383	0.0371413	0.192721	-1.91037	-0.919558	5	0.0374333	0.193477	-1.4236	-0.428903	5	0.04747	0.217876	-4.51344	-3.39331	5	0.0451113	0.212394	-4.23374	-3.14178	5	-1.36375	-1.405	-1.38333
-0.450908	3.78205	-0.359795	1.9858	NaN	NaN	-0.775652	-0.288788	-1.76304	-1.37387		+	-				-	-				5.39e-19	178.85	1143900000	1	178.85	-1.4097	0.0371413	0.192721	-1.27106	-0.280248	5	0.0374333	0.193477	-0.786136	0.20856	5	0.04747	0.217876	-2.32311	-1.20297	5	0.0451113	0.212394	-1.91985	-0.827892	5	-0.665689	-0.620777	-0.733009
-0.464886	3.04167	-0.623337	4.8691	NaN	NaN	-0.951675	-0.449705	-1.17767	-0.540115		+	-			+	-					0.00146054	108.3	22540000000	1	87.895	-0.12584	0.0371413	0.192721	-1.44708	-0.45627	5	0.0374333	0.193477	-0.947053	0.0476431	5	0.04747	0.217876	-1.73773	-0.617598	5	0.0451113	0.212394	-1.08609	0.00586137	5	-0.905714	-0.909435	-0.816766
-0.47425	3.83099	-0.43186	2.31318	NaN	NaN	-0.887574	-0.377515	-1.52972	-1.0731		+	-				-	-				2.49e-30	211.22	22038000000	1	76.357	-0.10622	0.0371413	0.192721	-1.38298	-0.392169	5	0.0374333	0.193477	-0.874863	0.119833	5	0.04747	0.217876	-2.08979	-0.969649	5	0.0451113	0.212394	-1.61907	-0.527119	5	-0.75412	-0.774219	-0.866913
-0.476356	3.38539	-0.506901	3.29078	NaN	NaN	-1.39657	-0.878854	-3.8416	-3.29843		+	-	-		+	-	-				1.49e-58	251.24	5216600000	1	220.31	0.76627	0.0371413	0.192721	-1.89197	-0.901164	5	0.0374333	0.193477	-1.3762	-0.381506	5	0.04747	0.217876	-4.40167	-3.28153	5	0.0451113	0.212394	-3.84441	-2.75245	5	-1.36363	-1.19251	-1.48646
-0.504969	2.33884	-0.588842	3.46255	NaN	NaN	-2.95843	-2.39639	-3.74078	-3.11986		+	-	-		+	-	-				5.97e-26	205.97	16687000000	1	103.86	-0.60581	0.0371413	0.192721	-3.45383	-2.46302	5	0.0374333	0.193477	-2.89374	-1.89905	5	0.04747	0.217876	-4.30085	-3.18071	5	0.0451113	0.212394	-3.66584	-2.57389	5	-3.00946	-2.95257	-2.96711
-0.51767	2.63324	-0.731596	5.27487	NaN	NaN	-1.37642	-0.820088	-1.83471	-1.0894		+	-	-		+	-	-				1.3e-76	255.39	2670100000	1	197.33	0.065953	0.0371413	0.192721	-1.87183	-0.88102	5	0.0374333	0.193477	-1.31744	-0.32274	5	0.04747	0.217876	-2.39478	-1.27464	5	0.0451113	0.212394	-1.63538	-0.543423	5	-1.23555	-1.25191	-1.20242
-0.542769	2.4773	-0.81022	3.95123	NaN	NaN	-0.598461	-0.0272017	-1.16067	-0.34445		+	-			+	-					1.96e-81	284.86	17024000000	1	283.68	-0.13611	0.0371413	0.192721	-1.09387	-0.103057	5	0.0374333	0.193477	-0.52455	0.470146	5	0.04747	0.217876	-1.72074	-0.600606	5	0.0451113	0.212394	-0.890427	0.201526	5	-0.247158	-0.669978	-0.841629
-0.548436	4.36674	-0.0591031	0.0950726	NaN	NaN	-1.88984	-1.29886	-3.98157	-3.8659		+	-	-			-	-				1.44e-237	411.01	12725000000	1	294.79	0.1957	0.0371413	0.192721	-2.38525	-1.39444	5	0.0374333	0.193477	-1.7962	-0.801507	5	0.04747	0.217876	-4.54164	-3.4215	5	0.0451113	0.212394	-4.41187	-3.31992	5	-1.84248	-1.8907	-1.96524
-0.568626	2.91027	-0.119618	0.537888	NaN	NaN	-3.04287	-2.42004	-4.08923	-3.91498		+	-	-			-	-				3.19e-229	402.24	17015000000	1	186.9	-0.41276	0.0371413	0.192721	-3.53828	-2.54747	5	0.0374333	0.193477	-2.91739	-1.9227	5	0.04747	0.217876	-4.6493	-3.52916	5	0.0451113	0.212394	-4.46095	-3.369	5	-3.10358	-3.12321	-3.187
-0.568972	4.59156	-0.587648	4.37601	NaN	NaN	-0.617298	-0.0211909	-2.3964	-1.78521		+	-			+	-	-				7.03e-68	266.75	1820800000	1	140.46	-0.1887	0.0371413	0.192721	-1.1127	-0.121893	5	0.0374333	0.193477	-0.518539	0.476157	5	0.04747	0.217876	-2.95646	-1.83633	5	0.0451113	0.212394	-2.33118	-1.23923	5	-0.487279	-0.379665	-0.632019
-0.570849	2.56051	-0.150229	0.460049	NaN	NaN	-0.759843	-0.160383	-1.38726	-1.20097		+	-				-	-				6.53e-53	202.13	2803300000	1	141.54	1.3683	0.0371413	0.192721	-1.25525	-0.264439	5	0.0374333	0.193477	-0.65773	0.336965	5	0.04747	0.217876	-1.94733	-0.82719	5	0.0451113	0.212394	-1.74694	-0.65499	5	-0.947389	-0.29407	-0.763091
-0.578076	2.15206	-0.112585	0.277252	NaN	NaN	-1.56727	-0.969887	-2.68928	-2.5614		+	-	-			-	-				3.94e-69	247.13	880020000	1	219.25	0.52623	0.0458584	0.214146	-2.16183	-0.972702	4	0.0374333	0.193477	-1.46723	-0.472539	5	0.058782	0.24245	-3.36243	-2.01613	4	0.0451113	0.212394	-3.10737	-2.01542	5	-1.4644	NaN	-1.62894
-0.583496	2.486	-0.365309	1.29501	NaN	NaN	-1.59274	-0.972097	-3.17042	-2.76699		+	-	-			-	-				1.36e-07	148.91	2131400000	1	110.08	-0.114	0.0371413	0.192721	-2.08814	-1.09733	5	0.0374333	0.193477	-1.46944	-0.474749	5	0.04747	0.217876	-3.73049	-2.61035	5	0.0451113	0.212394	-3.31297	-2.22102	5	-1.68493	-1.33588	-1.89302
-0.585235	2.11937	0.38519	0.380926	NaN	NaN	-1.40393	-0.783765	-0.987288	-1.31576		+	-	-			-	-				2.43e-26	170.45	263470000	1	170.45	-0.41966	0.0371413	0.192721	-1.89934	-0.908531	5	0.0374333	0.193477	-1.28111	-0.286417	5	0.04747	0.217876	-1.54736	-0.427219	5	0.0451113	0.212394	-1.86173	-0.76978	5	-1.48752	-1.42003	-1.15504
-0.585977	2.1472	-1.22429	2.69614	NaN	NaN	-0.718682	-0.105456	-3.2498	-2.02412		+	-			+	-	-				4.16e-92	290.69	2316600000	1	254.45	0.064689	0.0371413	0.192721	-1.21409	-0.223277	5	0.0374333	0.193477	-0.602804	0.391892	5	0.04747	0.217876	-3.80987	-2.68973	5	0.0451113	0.212394	-2.5701	-1.47815	5	-0.719196	-0.504287	-0.697646
-0.588056	2.60149	-0.701077	4.09834	NaN	NaN	-0.709188	-0.094113	-1.06099	-0.349815		+	-			+	-					1.52e-06	161.27	38891000000	1	150.27	-0.36278	0.0371413	0.192721	-1.20459	-0.213783	5	0.0374333	0.193477	-0.591461	0.403235	5	0.04747	0.217876	-1.62106	-0.500923	5	0.0451113	0.212394	-0.895792	0.196161	5	-0.596901	-0.781618	-0.523242
-0.632313	3.36294	-0.668712	2.74058	NaN	NaN	-4.58272	-3.88284	-3.49794	-2.80217		+	-	-		+	-	-				1.74e-06	164.85	52637000000	1	100.92	-0.26998	0.0371413	0.192721	-5.07813	-4.08732	5	0.0374333	0.193477	-4.38019	-3.38549	5	0.04747	0.217876	-4.05801	-2.93787	5	0.0451113	0.212394	-3.34814	-2.25619	5	-4.70072	-4.5793	-4.6332
-0.658881	2.73441	-0.0670628	0.179395	NaN	NaN	-3.11919	-2.41065	-3.36921	-3.24983		+	-	-			-	-				6.64e-05	145.16	6745300000	1	54.27	-0.82202	0.0371413	0.192721	-3.6146	-2.62379	5	0.0374333	0.193477	-2.908	-1.91331	5	0.04747	0.217876	-3.92928	-2.80914	5	0.0451113	0.212394	-3.7958	-2.70385	5	-3.2975	-3.22669	-3.17673
-0.663059	2.60024	-0.509417	0.441677	NaN	NaN	-0.910304	-0.222466	-2.17723	-1.65842		+	-				-	-				2.85e-50	214.91	1663100000	1	152.98	2.7852	0.0371413	0.192721	-1.40571	-0.4149	5	0.0374333	0.193477	-0.719814	0.274882	5	0.058782	0.24245	-2.85038	-1.50408	4	0.0451113	0.212394	-2.20439	-1.11244	5	-0.896525	-0.781093	-1.22509
-0.675074	2.15463	-0.382301	1.43532	NaN	NaN	-1.54971	-0.843447	-3.05746	-2.6385		+	-	-			-	-				9.68e-157	346.13	10382000000	1	93.583	0.24485	0.0371413	0.192721	-2.04512	-1.05431	5	0.0374333	0.193477	-1.34079	-0.346099	5	0.04747	0.217876	-3.61753	-2.4974	5	0.0451113	0.212394	-3.18448	-2.09252	5	-1.65996	-1.63736	-1.17641
-0.693392	3.57863	-0.0263196	0.107491	NaN	NaN	-2.3196	-1.58753	-3.07663	-2.9981		+	-	-			-	-				8.88e-31	232.93	12281000000	1	173.64	0.5254	0.0371413	0.192721	-2.81501	-1.8242	5	0.0374333	0.193477	-2.08488	-1.09018	5	0.04747	0.217876	-3.6367	-2.51656	5	0.0451113	0.212394	-3.54407	-2.45212	5	-2.42116	-2.26231	-2.22775
-0.707481	1.92161	-0.118008	0.583776	NaN	NaN	-1.55207	-0.815304	-3.90439	-3.73286		+	-	-			-	-				9.28e-11	179.2	5009300000	1	175.34	-0.27808	0.0371413	0.192721	-2.04747	-1.05666	5	0.0374333	0.193477	-1.31265	-0.317956	5	0.04747	0.217876	-4.46446	-3.34432	5	0.0451113	0.212394	-4.27883	-3.18688	5	-1.4962	-1.73222	-1.49301
-0.71044	2.05583	-1.08215	3.46127	NaN	NaN	-1.52597	-0.786717	-2.66864	-1.58264		+	-	-		+	-	-				1.43e-290	440.33	9806100000	1	328.64	0.62442	0.0371413	0.192721	-2.02137	-1.03056	5	0.0374333	0.193477	-1.28406	-0.289369	5	0.04747	0.217876	-3.2287	-2.10857	5	0.0451113	0.212394	-2.12862	-1.03667	5	-1.38482	-1.3856	-1.49881
-0.71293	4.22	-0.517203	4.66396	NaN	NaN	-0.694394	0.0379269	-1.86599	-1.32558		+	-			+	-	-				3.25e-10	164.9	3065200000	1	52.716	-3.4355	0.0371413	0.192721	-1.1898	-0.19899	5	0.0374333	0.193477	-0.459421	0.535275	5	0.04747	0.217876	-2.42606	-1.30592	5	0.0451113	0.212394	-1.87155	-0.779599	5	-0.443569	-0.511718	-0.783223
-0.728372	2.3665	-0.278821	0.977266	NaN	NaN	-0.759644	-0.077152	-0.870441	-0.638762		+	-				-					3.97e-109	293.8	262400000	1	293.8	0.97833	0.0458584	0.214146	-1.35421	-0.165081	4	0.0460981	0.214705	-0.673268	0.518964	4	0.058782	0.24245	-1.54359	-0.197292	4	0.0730556	0.270288	-1.49894	0.221415	3	-0.650813	-1.15221	NaN
-0.751766	2.49102	-0.16094	0.289631	NaN	NaN	-2.16773	-1.38246	-2.98994	-2.78317		+	-	-			-	-				1e-55	252.56	987430000	1	252.56	0.35909	0.0371413	0.192721	-2.66313	-1.67232	5	0.0374333	0.193477	-1.87981	-0.885116	5	0.04747	0.217876	-3.55001	-2.42987	5	0.0451113	0.212394	-3.32915	-2.2372	5	-2.50969	-2.40827	-1.96603
-0.77046	2.01668	-0.50845	1.54949	NaN	NaN	-1.04488	-0.254557	-1.90903	-1.37672		+	-				-	-				0.00191568	128.36	758440000	1	116.73	0.15277	0.0371413	0.192721	-1.54028	-0.549474	5	0.0374333	0.193477	-0.751905	0.242791	5	0.04747	0.217876	-2.4691	-1.34896	5	0.0451113	0.212394	-1.92269	-0.83074	5	-1.15687	-0.714632	-1.05008
-0.779995	3.83716	-0.790501	4.13369	NaN	NaN	-0.611078	0.183372	-1.95444	-1.15201		+	-			+	-	-				8.32e-07	128.74	10488000000	1	104.43	-0.18716	0.0371413	0.192721	-1.10648	-0.115673	5	0.0374333	0.193477	-0.313976	0.68072	5	0.04747	0.217876	-2.5145	-1.39437	5	0.0451113	0.212394	-1.69799	-0.606033	5	-0.530705	-0.316548	-0.662048
-0.781668	2.28124	-0.00718752	0.00713097	NaN	NaN	-0.608785	0.182348	-0.355093	-0.170699		+	-									3.65e-13	169.65	151060000	1	169.65	-0.30853	0.0371413	0.192721	-1.10419	-0.11338	5	0.0599864	0.244921	-0.5971	0.961796	3	0.04747	0.217876	-0.915162	0.204975	5	0.0730559	0.270288	-1.03088	0.68948	3	0.172434	-0.418763	-0.927003
-0.782424	3.97647	-0.89186	4.62995	NaN	NaN	-0.759459	0.0389288	-1.70282	-0.805036		+	-			+	-	-				1.22e-27	206.43	907170000	1	86.592	0.48655	0.0371413	0.192721	-1.25486	-0.264055	5	0.0374333	0.193477	-0.458419	0.536277	5	0.04747	0.217876	-2.26289	-1.14275	5	0.0451113	0.212394	-1.35101	-0.25906	5	-0.980244	-0.438567	-0.840409
-0.790114	2.65858	-0.313457	2.00921	NaN	NaN	-0.864752	-0.05796	-0.644557	-0.306854		+	-				-					1.96e-113	311.5	1055500000	1	298.42	-0.1193	0.0371413	0.192721	-1.36016	-0.369348	5	0.0374333	0.193477	-0.555308	0.439388	5	0.04747	0.217876	-1.20463	-0.0844885	5	0.0451113	0.212394	-0.852831	0.239122	5	-0.402564	-0.928241	-0.711227
-0.812409	3.00209	-0.729979	1.42684	NaN	NaN	-1.69045	-0.853484	-2.93699	-2.18619		+	-	-			-	-				5.35e-11	137.6	9871300000	1	108.58	-0.42105	0.0371413	0.192721	-2.18585	-1.19504	5	0.0374333	0.193477	-1.35083	-0.356136	5	0.04747	0.217876	-3.49706	-2.37692	5	0.0451113	0.212394	-2.73216	-1.64021	5	-1.90348	-1.51205	-1.72562
-0.812434	2.17615	-0.571969	1.36676	NaN	NaN	-1.39952	-0.645473	-2.09235	-1.45799		+	-	-			-	-				2.26e-15	190.68	96059000	1	190.68	0.15417	0.0371413	0.192721	-1.89493	-0.904118	5	0.0460982	0.214705	-1.24159	-0.0493568	4	0.04747	0.217876	-2.65242	-1.53229	5	0.0557778	0.236173	-2.11371	-0.802266	4	-1.13386	-1.11494	-1.34577
-0.820901	2.16877	0.45386	1.50882	NaN	NaN	-1.66491	-0.820251	-1.34559	-1.73746		+	-	-			-	-				1e-105	283.98	1404700000	1	266.81	-2.1417	0.0371413	0.192721	-2.16032	-1.16951	5	0.0374333	0.193477	-1.3176	-0.322904	5	0.04747	0.217876	-1.90566	-0.785519	5	0.0451113	0.212394	-2.28344	-1.19149	5	-1.44253	-1.64108	-1.81379
-0.867958	3.36751	-0.617626	0.515213	NaN	NaN	-2.67791	-1.7777	-2.00599	-1.36861		+	-	-			-	-				2.4e-17	161.68	803790000	1	86.18	-0.15779	0.0371413	0.192721	-3.17331	-2.1825	5	0.0374333	0.193477	-2.27505	-1.28036	5	0.04747	0.217876	-2.56606	-1.44592	5	0.0451113	0.212394	-1.91459	-0.822638	5	-2.5809	-2.82691	-2.6048
-0.876752	5.95201	-0.52368	2.62154	NaN	NaN	-1.3621	-0.465704	-1.31296	-0.830567		+	-			+	-	-				7.76e-06	139.98	214270000	1	139.98	-0.75639	0.0371413	0.192721	-1.8575	-0.866696	5	0.0460981	0.214705	-1.06182	0.130411	4	0.04747	0.217876	-1.87303	-0.752895	5	0.0557776	0.236173	-1.48629	-0.174845	4	-1.42041	-1.31662	-1.39873
-0.934755	2.18459	-1.03489	2.32079	NaN	NaN	-0.521588	0.417375	-1.07163	-0.0410458		+	-			+	-					3.98e-14	156.57	1620200000	1	113.4	0.19088	0.0371413	0.192721	-1.01699	-0.0261835	5	0.0374333	0.193477	-0.0799728	0.914723	5	0.04747	0.217876	-1.6317	-0.511559	5	0.0451113	0.212394	-0.587022	0.504931	5	0.0547429	-0.568949	-0.524945
-0.952696	2.39191	-1.13466	3.85658	NaN	NaN	-0.569717	0.386651	-2.28326	-1.14949		+	-			+	-	-				2.83e-49	257.75	14995000000	1	164.13	-0.43977	0.0371413	0.192721	-1.06512	-0.0743128	5	0.0374333	0.193477	-0.110697	0.883999	5	0.04747	0.217876	-2.84333	-1.72319	5	0.0451113	0.212394	-1.69547	-0.603515	5	-0.893866	-0.192978	-0.674218
-0.978865	6.20314	-0.803533	5.87879	NaN	NaN	-1.20772	-0.219629	-1.21803	-0.407837		+	-			+	-					5.42e-112	304.36	13825000000	1	276.19	-0.085806	0.0371413	0.192721	-1.70312	-0.712312	5	0.0374333	0.193477	-0.716977	0.277719	5	0.04747	0.217876	-1.7781	-0.657962	5	0.0451113	0.212394	-0.953814	0.138139	5	-1.04552	-1.30593	-1.10065
-0.983081	3.08037	-0.870839	6.02191	NaN	NaN	-1.80897	-0.810215	-1.59039	-0.713432		+	-	-		+	-	-				3.07e-14	177.36	1700100000	1	177.36	-0.47744	0.0371413	0.192721	-2.30438	-1.31357	5	0.0374333	0.193477	-1.30756	-0.312867	5	0.04747	0.217876	-2.15046	-1.03032	5	0.0451113	0.212394	-1.25941	-0.167455	5	-1.73742	-1.90962	-1.82213
-0.997182	1.76492	-0.517068	1.09616	NaN	NaN	-1.22698	-0.249981	-0.687105	-0.155324		+	-									4.95e-05	130.1	446420000	1	130.1	0.086517	0.0599259	0.244798	-2.00604	-0.44793	3	0.0374333	0.193477	-0.747329	0.247367	5	0.0771789	0.277811	-1.57122	0.197013	3	0.0451113	0.212394	-0.7013	0.390653	5	-1.13099	-0.651896	-1.93199
-1.02182	2.5384	-0.0855317	0.0579772	NaN	NaN	-1.11795	-0.0904763	-0.18078	-0.0640825		+	-									4.01e-41	228.08	5550100000	1	179.57	-0.022958	0.0371413	0.192721	-1.61336	-0.622547	5	0.0374333	0.193477	-0.587824	0.406872	5	0.04747	0.217876	-0.740849	0.379288	5	0.0451113	0.212394	-0.610059	0.481894	5	-0.901406	-1.29637	-1.04058
-1.0358	3.00398	-0.963798	3.88057	NaN	NaN	-0.882212	0.155781	-1.21166	-0.248187		+	-			+	-					1.15e-220	365.15	4073200000	1	182.98	-0.24861	0.0371413	0.192721	-1.37762	-0.386808	5	0.0374333	0.193477	-0.341567	0.653129	5	0.04747	0.217876	-1.77173	-0.651589	5	0.0451113	0.212394	-0.794164	0.297789	5	-1.00223	-0.397055	-1.29984
-1.04311	2.46862	-0.210292	0.164212	NaN	NaN	-1.75588	-0.721441	-2.2093	-2.13377		+	-	-			-	-				1.14e-47	232.33	243270000	1	208.18	-0.57731	0.0458584	0.214146	-2.35044	-1.16131	4	0.0374333	0.193477	-1.21879	-0.224093	5	0.058782	0.24245	-2.88245	-1.53615	4	0.0557776	0.236173	-2.78949	-1.47805	4	-1.66332	NaN	-1.80306
-1.07593	2.59859	-2.05518	1.8274	NaN	NaN	-2.56193	-1.55663	-3.85789	-1.9496		+	-	-		+	-	-				3.31e-35	211.49	345720000	1	211.49	0.15097	0.0599259	0.244798	-3.34099	-1.78288	3	0.0374333	0.193477	-2.05397	-1.05928	5	0.077179	0.277811	-4.74201	-2.97377	3	0.0451113	0.212394	-2.49558	-1.40362	5	NaN	NaN	-2.67225
-1.10947	2.50709	-1.01689	1.11096	NaN	NaN	-3.06847	-1.97016	-4.22453	-3.30446		+	-	-			-	-				0.00158758	79.466	468650000	1	51.771	-0.43445	0.0371413	0.192721	-3.56388	-2.57307	5	0.0460981	0.214705	-2.56628	-1.37405	4	0.04747	0.217876	-4.7846	-3.66446	5	0.0557776	0.236173	-3.96018	-2.64873	4	-2.9439	-3.27547	-3.09414
-1.14204	4.53532	-2.15524	6.89226	NaN	NaN	-2.33675	-1.18264	-4.39399	-2.27042		+	-	-		+	-	-				2.78e-214	401.88	22972000000	1	217.68	0.19556	0.0371413	0.192721	-2.83215	-1.84134	5	0.0374333	0.193477	-1.67999	-0.685296	5	0.04747	0.217876	-4.95405	-3.83392	5	0.0451113	0.212394	-2.81639	-1.72444	5	-2.30128	-2.42638	-2.68242
-1.15088	1.70694	0.0562429	0.0481755	NaN	NaN	-0.801352	0.343938	-0.606914	-0.623125		+	-				-	-				1.42e-19	189.33	1169300000	1	184.87	0.15788	0.0371413	0.192721	-1.29676	-0.305947	5	0.0374333	0.193477	-0.15341	0.841286	5	0.04747	0.217876	-1.16698	-0.0468456	5	0.0451113	0.212394	-1.1691	-0.0771481	5	-1.07957	-0.0572068	-0.406407
-1.17732	2.18637	-0.948143	1.66592	NaN	NaN	-1.05006	0.0317496	-1.08055	-0.149006		+	-			+	-					0.00210276	85.355	193180000	1	60.641	0.32042	0.0371413	0.192721	-1.54547	-0.554657	5	0.0599863	0.244921	-0.747699	0.811198	3	0.04747	0.217876	-1.64062	-0.520478	5	0.0730558	0.270288	-1.00918	0.711172	3	-0.628361	-0.72224	-0.495126
-1.18012	3.39461	-0.25939	0.855772	NaN	NaN	-0.514004	0.655578	-1.51318	-1.22166		+	-	+			-	-				2.73e-06	152.06	384340000	1	93.162	-0.77925	0.0371413	0.192721	-1.00941	-0.0185993	5	0.0374333	0.193477	0.15823	1.15293	5	0.04747	0.217876	-2.07325	-0.953114	5	0.0451113	0.212394	-1.76764	-0.675682	5	-0.0984032	-1.10342	-0.202029
-1.19531	1.76644	-1.23054	1.66434	NaN	NaN	-1.04653	0.111052	-1.66582	-0.600092		+	-			+	-					6.63e-19	142.37	152340000	1	57.177	-0.36396	0.0458584	0.214146	-1.64109	-0.451962	4	0.0599863	0.244921	-0.668396	0.8905	3	0.0587819	0.24245	-2.33896	-0.992666	4	0.0730557	0.270288	-1.46027	0.260086	3	-1.38774	-1.46348	-0.543429
-1.22734	1.87242	-2.54711	2.92497	NaN	NaN	-1.57259	-0.346809	-3.90233	-1.40701		+	-			+	-	-				7.49e-36	215.09	4524700000	1	103.05	0.05401	0.0371413	0.192721	-2.068	-1.07719	5	0.0374333	0.193477	-0.844157	0.150539	5	0.04747	0.217876	-4.4624	-3.34226	5	0.0451113	0.212394	-1.95299	-0.861034	5	-0.300405	-1.22091	-2.26066
-1.23003	5.29427	-0.990943	3.74433	NaN	NaN	-2.64969	-1.40937	-3.53972	-2.53542		+	-	-		+	-	-				5.9e-289	447.86	15215000000	1	255.56	0.31366	0.0371413	0.192721	-3.14509	-2.15428	5	0.0374333	0.193477	-1.90672	-0.912021	5	0.04747	0.217876	-4.09978	-2.97965	5	0.0451113	0.212394	-3.08139	-1.98944	5	-2.66611	-2.74003	-2.79867
-1.24273	1.97916	-1.10144	2.81857	NaN	NaN	-2.32202	-1.0734	-4.57238	-3.45579		+	-	-		+	-	-				1.13e-12	167.05	13639000000	1	54.683	0.15822	0.0371413	0.192721	-2.81742	-1.82661	5	0.0374333	0.193477	-1.57075	-0.576056	5	0.04747	0.217876	-5.13245	-4.01232	5	0.0451113	0.212394	-4.00177	-2.90982	5	-2.20964	-2.60254	-2.60615
-1.26694	3.49731	-1.30177	4.54654	NaN	NaN	-2.28481	-1.01385	-2.94404	-1.64619		+	-	-		+	-	-				0	525.29	11973000000	1	182.98	-0.24861	0.0371413	0.192721	-2.78022	-1.78941	5	0.0374333	0.193477	-1.5112	-0.516506	5	0.04747	0.217876	-3.50411	-2.38397	5	0.0451113	0.212394	-2.19216	-1.10021	5	-2.66896	-1.89519	-2.72273
-1.27287	5.39469	-0.937281	1.82514	NaN	NaN	-1.85238	-0.580673	-3.61763	-2.66417		+	-	-		+	-	-				0.000149117	116.05	388440000	1	80.787	-1.3933	0.0371413	0.192721	-2.34779	-1.35698	5	0.0374333	0.193477	-1.07802	-0.0833248	5	0.04747	0.217876	-4.1777	-3.05756	5	0.0451113	0.212394	-3.21015	-2.11819	5	-1.7057	-1.61559	-1.98781
-1.27505	1.72854	-1.32406	0.959907	NaN	NaN	-2.00766	-0.924004	-0.971984	0.290144		+	-	-			-					0.00182105	59.908	245720000	1	49.35	-1.1709	0.0458584	0.214146	-2.60222	-1.41309	4	0.0599862	0.244921	-1.70345	-0.144557	3	0.058782	0.24245	-1.64513	-0.298835	4	0.0730557	0.270288	-0.570034	1.15032	3	-2.36984	NaN	-2.65616
-1.32079	2.1957	-0.8162	1.27978	NaN	NaN	-1.57057	-0.256941	-2.34237	-1.51288		+	-				-	-				0.000167245	116.75	3233500000	1	57.348	0.37691	0.0371413	0.192721	-2.06597	-1.07516	5	0.0374333	0.193477	-0.754289	0.240407	5	0.04747	0.217876	-2.90244	-1.7823	5	0.0451113	0.212394	-2.05886	-0.966906	5	-1.49693	-1.56801	-2.07652
-1.32452	3.796	-0.831879	3.06874	NaN	NaN	-0.808996	0.49964	-1.59088	-0.751185		+	-	+		+	-	-				1.68e-37	211.89	2417100000	1	179.39	-1.8302	0.0371413	0.192721	-1.3044	-0.313592	5	0.0374333	0.193477	0.00229207	0.996988	5	0.04747	0.217876	-2.15094	-1.03081	5	0.0451113	0.212394	-1.29716	-0.205209	5	-0.848784	-0.690268	-0.895729
-1.35614	1.74114	-0.486812	2.57289	NaN	NaN	-1.81873	-0.469102	-1.66965	-1.15956		+	-			+	-	-				3.3e-190	349.31	1919300000	1	265.68	-0.072134	0.0371413	0.192721	-2.31413	-1.32332	5	0.0374333	0.193477	-0.96645	0.0282457	5	0.04747	0.217876	-2.22971	-1.10958	5	0.0451113	0.212394	-1.70554	-0.613584	5	-1.24173	-1.18488	-1.46526
-1.37309	1.80857	-1.14371	1.58029	NaN	NaN	-2.2833	-0.912546	-2.6456	-1.50086		+	-	-		+	-	-				0	493.91	5670000000	1	182.98	-0.24861	0.0371413	0.192721	-2.7787	-1.78789	5	0.0374333	0.193477	-1.40989	-0.415198	5	0.04747	0.217876	-3.20566	-2.08553	5	0.0451113	0.212394	-2.04684	-0.954884	5	-2.91321	-1.95515	-3.42693
-1.39873	1.62221	-1.7135	1.9853	NaN	NaN	-1.80581	-0.614001	-1.90837	-0.22606		+	-	-		+	-					3.6e-07	149.49	323960000	1	74.392	0.79913	0.0458584	0.214146	-2.40037	-1.21124	4	0.0460981	0.214705	-1.21012	-0.0178852	4	0.0587819	0.24245	-2.58152	-1.23522	4	0.0557777	0.236173	-0.881781	0.429662	4	-1.94364	-1.25868	-1.1285
-1.46903	5.94254	-0.868467	0.602573	NaN	NaN	-2.07279	-0.614177	-2.15064	-1.27237		+	-	-			-	-				2.45e-113	303.13	3957500000	1	288.53	0.014506	0.0371413	0.192721	-2.56819	-1.57738	5	0.0374333	0.193477	-1.11152	-0.116829	5	0.04747	0.217876	-2.71071	-1.59057	5	0.0451113	0.212394	-1.81835	-0.726395	5	-2.22485	-2.20594	-2.0835
-1.48057	1.8342	-1.56699	3.06168	NaN	NaN	-1.6161	NaN	-1.39047	NaN		+	-			+	-					5.26e-34	157.76	46937000	1	135.78	1.5053	0.0599259	0.244798	-2.39515	-0.837041	3	NaN	NaN	NaN	NaN	NaN	0.0771789	0.277811	-2.27459	-0.506351	3	NaN	NaN	NaN	NaN	NaN	NaN	-1.79612	NaN
-1.50127	2.67785	-1.7615	2.6964	NaN	NaN	-0.955705	NaN	-1.24982	NaN		+	-			+	-					6.1e-16	170.79	99808000	1	170.79	3.1758	0.0458584	0.214146	-1.55027	-0.361141	4	NaN	NaN	NaN	NaN	NaN	0.058782	0.24245	-1.92297	-0.576673	4	NaN	NaN	NaN	NaN	NaN	-0.387407	NaN	-1.15531
-1.53384	4.02182	-1.97378	3.52871	NaN	NaN	-1.48128	NaN	-1.75131	NaN		+	-			+	-					8.46e-11	152.16	18110000	1	152.16	0.4214	0.0458584	0.214146	-2.07585	-0.88672	4	NaN	NaN	NaN	NaN	NaN	0.058782	0.24245	-2.42445	-1.07816	4	NaN	NaN	NaN	NaN	NaN	-1.3565	-1.54132	-1.31589
-1.53461	4.33424	0.0480823	0.0436232	NaN	NaN	-2.82642	-1.29775	-3.50164	-3.49156		+	-	-			-	-				7.04e-288	436.14	4475200000	1	269.62	0.19171	0.0371413	0.192721	-3.32182	-2.33101	5	0.0374333	0.193477	-1.79509	-0.800398	5	0.04747	0.217876	-4.0617	-2.94157	5	0.0451113	0.212394	-4.03754	-2.94559	5	-2.92051	-2.79342	-3.02248
-1.56158	4.96292	-1.30599	4.05145	NaN	NaN	-1.6259	-0.0852534	-1.64659	-0.352983		+	-			+	-					7.59e-75	266.2	2305300000	1	266.2	0.21692	0.0371413	0.192721	-2.1213	-1.13049	5	0.0374333	0.193477	-0.582601	0.412095	5	0.04747	0.217876	-2.20666	-1.08652	5	0.0451113	0.212394	-0.898959	0.192994	5	-1.30645	-1.42186	-1.59146
-1.5716	4.15007	-2.11861	2.64613	NaN	NaN	-1.14697	NaN	-1.38182	NaN		+	-			+	-					8.86e-06	116.6	19420000	1	116.6	-1.4561	0.0599259	0.244798	-1.92603	-0.367916	3	NaN	NaN	NaN	NaN	NaN	0.0771789	0.277811	-2.26594	-0.497703	3	NaN	NaN	NaN	NaN	NaN	-1.09941	NaN	-1.45509
-1.60913	5.67312	-1.08576	4.81321	NaN	NaN	-3.50142	-1.89516	-4.04979	-2.95154		+	-	-		+	-	-				0.000250414	138.78	32732000000	1	93.429	-0.22442	0.0371413	0.192721	-3.99683	-3.00602	5	0.0374333	0.193477	-2.39251	-1.39781	5	0.04747	0.217876	-4.60986	-3.48972	5	0.0451113	0.212394	-3.49751	-2.40556	5	-3.42597	-3.43582	-3.97845
-1.62398	1.55928	-2.13407	1.30614	NaN	NaN	-2.75789	-1.14595	-2.74304	-0.650251		+	-	-			-	-				2.09e-33	182.56	5188300000	1	43.622	-1.1192	0.0371413	0.192721	-3.25329	-2.26248	5	0.0374333	0.193477	-1.64329	-0.648599	5	0.04747	0.217876	-3.30311	-2.18297	5	0.0451113	0.212394	-1.19623	-0.104274	5	-3.00586	-2.70201	-3.46076
-1.66883	4.77331	-0.401378	0.846211	NaN	NaN	-2.64245	-0.989635	-2.84246	-2.40662		+	-	-			-	-				0.000294381	109.44	778730000	1	99.013	0.44438	0.0371413	0.192721	-3.13786	-2.14705	5	0.0374333	0.193477	-1.48698	-0.492287	5	0.04747	0.217876	-3.40253	-2.28239	5	0.0451113	0.212394	-2.95259	-1.86064	5	-2.76646	-2.8185	-2.92437
-1.78203	1.43721	0.579885	0.664394	NaN	NaN	-1.55202	0.211237	0.145834	0.224733		+	-									1.06e-277	413.16	501580000	1	401.56	0.51572	0.0599259	0.244798	-2.33108	-0.772966	3	0.150995	0.388581	-4.72615	5.14863	1	0.0771789	0.277811	-0.738284	1.02995	3	0.192129	0.438325	-5.34472	5.79418	1	NaN	-3.35102	-0.461316
-1.79279	2.04181	-1.74463	2.29536	NaN	NaN	-4.24363	-3.2739	-4.92504	-3.78525		+	-			+	-					0.00303646	69.825	432300000	1	58.981	0.40986	0.0458584	0.214146	-4.83819	-3.64906	4	0.150995	0.388581	-8.21129	1.6635	1	0.058782	0.24245	-5.59819	-4.2519	4	0.192129	0.438325	-9.3547	1.78421	1	-4.61434	-4.68783	NaN
-1.84028	2.34561	-0.875905	0.245408	NaN	NaN	-2.61678	-0.803044	-4.56372	-3.70129		+	-	-			-	-				6.88e-15	151.07	4935100000	1	132.17	0.38819	0.0371413	0.192721	-3.11218	-2.12138	5	0.0374333	0.193477	-1.30039	-0.305696	5	0.058782	0.24245	-5.23687	-3.89057	4	0.0451113	0.212394	-4.24727	-3.15531	5	-2.65213	-3.39123	-1.43189
-1.84055	2.11725	-2.32118	2.41625	NaN	NaN	-2.11515	-0.451563	-2.8488	-0.676776		+	-			+	-					4.34e-22	170.44	93433000	1	57.14	-0.5135	0.0599259	0.244798	-2.8942	-1.33609	3	0.085858	0.293015	-1.71231	0.809181	2	0.077179	0.277811	-3.73291	-1.96468	3	0.105853	0.325351	-2.07665	0.723096	2	NaN	NaN	-1.95091
-1.97469	5.54914	-1.59041	3.61416	NaN	NaN	-1.20839	0.716016	-1.86828	-0.301174		+	-	+		+	-					5.12e-128	322.68	11076000000	1	283.98	-0.36655	0.0371413	0.192721	-1.7038	-0.712987	5	0.0374333	0.193477	0.218668	1.21336	5	0.04747	0.217876	-2.42835	-1.30821	5	0.0451113	0.212394	-0.84715	0.244803	5	-1.0405	-0.832325	-1.15434
-2.00941	2.41865	-2.23981	1.99591	NaN	NaN	-1.20746	0.911678	-1.14807	0.719517		+	-	+		+	-					1.26e-202	342.29	709690000	1	342.29	-0.39781	0.0371413	0.192721	-1.70287	-0.712057	5	0.0599862	0.244921	0.13223	1.69113	3	0.058782	0.24245	-1.82122	-0.474925	4	0.0730557	0.270288	-0.140661	1.57969	3	-0.419414	-0.864253	-0.893767
-2.18918	2.74052	-1.49525	1.4616	NaN	NaN	-0.957359	NaN	-0.554099	NaN		+	-			+						2.39e-19	179.39	11957000	1	179.39	-4.2481	0.0599259	0.244798	-1.73641	-0.178304	3	NaN	NaN	NaN	NaN	NaN	0.0771789	0.277811	-1.43822	0.330019	3	NaN	NaN	NaN	NaN	NaN	NaN	-0.340581	NaN
-2.72922	2.12239	-1.17933	2.02122	NaN	NaN	-1.39617	1.26028	-1.7266	-0.643588		+	-			+	-					7.59e-19	182.03	38082000	1	175.21	0.39998	0.0599259	0.244798	-2.17523	-0.617117	3	0.085858	0.293015	-0.000466528	2.52102	2	0.0771789	0.277811	-2.61072	-0.842484	3	0.105853	0.325351	-2.04346	0.756284	2	NaN	-1.64351	-1.03228
-2.80356	5.53553	-1.71384	3.76227	NaN	NaN	-0.998581	NaN	0.498764	NaN		+	-			+						4.04e-05	127.76	46179000	1	88.496	-0.23126	0.0458584	0.214146	-1.59314	-0.404017	4	NaN	NaN	NaN	NaN	NaN	0.058782	0.24245	-0.174385	1.17191	4	NaN	NaN	NaN	NaN	NaN	-1.13522	-1.06612	-0.767715
-3.0288	2.09695	-3.38229	1.5739	NaN	NaN	-1.16959	1.72554	-1.80834	1.44592		+	-	+		+	-	+				1.84e-13	169.58	296320000	1	132.31	-0.3932	0.0458584	0.214146	-1.76415	-0.575022	4	0.0374333	0.193477	1.22819	2.22289	5	0.058782	0.24245	-2.48149	-1.1352	4	0.0451113	0.212394	0.899944	1.9919	5	NaN	-2.04385	-1.04259
-3.0288	2.09695	-3.38229	1.5739	NaN	NaN	-1.16959	1.72554	-1.80834	1.44592		+	-	+		+	-	+				1.84e-13	169.58	296320000	1	132.31	-0.3932	0.0458584	0.214146	-1.76415	-0.575022	4	0.0374333	0.193477	1.22819	2.22289	5	0.058782	0.24245	-2.48149	-1.1352	4	0.0451113	0.212394	0.899944	1.9919	5	NaN	-2.04385	-1.04259
-3.91282	2.52219	-5.10303	3.91564	NaN	NaN	-1.87046	1.82892	-1.59998	NaN		+	-			+	-					5.09e-38	217.68	429460000	1	217.68	0.19556	0.0458584	0.214146	-2.46502	-1.2759	4	0.150995	0.388581	-3.10847	6.76631	1	0.058782	0.24245	-2.27313	-0.926834	4	NaN	NaN	NaN	NaN	NaN	NaN	-4.16523	-2.43066
-0.446691	4.60522	-0.144597	1.86221	NaN	NaN	0.707839	1.1742	0.930045	1.09616		+	+	+			+	+				3.45e-248	426.66	11212000000	1	426.66	3.2403	0.0371413	0.192721	0.212435	1.20324	5	0.0374333	0.193477	0.676848	1.67154	5	0.04747	0.217876	0.369977	1.49011	5	0.0451113	0.212394	0.550181	1.64213	5	0.950398	0.827451	0.782687
-0.653678	2.73235	0.0276124	0.0519885	NaN	NaN	0.870153	1.53006	1.12496	1.17331		+	+	+			+	+				2.92e-36	211.49	190810000	1	161.99	0.66724	0.0371413	0.192721	0.374749	1.36556	5	0.0460982	0.214705	0.933947	2.12618	4	0.04747	0.217876	0.564893	1.68503	5	0.0557778	0.236173	0.517593	1.82904	4	0.819081	1.05417	1.2509
-0.697261	3.89883	-1.11194	7.28529	NaN	NaN	0.664861	1.36729	-1.32237	-0.216474		+	+	+		+	-					5.8e-32	210.15	37953000000	1	209.67	-0.68758	0.0371413	0.192721	0.169457	1.16027	5	0.0374333	0.193477	0.869945	1.86464	5	0.04747	0.217876	-1.88244	-0.7623	5	0.0451113	0.212394	-0.762451	0.329502	5	0.732462	0.959032	0.664359
-0.712272	2.14503	-0.240723	0.520486	NaN	NaN	2.17038	2.77073	3.00421	3.08615		+	+	+			+	+				5.95e-37	221.03	701030000	1	217.68	0.51966	0.0371413	0.192721	1.67498	2.66579	5	0.0460981	0.214705	2.17462	3.36685	4	0.04747	0.217876	2.44414	3.56427	5	0.0557776	0.236173	2.43043	3.74187	4	2.39511	2.31562	2.51052
-0.752354	4.09265	-0.956097	4.31873	NaN	NaN	0.497985	1.25408	-0.792224	0.161201		+	+	+		+	-					2.68e-121	336.79	1518600000	1	52.612	-0.30429	0.0371413	0.192721	0.00258037	0.993389	5	0.0374333	0.193477	0.75673	1.75143	5	0.04747	0.217876	-1.35229	-0.232156	5	0.0451113	0.212394	-0.384776	0.707177	5	0.719666	0.681748	0.544409
-0.762706	2.47125	-1.31561	2.68967	NaN	NaN	1.01699	1.78732	-1.14162	0.0219947		+	+	+		+	-					9.56e-15	171.11	101340000	1	171.11	0.10816	0.0599259	0.244798	0.237932	1.79604	3	0.0460981	0.214705	1.19121	2.38344	4	0.0771789	0.277811	-2.02574	-0.257499	3	0.0557777	0.236173	-0.633727	0.677716	4	1.48728	0.90012	NaN
-0.766787	1.82574	0.166142	1.07586	NaN	NaN	0.662287	1.43012	-0.137747	-0.262087		+	+	+								3.81e-21	189.23	1004100000	1	162.88	-0.88049	0.0371413	0.192721	0.166883	1.15769	5	0.0374333	0.193477	0.932771	1.92747	5	0.04747	0.217876	-0.697816	0.422321	5	0.0451113	0.212394	-0.808064	0.28389	5	0.733621	0.724537	0.710244
-0.853891	4.70896	-0.865329	4.35891	NaN	NaN	0.535767	1.38691	-0.317916	0.545649		+	+	+		+						9.12e-05	129.72	2704400000	1	66.299	-0.11493	0.0371413	0.192721	0.0403629	1.03117	5	0.0374333	0.193477	0.88956	1.88426	5	0.04747	0.217876	-0.877984	0.242153	5	0.0451113	0.212394	-0.000327466	1.09163	5	0.798932	0.816696	0.60286
-0.890873	2.9223	-0.734768	3.29079	NaN	NaN	1.45404	2.35157	-0.774577	-0.0361734		+	+	+		+	-					3.02e-06	133.81	114190000	1	114.89	-0.63237	0.0458584	0.214146	0.859478	2.04861	4	0.0374333	0.193477	1.85422	2.84892	5	0.058782	0.24245	-1.44773	-0.101428	4	0.0451113	0.212394	-0.58215	0.509803	5	1.57233	1.77126	1.46875
-0.894797	2.19024	-0.623837	1.5207	NaN	NaN	0.514653	0.668312	1.02495	0.792661		+	+				+					4.92e-28	204.07	102980000	1	204.07	-1.369	0.0371413	0.192721	0.0192488	1.01006	5	0.150996	0.388582	-4.26909	5.60571	1	0.04747	0.217876	0.46488	1.58502	5	0.19213	0.438326	-4.7768	6.36212	1	0.505473	0.623196	1.01676
-0.909107	2.66128	-1.3583	2.36448	NaN	NaN	1.23172	2.12702	-0.186528	1.1478		+	+	+		+		+				4.63e-102	277.7	19813000000	1	196.01	-0.03543	0.0371413	0.192721	0.736318	1.72713	5	0.0374333	0.193477	1.62967	2.62437	5	0.04747	0.217876	-0.746596	0.373541	5	0.0451113	0.212394	0.601824	1.69378	5	1.5412	1.60767	1.23982
-1.14192	3.86707	-1.47989	5.63321	NaN	NaN	0.616937	1.73799	-1.34607	0.111974		+	+	+		+	-					9.73e-05	140.84	4254000000	1	45.908	0.36862	0.0371413	0.192721	0.121533	1.11234	5	0.0374333	0.193477	1.24064	2.23534	5	0.04747	0.217876	-1.90614	-0.785999	5	0.0451113	0.212394	-0.434002	0.657951	5	0.873206	0.827339	0.730833
-1.69764	1.80706	0.455871	0.495907	NaN	NaN	0.531809	2.10102	0.446676	-0.0949499		+	+	+								1.27e-40	226.93	680700000	1	226.93	0.032613	0.0371413	0.192721	0.0364048	1.02721	5	0.0599862	0.244921	1.32158	2.88047	3	0.04747	0.217876	-0.113393	1.00674	5	0.0730556	0.270288	-0.955127	0.765227	3	1.23565	0.841761	0.0662111
-1.75597	1.68888	0.400785	0.562238	NaN	NaN	0.911049	2.76519	0.884455	0.6107		+	+	+			+					0.00485689	85.38	3964900000	1	48.174	1.9	0.0458584	0.214146	0.316485	1.50561	4	0.0460982	0.214705	2.16907	3.3613	4	0.058782	0.24245	0.211306	1.5576	4	0.0557778	0.236173	-0.0450223	1.26642	4	-0.360014	1.99422	NaN
-2.17781	3.39113	-1.67479	2.58444	NaN	NaN	1.33012	3.55554	2.238	4.07278		+	+			+	+					3.16e-21	190.37	92891000	1	190.37	-0.70556	0.0458584	0.214146	0.735552	1.92468	4	0.150995	0.388581	-1.38185	8.49294	1	0.04747	0.217876	1.67793	2.79807	5	0.192129	0.438325	-1.49667	9.64223	1	NaN	1.45215	1.57773
-0.384302	3.07692	-0.466446	2.786	NaN	NaN	0.237001	0.649947	-0.364593	0.117679		+		+		+						2e-74	294.44	14699000000	1	294.44	-0.64426	0.0371413	0.192721	-0.258403	0.732405	5	0.0374333	0.193477	0.152599	1.1473	5	0.04747	0.217876	-0.924661	0.195476	5	0.0451113	0.212394	-0.428297	0.663656	5	0.152972	0.464632	0.408036
-0.392746	2.94314	-0.902571	1.60555	NaN	NaN	0.285154	0.705503	-0.945637	-0.0424377		+		+		+	-					3.07e-144	308.33	9263400000	1	199.75	-0.24973	0.0371413	0.192721	-0.21025	0.780558	5	0.0374333	0.193477	0.208155	1.20285	5	0.04747	0.217876	-1.50571	-0.385569	5	0.0451113	0.212394	-0.588414	0.503539	5	0.274616	0.439205	0.516932
-0.395785	4.30356	-0.511104	4.37454	NaN	NaN	-0.00878026	0.417703	-0.154616	0.369038		+				+						0	462.08	19566000000	1	187.86	1.3463	0.0371413	0.192721	-0.504185	0.486624	5	0.0374333	0.193477	-0.0796447	0.915051	5	0.04747	0.217876	-0.714684	0.405453	5	0.0451113	0.212394	-0.176939	0.915014	5	0.0436838	0.187832	0.0162486
-0.499557	4.30669	-0.727515	4.04539	NaN	NaN	0.448997	0.967946	-0.0982774	0.632046		+		+		+		+				1.1e-10	171.09	39204000000	1	59.975	-1.4292	0.0371413	0.192721	-0.0464076	0.944401	5	0.0374333	0.193477	0.470598	1.46529	5	0.04747	0.217876	-0.658346	0.461791	5	0.0451113	0.212394	0.0860693	1.17802	5	0.678277	0.513322	0.395982
-0.567068	5.59793	-0.597561	6.92926	NaN	NaN	0.0816301	0.668153	-0.589914	0.0192266		+		+		+	-					4.65e-07	147.29	9638700000	1	111.82	0.29537	0.0371413	0.192721	-0.413774	0.577034	5	0.0374333	0.193477	0.170805	1.1655	5	0.04747	0.217876	-1.14998	-0.0298459	5	0.0451113	0.212394	-0.52675	0.565203	5	0.265692	0.25507	0.113993
-0.592269	3.50416	-0.257167	1.82987	NaN	NaN	-0.473331	0.143075	-0.296892	-0.0152586		+										7.79e-71	258.55	416510000	1	143.37	0.63593	0.0371413	0.192721	-0.968735	0.0220735	5	0.0374333	0.193477	-0.354273	0.640423	5	0.04747	0.217876	-0.85696	0.263176	5	0.0451113	0.212394	-0.561235	0.530718	5	-0.312046	-0.553811	-0.536337
-0.599752	3.98191	-0.84455	4.60152	NaN	NaN	-0.312573	0.309076	-0.6174	0.228198		+				+	-					1.89e-54	255.39	2538600000	1	253.15	-0.010976	0.0371413	0.192721	-0.807977	0.182831	5	0.0374333	0.193477	-0.188272	0.806424	5	0.04747	0.217876	-1.17747	-0.0573312	5	0.0451113	0.212394	-0.317778	0.774175	5	-0.148297	-0.273922	-0.327218
-0.603038	3.48189	-0.796935	5.99809	NaN	NaN	0.163601	0.78303	-0.713424	0.0872373		+		+		+	-					6.71e-63	255.39	2932000000	1	242.07	-0.45095	0.0371413	0.192721	-0.331803	0.659005	5	0.0374333	0.193477	0.285682	1.28038	5	0.04747	0.217876	-1.27349	-0.153355	5	0.0451113	0.212394	-0.458739	0.633214	5	0.46991	0.261469	0.204203
-0.62419	2.23466	-0.259437	0.878884	NaN	NaN	-0.246029	0.777636	-0.331195	0.0209753		+										2.07e-28	194.77	64284000	1	150.26	-0.14536	0.0371413	0.192721	-0.741433	0.249375	5	0.150995	0.388581	-4.15976	5.71503	1	0.04747	0.217876	-0.891264	0.228873	5	0.192129	0.438326	-5.54848	5.59043	1	0.0204637	-0.277179	-0.244609
-0.643715	2.51423	-0.00934343	0.013459	NaN	NaN	-0.257858	0.396234	-0.150053	0.0349074		+										0.000315675	83.692	66935000	1	79.652	-0.63929	0.0458584	0.214146	-0.852422	0.336706	4	0.0858583	0.293016	-0.864512	1.65698	2	0.058782	0.24245	-0.823201	0.523096	4	0.105854	0.325351	-1.36497	1.43478	2	-0.206596	0.0851948	-0.366157
-0.654571	2.0851	-0.300639	0.768382	NaN	NaN	0.200863	NaN	0.140756	NaN		+										3.75e-132	323.47	80907000	1	323.47	-0.35761	0.0458584	0.214146	-0.393701	0.795427	4	NaN	NaN	NaN	NaN	NaN	0.058782	0.24245	-0.532393	0.813905	4	NaN	NaN	NaN	NaN	NaN	0.145467	0.381924	NaN
-0.670894	2.06079	-1.4195	4.33485	NaN	NaN	-0.0323514	0.653063	-1.33583	0.0643807		+		+		+	-					7.36e-78	275.07	4581300000	1	232.17	0.46907	0.0371413	0.192721	-0.527756	0.463053	5	0.0374333	0.193477	0.155715	1.15041	5	0.04747	0.217876	-1.89589	-0.775757	5	0.0451113	0.212394	-0.481596	0.610357	5	0.288272	-0.460999	0.0979395
-0.769675	2.15425	-1.25164	3.62196	NaN	NaN	-0.132831	NaN	-0.293835	NaN		+				+						4.19e-10	150.12	25745000	1	150.12	-0.3777	0.0371413	0.192721	-0.628235	0.362573	5	NaN	NaN	NaN	NaN	NaN	0.04747	0.217876	-0.853904	0.266233	5	NaN	NaN	NaN	NaN	NaN	-0.190672	-0.422405	0.301382
-0.778081	5.26039	-0.539744	1.96396	NaN	NaN	-0.424309	0.366258	-0.404659	0.147989		+										1.81e-10	152.4	1284500000	1	41.491	-3.0698	0.0371413	0.192721	-0.919713	0.0710957	5	0.0374333	0.193477	-0.13109	0.863606	5	0.04747	0.217876	-0.964728	0.155409	5	0.0451113	0.212394	-0.397988	0.693965	5	-0.390302	-0.267218	-0.415445
-0.786492	5.68111	-0.728638	3.86902	NaN	NaN	0.400435	1.18971	0.688529	1.41491		+		+		+	+	+				3.96e-07	147.37	1065900000	1	96.229	0.024114	0.0371413	0.192721	-0.0949695	0.895839	5	0.0374333	0.193477	0.692366	1.68706	5	0.04747	0.217876	0.128461	1.2486	5	0.0451113	0.212394	0.868929	1.96088	5	0.586847	0.614064	0.337476
-0.867068	2.6356	-0.591587	1.6087	NaN	NaN	-0.00780557	0.861786	0.075484	0.674663		+		+				+				7.09e-24	198.33	4810000000	1	97.594	-0.098921	0.0371413	0.192721	-0.50321	0.487599	5	0.0374333	0.193477	0.364438	1.35913	5	0.04747	0.217876	-0.484584	0.635552	5	0.0451113	0.212394	0.128686	1.22064	5	0.153933	0.164372	-0.470429
-0.87373	4.69683	-1.12068	4.7658	NaN	NaN	-0.0346374	0.841518	-1.35024	-0.235804		+		+		+	-					1.32e-135	330.42	12489000000	1	193.42	0.611	0.0371413	0.192721	-0.530042	0.460767	5	0.0374333	0.193477	0.34417	1.33887	5	0.04747	0.217876	-1.91031	-0.790169	5	0.0451113	0.212394	-0.781781	0.310172	5	0.124989	0.120629	-0.0518121
-0.929215	5.49466	-0.658549	2.32685	NaN	NaN	0.107306	1.03405	-1.15455	-0.48346		+		+		+	-					2.13e-271	431.67	2274900000	1	340.49	0.19632	0.0371413	0.192721	-0.388099	0.60271	5	0.0374333	0.193477	0.536699	1.53139	5	0.04747	0.217876	-1.71462	-0.594481	5	0.0451113	0.212394	-1.02944	0.0625163	5	0.064919	0.300335	0.0540568
-0.932149	1.82202	-1.07071	0.835384	NaN	NaN	-0.460123	0.0672287	-0.139234	0.381759		+										0.00134316	82.069	150050000	1	46.318	0.21186	0.0371413	0.192721	-0.955528	0.0352809	5	0.0858582	0.293016	-1.19352	1.32797	2	0.04747	0.217876	-0.699302	0.420834	5	0.105853	0.325351	-1.01811	1.78163	2	-0.641809	-0.274989	-0.263002
-0.946848	6.0788	-1.10362	6.53187	NaN	NaN	0.241306	1.18313	-1.51907	-0.419882		+		+		+	-					1.34e-53	242.93	15172000000	1	179.9	-0.15427	0.0371413	0.192721	-0.254098	0.73671	5	0.0374333	0.193477	0.685784	1.68048	5	0.04747	0.217876	-2.07914	-0.959005	5	0.0451113	0.212394	-0.965858	0.126095	5	0.447784	0.457081	0.203694
-0.957884	2.01722	-0.683206	1.81883	NaN	NaN	-0.0170108	0.938072	-0.014862	0.672541		+		+		+		+				2.31e-62	257.55	876470000	1	194	-0.064559	0.0371413	0.192721	-0.512415	0.478393	5	0.0374333	0.193477	0.440724	1.43542	5	0.04747	0.217876	-0.57493	0.545206	5	0.0451113	0.212394	0.126565	1.21852	5	-0.197551	-0.16925	0.980088
-0.959624	4.26564	-1.16695	3.93401	NaN	NaN	-0.368648	0.591992	-0.337095	0.815136		+		+		+		+				2.46e-13	164.81	1207500000	1	85.554	-2.0812	0.0371413	0.192721	-0.864052	0.126756	5	0.0374333	0.193477	0.0946437	1.08934	5	0.04747	0.217876	-0.897163	0.222974	5	0.0451113	0.212394	0.269159	1.36111	5	-0.117854	-0.247335	-0.453987
-0.977354	3.30297	-0.477053	1.00875	NaN	NaN	-0.363801	NaN	-0.395849	NaN		+										1.43e-13	171.99	287290000	1	93.766	1.5147	0.0371413	0.192721	-0.859206	0.131603	5	NaN	NaN	NaN	NaN	NaN	0.04747	0.217876	-0.955917	0.16422	5	NaN	NaN	NaN	NaN	NaN	-0.504985	0.105688	-0.358682
-1.09959	3.21018	-1.98626	5.917	NaN	NaN	0.00687213	1.09492	-1.28496	0.657116		+		+		+	-	+				5.19e-10	167.12	2957000000	1	132.88	0.26423	0.0371413	0.192721	-0.488532	0.502276	5	0.0374333	0.193477	0.597576	1.59227	5	0.04747	0.217876	-1.84503	-0.72489	5	0.0451113	0.212394	0.111139	1.20309	5	-0.0456089	0.378037	-0.554985
-1.28259	2.34147	-1.15128	2.46546	NaN	NaN	-0.431794	0.433783	-0.182237	0.678434		+				+						1.35e-07	132.79	26022000	1	132.79	1.8585	0.0458584	0.214146	-1.02636	0.16277	4	0.150995	0.388581	-4.50361	5.37118	1	0.0587819	0.24245	-0.855386	0.490912	4	0.192129	0.438325	-4.89102	6.24789	1	-0.272802	-0.465016	-0.831163
-1.4205	4.05335	-1.52264	5.8165	NaN	NaN	-0.274401	1.11852	0.0393831	1.52948		+		+		+		+				4.46e-291	444.75	1998800000	1	418.78	0.17181	0.0371413	0.192721	-0.769805	0.221003	5	0.0374333	0.193477	0.621171	1.61587	5	0.04747	0.217876	-0.520685	0.599452	5	0.0451113	0.212394	0.983505	2.07546	5	0.251129	-0.442441	-0.428394
-1.77338	3.73406	-1.64394	3.5146	NaN	NaN	-0.333918	1.38165	-0.100446	1.49571		+		+		+		+				5.95e-23	163.75	941390000	1	145.77	0.78662	0.0458584	0.214146	-0.928482	0.260646	4	0.0374333	0.193477	0.8843	1.879	5	0.058782	0.24245	-0.773595	0.572703	4	0.0451113	0.212394	0.949734	2.04169	5	NaN	-0.738922	-0.140244
-1.96009	1.42713	-0.381158	0.571832	NaN	NaN	-0.0511081	1.84667	-0.071928	0.326886		+		+								1.28e-45	232.17	466280000	1	171.09	2.5067	0.0371413	0.192721	-0.546512	0.444296	5	0.0374333	0.193477	1.34932	2.34402	5	0.04747	0.217876	-0.631996	0.48814	5	0.0451113	0.212394	-0.219091	0.872862	5	-1.36785	0.322682	0.335708
-2.18017	2.4704	-1.81967	1.80729	NaN	NaN	0.0435475	1.89879	0.083519	2.03406		+		+		+		+				1.27e-13	163.51	170530000	1	163.51	-0.107	0.0458584	0.214146	-0.551016	0.638112	4	0.085858	0.293015	0.638048	3.15954	2	0.058782	0.24245	-0.58963	0.756668	4	0.105853	0.325351	0.634185	3.43393	2	0.0347419	NaN	0.494669
-2.82967	2.47957	0.10411	0.803613	NaN	NaN	-0.148683	2.56779	-0.955591	-1.01537		+		+			-	-				1.59e-16	183.13	11018000000	1	183.13	0.30848	0.0371413	0.192721	-0.644087	0.346722	5	0.0374333	0.193477	2.07044	3.06514	5	0.04747	0.217876	-1.51566	-0.395523	5	0.0451113	0.212394	-1.56135	-0.469392	5	-0.97043	0.342379	0.204504
-3.37872	4.80332	-1.76999	5.95127	NaN	NaN	0.386238	3.93246	-0.0825217	1.7607		+				+						6.04e-23	175.88	126690000	1	175.88	-1.4911	0.0371413	0.192721	-0.109166	0.881642	5	0.150995	0.388581	-1.00493	8.86986	1	0.04747	0.217876	-0.64259	0.477547	5	0.192129	0.438326	-3.80875	7.33016	1	-0.0271086	0.531383	0.586225
1.87378	1.08693	0.248053	1.26307	NaN	NaN	1.93156	0.202475	0.107947	-0.0963216			+									7.83e-08	165.58	1129100000	1	160.16	1.0831	0.0371413	0.192721	1.43615	2.42696	5	0.0374333	0.193477	-0.294873	0.699823	5	0.04747	0.217876	-0.452121	0.668016	5	0.0451113	0.212394	-0.642298	0.449655	5	2.54359	-0.0220472	3.94183
1.718	1.24097	0.350266	0.168819	NaN	NaN	2.57021	NaN	0.833446	NaN			+									1.52e-80	239.31	82293000	1	239.31	-0.51189	0.0599259	0.244798	1.79115	3.34926	3	NaN	NaN	NaN	NaN	NaN	0.0771789	0.277811	-0.0506728	1.71756	3	NaN	NaN	NaN	NaN	NaN	NaN	4.6023	1.23945
1.68552	1.18153	1.89048	1.5373	NaN	NaN	1.19655	-0.331629	1.86836	0.0930529			+		++	+	+					0.000223513	121.6	264870000	1	72.365	-1.679	0.0458584	0.214146	0.601982	1.79111	4	0.0374333	0.193477	-0.828977	0.165719	5	0.058782	0.24245	1.19521	2.54151	4	0.0451113	0.212394	-0.452924	0.639029	5	1.54627	NaN	1.00022
1.53529	1.26016	2.12968	1.0155	NaN	NaN	1.2588	-0.0176067	1.64075	-0.214543			+				+					1.3e-24	204.94	1626900000	1	57.267	0.48044	0.0458584	0.214146	0.664234	1.85336	4	0.0460981	0.214705	-0.613723	0.578509	4	0.058782	0.24245	0.967603	2.3139	4	0.0557777	0.236173	-0.870264	0.441179	4	NaN	0.409537	0.528251
1.48857	1.1028	2.5818	3.87403	NaN	NaN	1.39989	NaN	1.66494	NaN			+		++	+	+					2.3e-07	120.14	333520000	1	120.14	-0.22406	0.0458584	0.214146	0.805327	1.99445	4	NaN	NaN	NaN	NaN	NaN	0.0587819	0.24245	0.991787	2.33808	4	NaN	NaN	NaN	NaN	NaN	0.837354	3.80517	0.272138
1.4522	0.861264	0.160613	0.0794496	NaN	NaN	1.0458	-0.277024	0.427408	0.304749			+									4.16e-07	151.07	1165400000	1	139.78	-0.24622	0.0371413	0.192721	0.550391	1.5412	5	0.0374333	0.193477	-0.774372	0.220324	5	0.04747	0.217876	-0.132661	0.987476	5	0.0451113	0.212394	-0.241227	0.850726	5	1.00072	0.689786	1.00588
1.40696	0.640055	1.3922	0.735264	NaN	NaN	1.50045	0.215093	2.35039	1.03726			+				+	+				2.69e-65	249.28	243740000	1	249.28	-0.13825	0.0371413	0.192721	1.00504	1.99585	5	0.0374333	0.193477	-0.282255	0.712441	5	0.04747	0.217876	1.79032	2.91046	5	0.0451113	0.212394	0.491285	1.58324	5	-0.510415	1.34983	2.82055
1.39608	0.969956	0.842028	0.655987	NaN	NaN	1.24282	-0.0998926	0.715921	-0.328012			+				+					0	578.76	381730000	1	136.14	-0.5427	0.0371413	0.192721	0.747418	1.73823	5	0.0599862	0.244921	-0.87934	0.679555	3	0.04747	0.217876	0.155853	1.27599	5	0.0730557	0.270288	-1.18819	0.532166	3	0.431655	-0.0749213	0.204057
1.34398	0.759361	0.390334	0.526593	NaN	NaN	1.57766	NaN	0.552063	NaN			+									4.6e-35	200.95	58807000	1	70.529	-2.1626	0.0599259	0.244798	0.798607	2.35672	3	NaN	NaN	NaN	NaN	NaN	0.0771789	0.277811	-0.332055	1.43618	3	NaN	NaN	NaN	NaN	NaN	NaN	1.00861	3.96753
1.22046	0.854379	1.0544	0.574773	NaN	NaN	2.04008	0.924053	2.11297	1.12451			+	+			+	+				2.58e-18	161.94	1458100000	1	161.94	0.17317	0.0371413	0.192721	1.54467	2.53548	5	0.0374333	0.193477	0.426705	1.4214	5	0.04747	0.217876	1.5529	2.67304	5	0.0451113	0.212394	0.578532	1.67049	5	2.57811	1.96715	2.22807
1.18625	1.204	0.925567	0.7836	NaN	NaN	0.548083	-0.519137	0.75438	-0.0872016			+	-			+					0.000731417	110.41	3147000000	1	98.582	-0.095476	0.0371413	0.192721	0.0526787	1.04349	5	0.0374333	0.193477	-1.01649	-0.0217894	5	0.0587819	0.24245	0.0812308	1.42753	4	0.0451113	0.212394	-0.633178	0.458775	5	1.90133	2.04918	-0.312355
1.18231	0.368445	-0.0119507	0.0259025	NaN	NaN	1.82259	0.744865	1.06714	1.10548			+	+			+	+				1.94e-18	172.3	1493200000	1	172.3	-0.00029753	0.0371413	0.192721	1.32719	2.318	5	0.0374333	0.193477	0.247517	1.24221	5	0.04747	0.217876	0.507073	1.62721	5	0.0451113	0.212394	0.559506	1.65146	5	1.37574	0.819043	1.42775
1.17831	1.2363	0.590672	1.34785	NaN	NaN	0.75001	NaN	-0.343321	NaN			+									6.13e-47	221.86	36758000	1	221.86	0.78442	0.0458584	0.214146	0.155447	1.34457	4	NaN	NaN	NaN	NaN	NaN	0.0587819	0.24245	-1.01647	0.329828	4	NaN	NaN	NaN	NaN	NaN	0.517079	0.307046	0.231062
1.17799	1.11373	-1.05205	0.871652	NaN	NaN	0.985168	-0.000402055	-0.160603	0.832477			+					+				0.000914273	89.913	137230000	1	62.005	-0.25183	0.0458584	0.214146	0.390604	1.57973	4	0.0460981	0.214705	-0.596518	0.595714	4	0.058782	0.24245	-0.833752	0.512546	4	0.0557777	0.236173	0.176756	1.4882	4	0.598687	NaN	1.458
1.17398	0.720659	0.836909	0.518989	NaN	NaN	0.931008	-0.116463	0.607243	-0.163777			+									3.98e-71	254.75	687810000	1	117.03	-1.274	0.0458584	0.214146	0.336444	1.52557	4	0.0374333	0.193477	-0.613811	0.380885	5	0.058782	0.24245	-0.0659057	1.28039	4	0.0451113	0.212394	-0.709754	0.382199	5	-0.0204959	NaN	0.307329
1.11424	1.25183	0.861156	1.10596	NaN	NaN	0.676598	-0.324349	1.36265	0.563845			+				+	+				1.37e-88	299.89	2576100000	1	233.62	0.1391	0.0371413	0.192721	0.181194	1.172	5	0.0374333	0.193477	-0.821697	0.172999	5	0.04747	0.217876	0.802578	1.92271	5	0.0451113	0.212394	0.0178682	1.10982	5	-0.530935	-0.146462	1.55122
1.08593	1.12511	0.858015	0.775057	NaN	NaN	1.44399	0.461112	1.84771	1.07388			+				+	+				8.6e-46	237.07	9101400000	1	205.96	0.031143	0.0371413	0.192721	0.948586	1.93939	5	0.0374333	0.193477	-0.0362358	0.95846	5	0.0587819	0.24245	1.17456	2.52086	4	0.0451113	0.212394	0.527902	1.61986	5	2.83673	2.94339	0.64895
1.07279	0.88371	0.440929	0.650333	NaN	NaN	2.66187	1.7143	2.85882	2.48289			+	+			+	+				7.4e-14	171.14	115230000	1	171.14	-0.027108	0.0458584	0.214146	2.06731	3.25643	4	0.0374333	0.193477	1.21695	2.21164	5	0.058782	0.24245	2.18567	3.53197	4	0.0451113	0.212394	1.93691	3.02886	5	3.24582	1.83403	3.37714
1.05682	0.979814	1.74448	1.09768	NaN	NaN	2.26045	1.29583	4.82538	3.15944			+	+			+	+				1.2e-140	315.96	3313600000	1	269.04	0.61869	0.0371413	0.192721	1.76504	2.75585	5	0.0374333	0.193477	0.798481	1.79318	5	0.04747	0.217876	4.26531	5.38545	5	0.0451113	0.212394	2.61347	3.70542	5	3.27014	2.01406	3.05987
1.05275	1.22568	-0.480002	0.490745	NaN	NaN	1.22465	0.275413	0.413233	0.903508			+					+				3.21e-15	141.21	1694800000	1	103.05	0.05401	0.0371413	0.192721	0.729248	1.72006	5	0.0374333	0.193477	-0.221935	0.772761	5	0.04747	0.217876	-0.146836	0.973301	5	0.0451113	0.212394	0.357532	1.44948	5	2.6307	1.68605	0.438939
1.04713	1.53241	0.240044	1.20884	NaN	NaN	0.990912	0.177969	0.0230793	-0.120762			+									0.000378898	110.84	84354000	1	96.113	0.10531	0.0599259	0.244798	0.211857	1.76997	3	0.0460981	0.214705	-0.418147	0.774085	4	0.0771789	0.277811	-0.861039	0.907198	3	0.0557777	0.236173	-0.776483	0.53496	4	1.27059	NaN	1.08847
1.02783	1.02425	1.07631	2.19851	NaN	NaN	1.36834	0.358945	2.24979	1.28699			+		++	+	+	+				1.27e-61	226.44	194290000	1	226.44	-2.0832	0.0599259	0.244798	0.589285	2.1474	3	0.0460981	0.214705	-0.23717	0.955061	4	0.0771789	0.277811	1.36567	3.13391	3	0.0557776	0.236173	0.631268	1.94271	4	NaN	2.09252	NaN
1.00439	0.311262	0.152432	0.501594	NaN	NaN	0.71725	-0.180865	-0.286578	-0.396853			+									1.59e-66	248.25	4754700000	1	183.7	0.18804	0.0371413	0.192721	0.221845	1.21265	5	0.0374333	0.193477	-0.678213	0.316483	5	0.04747	0.217876	-0.846647	0.27349	5	0.0451113	0.212394	-0.942829	0.149124	5	0.187916	-0.0413503	0.00946064
1.00348	0.802329	0.294177	0.453802	NaN	NaN	1.18711	0.212967	0.463721	0.237528			+									7.1e-35	185.17	194180000	1	185.17	-1.9825	0.0371413	0.192721	0.691702	1.68251	5	0.0460982	0.214705	-0.38315	0.809083	4	0.058782	0.24245	-0.209428	1.13687	4	0.0557778	0.236173	-0.418194	0.89325	4	0.554395	1.30419	0.998172
1.00249	0.594369	2.39602	1.60849	NaN	NaN	0.935463	0.420139	1.52563	-0.436654			+		++	+	+					3.89e-93	298.15	99623000	1	207.37	0.7844	0.0458584	0.214146	0.340899	1.53003	4	0.085858	0.293015	-0.840604	1.68088	2	0.058782	0.24245	0.852478	2.19878	4	0.105853	0.325351	-1.83653	0.963218	2	1.02698	NaN	2.28182
0.968803	0.644553	1.45315	0.518696	NaN	NaN	0.841564	-0.024472	2.13481	0.764743			+				+	+				3.83e-52	214.11	17559000000	1	142.67	-0.1713	0.0371413	0.192721	0.34616	1.33697	5	0.0374333	0.193477	-0.52182	0.472876	5	0.04747	0.217876	1.57474	2.69488	5	0.0451113	0.212394	0.218767	1.31072	5	0.910949	0.892487	1.09327
0.963146	1.50838	-0.0110898	0.0126541	NaN	NaN	0.965843	0.119721	1.52774	1.56232			+				+	+				1.6e-09	155.86	6842600000	1	143.03	-0.023626	0.0458584	0.214146	0.371279	1.56041	4	0.0374333	0.193477	-0.377627	0.617069	5	0.04747	0.217876	0.967672	2.08781	5	0.0451113	0.212394	1.01634	2.10829	5	0.467875	1.28106	2.13688
0.952461	0.489586	1.86181	0.650024	NaN	NaN	1.70857	0.858299	3.20754	1.58755			+	+			+	+				4.35e-45	226.72	703170000	1	226.72	0.44418	0.0371413	0.192721	1.21317	2.20398	5	0.0460981	0.214705	0.262183	1.45441	4	0.04747	0.217876	2.64747	3.76761	5	0.0557776	0.236173	0.931829	2.24327	4	1.83766	2.07661	2.23851
0.932357	1.41697	1.29696	2.1374	NaN	NaN	1.46064	0.621973	2.11442	0.89391			+	+	++	+	+	+				0.00011077	120.15	226360000	1	85.862	-0.34539	0.0371413	0.192721	0.965241	1.95605	5	0.0374333	0.193477	0.124625	1.11932	5	0.04747	0.217876	1.55435	2.67449	5	0.0451113	0.212394	0.347934	1.43989	5	1.7662	1.03403	1.82731
0.912979	1.2173	1.21082	1.62218	NaN	NaN	0.706103	-0.105935	1.65577	0.52059			+		++	+	+					2.72e-53	237.34	791840000	1	122.1	-0.24079	0.0371413	0.192721	0.210699	1.20151	5	0.0374333	0.193477	-0.603283	0.391413	5	0.04747	0.217876	1.0957	2.21584	5	0.0451113	0.212394	-0.0253869	1.06657	5	0.480147	0.745826	1.049
0.877293	0.853559	-0.0118329	0.0283637	NaN	NaN	0.839362	0.0593914	-0.0312377	0.0140017			+									8.13e-08	154.35	431040000	1	154.35	0.31942	0.0371413	0.192721	0.343958	1.33477	5	0.0374333	0.193477	-0.437957	0.556739	5	0.04747	0.217876	-0.591306	0.528831	5	0.0451113	0.212394	-0.531975	0.559978	5	0.157269	0.0186013	1.96023
0.866037	0.81199	0.56354	0.447677	NaN	NaN	0.648051	-0.119203	0.409894	-0.0863395			+									1.94e-06	169.82	9331300000	1	151.22	-0.42358	0.0371413	0.192721	0.152647	1.14346	5	0.0374333	0.193477	-0.616551	0.378145	5	0.0587819	0.24245	-0.263255	1.08304	4	0.0451113	0.212394	-0.632316	0.459637	5	1.98156	2.21224	-0.220228
0.865243	0.726519	0.354354	0.387262	NaN	NaN	1.16785	0.395543	1.53908	1.22398			+				+	+				2.83e-97	291.59	10816000000	1	291.59	-0.53588	0.0371413	0.192721	0.672443	1.66325	5	0.0374333	0.193477	-0.101805	0.892891	5	0.04747	0.217876	0.979009	2.09915	5	0.0451113	0.212394	0.678005	1.76996	5	1.24087	1.01579	3.03964
0.858841	1.02916	0.885693	0.937257	NaN	NaN	1.51581	0.745642	1.4472	0.624383			+	+			+	+				1.39e-24	183.71	3744800000	1	118.52	-0.18961	0.0371413	0.192721	1.0204	2.01121	5	0.0374333	0.193477	0.248294	1.24299	5	0.04747	0.217876	0.887128	2.00726	5	0.0451113	0.212394	0.078406	1.17036	5	2.04271	1.59626	1.54147
0.856098	1.64805	0.18158	0.57306	NaN	NaN	1.39052	0.624333	2.92984	2.77115			+	+			+	+				1.01e-18	175.97	704120000	1	96.067	-0.82062	0.0371413	0.192721	0.895117	1.88593	5	0.0374333	0.193477	0.126985	1.12168	5	0.04747	0.217876	2.36977	3.48991	5	0.0451113	0.212394	2.22517	3.31713	5	1.98407	1.55856	1.79298
0.854998	0.599614	0.410354	0.34697	NaN	NaN	1.09087	0.351612	1.22398	0.87933			+				+	+				3.65e-27	175	277460000	1	130.73	-3.3091	0.0599259	0.244798	0.311815	1.86993	3	0.0374333	0.193477	-0.145736	0.84896	5	0.0771789	0.277811	0.339861	2.1081	3	0.0451113	0.212394	0.333354	1.42531	5	NaN	2.43046	NaN
0.854671	0.608181	0.161998	0.203557	NaN	NaN	0.716801	-0.0405336	-0.0274103	-0.144916			+									1.31e-261	416.98	6307600000	1	390.86	-0.021099	0.0371413	0.192721	0.221396	1.21221	5	0.0374333	0.193477	-0.537882	0.456814	5	0.058782	0.24245	-0.700559	0.645739	4	0.0451113	0.212394	-0.690893	0.40106	5	0.160093	0.207256	0.353328
0.839226	1.67136	0.678467	1.09929	NaN	NaN	1.57085	0.818516	2.53894	1.9074			+	+			+	+				5.38e-80	245.47	931810000	1	140.45	-0.15546	0.0371413	0.192721	1.07545	2.06626	5	0.0374333	0.193477	0.321168	1.31586	5	0.04747	0.217876	1.97887	3.099	5	0.0451113	0.212394	1.36142	2.45337	5	2.10178	1.39697	1.95618
0.834443	1.61156	0.736877	0.862867	NaN	NaN	1.54199	1.10171	2.26351	2.19238			+				+	+				1.25e-18	166.37	378440000	1	166.37	0.75859	0.0599259	0.244798	0.762935	2.32105	3	0.0858583	0.293016	-0.159031	2.36246	2	0.0771789	0.277811	1.37939	3.14762	3	0.105854	0.325351	0.792503	3.59225	2	NaN	1.88573	NaN
0.821534	0.644189	-0.191454	0.322839	NaN	NaN	3.45614	2.74258	1.85822	2.07456			+	+			+	+				9.4e-05	100.45	105770000	1	100.45	0.15675	0.0458584	0.214146	2.86157	4.0507	4	0.0374333	0.193477	2.24524	3.23993	5	0.058782	0.24245	1.18507	2.53137	4	0.0451113	0.212394	1.52858	2.62054	5	4.71655	NaN	3.33855
0.788873	0.701635	1.14852	1.37247	NaN	NaN	0.55784	-0.428509	-0.0655928	-1.06472			+									3.92e-20	164.31	267030000	1	128.82	1.3327	0.0371413	0.192721	0.0624354	1.05324	5	0.150995	0.388581	-5.3659	4.50888	1	0.04747	0.217876	-0.625661	0.494476	5	0.192129	0.438325	-6.63417	4.50473	1	2.38574	-0.322991	1.47084
0.772791	0.9894	-0.375044	0.334408	NaN	NaN	0.523022	-0.158475	0.164975	0.487833			+									1.86e-65	237.13	918610000	1	237.13	1.239	0.0371413	0.192721	0.0276181	1.01843	5	0.0460981	0.214705	-0.754591	0.437641	4	0.04747	0.217876	-0.395094	0.725043	5	0.0557777	0.236173	-0.167889	1.14355	4	0.168883	0.204076	0.64362
0.762304	0.562526	-0.186848	0.0965557	NaN	NaN	1.32716	0.649864	0.162282	0.373714			+	+								5.72e-89	294.04	1913800000	1	208.38	-0.3776	0.0371413	0.192721	0.831753	1.82256	5	0.0374333	0.193477	0.152516	1.14721	5	0.04747	0.217876	-0.397786	0.722351	5	0.0451113	0.212394	-0.172262	0.919691	5	0.0284735	2.12204	1.59823
0.761749	1.00975	0.549366	1.02398	NaN	NaN	0.844139	0.172754	0.608951	0.113234			+				+					2.83e-61	258.96	1447200000	1	102.29	0.079559	0.0371413	0.192721	0.348735	1.33954	5	0.0374333	0.193477	-0.324594	0.670102	5	0.04747	0.217876	0.0488825	1.16902	5	0.0451113	0.212394	-0.432743	0.659211	5	1.91617	0.92061	0.887242
0.759621	1.38715	0.465676	1.01096	NaN	NaN	0.534365	-0.131566	1.42027	0.999435			+				+	+				1.55e-50	225.53	2003600000	1	145.81	0.23445	0.0371413	0.192721	0.0389603	1.02977	5	0.0374333	0.193477	-0.628914	0.365782	5	0.04747	0.217876	0.8602	1.98034	5	0.0451113	0.212394	0.453458	1.54541	5	0.262651	0.125511	1.36018
0.759248	0.370971	0.572825	0.220563	NaN	NaN	1.19778	0.524805	0.888699	0.368754			+	+			+					2.19e-22	165.34	26019000000	1	50.563	0.24198	0.0371413	0.192721	0.702378	1.69319	5	0.0374333	0.193477	0.0274571	1.02215	5	0.04747	0.217876	0.328631	1.44877	5	0.0451113	0.212394	-0.177222	0.914731	5	-0.961446	2.47204	2.00633
0.755705	0.661321	0.626468	0.585039	NaN	NaN	1.04821	0.380231	-0.201011	-0.765318			+					-				9.54e-180	361.64	4002600000	1	254.7	-0.28748	0.0371413	0.192721	0.552805	1.54361	5	0.0374333	0.193477	-0.117117	0.877579	5	0.04747	0.217876	-0.76108	0.359057	5	0.0451113	0.212394	-1.31129	-0.219341	5	1.18012	1.25853	1.06816
0.754426	0.91158	0.987514	1.65829	NaN	NaN	0.724464	-0.124211	1.33512	0.214641			+		++	+	+					6.28e-11	153.49	129640000	1	126.19	2.8189	0.0458584	0.214146	0.1299	1.31903	4	0.0858583	0.293016	-1.38496	1.13653	2	0.058782	0.24245	0.66197	2.00827	4	0.105854	0.325351	-1.18523	1.61452	2	0.911709	1.20629	NaN
0.753608	0.662534	0.301924	0.587143	NaN	NaN	1.40974	0.739707	0.0953669	-0.160357			+	+								4.04e-92	296.51	2609700000	1	197.75	0.5694	0.0371413	0.192721	0.914341	1.90515	5	0.0374333	0.193477	0.242359	1.23705	5	0.04747	0.217876	-0.464702	0.655435	5	0.0451113	0.212394	-0.706334	0.385619	5	-0.131053	3.06652	1.62855
0.745872	1.10698	-1.09229	1.14325	NaN	NaN	1.77555	1.10871	0.70735	1.78149			+	+			+	+				1.59e-29	209.22	4268800000	1	103.05	0.05401	0.0371413	0.192721	1.28015	2.27095	5	0.0374333	0.193477	0.611359	1.60605	5	0.04747	0.217876	0.147281	1.26742	5	0.0451113	0.212394	1.23552	2.32747	5	3.22673	1.83389	1.42658
0.742118	1.81476	0.418528	0.954897	NaN	NaN	1.94217	1.277	2.13949	1.75917			+	+			+	+				4.56e-94	287.57	726130000	1	287.57	-0.84835	0.0371413	0.192721	1.44676	2.43757	5	0.0374333	0.193477	0.779647	1.77434	5	0.04747	0.217876	1.57942	2.69956	5	0.0451113	0.212394	1.21319	2.30514	5	1.97649	2.111	2.65398
0.730328	0.859083	0.687256	0.973135	NaN	NaN	1.34226	0.694865	1.9471	1.31093			+	+			+	+				2.58e-42	222.1	6157800000	1	47.603	0.41161	0.0371413	0.192721	0.846857	1.83767	5	0.0374333	0.193477	0.197517	1.19221	5	0.04747	0.217876	1.38703	2.50717	5	0.0451113	0.212394	0.764954	1.85691	5	0.880755	1.90579	1.9368
0.721672	1.67488	1.10771	3.38597	NaN	NaN	0.732346	0.333286	0.815424	-0.291167			+		++	+	+					4.17e-99	272.68	95244000	1	251.33	-0.52256	0.0458584	0.214146	0.137782	1.32691	4	0.0858583	0.293016	-0.92746	1.59403	2	0.058782	0.24245	0.142275	1.48857	4	0.105854	0.325352	-1.69104	1.10871	2	0.428171	0.607826	NaN
0.721603	1.64609	0.715898	0.894217	NaN	NaN	0.969396	0.334361	2.11333	1.4487			+				+	+				8.22e-10	153.05	5567100000	1	60.436	0.019127	0.0371413	0.192721	0.473992	1.4648	5	0.0374333	0.193477	-0.162987	0.831709	5	0.04747	0.217876	1.55326	2.6734	5	0.0451113	0.212394	0.902721	1.99467	5	1.10998	1.00273	1.16256
0.720174	1.04481	-0.336797	0.30098	NaN	NaN	1.63696	0.995822	0.87532	1.22565			+	+			+	+				1.92e-131	338.5	5517600000	1	338.5	0.66534	0.0371413	0.192721	1.14155	2.13236	5	0.0374333	0.193477	0.498474	1.49317	5	0.04747	0.217876	0.315251	1.43539	5	0.0451113	0.212394	0.679673	1.77163	5	1.30803	1.39991	1.88344
0.703549	1.3663	0.415484	0.825389	NaN	NaN	1.02698	0.40828	1.95143	1.59708			+				+	+				1.24e-188	359.37	4040900000	1	321.38	-0.11252	0.0371413	0.192721	0.531577	1.52239	5	0.0374333	0.193477	-0.0890683	0.905628	5	0.058782	0.24245	1.27828	2.62458	4	0.0451113	0.212394	1.0511	2.14306	5	1.25598	1.2352	1.47981
0.703392	1.68008	1.49816	3.118	NaN	NaN	0.762501	-0.110338	0.749348	-0.930775			+		++	+	+					8.84e-19	172.6	760020000	1	81.788	-0.90261	0.0371413	0.192721	0.267097	1.25791	5	0.150995	0.388581	-5.04773	4.82705	1	0.04747	0.217876	0.189279	1.30942	5	0.192129	0.438325	-6.50022	4.63867	1	0.280185	0.450796	1.32818
0.692726	1.13031	-0.0993216	0.101097	NaN	NaN	0.611741	0.00784488	-0.250309	-0.119975			+									4.47e-14	178.84	109790000	1	178.84	0.26858	0.0371413	0.192721	0.116337	1.10715	5	0.0374333	0.193477	-0.489503	0.505193	5	0.04747	0.217876	-0.810377	0.30976	5	0.0451113	0.212394	-0.665952	0.426001	5	-0.133511	1.422	1.51006
0.682776	0.47941	0.209858	0.267663	NaN	NaN	0.907013	0.30918	0.112289	-0.0506022			+									2.4e-77	276.05	504020000	1	276.05	-1.0271	0.0371413	0.192721	0.411609	1.40242	5	0.0374333	0.193477	-0.188167	0.806528	5	0.058782	0.24245	-0.56086	0.785438	4	0.0451113	0.212394	-0.596579	0.495374	5	0.336105	0.357757	0.618768
0.682186	1.35742	0.567303	1.71829	NaN	NaN	1.55258	0.948099	3.03961	2.51122			+	+			+	+				1.83e-60	255.16	385360000	1	251.28	0.24061	0.0371413	0.192721	1.05717	2.04798	5	0.0374333	0.193477	0.450751	1.44545	5	0.04747	0.217876	2.47954	3.59968	5	0.0451113	0.212394	1.96524	3.0572	5	2.36891	1.06593	1.86714
0.680243	1.81532	0.449065	1.68756	NaN	NaN	2.9899	2.37122	3.77654	3.35656			+	+			+	+				4.52e-14	178.71	2925200000	1	178.71	-0.19024	0.0371413	0.192721	2.4945	3.4853	5	0.0374333	0.193477	1.87387	2.86857	5	0.04747	0.217876	3.21647	4.33661	5	0.0451113	0.212394	2.81058	3.90253	5	3.40858	2.51938	3.43608
0.674451	0.506866	0.0420986	0.0357989	NaN	NaN	0.916318	0.326208	-0.197394	-0.202687			+									8.27e-48	233.57	3224400000	1	99.222	1.8676	0.0371413	0.192721	0.420913	1.41172	5	0.0374333	0.193477	-0.17114	0.823556	5	0.04747	0.217876	-0.757462	0.362675	5	0.0451113	0.212394	-0.748664	0.343289	5	1.40219	1.61958	-0.360816
0.67263	1.77243	1.74592	2.081	NaN	NaN	0.981128	0.392008	0.863326	-0.762734			+		++	+	+	-				1.94e-95	296.25	12968000000	1	224.09	-0.44863	0.0371413	0.192721	0.485723	1.47653	5	0.0374333	0.193477	-0.10534	0.889356	5	0.0587819	0.24245	0.190177	1.53647	4	0.0451113	0.212394	-1.30871	-0.216758	5	1.4323	0.73349	1.76724
0.672597	1.07215	0.486612	1.00718	NaN	NaN	0.697813	0.111884	1.67477	1.23229			+				+	+				3.41e-243	413.17	2365500000	1	396.47	-0.69704	0.0371413	0.192721	0.202409	1.19322	5	0.0374333	0.193477	-0.385464	0.609232	5	0.04747	0.217876	1.1147	2.23484	5	0.0451113	0.212394	0.686309	1.77826	5	1.9995	0.528261	0.502614
0.672227	0.972542	0.981008	0.701504	NaN	NaN	0.960834	0.37232	1.24153	0.328851			+				+					1.38e-06	112.44	423080000	1	112.44	-0.96917	0.0371413	0.192721	0.46543	1.45624	5	0.0374333	0.193477	-0.125028	0.869668	5	0.04747	0.217876	0.681466	1.8016	5	0.0451113	0.212394	-0.217126	0.874827	5	0.436566	0.298704	1.93136
0.657278	1.22279	0.764535	0.842927	NaN	NaN	1.3911	0.811839	0.54831	-0.15286			+	+								2.87e-45	236.37	1617900000	1	134.51	-0.11607	0.0371413	0.192721	0.895692	1.8865	5	0.0374333	0.193477	0.314491	1.30919	5	0.04747	0.217876	-0.0117581	1.10838	5	0.0451113	0.212394	-0.698837	0.393116	5	1.47316	1.53166	1.57392
0.644193	0.607297	0.133031	0.385477	NaN	NaN	1.44419	0.876645	0.481009	0.384395			+	+								4.35e-23	206.97	2241000000	1	72.175	-0.49741	0.0371413	0.192721	0.948787	1.9396	5	0.0374333	0.193477	0.379297	1.37399	5	0.04747	0.217876	-0.0790591	1.04108	5	0.0451113	0.212394	-0.161581	0.930372	5	0.290352	1.90379	2.28397
0.643492	1.73932	0.319192	0.792332	NaN	NaN	0.710619	0.107728	1.47129	1.38078			+				+	+				6.94e-21	182.23	132670000	1	145.31	0.15461	0.0371413	0.192721	0.215214	1.20602	5	0.0599863	0.244921	-0.67172	0.887176	3	0.04747	0.217876	0.91122	2.03136	5	0.0730558	0.270288	0.520607	2.24096	3	1.19335	0.743168	0.985749
0.640897	1.42049	0.044239	0.335873	NaN	NaN	0.928374	0.369679	0.883537	0.869296			+				+	+				3.33e-10	150.86	1784000000	1	150.86	0.11424	0.0371413	0.192721	0.432969	1.42378	5	0.0374333	0.193477	-0.127669	0.867027	5	0.04747	0.217876	0.323469	1.44361	5	0.0451113	0.212394	0.32332	1.41527	5	0.82883	0.39794	1.03895
0.639217	0.966667	0.7929	2.04099	NaN	NaN	1.85124	1.26179	2.48547	1.71857			+	+	++	+	+	+				4.46e-30	188.23	124970000	1	137.89	-1.3354	0.0458584	0.214146	1.25668	2.4458	4	0.0858582	0.293016	0.00104045	2.52253	2	0.0587819	0.24245	1.81232	3.15862	4	0.105853	0.325351	0.3187	3.11845	2	1.2175	1.63664	2.54275
0.625774	0.850597	0.36498	0.330277	NaN	NaN	1.87346	1.31845	2.09511	1.7663			+	+			+	+				6.58e-08	115.06	1039400000	1	112.57	-1.2015	0.0371413	0.192721	1.37806	2.36886	5	0.0374333	0.193477	0.821098	1.81579	5	0.04747	0.217876	1.53504	2.65518	5	0.0451113	0.212394	1.22032	2.31227	5	2.35426	2.28089	1.07758
0.610857	1.63386	0.624845	2.26385	NaN	NaN	2.90652	2.35401	3.35853	2.77305			+	+	++	+	+	+				4.87e-113	327.17	19919000000	1	310.68	-0.127	0.0371413	0.192721	2.41112	3.40192	5	0.0374333	0.193477	1.85666	2.85136	5	0.04747	0.217876	2.79846	3.91859	5	0.0451113	0.212394	2.22708	3.31903	5	3.2993	2.9615	2.79058
0.607604	1.06161	0.488083	1.62504	NaN	NaN	0.649545	0.125263	1.29638	0.854904			+				+	+				6.56e-65	230.51	438850000	1	105.63	0.2882	0.0371413	0.192721	0.154141	1.14495	5	0.0374333	0.193477	-0.372085	0.622611	5	0.04747	0.217876	0.736314	1.85645	5	0.0451113	0.212394	0.308928	1.40088	5	0.420355	0.176707	1.27096
0.604461	1.13677	0.144156	1.22794	NaN	NaN	0.647849	0.126541	1.89223	1.77597			+				+	+				0	439.63	15337000000	1	439.63	0.41344	0.0371413	0.192721	0.152445	1.14325	5	0.0374333	0.193477	-0.370807	0.623889	5	0.04747	0.217876	1.33216	2.4523	5	0.0451113	0.212394	1.22999	2.32194	5	0.967001	1.05117	1.32111
0.598737	0.834054	-0.0963894	0.334045	NaN	NaN	0.671111	0.116872	0.273107	0.231458			+									1.87e-10	127.41	197360000	1	127.41	0.11143	0.0458584	0.214146	0.0765473	1.26568	4	0.0599862	0.244921	-0.662575	0.89632	3	0.058782	0.24245	-0.400042	0.946256	4	0.0730557	0.270288	-0.62872	1.09164	3	0.236568	NaN	1.95318
0.598383	2.04703	-0.158854	0.229907	NaN	NaN	0.982018	0.462698	0.911169	1.09104			+				+	+				4.09e-06	97.965	24617000000	1	83.869	0.22741	0.0371413	0.192721	0.486614	1.47742	5	0.0374333	0.193477	-0.0346496	0.960046	5	0.04747	0.217876	0.351101	1.47124	5	0.0451113	0.212394	0.545065	1.63702	5	1.19313	0.863011	1.49165
0.583608	1.01544	0.327092	0.534876	NaN	NaN	1.80753	1.2929	2.85681	2.55938			+	+			+	+				5.39e-19	200.71	3611000000	1	76.357	-0.10622	0.0371413	0.192721	1.31213	2.30294	5	0.0374333	0.193477	0.795551	1.79025	5	0.04747	0.217876	2.29674	3.41688	5	0.0451113	0.212394	2.0134	3.10536	5	2.51534	2.26886	2.5152
0.583156	0.734438	0.311052	1.2085	NaN	NaN	0.746072	0.291254	0.464011	0.187236			+									3.72e-06	129.16	67383000	1	129.16	-0.27677	0.0371413	0.192721	0.250668	1.24148	5	0.0858583	0.293016	-0.969491	1.552	2	0.04747	0.217876	-0.0960572	1.02408	5	0.105854	0.325351	-1.21264	1.58711	2	1.25748	2.18209	0.625979
0.582878	0.711981	0.607359	0.454904	NaN	NaN	1.04039	0.535001	1.82447	1.26552			+	+			+	+				2.07e-231	399.09	1015200000	1	200.67	-0.25084	0.0371413	0.192721	0.544989	1.5358	5	0.0374333	0.193477	0.0376533	1.03235	5	0.04747	0.217876	1.2644	2.38454	5	0.0451113	0.212394	0.719539	1.81149	5	1.22668	1.08032	1.37063
0.577289	0.75925	0.79332	1.04892	NaN	NaN	0.985783	0.505276	2.59319	1.99678			+				+	+				0.000490406	114.5	104780000	1	68.626	0.28164	0.0458584	0.214146	0.39122	1.58035	4	0.0460982	0.214705	-0.0908411	1.10139	4	0.0587819	0.24245	1.92004	3.26633	4	0.0557778	0.236173	1.34105	2.6525	4	1.13473	1.24754	0.95138
0.570237	1.93471	0.654683	2.97586	NaN	NaN	1.88229	1.4499	2.48519	1.89168			+	+	++	+	+	+				4.11e-62	257.16	1058300000	1	257.16	-0.50228	0.0371413	0.192721	1.38688	2.37769	5	0.0460981	0.214705	0.853786	2.04602	4	0.04747	0.217876	1.92512	3.04526	5	0.0557777	0.236173	1.23596	2.5474	4	2.41719	1.64299	2.08196
0.569688	0.317905	0.160616	0.12011	NaN	NaN	1.65551	1.17002	3.06235	2.94122			+	+			+	+				2.15e-06	100.57	154440000	1	95.244	0.2737	0.0458584	0.214146	1.06095	2.25008	4	0.0374333	0.193477	0.672677	1.66737	5	0.058782	0.24245	2.3892	3.7355	4	0.0451113	0.212394	2.39525	3.4872	5	NaN	2.44913	1.55327
0.567922	0.297977	-0.441642	0.492376	NaN	NaN	2.22453	1.71999	-1.365	-0.900068			+	+			-	-				1.19e-73	229.31	1400400000	1	106.98	0.02418	0.0371413	0.192721	1.72912	2.71993	5	0.0374333	0.193477	1.22265	2.21734	5	0.04747	0.217876	-1.92507	-0.804929	5	0.0451113	0.212394	-1.44604	-0.354092	5	1.04091	3.74444	2.10543
0.552408	1.37523	0.917882	1.71785	NaN	NaN	1.12707	0.849183	1.33589	0.777766			+	+	++	+	+	+				3e-06	113.22	108290000	1	103.43	0.65982	0.0371413	0.192721	0.631661	1.62247	5	0.0460982	0.214705	0.253066	1.4453	4	0.04747	0.217876	0.775824	1.89596	5	0.0557778	0.236173	0.122044	1.43349	4	1.53183	1.14807	1.18872
0.545555	1.92741	0.209534	0.678998	NaN	NaN	1.48548	1.01022	2.23531	2.05431			+	+			+	+				1.09e-113	307.58	4049000000	1	170.35	-0.19303	0.0371413	0.192721	0.990077	1.98089	5	0.0374333	0.193477	0.512871	1.50757	5	0.04747	0.217876	1.67524	2.79538	5	0.0451113	0.212394	1.50833	2.60029	5	1.33077	1.474	2.02857
0.545549	0.898985	1.03913	1.27602	NaN	NaN	1.3372	1.06918	2.09222	1.29379			+	+			+	+				1.15e-93	253.87	491400000	1	247.42	0.20862	0.0371413	0.192721	0.841796	1.8326	5	0.0460981	0.214705	0.473067	1.6653	4	0.04747	0.217876	1.53216	2.65229	5	0.0557777	0.236173	0.638065	1.94951	4	1.2909	1.61114	1.43496
0.538307	0.694285	0.269064	0.234019	NaN	NaN	2.92253	2.43806	3.72833	3.48085			+	+			+	+				3.45e-15	169.17	1706400000	1	167.22	0.06102	0.0371413	0.192721	2.42712	3.41793	5	0.0374333	0.193477	1.94071	2.9354	5	0.04747	0.217876	3.16826	4.2884	5	0.0451113	0.212394	2.93488	4.02683	5	3.99214	2.6892	2.70552
0.538183	1.15959	0.178062	0.32352	NaN	NaN	1.77383	1.4409	1.71833	1.75154			+	+			+	+				6.02e-05	126.82	602660000	1	93.701	0.90004	0.0371413	0.192721	1.27843	2.26924	5	0.0460981	0.214705	0.844779	2.03701	4	0.04747	0.217876	1.15826	2.27839	5	0.0557776	0.236173	1.09582	2.40726	4	1.96719	2.22638	2.0296
0.535765	1.45881	0.689942	1.85299	NaN	NaN	1.54661	1.07987	2.85413	2.20959			+	+	++	+	+	+				3.62e-05	114.23	1090700000	1	67.187	0.58145	0.0371413	0.192721	1.05121	2.04202	5	0.0374333	0.193477	0.582527	1.57722	5	0.04747	0.217876	2.29406	3.41419	5	0.0451113	0.212394	1.66362	2.75557	5	1.80369	1.25162	1.5983
0.530738	1.80892	0.639567	1.5752	NaN	NaN	0.526168	-0.00849978	0.719804	0.158194			+				+					3.02e-38	221.86	67574000	1	86.214	-0.61188	0.0371413	0.192721	0.0307636	1.02157	5	0.0858583	0.293016	-1.26925	1.25225	2	0.04747	0.217876	0.159735	1.27987	5	0.105854	0.325352	-1.24168	1.55807	2	0.673232	0.724499	0.336535
0.525873	0.846784	0.392014	0.363115	NaN	NaN	1.27288	0.762616	1.66799	1.31841			+	+			+	+				1.68e-28	195.61	1724200000	1	131.02	-3.1254	0.0371413	0.192721	0.77748	1.76829	5	0.0460981	0.214705	0.1665	1.35873	4	0.04747	0.217876	1.10792	2.22806	5	0.0557777	0.236173	0.662688	1.97413	4	0.753755	1.6634	1.26616
0.525228	1.14417	0.325799	0.282997	NaN	NaN	0.555067	0.246063	1.06112	0.586375			+				+					6.04e-63	253.1	213180000	1	185.99	0.50098	0.0371413	0.192721	0.0596629	1.05047	5	0.0858583	0.293016	-1.01468	1.50681	2	0.04747	0.217876	0.501055	1.62119	5	0.105854	0.325352	-0.8135	1.98625	2	1.14116	0.55954	0.14259
0.516194	1.29888	0.240114	0.494502	NaN	NaN	0.700915	0.262007	0.322383	0.12434			+									1.93e-68	235.28	510370000	1	235.28	1.483	0.0371413	0.192721	0.205511	1.19632	5	0.0374333	0.193477	-0.235341	0.759355	5	0.04747	0.217876	-0.237686	0.882451	5	0.0451113	0.212394	-0.421636	0.670317	5	1.03679	0.664304	0.183224
0.51579	0.963876	0.498147	1.06761	NaN	NaN	0.614769	0.245106	0.937825	0.471502			+				+					1.5e-67	279.75	360350000	1	174.05	-0.51883	0.0371413	0.192721	0.119365	1.11017	5	0.0460981	0.214705	-0.35101	0.841222	4	0.04747	0.217876	0.377757	1.49789	5	0.0557777	0.236173	-0.184219	1.12722	4	1.22127	-0.114635	0.923216
0.515676	0.364318	0.233197	0.22714	NaN	NaN	0.697196	0.258817	0.519615	0.326932			+									8.38e-132	344.84	14169000000	1	322.79	-1.4702	0.0371413	0.192721	0.201792	1.1926	5	0.0374333	0.193477	-0.238531	0.756164	5	0.04747	0.217876	-0.0404532	1.07968	5	0.0451113	0.212394	-0.219045	0.872908	5	0.131132	0.181702	0.191777
0.514671	0.713434	-0.927404	1.53672	NaN	NaN	1.09959	0.666538	1.1141	1.73592			+				+	+				0.00138007	83.278	91491000	1	47.706	0.70576	0.0599259	0.244798	0.320531	1.87864	3	0.0858584	0.293016	-0.594208	1.92728	2	0.0771789	0.277811	0.229982	1.99822	3	0.105854	0.325352	0.336044	3.13579	2	NaN	0.782991	1.06795
0.513202	0.302898	0.0950488	0.0754387	NaN	NaN	0.900534	0.462213	0.668152	0.606679			+				+	+				1.33e-149	312.51	1935900000	1	225.48	0.070366	0.0371413	0.192721	0.40513	1.39594	5	0.0374333	0.193477	-0.0351345	0.959561	5	0.04747	0.217876	0.108083	1.22822	5	0.0451113	0.212394	0.0607023	1.15266	5	1.04772	1.09761	0.748824
0.509398	0.513909	-0.0419467	0.0294694	NaN	NaN	0.774127	0.340793	-0.253438	-0.177972			+									3.82e-32	220.87	2845200000	1	220.87	0.42126	0.0371413	0.192721	0.278722	1.26953	5	0.0374333	0.193477	-0.156555	0.838141	5	0.04747	0.217876	-0.813506	0.30663	5	0.0451113	0.212394	-0.723949	0.368005	5	0.115299	1.5794	0.930283
0.509195	1.9369	0.582477	2.07768	NaN	NaN	0.528977	0.0985674	1.47427	0.941352			+		++	+	+	+				9.36e-35	212.24	708830000	1	123.51	-0.68154	0.0371413	0.192721	0.0335726	1.02438	5	0.0374333	0.193477	-0.398781	0.595915	5	0.04747	0.217876	0.914199	2.03434	5	0.0451113	0.212394	0.395375	1.48733	5	0.508531	0.906428	0.55246
0.507912	1.1816	-0.0414684	0.124988	NaN	NaN	0.571453	0.141775	-0.176028	-0.101514			+									1.35e-49	233.47	202820000	1	233.47	-0.30765	0.0371413	0.192721	0.0760485	1.06686	5	0.0374333	0.193477	-0.355573	0.639123	5	0.04747	0.217876	-0.736096	0.384041	5	0.0451113	0.212394	-0.64749	0.444463	5	0.278296	0.326461	0.573991
0.504606	1.26279	-0.0683876	0.0863328	NaN	NaN	0.586579	0.147113	0.18016	0.166872			+									1.96e-16	192.32	4745300000	1	100.58	0.31005	0.0371413	0.192721	0.0911745	1.08198	5	0.0460981	0.214705	-0.449003	0.743229	4	0.04747	0.217876	-0.379908	0.740229	5	0.0557777	0.236173	-0.48885	0.822593	4	0.0495161	0.352267	0.836194
0.496474	0.508934	0.025831	0.0120776	NaN	NaN	2.96442	2.51882	3.89227	3.87643			+	+			+	+				1.5e-35	221.27	1018400000	1	221.27	-0.52873	0.0371413	0.192721	2.46902	3.45983	5	0.0374333	0.193477	2.02147	3.01617	5	0.04747	0.217876	3.3322	4.45234	5	0.0451113	0.212394	3.33046	4.42241	5	3.25962	3.24523	3.112
0.492094	0.868804	-0.0344171	0.0486197	NaN	NaN	2.71047	2.19067	4.59764	4.66056			+	+			+	+				7.4e-17	204.36	3346600000	1	126.82	0.10919	0.0371413	0.192721	2.21507	3.20588	5	0.0460981	0.214705	1.59456	2.78679	4	0.04747	0.217876	4.03758	5.15771	5	0.0557776	0.236173	4.00484	5.31628	4	3.21542	3.03312	2.77759
0.48959	0.975881	0.541888	1.87138	NaN	NaN	0.883467	0.570072	1.11547	0.724484			+				+	+				3.46e-30	216.84	127190000	1	171.32	-0.94044	0.0371413	0.192721	0.388063	1.37887	5	0.0460981	0.214705	-0.0260433	1.16619	4	0.04747	0.217876	0.555398	1.67553	5	0.0557776	0.236173	0.0687628	1.38021	4	1.34334	1.05012	0.961075
0.488412	0.547616	0.180973	0.148557	NaN	NaN	0.940646	0.525187	0.371651	0.237134			+	+								6.66e-05	145.13	2531100000	1	128.93	0.0012138	0.0371413	0.192721	0.445242	1.43605	5	0.0374333	0.193477	0.0278391	1.02253	5	0.058782	0.24245	-0.301498	1.0448	4	0.0451113	0.212394	-0.308843	0.78311	5	0.916827	0.749411	2.21804
0.488392	2.29243	0.381461	1.20845	NaN	NaN	0.617887	0.206045	0.520549	0.186022			+									6.3e-07	153.24	309020000	1	153.24	0.16741	0.0371413	0.192721	0.122482	1.11329	5	0.0374333	0.193477	-0.291303	0.703393	5	0.04747	0.217876	-0.0395199	1.08062	5	0.0451113	0.212394	-0.359955	0.731998	5	0.878959	0.764356	1.00369
0.48407	2.17009	0.199055	1.07287	NaN	NaN	1.30706	0.8916	1.96353	1.79429			+	+			+	+				0	457.47	3824600000	1	306.19	-0.3094	0.0371413	0.192721	0.811658	1.80247	5	0.0374333	0.193477	0.394252	1.38895	5	0.04747	0.217876	1.40346	2.5236	5	0.0451113	0.212394	1.24832	2.34027	5	1.62778	1.4808	1.27584
0.481454	0.569286	0.170186	0.107825	NaN	NaN	0.53484	0.130447	-0.169081	-0.297089			+									2.52e-61	229.24	2830100000	1	117.49	0.22851	0.0371413	0.192721	0.0394356	1.03024	5	0.0374333	0.193477	-0.3669	0.627795	5	0.04747	0.217876	-0.729149	0.390988	5	0.0451113	0.212394	-0.843066	0.248887	5	0.542216	0.273723	0.744078
0.481137	0.593387	-0.331386	0.589372	NaN	NaN	3.32908	2.89382	3.65265	3.98008			+	+			+	+				3.49e-08	147.26	1981200000	1	117.79	0.13473	0.0371413	0.192721	2.83367	3.82448	5	0.0374333	0.193477	2.39648	3.39117	5	0.04747	0.217876	3.09259	4.21272	5	0.0451113	0.212394	3.4341	4.52606	5	3.38003	3.78757	3.26908
0.479245	0.815124	0.693413	3.43952	NaN	NaN	0.819567	0.414077	1.36954	0.731168			+		++	+	+	+				4.96e-30	207.21	649210000	1	94.639	-0.14735	0.0371413	0.192721	0.324162	1.31497	5	0.0374333	0.193477	-0.0832714	0.911425	5	0.04747	0.217876	0.809473	1.92961	5	0.0451113	0.212394	0.185191	1.27714	5	1.22557	1.53694	0.99957
0.472632	0.886772	0.406063	0.903539	NaN	NaN	0.975443	0.574433	2.12757	1.75925			+	+			+	+				5.65e-15	167.37	1736500000	1	146.59	1.1067	0.0371413	0.192721	0.480038	1.47085	5	0.0374333	0.193477	0.0770847	1.07178	5	0.04747	0.217876	1.5675	2.68764	5	0.0451113	0.212394	1.21327	2.30523	5	1.16971	1.19673	0.683715
0.471695	0.814723	-0.184679	0.544366	NaN	NaN	0.70535	0.308233	0.219214	0.428208			+									5.14e-05	128	3775400000	1	71.03	0.64046	0.0371413	0.192721	0.209946	1.20075	5	0.0374333	0.193477	-0.189115	0.80558	5	0.04747	0.217876	-0.340854	0.779283	5	0.0451113	0.212394	-0.117769	0.974184	5	0.816572	1.3677	0.767688
0.469283	0.660425	0.204068	0.288746	NaN	NaN	1.60747	1.20256	2.5357	2.35802			+	+			+	+				4.56e-43	236.69	866240000	1	199.68	-0.022891	0.0371413	0.192721	1.11206	2.10287	5	0.0374333	0.193477	0.705209	1.6999	5	0.04747	0.217876	1.97564	3.09577	5	0.0451113	0.212394	1.81204	2.90399	5	1.3605	1.97908	1.86124
0.468485	1.50408	0.206826	0.557205	NaN	NaN	0.549332	0.0699386	0.569468	0.290957			+				+					7.44e-35	191.92	577750000	1	180.13	0.52822	0.0371413	0.192721	0.0539273	1.04474	5	0.0460981	0.214705	-0.526177	0.666054	4	0.04747	0.217876	0.00939952	1.12954	5	0.0557777	0.236173	-0.364764	0.946678	4	1.07878	0.608526	0.703737
0.462525	0.449881	-0.313725	0.925957	NaN	NaN	0.836329	0.599985	1.18281	1.64782			+	+			+	+				0	460.97	6177300000	1	243.37	0.007324	0.0371413	0.192721	0.340925	1.33173	5	0.0460981	0.214705	0.00386944	1.1961	4	0.04747	0.217876	0.622743	1.74288	5	0.0557776	0.236173	0.992098	2.30354	4	1.12582	0.205521	1.29211
0.462389	0.82004	0.714322	1.58479	NaN	NaN	1.92835	1.72766	2.17043	1.62666			+	+			+	+				5.2e-25	178.53	249860000	1	59.35	-0.003991	0.0458584	0.214146	1.33379	2.52292	4	0.0460981	0.214705	1.13154	2.32377	4	0.058782	0.24245	1.49728	2.84358	4	0.0557777	0.236173	0.970936	2.28238	4	2.13159	NaN	2.37303
0.461428	0.351661	0.152706	0.140206	NaN	NaN	0.635557	0.248871	0.0406627	-0.0719625			+									3.22e-180	352.06	334890000	1	352.06	0.58174	0.0371413	0.192721	0.140153	1.13096	5	0.0374333	0.193477	-0.248477	0.746219	5	0.04747	0.217876	-0.519406	0.600731	5	0.0451113	0.212394	-0.617939	0.474014	5	0.383783	0.197766	-0.35786
0.461413	0.519746	0.637941	0.641335	NaN	NaN	0.821283	0.43254	1.20698	0.62271			+				+	+				5.07e-07	142.76	398230000	1	140.63	-0.5987	0.0371413	0.192721	0.325878	1.31669	5	0.0374333	0.193477	-0.0648079	0.929888	5	0.04747	0.217876	0.646911	1.76705	5	0.0451113	0.212394	0.0767339	1.16869	5	0.835703	0.207525	1.45134
0.45931	0.264398	0.23508	0.465721	NaN	NaN	0.797482	0.53378	0.1494	0.0772531			+									1.6e-160	349.91	1600900000	1	349.91	0.40944	0.0371413	0.192721	0.302078	1.29289	5	0.0460981	0.214705	-0.0623355	1.1299	4	0.04747	0.217876	-0.410669	0.709468	5	0.0557777	0.236173	-0.578468	0.732974	4	2.84464	0.849619	0.247003
0.458099	0.813441	0.340061	0.226835	NaN	NaN	5.18882	4.62809	5.44882	4.80419			+	+			+	+				2.49e-13	153.41	6575400000	1	153.41	-0.71025	0.0371413	0.192721	4.69342	5.68423	5	0.0599863	0.244921	3.84864	5.40754	3	0.04747	0.217876	4.88875	6.00889	5	0.0730558	0.270288	3.94401	5.66437	3	5.26578	5.45562	6.11345
0.455769	0.973698	-0.078945	0.0867692	NaN	NaN	1.6254	1.30162	2.15474	2.61375			+				+					1.12e-12	158.86	39358000	1	158.86	-1.1254	0.0599259	0.244798	0.846345	2.40446	3	0.150995	0.388581	-3.63577	6.23902	1	0.077179	0.277811	1.27062	3.03886	3	0.192129	0.438326	-2.95571	8.1832	1	1.7566	NaN	NaN
0.455008	1.15246	0.266369	0.440194	NaN	NaN	1.73352	1.34063	2.92758	2.68779			+	+			+	+				2.46e-79	283.88	2768300000	1	283.88	-0.30785	0.0371413	0.192721	1.23811	2.22892	5	0.0374333	0.193477	0.843277	1.83797	5	0.04747	0.217876	2.36751	3.48765	5	0.0451113	0.212394	2.14181	3.23377	5	1.50323	2.02059	2.16662
0.446763	1.93182	0.183975	0.560838	NaN	NaN	1.80817	1.4222	1.87731	1.72305			+	+			+	+				1.23e-77	280.97	510720000	1	268.9	-0.82861	0.0371413	0.192721	1.31277	2.30358	5	0.0374333	0.193477	0.924851	1.91955	5	0.04747	0.217876	1.31724	2.43738	5	0.0451113	0.212394	1.17707	2.26902	5	2.19177	1.79549	2.02416
0.44576	1.89005	0.267376	1.23477	NaN	NaN	0.76008	0.386737	1.67037	1.43765			+				+	+				1.17e-28	201.65	665970000	1	154.48	-0.3082	0.0371413	0.192721	0.264676	1.25548	5	0.0374333	0.193477	-0.110611	0.884085	5	0.04747	0.217876	1.1103	2.23044	5	0.0451113	0.212394	0.891669	1.98362	5	1.08742	0.596623	1.00906
0.442346	0.504079	0.848039	0.998048	NaN	NaN	1.39916	1.0219	0.768155	-0.0143034			+	+			+					3.57e-152	353	327510000	1	353	-0.84976	0.0371413	0.192721	0.903751	1.89456	5	0.0374333	0.193477	0.524549	1.51924	5	0.04747	0.217876	0.208086	1.32822	5	0.0451113	0.212394	-0.56028	0.531673	5	1.06593	2.29537	2.34103
0.440752	0.629336	-2.82271	3.73222	NaN	NaN	2.91693	2.68585	0.295294	2.70375			+			+						7.76e-09	140.01	93732000	1	140.01	1.1036	0.0599259	0.244798	2.13788	3.69599	3	0.150996	0.388582	-2.25155	7.62324	1	0.077179	0.277811	-0.588825	1.17941	3	0.19213	0.438326	-2.86571	8.27321	1	2.91403	NaN	NaN
0.439707	1.22869	0.0988626	0.140859	NaN	NaN	1.71589	1.33758	2.93166	2.85209			+	+			+	+				1.44e-32	193.88	1791100000	1	174.68	-0.86233	0.0371413	0.192721	1.22049	2.2113	5	0.0374333	0.193477	0.840233	1.83493	5	0.04747	0.217876	2.37159	3.49173	5	0.0451113	0.212394	2.30611	3.39807	5	1.4759	2.02549	2.1255
0.437637	0.309199	0.037605	0.0185917	NaN	NaN	1.7225	1.34607	3.61047	3.58517			+	+			+	+				2.6e-26	196.38	308220000	1	196.38	-0.20531	0.0371413	0.192721	1.2271	2.21791	5	0.0374333	0.193477	0.848718	1.84341	5	0.04747	0.217876	3.0504	4.17054	5	0.0451113	0.212394	3.03919	4.13115	5	3.4805	1.92535	0.557042
0.434257	1.15043	0.2678	0.709505	NaN	NaN	0.835997	0.472623	2.34546	2.10802			+				+	+				9.43e-36	221.27	383760000	1	104.45	-0.35401	0.0371413	0.192721	0.340593	1.3314	5	0.0374333	0.193477	-0.024725	0.969971	5	0.04747	0.217876	1.78539	2.90553	5	0.0451113	0.212394	1.56204	2.654	5	1.13543	0.575867	1.10564
0.432657	0.95121	0.299168	0.582532	NaN	NaN	1.67794	1.113	1.67131	1.4967			+				+					3.77e-06	107.97	37907000	1	107.97	0.13398	0.0599259	0.244798	0.898883	2.45699	3	0.150995	0.388581	-3.8244	6.05039	1	0.0771789	0.277811	0.787196	2.55543	3	0.192129	0.438326	-4.07276	7.06615	1	1.91158	1.45983	2.37939
0.432306	1.1821	0.0566594	0.220976	NaN	NaN	1.79869	1.42642	2.69565	2.65796			+	+			+	+				0	569.12	3147200000	1	281.76	-0.22837	0.0371413	0.192721	1.30329	2.2941	5	0.0374333	0.193477	0.929069	1.92376	5	0.04747	0.217876	2.13558	3.25572	5	0.0451113	0.212394	2.11198	3.20393	5	2.12192	2.06791	2.32859
0.42571	0.739269	-0.219118	0.387308	NaN	NaN	1.42424	1.06234	0.647765	0.886969			+	+			+	+				0	473.43	1342400000	1	441.65	0.061598	0.0371413	0.192721	0.928838	1.91965	5	0.0374333	0.193477	0.564997	1.55969	5	0.04747	0.217876	0.0876963	1.20783	5	0.0451113	0.212394	0.340993	1.43295	5	1.7166	2.33627	1.82012
0.420643	0.700673	0.525554	1.57838	NaN	NaN	2.13378	1.76873	2.623	2.1372			+	+			+	+				2.19e-07	124.12	207880000	1	124.12	-0.016926	0.0371413	0.192721	1.63837	2.62918	5	0.0374333	0.193477	1.27138	2.26608	5	0.04747	0.217876	2.06293	3.18307	5	0.0451113	0.212394	1.59123	2.68318	5	3.25101	2.22127	2.14303
0.415825	2.60178	0.305874	2.18122	NaN	NaN	1.32916	0.977622	2.45261	2.17806			+	+			+	+				8.53e-56	252.44	899480000	1	56.215	3.6679	0.0371413	0.192721	0.83376	1.82457	5	0.0374333	0.193477	0.480274	1.47497	5	0.04747	0.217876	1.89254	3.01267	5	0.0451113	0.212394	1.63208	2.72403	5	1.69557	1.22941	1.64492
0.41528	0.409265	0.378933	0.285605	NaN	NaN	0.848757	0.656931	1.88953	1.5432			+				+	+				0.00186786	94.692	120290000	1	53.554	-0.0016766	0.0458584	0.214146	0.254193	1.44332	4	0.0599863	0.244921	-0.122517	1.43638	3	0.058782	0.24245	1.21639	2.56268	4	0.0730558	0.270288	0.683019	2.40338	3	-0.184046	2.08223	1.24161
0.4146	2.02596	0.611039	3.38105	NaN	NaN	0.547339	0.300877	0.962831	0.393943			+		++	+	+					1.47e-12	143.19	270670000	1	134.05	0.071137	0.0371413	0.192721	0.0519346	1.04274	5	0.0460981	0.214705	-0.295239	0.896993	4	0.04747	0.217876	0.402763	1.5229	5	0.0557776	0.236173	-0.261778	1.04966	4	0.693306	0.703434	0.555566
0.412879	1.91143	0.659758	3.57551	NaN	NaN	0.591437	0.250891	1.2348	0.629477			+		++	+	+	+				8.48e-73	272.67	1429200000	1	89.46	1.4466	0.0371413	0.192721	0.0960324	1.08684	5	0.0374333	0.193477	-0.246457	0.748239	5	0.04747	0.217876	0.674727	1.79486	5	0.0451113	0.212394	0.0835009	1.17545	5	0.591374	0.834508	0.70879
0.411862	0.566288	2.25242	3.57165	NaN	NaN	2.15853	1.67517	2.84063	0.813308			+	+	++	+	+					2.66e-75	275.42	493850000	1	275.42	-0.28607	0.0371413	0.192721	1.66312	2.65393	5	0.0858583	0.293016	0.414422	2.93591	2	0.04747	0.217876	2.28056	3.4007	5	0.105854	0.325351	-0.586566	2.21318	2	2.72309	2.43762	2.98455
0.411289	1.10153	0.309504	0.719888	NaN	NaN	0.53389	0.19548	1.02018	0.751298			+				+	+				3.26e-94	291.67	768410000	1	159.98	0.57874	0.0371413	0.192721	0.0384852	1.02929	5	0.0374333	0.193477	-0.301868	0.692828	5	0.04747	0.217876	0.460108	1.58024	5	0.0451113	0.212394	0.205321	1.29727	5	0.200702	1.02226	0.807252
0.409693	0.369583	0.113986	0.0699318	NaN	NaN	0.865113	0.539268	0.614684	0.535436			+	+			+					1.46e-05	153.1	2866100000	1	62.166	0.19153	0.0458584	0.214146	0.270549	1.45968	4	0.0374333	0.193477	0.0419197	1.03662	5	0.04747	0.217876	0.0546155	1.17475	5	0.0451113	0.212394	-0.0105401	1.08141	5	0.567691	2.53795	-0.0338164
0.408245	0.913588	0.671027	1.63395	NaN	NaN	1.03604	0.69992	1.58315	0.921197			+	+			+	+				4.66e-178	374.19	208100000	1	374.19	-0.089185	0.0371413	0.192721	0.540635	1.53144	5	0.0460981	0.214705	0.103804	1.29604	4	0.04747	0.217876	1.02308	2.14322	5	0.0557776	0.236173	0.265476	1.57692	4	1.00036	0.866762	1.49849
0.407712	0.438468	0.0572552	0.0377763	NaN	NaN	0.973117	0.633173	0.151655	0.129634			+	+								1.2e-93	285.5	863900000	1	197.14	0.86825	0.0371413	0.192721	0.477712	1.46852	5	0.0374333	0.193477	0.135825	1.13052	5	0.04747	0.217876	-0.408414	0.711723	5	0.0451113	0.212394	-0.416343	0.67561	5	1.5697	-0.282782	1.57263
0.405732	0.782185	0.401081	0.625922	NaN	NaN	1.91276	1.51734	3.42564	3.03359			+	+			+	+				1.63e-105	267.91	533420000	1	191.33	-0.23625	0.0371413	0.192721	1.41736	2.40817	5	0.0599862	0.244921	0.737888	2.29678	3	0.04747	0.217876	2.86557	3.98571	5	0.0730557	0.270288	2.17341	3.89377	3	2.81628	1.95544	2.4457
0.405295	2.20479	0.14799	0.724539	NaN	NaN	0.704351	0.369676	1.66323	1.54476			+				+	+				0	463.45	2426300000	1	371.61	-2.2788	0.0371413	0.192721	0.208947	1.19976	5	0.0374333	0.193477	-0.127672	0.867024	5	0.04747	0.217876	1.10316	2.2233	5	0.0451113	0.212394	0.998782	2.09073	5	1.11987	0.683664	0.726795
0.40485	2.17418	0.610371	2.88355	NaN	NaN	1.84949	1.50247	4.57902	3.9996			+	+	++	+	+	+				5.67e-131	318.1	1839100000	1	318.1	0.66459	0.0371413	0.192721	1.35409	2.3449	5	0.0374333	0.193477	1.00512	1.99981	5	0.04747	0.217876	4.01896	5.13909	5	0.0451113	0.212394	3.45363	4.54558	5	2.04019	2.0079	2.03717
0.404469	1.03442	-0.0104496	0.0487586	NaN	NaN	1.48629	1.14368	1.9108	1.94232			+	+			+	+				4.72e-07	161.44	6983100000	1	161.44	-0.11178	0.0371413	0.192721	0.99089	1.9817	5	0.0374333	0.193477	0.646329	1.64103	5	0.04747	0.217876	1.35073	2.47087	5	0.0451113	0.212394	1.39634	2.48829	5	2.40152	1.57154	1.4364
0.402603	0.886785	0.343587	0.831656	NaN	NaN	2.75585	2.40083	4.36918	4.04632			+	+			+	+				2.01e-78	273.49	1472400000	1	273.49	-0.63385	0.0371413	0.192721	2.26045	3.25125	5	0.0374333	0.193477	1.90348	2.89818	5	0.04747	0.217876	3.80911	4.92925	5	0.0451113	0.212394	3.50034	4.59229	5	3.1707	2.83388	3.06684
0.402269	1.2365	0.110398	0.224349	NaN	NaN	0.916619	0.582423	2.25611	2.16982			+	+			+	+				7.35e-23	192.18	337430000	1	180.48	-0.25916	0.0371413	0.192721	0.421215	1.41202	5	0.0374333	0.193477	0.0850746	1.07977	5	0.04747	0.217876	1.69605	2.81618	5	0.0451113	0.212394	1.62384	2.7158	5	0.742647	1.21781	1.24082
0.402065	0.413489	0.45326	0.592846	NaN	NaN	1.26025	1.08688	2.36311	2.25097			+				+	+				1.01e-40	211.93	97738000	1	40.994	-0.60495	0.0458584	0.214146	0.66569	1.85482	4	0.0858584	0.293016	-0.173865	2.34763	2	0.058782	0.24245	1.68996	3.03625	4	0.105854	0.325352	0.851095	3.65085	2	2.30234	0.377031	1.45244
0.399487	0.811302	0.476009	0.68684	NaN	NaN	0.939182	0.794984	1.70908	1.75014			+				+					1.22e-85	282.06	396100000	1	125.62	-1.4965	0.0371413	0.192721	0.443777	1.43459	5	0.150995	0.388581	-4.1424	5.73237	1	0.04747	0.217876	1.14901	2.26915	5	0.192129	0.438325	-3.81931	7.31959	1	0.693319	1.17517	1.45802
0.398495	1.03113	0.443898	1.02002	NaN	NaN	1.0125	0.680784	2.20428	1.79927			+	+			+	+				0	652.53	7085500000	1	253.21	-0.6523	0.0371413	0.192721	0.517098	1.50791	5	0.0374333	0.193477	0.183436	1.17813	5	0.04747	0.217876	1.64421	2.76435	5	0.0451113	0.212394	1.2533	2.34525	5	1.29105	1.02207	1.25431
0.39225	0.65558	0.0341413	0.0500988	NaN	NaN	1.14184	0.914129	2.08257	1.91637			+				+					9.67e-21	176.68	81121000	1	176.68	0.2994	0.0371413	0.192721	0.64644	1.63725	5	0.150996	0.388582	-4.02327	5.85153	1	0.04747	0.217876	1.5225	2.64264	5	0.19213	0.438326	-3.65309	7.48582	1	1.8501	0.981937	1.56678
0.39144	1.27045	0.157938	1.07271	NaN	NaN	0.886195	0.56252	1.56045	1.43312			+	+			+	+				5.57e-192	366.56	2054900000	1	261.02	-0.48546	0.0371413	0.192721	0.390791	1.3816	5	0.0374333	0.193477	0.065172	1.05987	5	0.04747	0.217876	1.00038	2.12052	5	0.0451113	0.212394	0.887143	1.9791	5	0.936384	1.66285	0.876232
0.38922	0.591181	0.242885	0.34775	NaN	NaN	1.27481	0.948884	1.68066	1.4713			+	+			+	+				5.45e-79	275.79	3311000000	1	259.32	-0.016274	0.0371413	0.192721	0.779401	1.77021	5	0.0374333	0.193477	0.451536	1.44623	5	0.04747	0.217876	1.1206	2.24073	5	0.0451113	0.212394	0.925325	2.01728	5	1.33328	0.967542	1.36891
0.388137	1.06663	0.753845	1.8792	NaN	NaN	1.22974	0.921454	2.14449	1.45733			+	+	++	+	+	+				3.53e-118	304.92	128610000	1	304.92	-0.61664	0.0458584	0.214146	0.635179	1.82431	4	0.0374333	0.193477	0.424106	1.4188	5	0.058782	0.24245	1.47134	2.81764	4	0.0451113	0.212394	0.911353	2.00331	5	1.07977	NaN	1.60668
0.388137	1.06663	0.753845	1.8792	NaN	NaN	1.22974	0.921454	2.14449	1.45733			+	+	++	+	+	+				3.53e-118	304.92	128610000	1	304.92	-0.61664	0.0458584	0.214146	0.635179	1.82431	4	0.0374333	0.193477	0.424106	1.4188	5	0.058782	0.24245	1.47134	2.81764	4	0.0451113	0.212394	0.911353	2.00331	5	1.07977	NaN	1.60668
0.386244	1.16795	-0.103768	0.304935	NaN	NaN	0.503371	0.18885	-0.209505	-0.0751784			+									1.21e-27	206.55	508750000	1	206.55	-2.4321	0.0371413	0.192721	0.00796708	0.998776	5	0.0374333	0.193477	-0.308498	0.686198	5	0.04747	0.217876	-0.769574	0.350563	5	0.0451113	0.212394	-0.621155	0.470798	5	0.561403	0.266899	0.628955
0.384828	0.710282	0.637814	0.904046	NaN	NaN	0.508756	0.195506	0.901472	0.319275			+				+					1.21e-38	183.69	1130500000	1	74.376	0.41658	0.0371413	0.192721	0.0133517	1.00416	5	0.0374333	0.193477	-0.301842	0.692854	5	0.04747	0.217876	0.341404	1.46154	5	0.0451113	0.212394	-0.226702	0.865251	5	0.8046	0.86578	-0.0581765
0.382313	0.822245	0.105933	0.209001	NaN	NaN	0.558748	0.385718	0.425532	0.434744			+									3.99e-10	141.75	530580000	1	141.75	-0.24843	0.0371413	0.192721	0.0633434	1.05415	5	0.0460981	0.214705	-0.210398	0.981833	4	0.04747	0.217876	-0.134536	0.985601	5	0.0557776	0.236173	-0.220977	1.09047	4	0.847555	0.369565	0.566813
0.382041	1.70317	-0.121636	0.441947	NaN	NaN	0.665924	0.353541	1.10976	1.25276			+				+	+				0.000708294	111.46	360920000	1	72.643	-2.3282	0.0371413	0.192721	0.170519	1.16133	5	0.0374333	0.193477	-0.143807	0.850889	5	0.04747	0.217876	0.549692	1.66983	5	0.0451113	0.212394	0.706784	1.79874	5	0.660255	0.827562	0.784048
0.381729	1.94977	-0.087482	0.151501	NaN	NaN	1.47609	1.15496	2.40793	2.50997			+	+			+	+				1.66e-60	202.49	3528300000	1	157.56	0.029146	0.0371413	0.192721	0.980683	1.97149	5	0.0374333	0.193477	0.657617	1.65231	5	0.04747	0.217876	1.84786	2.968	5	0.0451113	0.212394	1.96399	3.05595	5	1.66595	1.5632	1.65075
0.380148	0.235258	0.230534	0.121825	NaN	NaN	2.82269	2.48804	4.06914	3.85635			+	+			+	+				0	490.05	3255200000	1	289.35	-0.11522	0.0371413	0.192721	2.32728	3.31809	5	0.0374333	0.193477	1.99069	2.98538	5	0.04747	0.217876	3.50908	4.62921	5	0.0451113	0.212394	3.31037	4.40233	5	3.82974	1.95932	3.48382
0.379438	0.394548	0.414049	0.650415	NaN	NaN	1.77315	1.45087	1.81112	1.43718			+	+			+	+				1.28e-05	115.91	4003100000	1	96.604	0.32069	0.0371413	0.192721	1.27775	2.26856	5	0.0374333	0.193477	0.953526	1.94822	5	0.04747	0.217876	1.25105	2.37118	5	0.0451113	0.212394	0.891199	1.98315	5	1.84731	1.53946	1.82139
0.373545	1.20204	0.265487	0.746786	NaN	NaN	1.79436	1.47738	2.39342	2.15788			+	+			+	+				3.23e-256	414.51	7927800000	1	365.06	0.34706	0.0371413	0.192721	1.29896	2.28977	5	0.0374333	0.193477	0.980036	1.97473	5	0.04747	0.217876	1.83335	2.95348	5	0.0451113	0.212394	1.6119	2.70386	5	2.34368	1.79285	1.99183
0.373294	0.125605	-0.312499	0.0948311	NaN	NaN	4.75668	4.4069	1.22549	1.55034			+	+			+	+				2.01e-36	212.35	409580000	1	212.35	0.85406	0.0371413	0.192721	4.26127	5.25208	5	0.0374333	0.193477	3.90956	4.90425	5	0.04747	0.217876	0.665425	1.78556	5	0.0451113	0.212394	1.00437	2.09632	5	3.13017	5.74293	6.36901
0.37262	0.762546	0.843822	1.58939	NaN	NaN	0.624549	0.378933	1.21295	0.45962			+				+					7.87e-74	238.65	186290000	1	238.65	-0.08866	0.0458584	0.214146	0.0299848	1.21911	4	0.0599861	0.244921	-0.400513	1.15838	3	0.058782	0.24245	0.539797	1.8861	4	0.0730556	0.270288	-0.400557	1.3198	3	0.783235	NaN	0.579478
0.371211	0.625225	-0.161073	0.276297	NaN	NaN	1.93425	1.6179	2.57718	2.74854			+	+			+	+				2.72e-05	115.39	2448800000	1	110.08	-0.114	0.0371413	0.192721	1.43884	2.42965	5	0.0374333	0.193477	1.12056	2.11525	5	0.04747	0.217876	2.01712	3.13725	5	0.0451113	0.212394	2.20257	3.29452	5	1.84875	2.48766	1.89937
0.369162	1.84344	-0.32601	0.613067	NaN	NaN	0.638597	0.33863	-0.332442	0.0152765			+									4.43e-95	293.35	16414000000	1	86.182	-0.30145	0.0371413	0.192721	0.143193	1.134	5	0.0374333	0.193477	-0.158718	0.835978	5	0.04747	0.217876	-0.892511	0.227626	5	0.0451113	0.212394	-0.5307	0.561253	5	0.753507	0.409043	0.697713
0.368073	1.0841	0.255573	0.317836	NaN	NaN	1.70368	1.39286	2.51219	2.28538			+	+			+	+				8.51e-191	351.59	1946400000	1	270.81	-0.3342	0.0371413	0.192721	1.20828	2.19909	5	0.0374333	0.193477	0.895516	1.89021	5	0.04747	0.217876	1.95212	3.07226	5	0.0451113	0.212394	1.7394	2.83135	5	2.06164	2.06079	2.20181
0.367411	1.7393	0.194078	0.874441	NaN	NaN	0.528134	0.231044	0.984905	0.826675			+				+	+				3.12e-09	154	1347700000	1	152.07	-0.25325	0.0371413	0.192721	0.0327298	1.02354	5	0.0374333	0.193477	-0.266304	0.728392	5	0.04747	0.217876	0.424837	1.54497	5	0.0451113	0.212394	0.280698	1.37265	5	0.655102	0.672818	0.796666
0.367116	1.17948	0.134212	0.220708	NaN	NaN	0.701587	0.40284	1.86453	1.75795			+				+	+				4.85e-61	252.43	295330000	1	252.43	-0.97626	0.0371413	0.192721	0.206182	1.19699	5	0.0374333	0.193477	-0.0945076	0.900188	5	0.04747	0.217876	1.30446	2.4246	5	0.0451113	0.212394	1.21198	2.30393	5	1.01358	0.92947	0.889741
0.36593	0.19266	0.0423402	0.0487659	NaN	NaN	0.836738	0.5376	0.781855	0.77008			+	+			+	+				2.48e-234	412.49	1522300000	1	127.25	1.3041	0.0371413	0.192721	0.341334	1.33214	5	0.0374333	0.193477	0.0402517	1.03495	5	0.04747	0.217876	0.221787	1.34192	5	0.0451113	0.212394	0.224103	1.31606	5	1.54468	0.141655	1.71846
0.364475	1.45476	-0.169043	0.411115	NaN	NaN	1.99625	1.68555	2.65987	2.83833			+	+			+	+				4.85e-14	177.78	3346300000	1	160.53	-0.58865	0.0371413	0.192721	1.50085	2.49166	5	0.0374333	0.193477	1.1882	2.1829	5	0.04747	0.217876	2.0998	3.21994	5	0.0451113	0.212394	2.29235	3.38431	5	2.49382	2.09383	2.1958
0.364387	1.76303	0.503416	2.34686	NaN	NaN	0.564038	0.269391	1.08422	0.629428			+		++	+	+	+				0	452.04	2003400000	1	131.04	-0.15265	0.0371413	0.192721	0.0686332	1.05944	5	0.0374333	0.193477	-0.227957	0.766739	5	0.04747	0.217876	0.524152	1.64429	5	0.0451113	0.212394	0.0834514	1.1754	5	0.596669	0.659878	0.89148
0.363905	0.568358	0.598172	2.12847	NaN	NaN	0.561455	0.26729	2.14233	1.59014			+		++	+	+	+				7.93e-76	283.34	610080000	1	196.33	-0.052458	0.0371413	0.192721	0.0660503	1.05686	5	0.0374333	0.193477	-0.230058	0.764638	5	0.04747	0.217876	1.58226	2.7024	5	0.0451113	0.212394	1.04416	2.13611	5	1.15263	0.696067	1.45215
0.362213	1.86263	0.217762	1.01616	NaN	NaN	0.955041	0.658078	2.39662	2.20672			+	+			+	+				4.19e-31	206.8	21991000000	1	81.278	-0.2457	0.0371413	0.192721	0.459637	1.45045	5	0.0374333	0.193477	0.16073	1.15543	5	0.04747	0.217876	1.83655	2.95668	5	0.0451113	0.212394	1.66074	2.75269	5	1.41764	1.00185	1.2324
0.359636	1.18173	-0.0393004	0.137599	NaN	NaN	1.97709	1.67116	2.92536	2.97801			+	+			+	+				1.49e-110	320.45	25296000000	1	130.66	0.095082	0.0371413	0.192721	1.48169	2.4725	5	0.0374333	0.193477	1.17381	2.1685	5	0.04747	0.217876	2.3653	3.48543	5	0.0451113	0.212394	2.43203	3.52398	5	2.48897	1.77612	2.10006
0.359118	1.01577	0.197831	0.577283	NaN	NaN	1.91679	1.72285	2.46188	2.38757			+	+			+	+				3.29e-167	351.81	3300300000	1	313.93	-0.32298	0.0371413	0.192721	1.42139	2.4122	5	0.0460981	0.214705	1.12674	2.31897	4	0.04747	0.217876	1.90181	3.02195	5	0.0557776	0.236173	1.73185	3.04329	4	2.23159	2.38249	1.97557
0.358479	0.445055	-0.121996	0.328006	NaN	NaN	1.13827	0.880127	0.964204	1.14266			+	+			+	+				0.00044793	76.728	135870000	1	76.728	0.077552	0.0599259	0.244798	0.359219	1.91733	3	0.0374333	0.193477	0.38278	1.37748	5	0.0771789	0.277811	0.0800853	1.84832	3	0.0451113	0.212394	0.596679	1.68863	5	1.60674	1.10801	NaN
0.356793	1.76191	0.267225	0.7458	NaN	NaN	0.889839	0.598699	1.2346	1.0048			+	+			+	+				2.68e-95	294.05	1475400000	1	276.8	0.14796	0.0371413	0.192721	0.394434	1.38524	5	0.0374333	0.193477	0.101351	1.09605	5	0.04747	0.217876	0.674528	1.79466	5	0.0451113	0.212394	0.458819	1.55077	5	1.25661	0.784944	1.24028
0.356106	1.75859	0.0939661	0.57012	NaN	NaN	0.695059	0.406737	1.34448	1.27972			+				+	+				0.000146701	125.72	1764300000	1	123.01	-0.14946	0.0371413	0.192721	0.199655	1.19046	5	0.0374333	0.193477	-0.0906111	0.904085	5	0.04747	0.217876	0.784408	1.90455	5	0.0451113	0.212394	0.733746	1.8257	5	0.849174	1.02097	0.705107
0.355515	0.763487	0.177041	0.753703	NaN	NaN	0.498829	0.213251	1.10381	0.96112			+				+	+				2.57e-12	160.18	518770000	1	145.6	0.74636	0.0371413	0.192721	0.00342509	0.994234	5	0.0374333	0.193477	-0.284097	0.710599	5	0.04747	0.217876	0.543743	1.66388	5	0.0451113	0.212394	0.415143	1.5071	5	0.40298	0.0687624	1.11868
0.35362	0.613098	0.468963	1.64336	NaN	NaN	1.46315	1.11564	1.47253	1.13501			+	+			+	+				5.14e-141	310.75	199780000	1	310.75	0.0069359	0.0371413	0.192721	0.967743	1.95855	5	0.0460982	0.214705	0.51952	1.71175	4	0.058782	0.24245	0.799377	2.14568	4	0.0557778	0.236173	0.479288	1.79073	4	1.81984	0.790369	1.80814
0.352662	0.777932	0.422738	0.412713	NaN	NaN	1.35428	1.18674	1.12043	1.29922			+				+					3.43e-167	352.36	105770000	1	210.32	0.01683	0.0371413	0.192721	0.85888	1.84969	5	0.150995	0.388581	-3.75065	6.12412	1	0.04747	0.217876	0.560359	1.6805	5	0.192129	0.438325	-4.27023	6.86866	1	1.69711	1.4406	1.46054
0.345553	1.08023	0.109928	0.151727	NaN	NaN	2.27813	1.98208	2.88229	2.79245			+	+			+	+				2.38e-36	218.94	349730000	1	218.94	-0.50259	0.0371413	0.192721	1.78273	2.77354	5	0.0374333	0.193477	1.48473	2.47943	5	0.04747	0.217876	2.32222	3.44236	5	0.0451113	0.212394	2.24647	3.33843	5	2.79304	2.76	2.34723
0.343185	1.56206	0.329107	1.81525	NaN	NaN	2.27631	1.9825	2.40379	2.10733			+	+			+	+				1.73e-29	201.75	702110000	1	192.96	0.31155	0.0371413	0.192721	1.7809	2.77171	5	0.0374333	0.193477	1.48515	2.47985	5	0.04747	0.217876	1.84372	2.96386	5	0.0451113	0.212394	1.56135	2.6533	5	2.8267	2.5057	2.52198
0.342925	1.00831	-0.0727368	0.281127	NaN	NaN	0.943864	0.665161	1.1115	1.20771			+	+			+	+				1.28e-22	213.45	11451000000	1	148.94	0.052804	0.0371413	0.192721	0.448459	1.43927	5	0.0374333	0.193477	0.167813	1.16251	5	0.04747	0.217876	0.551432	1.67157	5	0.0451113	0.212394	0.661733	1.75369	5	1.22064	1.3067	1.3365
0.341022	0.694665	0.310387	0.712813	NaN	NaN	1.23212	0.951992	1.74727	1.47291			+	+			+	+				0.000810468	111.27	185860000	1	111.27	-0.33043	0.0371413	0.192721	0.736715	1.72752	5	0.0374333	0.193477	0.454644	1.44934	5	0.04747	0.217876	1.1872	2.30734	5	0.0451113	0.212394	0.926932	2.01889	5	1.53484	1.49445	1.36267
0.341018	2.59671	0.00660891	0.0335661	NaN	NaN	0.932906	0.656118	1.95245	1.96738			+	+			+	+				1.42e-81	274.52	571110000	1	248.13	1.0467	0.0371413	0.192721	0.437502	1.42831	5	0.0374333	0.193477	0.15877	1.15347	5	0.04747	0.217876	1.39238	2.51252	5	0.0451113	0.212394	1.42141	2.51336	5	1.08139	1.07119	1.0157
0.340858	0.247339	0.101243	0.171993	NaN	NaN	0.766011	0.540734	-0.180334	-0.114162			+									6.21e-115	312.39	220420000	1	312.39	-2.4964	0.0458584	0.214146	0.171447	1.36058	4	0.085858	0.293015	-0.720009	1.80148	2	0.058782	0.24245	-0.853483	0.492815	4	0.105853	0.325351	-1.51403	1.28571	2	1.05896	0.394672	2.43562
0.340677	0.41266	0.564285	0.678755	NaN	NaN	0.699297	0.431751	1.51321	1.25253			+				+	+				6.72e-106	278.06	203030000	1	278.06	-0.15579	0.0371413	0.192721	0.203893	1.1947	5	0.0599862	0.244921	-0.347696	1.2112	3	0.04747	0.217876	0.953145	2.07328	5	0.0730556	0.270288	0.392358	2.11271	3	0.818378	1.306	1.09192
0.339459	1.63615	0.129182	0.795181	NaN	NaN	1.52201	1.24012	1.9387	1.83646			+	+			+	+				5.81e-51	236.95	1241000000	1	233.31	0.16113	0.0371413	0.192721	1.0266	2.01741	5	0.0374333	0.193477	0.74277	1.73747	5	0.04747	0.217876	1.37863	2.49877	5	0.0451113	0.212394	1.29049	2.38244	5	1.78497	1.58124	1.97875
0.338505	1.15422	0.382761	1.60762	NaN	NaN	0.651922	0.38063	0.89953	0.561341			+				+	+				1.62e-107	289.96	740320000	1	165.39	0.71416	0.0371413	0.192721	0.156517	1.14733	5	0.0374333	0.193477	-0.116718	0.877978	5	0.04747	0.217876	0.339462	1.4596	5	0.0451113	0.212394	0.0153643	1.10732	5	0.572267	0.453295	0.735544
0.337997	0.298312	0.123343	0.145824	NaN	NaN	0.620171	0.349711	0.331029	0.255684			+									3.1e-21	188.48	2118700000	1	136.27	0.39049	0.0371413	0.192721	0.124767	1.11558	5	0.0374333	0.193477	-0.147637	0.847059	5	0.0587819	0.24245	-0.34212	1.00418	4	0.0451113	0.212394	-0.290293	0.80166	5	0.316439	0.139817	0.217686
0.337994	2.10214	0.220708	3.94452	NaN	NaN	0.612174	0.341807	1.07571	0.891424			+				+	+				8.69e-78	277.87	1110500000	1	95.954	-0.15703	0.0371413	0.192721	0.11677	1.10758	5	0.0374333	0.193477	-0.155541	0.839154	5	0.04747	0.217876	0.515642	1.63578	5	0.0451113	0.212394	0.345448	1.4374	5	0.774167	0.671243	1.02652
0.334626	0.875565	-0.378497	0.629185	NaN	NaN	1.12064	0.847772	1.40081	1.78767			+	+			+	+				6.48e-158	342.31	1191200000	1	338.5	-0.39052	0.0371413	0.192721	0.625238	1.61605	5	0.0374333	0.193477	0.350424	1.34512	5	0.04747	0.217876	0.840737	1.96087	5	0.0451113	0.212394	1.2417	2.33365	5	1.2601	1.42599	1.17528
0.334366	0.334846	-0.213484	0.387139	NaN	NaN	1.20463	0.931072	0.765291	0.998355			+	+			+	+				2.98e-168	355.57	2512500000	1	248.35	-0.557	0.0371413	0.192721	0.70923	1.70004	5	0.0374333	0.193477	0.433724	1.42842	5	0.04747	0.217876	0.205222	1.32536	5	0.0451113	0.212394	0.452378	1.54433	5	1.32287	0.82772	0.837366
0.333613	0.629983	0.19226	0.526121	NaN	NaN	0.780114	0.511992	1.3957	1.23659			+	+			+	+				0	469.28	2067000000	1	126.19	-0.52189	0.0371413	0.192721	0.28471	1.27552	5	0.0374333	0.193477	0.0146441	1.00934	5	0.04747	0.217876	0.835635	1.95577	5	0.0451113	0.212394	0.690613	1.78257	5	0.67593	0.921997	1.33628
0.327233	0.444946	0.038864	0.0562306	NaN	NaN	1.2453	0.977988	2.24717	2.22937			+	+			+	+				2e-145	329.64	1363100000	1	289.68	-0.28774	0.0371413	0.192721	0.749893	1.7407	5	0.0374333	0.193477	0.48064	1.47534	5	0.04747	0.217876	1.6871	2.80724	5	0.0451113	0.212394	1.68339	2.77534	5	2.29831	1.68271	1.05291
0.325314	2.21806	-0.0748217	0.382311	NaN	NaN	1.26712	1.00137	1.8314	1.92501			+	+			+	+				6.64e-22	191.18	45320000000	1	160.81	-0.60275	0.0371413	0.192721	0.771715	1.76252	5	0.0374333	0.193477	0.504022	1.49872	5	0.04747	0.217876	1.27134	2.39147	5	0.0451113	0.212394	1.37904	2.47099	5	1.59229	1.39112	1.3792
0.325242	1.3899	0.301743	1.10793	NaN	NaN	0.629942	0.265764	1.13592	0.971845			+				+	+				1.3e-120	313.22	369610000	1	313.22	-0.2955	0.0371413	0.192721	0.134538	1.12535	5	0.0460981	0.214705	-0.330351	0.86188	4	0.04747	0.217876	0.575855	1.69599	5	0.0557777	0.236173	0.316124	1.62757	4	0.648124	0.861583	0.69882
0.323997	2.39157	0.156357	1.13672	NaN	NaN	3.26839	2.98156	3.94153	3.80051			+	+			+	+				0	622.13	4035400000	1	622.13	-0.36189	0.0371413	0.192721	2.77298	3.76379	5	0.0374333	0.193477	2.48421	3.47891	5	0.04747	0.217876	3.38146	4.5016	5	0.0451113	0.212394	3.25454	4.34649	5	3.55471	3.2836	3.737
0.320632	0.381195	0.295429	0.385207	NaN	NaN	3.16729	2.88476	3.88097	3.6073			+	+			+	+				5.79e-92	286.26	618840000	1	286.26	-0.6659	0.0371413	0.192721	2.67189	3.6627	5	0.0374333	0.193477	2.38741	3.38211	5	0.04747	0.217876	3.3209	4.44104	5	0.0451113	0.212394	3.06132	4.15328	5	4.451	3.54652	3.34827
0.320332	2.94351	0.282481	1.93707	NaN	NaN	0.534265	0.281373	1.63398	1.38703			+				+	+				1.97e-135	326.14	41875000000	1	246.49	0.037257	0.0371413	0.192721	0.038861	1.02967	5	0.0374333	0.193477	-0.215975	0.778721	5	0.04747	0.217876	1.07391	2.19404	5	0.0451113	0.212394	0.841054	1.93301	5	0.675029	0.740099	0.704817
0.317417	0.930966	-0.375314	1.04748	NaN	NaN	0.67956	0.243873	0.216556	0.240487			+									0.00318433	68.171	82327000	1	60.893	2.7033	0.0458584	0.214146	0.0849965	1.27412	4	0.085858	0.293015	-1.01687	1.50462	2	0.058782	0.24245	-0.456593	0.889705	4	0.105853	0.325351	-1.15939	1.64036	2	1.03781	0.880577	0.70403
0.315953	0.454217	-0.255417	0.421471	NaN	NaN	2.51607	2.24519	4.04863	4.30085			+	+			+	+				4.12e-30	210.31	4132600000	1	195.94	1.2259	0.0371413	0.192721	2.02066	3.01147	5	0.0374333	0.193477	1.74785	2.74254	5	0.04747	0.217876	3.48856	4.6087	5	0.0451113	0.212394	3.75487	4.84683	5	3.38456	2.19171	2.76236
0.315015	1.12664	-1.07897	1.16492	NaN	NaN	1.06193	0.808149	0.0809774	1.14638			+	+				+				0.00100832	116.73	1391500000	1	76.1	-0.18252	0.0371413	0.192721	0.566522	1.55733	5	0.0374333	0.193477	0.310801	1.3055	5	0.04747	0.217876	-0.479091	0.641046	5	0.0451113	0.212394	0.600399	1.69235	5	1.36506	0.997637	1.38208
0.314891	1.7274	0.126923	0.506389	NaN	NaN	1.15172	0.897061	1.95418	1.854			+	+			+	+				2.45e-159	357.92	1113800000	1	327.53	0.28469	0.0371413	0.192721	0.656318	1.64713	5	0.0374333	0.193477	0.399713	1.39441	5	0.04747	0.217876	1.39411	2.51425	5	0.0451113	0.212394	1.30803	2.39998	5	1.08371	1.15351	1.32903
0.313248	3.50381	0.152632	1.09607	NaN	NaN	0.530481	0.284291	0.591829	0.475756			+				+					1.48e-20	173.59	16689000000	1	67.102	-0.19669	0.0371413	0.192721	0.0350771	1.02589	5	0.0374333	0.193477	-0.213057	0.781639	5	0.04747	0.217876	0.0317602	1.1519	5	0.0451113	0.212394	-0.0702204	1.02173	5	0.66299	0.563502	0.691886
0.311491	1.34392	0.112226	0.395784	NaN	NaN	1.12895	0.877743	1.68787	1.60346			+	+			+	+				8.4e-181	361.27	16731000000	1	82.813	-3.1488	0.0371413	0.192721	0.63355	1.62436	5	0.0374333	0.193477	0.380395	1.37509	5	0.04747	0.217876	1.1278	2.24794	5	0.0451113	0.212394	1.05748	2.14943	5	1.53544	1.17709	1.24152
0.308487	0.523067	-0.216069	0.139718	NaN	NaN	0.833175	0.600567	0.176418	0.45943			+	+								0.00208748	86.744	445850000	1	85.67	1.382	0.0371413	0.192721	0.337771	1.32858	5	0.0460982	0.214705	0.00445081	1.19668	4	0.04747	0.217876	-0.383651	0.736486	5	0.0557778	0.236173	-0.196292	1.11515	4	1.01913	0.590765	1.31439
0.306975	0.834542	0.978052	0.478083	NaN	NaN	0.591661	0.350688	2.76537	1.84578			+				+	+				0	442.29	1049400000	1	258.97	-1.9024	0.0371413	0.192721	0.0962567	1.08707	5	0.0374333	0.193477	-0.14666	0.848035	5	0.04747	0.217876	2.2053	3.32543	5	0.0451113	0.212394	1.29981	2.39176	5	0.915518	0.977462	0.903132
0.306548	0.0871941	-0.183763	0.290941	NaN	NaN	1.69399	1.45595	-0.513338	-0.315235			+	+								1.11e-06	139.32	360900000	1	139.32	2.1317	0.0458584	0.214146	1.09942	2.28855	4	0.0374333	0.193477	0.958604	1.9533	5	0.058782	0.24245	-1.18649	0.159811	4	0.0451113	0.212394	-0.861211	0.230742	5	NaN	3.21094	2.97402
0.306337	1.57827	0.132275	1.47326	NaN	NaN	1.45529	1.20529	2.62287	2.5133			+	+			+	+				1.34e-63	250.19	3865300000	1	127.97	-0.16605	0.0371413	0.192721	0.959887	1.9507	5	0.0374333	0.193477	0.707939	1.70263	5	0.04747	0.217876	2.0628	3.18293	5	0.0451113	0.212394	1.96733	3.05928	5	1.84195	1.45723	1.64745
0.305277	0.482572	0.199214	0.403132	NaN	NaN	0.863077	0.573943	1.31877	1.18912			+				+	+				2.06e-276	428.76	1902900000	1	364.77	-0.77726	0.0371413	0.192721	0.367672	1.35848	5	0.0460981	0.214705	-0.0221731	1.17006	4	0.04747	0.217876	0.758702	1.87884	5	0.0557776	0.236173	0.533401	1.84484	4	1.14518	1.03421	1.09547
0.300658	0.305759	-0.0417823	0.0494407	NaN	NaN	0.563413	0.328694	-0.319573	-0.243842			+									2.88e-05	110.38	776630000	1	54.198	-0.056115	0.0371413	0.192721	0.0680086	1.05882	5	0.0374333	0.193477	-0.168654	0.826042	5	0.04747	0.217876	-0.879641	0.240496	5	0.0451113	0.212394	-0.789818	0.302135	5	-0.11888	0.207744	0.674586
0.299779	1.08344	-0.0686606	0.2881	NaN	NaN	0.627264	0.392659	1.42989	1.52017			+				+	+				6.56e-202	384.56	2440700000	1	349.81	-0.24177	0.0371413	0.192721	0.131859	1.12267	5	0.0374333	0.193477	-0.104689	0.890007	5	0.04747	0.217876	0.869824	1.98996	5	0.0451113	0.212394	0.974193	2.06615	5	0.879734	0.624986	1.03231
0.299337	0.300788	0.116061	0.0840868	NaN	NaN	0.934365	0.696751	1.00405	0.920335			+	+			+	+				0	485.87	1319500000	1	290.18	-0.0045063	0.0371413	0.192721	0.438961	1.42977	5	0.0374333	0.193477	0.199403	1.1941	5	0.04747	0.217876	0.443984	1.56412	5	0.0451113	0.212394	0.374358	1.46631	5	0.642089	1.23125	2.23258
0.298805	0.415188	0.179105	0.182325	NaN	NaN	2.27162	2.01959	3.05793	2.90079			+	+			+	+				2.76e-05	130.01	575440000	1	130.01	-0.70071	0.0371413	0.192721	1.77622	2.76702	5	0.0374333	0.193477	1.52225	2.51694	5	0.04747	0.217876	2.49786	3.618	5	0.0451113	0.212394	2.35481	3.44677	5	2.35475	2.75793	2.62258
0.297119	0.0847808	0.675803	0.734651	NaN	NaN	1.64915	1.30734	0.264624	-0.49441			+	+								1.13e-16	152.35	176030000	1	116.96	0.33793	0.0371413	0.192721	1.15375	2.14455	5	0.0460981	0.214705	0.711227	1.90346	4	0.04747	0.217876	-0.295445	0.824692	5	0.0557777	0.236173	-1.15013	0.161312	4	-0.272942	-0.199966	3.78163
0.295764	0.612112	-0.432705	0.413188	NaN	NaN	1.28297	0.742474	1.42739	1.31149			+				+					3.01e-50	243.99	117780000	1	179.14	3.5614	0.0371413	0.192721	0.787563	1.77837	5	0.150995	0.388581	-4.19492	5.67987	1	0.04747	0.217876	0.867326	1.98746	5	0.192129	0.438325	-4.25796	6.88094	1	1.43978	1.55303	1.52422
0.294605	0.600958	0.229744	0.556666	NaN	NaN	1.63031	1.43754	2.11102	2.02843			+	+			+	+				1.37e-36	212.39	48638000	1	212.39	1.8417	0.0599259	0.244798	0.851256	2.40937	3	0.0460981	0.214705	0.841429	2.03366	4	0.0771789	0.277811	1.22691	2.99514	3	0.0557777	0.236173	1.37271	2.68415	4	1.58302	2.18294	1.82966
0.288328	0.735408	0.273093	0.642027	NaN	NaN	1.22119	0.990734	2.46993	2.22663			+	+			+	+				7.9e-68	243.96	1941600000	1	155.82	-0.70062	0.0371413	0.192721	0.72579	1.7166	5	0.0374333	0.193477	0.493386	1.48808	5	0.04747	0.217876	1.90986	3.03	5	0.0451113	0.212394	1.68065	2.7726	5	1.04084	1.14041	1.58389
0.288034	0.728863	0.5105	1.68102	NaN	NaN	1.78266	1.51385	1.91258	1.39295			+	+			+	+				6.31e-44	232.98	404300000	1	207.3	0.079733	0.0371413	0.192721	1.28725	2.27806	5	0.0460981	0.214705	0.917737	2.10997	4	0.04747	0.217876	1.35251	2.47265	5	0.0557777	0.236173	0.737225	2.04867	4	2.01312	1.56047	2.1905
0.287164	1.33422	-0.0190242	0.111134	NaN	NaN	1.66487	1.43056	1.76114	1.80182			+	+			+	+				0	477.06	1082700000	1	247.01	-0.1103	0.0371413	0.192721	1.16947	2.16027	5	0.0374333	0.193477	0.933208	1.9279	5	0.04747	0.217876	1.20107	2.32121	5	0.0451113	0.212394	1.25584	2.34779	5	1.91604	1.7138	1.88996
0.279593	0.46144	-1.00852	2.27867	NaN	NaN	1.30881	1.16955	0.147957	1.13773			+	+		+		+				0.000157824	112.85	90859000	1	112.85	0.80792	0.0599259	0.244798	0.52975	2.08786	3	0.0460982	0.214705	0.573431	1.76566	4	0.077179	0.277811	-0.736162	1.03208	3	0.0557778	0.236173	0.48201	1.79345	4	NaN	NaN	1.36136
0.278677	1.18114	0.281197	1.07259	NaN	NaN	1.04275	0.823357	1.30998	1.06633			+	+			+	+				3.62e-296	443.2	23027000000	1	218.87	1.0035	0.0371413	0.192721	0.547349	1.53816	5	0.0374333	0.193477	0.326009	1.3207	5	0.04747	0.217876	0.749909	1.87005	5	0.0451113	0.212394	0.520353	1.61231	5	1.27294	0.989825	1.09526
0.27794	1.20158	0.382233	3.32759	NaN	NaN	0.551649	0.338422	1.5204	1.17876			+		++	+	+	+				0.00020715	107.83	238690000	1	107.83	0.35611	0.0371413	0.192721	0.0562449	1.04705	5	0.0374333	0.193477	-0.158926	0.83577	5	0.04747	0.217876	0.960337	2.08047	5	0.0451113	0.212394	0.632781	1.72473	5	0.95423	0.788067	0.644719
0.277036	1.00842	0.187403	0.190784	NaN	NaN	1.95576	1.72773	3.2716	3.10516			+	+			+	+				2.85e-77	265.63	6508700000	1	242.05	-0.025323	0.0371413	0.192721	1.46036	2.45117	5	0.0374333	0.193477	1.23038	2.22508	5	0.04747	0.217876	2.71153	3.83167	5	0.0451113	0.212394	2.55918	3.65114	5	2.4985	2.14489	2.3499
0.276064	3.19426	0.10575	0.919867	NaN	NaN	0.734735	0.521229	1.29479	1.21908			+	+			+	+				4.51e-56	250.05	6907000000	1	250.05	0.33356	0.0371413	0.192721	0.239331	1.23014	5	0.0374333	0.193477	0.0238814	1.01858	5	0.04747	0.217876	0.734724	1.85486	5	0.0451113	0.212394	0.673106	1.76506	5	0.919814	0.728062	0.893211
0.274486	0.826662	0.00276104	0.00410763	NaN	NaN	1.0341	0.818744	1.14755	1.17131			+	+			+	+				1.13e-28	209.21	3280400000	1	118.76	-0.29943	0.0371413	0.192721	0.5387	1.52951	5	0.0374333	0.193477	0.321396	1.31609	5	0.04747	0.217876	0.587484	1.70762	5	0.0451113	0.212394	0.62533	1.71728	5	1.10949	1.08171	1.07468
0.272911	3.16164	0.333022	2.62772	NaN	NaN	1.43985	1.22144	2.09563	1.79739			+	+			+	+				0	499.02	6606900000	1	482.36	-0.32458	0.0371413	0.192721	0.944442	1.93525	5	0.0374333	0.193477	0.724095	1.71879	5	0.04747	0.217876	1.53556	2.6557	5	0.0451113	0.212394	1.25141	2.34336	5	1.58942	1.57797	1.53635
0.272766	0.488526	-0.548821	1.26632	NaN	NaN	0.845923	0.634279	0.0738576	0.632135			+	+				+				1.62e-06	148.91	483780000	1	82.831	-0.52429	0.0371413	0.192721	0.350519	1.34133	5	0.0374333	0.193477	0.136931	1.13163	5	0.04747	0.217876	-0.486211	0.633926	5	0.0451113	0.212394	0.0861581	1.17811	5	0.47257	0.42783	1.1933
0.271115	0.267961	0.466076	0.898636	NaN	NaN	2.1657	1.77941	3.46999	2.98711			+	+			+	+				4.35e-45	226.72	722460000	1	226.72	0.44418	0.0371413	0.192721	1.6703	2.66111	5	0.0460981	0.214705	1.1833	2.37553	4	0.04747	0.217876	2.90993	4.03006	5	0.0557776	0.236173	2.33139	3.64283	4	1.83766	2.07661	3.2682
0.269933	1.46739	0.183538	0.963745	NaN	NaN	0.769839	0.561707	1.61938	1.46719			+	+			+	+				7.81e-75	275.85	22536000000	1	152.16	2.4918	0.0371413	0.192721	0.274435	1.26524	5	0.0374333	0.193477	0.0643587	1.05905	5	0.04747	0.217876	1.05931	2.17945	5	0.0451113	0.212394	0.921209	2.01316	5	1.00795	1.06159	0.964595
0.268657	0.245101	0.496703	1.2656	NaN	NaN	0.902299	0.651127	1.72525	1.1124			+	+			+	+				6.16e-36	217.68	124880000	1	178.67	-1.3091	0.0371413	0.192721	0.406894	1.3977	5	0.0460982	0.214705	0.0550102	1.24724	4	0.04747	0.217876	1.16519	2.28532	5	0.0557778	0.236173	0.456674	1.76812	4	1.23772	0.718069	0.761632
0.268556	0.98665	0.0727806	0.116652	NaN	NaN	1.41818	1.20411	1.80241	1.755			+	+			+	+				4.13e-10	166.87	5828600000	1	108.98	-0.66742	0.0371413	0.192721	0.922776	1.91358	5	0.0374333	0.193477	0.706765	1.70146	5	0.04747	0.217876	1.24234	2.36248	5	0.0451113	0.212394	1.20902	2.30098	5	1.5433	1.31351	1.67152
0.265173	1.0993	-0.568078	1.62242	NaN	NaN	1.25393	1.04488	0.947746	1.51887			+	+			+	+				2.92e-63	256.33	30728000000	1	86.182	-0.30145	0.0371413	0.192721	0.758527	1.74934	5	0.0374333	0.193477	0.547528	1.54222	5	0.04747	0.217876	0.387678	1.50781	5	0.0451113	0.212394	0.972892	2.06484	5	1.42418	1.30411	1.22913
0.264511	1.25684	-0.079895	0.244817	NaN	NaN	0.792593	0.589305	1.37617	1.47754			+	+			+	+				4.25e-95	288.53	4839900000	1	171.36	-0.62927	0.0371413	0.192721	0.297189	1.288	5	0.0374333	0.193477	0.091957	1.08665	5	0.04747	0.217876	0.816102	1.93624	5	0.0451113	0.212394	0.931561	2.02351	5	1.06987	0.641699	1.033
0.261695	0.310081	0.465948	0.765096	NaN	NaN	0.60685	0.416823	0.666071	0.250097			+									1.46e-63	255.21	233080000	1	199.58	0.18992	0.0458584	0.214146	0.0122862	1.20141	4	0.0374333	0.193477	-0.0805252	0.914171	5	0.058782	0.24245	-0.00707866	1.33922	4	0.0451113	0.212394	-0.29588	0.796073	5	1.69553	NaN	0.698678
0.261511	0.273515	-0.358376	0.973347	NaN	NaN	0.6826	0.483359	0.934985	1.30558			+				+	+				1.18e-32	222.34	3764700000	1	222.34	-1.5242	0.0371413	0.192721	0.187195	1.178	5	0.0374333	0.193477	-0.0139889	0.980707	5	0.04747	0.217876	0.374916	1.49505	5	0.0451113	0.212394	0.7596	1.85155	5	0.816771	-0.390512	0.582077
0.260983	0.528378	-0.000215006	0.000286533	NaN	NaN	2.13279	1.76724	2.17965	2.09531			+	+			+	+				1.56e-276	401.56	912990000	1	238.69	-0.45782	0.0371413	0.192721	1.63738	2.62819	5	0.0460981	0.214705	1.17112	2.36335	4	0.04747	0.217876	1.61958	2.73972	5	0.0557777	0.236173	1.43959	2.75104	4	2.45631	2.39586	2.29343
0.260863	1.03768	0.379321	2.60405	NaN	NaN	1.11057	0.864812	1.37306	1.03732			+	+			+	+				4.35e-190	367.99	211000000	1	219.96	-0.30659	0.0371413	0.192721	0.615169	1.60598	5	0.0460981	0.214705	0.268696	1.46093	4	0.04747	0.217876	0.812987	1.93312	5	0.0557777	0.236173	0.381596	1.69304	4	1.30979	0.99858	1.69764
0.257729	0.96622	0.00367568	0.00543914	NaN	NaN	0.632231	0.437109	2.00518	2.02259			+				+	+				1.57e-93	266.98	5521700000	1	237.97	0.7019	0.0371413	0.192721	0.136827	1.12764	5	0.0374333	0.193477	-0.0602394	0.934457	5	0.04747	0.217876	1.44512	2.56525	5	0.0451113	0.212394	1.47661	2.56857	5	0.550548	1.00782	0.884083
0.257089	1.28155	0.210033	1.10812	NaN	NaN	0.962154	0.763953	1.33374	1.15802			+	+			+	+				2.35e-40	191.41	7958700000	1	110.41	0.056495	0.0371413	0.192721	0.466749	1.45756	5	0.0374333	0.193477	0.266605	1.2613	5	0.04747	0.217876	0.773674	1.89381	5	0.0451113	0.212394	0.612044	1.704	5	1.30434	1.17434	1.0194
0.256566	2.72706	0.175165	1.30828	NaN	NaN	0.523649	0.330829	1.26877	1.12682			+				+	+				8.49e-45	235.31	1910900000	1	233	-0.67903	0.0371413	0.192721	0.0282445	1.01905	5	0.0374333	0.193477	-0.166519	0.828177	5	0.04747	0.217876	0.708697	1.82883	5	0.0451113	0.212394	0.580839	1.67279	5	0.715812	0.640169	0.666494
0.255976	0.55198	0.342189	0.704472	NaN	NaN	1.21168	1.02764	2.77496	2.48341			+	+			+	+				5.28e-16	146.09	304870000	1	78.655	1.2296	0.0458584	0.214146	0.617117	1.80624	4	0.0374333	0.193477	0.530287	1.52498	5	0.058782	0.24245	2.10182	3.44811	4	0.0451113	0.212394	1.93744	3.02939	5	1.46768	NaN	1.55693
0.252282	0.879965	0.0679003	0.280136	NaN	NaN	1.76797	1.5653	2.55855	2.51099			+	+			+	+				5.19e-46	237.84	2985900000	1	212.69	0.036359	0.0371413	0.192721	1.27256	2.26337	5	0.0374333	0.193477	1.06795	2.06265	5	0.04747	0.217876	1.99849	3.11862	5	0.0451113	0.212394	1.96501	3.05696	5	1.95352	2.09111	1.91814
0.251916	0.610699	0.0859368	0.219816	NaN	NaN	0.528719	0.340216	0.201402	0.151625			+									7.04e-06	123.67	1350800000	1	78.964	-0.32818	0.0371413	0.192721	0.0333152	1.02412	5	0.0374333	0.193477	-0.157132	0.837564	5	0.04747	0.217876	-0.358666	0.76147	5	0.0451113	0.212394	-0.394351	0.697602	5	1.07435	0.919174	0.383474
0.249668	0.721424	-0.192527	0.178905	NaN	NaN	0.719695	0.447994	1.9654	2.19577			+				+	+				3.1e-124	313.49	82720000	1	202.17	-0.52123	0.0458584	0.214146	0.125131	1.31426	4	0.0599863	0.244921	-0.331454	1.22744	3	0.0587819	0.24245	1.29225	2.63855	4	0.0730558	0.270288	1.33559	3.05595	3	0.727103	1.33182	0.502438
0.249054	0.790649	-0.17603	0.154136	NaN	NaN	1.97773	1.80776	2.31708	2.82105			+	+			+	+				3.89e-46	231.71	515590000	1	228.76	0.52222	0.0371413	0.192721	1.48233	2.47314	5	0.0460981	0.214705	1.21164	2.40387	4	0.04747	0.217876	1.75701	2.87715	5	0.0557776	0.236173	2.16533	3.47677	4	2.18038	2.14523	1.93794
0.247542	0.468814	0.0374978	0.0390764	NaN	NaN	0.846534	0.6586	-0.211646	-0.212447			+	+								2.05e-145	321.88	3362000000	1	321.88	-0.6727	0.0371413	0.192721	0.35113	1.34194	5	0.0374333	0.193477	0.161252	1.15595	5	0.04747	0.217876	-0.771714	0.348422	5	0.0451113	0.212394	-0.758424	0.333529	5	0.613001	0.482928	1.05241
0.24708	0.237249	-0.868271	0.651815	NaN	NaN	1.17928	0.98807	1.44395	2.29908			+	+			+	+				3.78e-243	412.66	2356200000	1	412.66	-0.39599	0.0371413	0.192721	0.683876	1.67468	5	0.0374333	0.193477	0.490722	1.48542	5	0.04747	0.217876	0.883881	2.00402	5	0.0451113	0.212394	1.75311	2.84506	5	0.893326	1.56036	2.58267
0.246971	0.476709	0.536726	1.29946	NaN	NaN	0.81066	0.623662	0.250075	-0.231259			+	+								4.73e-110	302.15	3681000000	1	302.15	-0.58618	0.0371413	0.192721	0.315255	1.30606	5	0.0374333	0.193477	0.126314	1.12101	5	0.04747	0.217876	-0.309993	0.810143	5	0.0451113	0.212394	-0.777235	0.314718	5	0.83623	0.613275	0.584967
0.246356	0.196057	0.321803	0.250669	NaN	NaN	1.40669	1.21362	0.737603	0.458763			+	+			+					0	547.07	1144000000	1	162.52	0.1369	0.0371413	0.192721	0.911282	1.90209	5	0.0374333	0.193477	0.716273	1.71097	5	0.04747	0.217876	0.177535	1.29767	5	0.0451113	0.212394	-0.0872138	1.00474	5	1.63435	1.73114	0.931366
0.246064	0.639463	0.131591	0.421596	NaN	NaN	1.27047	1.0792	1.90072	1.79642			+	+			+	+				2.34e-262	420.05	1045900000	1	332.29	0.80903	0.0371413	0.192721	0.775068	1.76588	5	0.0374333	0.193477	0.581853	1.57655	5	0.04747	0.217876	1.34065	2.46079	5	0.0451113	0.212394	1.25045	2.3424	5	1.50567	1.63198	1.66331
0.245872	1.62276	-0.072176	0.382708	NaN	NaN	1.72266	1.52653	2.76955	2.85464			+	+			+	+				0.000294381	102.52	1484700000	1	102.52	0.13445	0.0371413	0.192721	1.22726	2.21807	5	0.0374333	0.193477	1.02918	2.02388	5	0.04747	0.217876	2.20949	3.32962	5	0.0451113	0.212394	2.30867	3.40062	5	1.92514	1.97112	1.99908
0.244823	0.334479	-2.19228	1.73377	NaN	NaN	0.635118	0.277804	0.863973	2.75929			+			+	+	+				3.65e-35	220.85	541680000	1	220.85	0.40416	0.0371413	0.192721	0.139714	1.13052	5	0.0460981	0.214705	-0.318311	0.87392	4	0.04747	0.217876	0.303905	1.42404	5	0.0557776	0.236173	2.10357	3.41501	4	0.174243	0.170454	1.19799
0.244606	0.584695	0.141133	0.286911	NaN	NaN	0.508269	0.326867	0.805237	0.698802			+				+	+				0.000321842	120.31	3833100000	1	112.41	0.14669	0.0371413	0.192721	0.0128645	1.00367	5	0.0374333	0.193477	-0.170481	0.824215	5	0.04747	0.217876	0.245168	1.36531	5	0.0451113	0.212394	0.152826	1.24478	5	0.861655	0.386907	0.593386
0.242579	0.861682	0.0810066	0.156547	NaN	NaN	0.924855	0.669171	0.784437	0.799129			+				+					3.92e-55	230.29	175880000	1	223.93	0.26508	0.0371413	0.192721	0.429451	1.42026	5	0.0599862	0.244921	-0.110276	1.44862	3	0.04747	0.217876	0.224369	1.34451	5	0.0730557	0.270288	-0.0610485	1.65931	3	1.18472	1.40778	0.767053
0.24204	1.16293	0.0727324	0.079224	NaN	NaN	0.871301	0.688263	1.5261	1.4805			+	+			+	+				3.46e-50	231.52	1166300000	1	215.59	-0.22573	0.0371413	0.192721	0.375896	1.3667	5	0.0374333	0.193477	0.190915	1.18561	5	0.04747	0.217876	0.966036	2.08617	5	0.0451113	0.212394	0.934527	2.02648	5	0.867137	0.822936	0.780561
0.241435	0.921463	-0.265538	1.44745	NaN	NaN	1.5446	1.35462	2.85875	3.12825			+	+			+	+				0.000522646	112.41	1314500000	1	100.98	0.081688	0.0371413	0.192721	1.0492	2.04	5	0.0374333	0.193477	0.857275	1.85197	5	0.04747	0.217876	2.29869	3.41882	5	0.0451113	0.212394	2.58228	3.67423	5	2.09735	1.66376	1.49291
0.241296	1.39359	0.115969	0.517204	NaN	NaN	1.26915	1.08238	1.95942	1.86969			+	+			+	+				1.85e-77	270.74	1321500000	1	160.81	-0.96849	0.0371413	0.192721	0.77375	1.76456	5	0.0374333	0.193477	0.585032	1.57973	5	0.04747	0.217876	1.39935	2.51949	5	0.0451113	0.212394	1.32371	2.41567	5	1.25313	1.40458	1.56019
0.241145	0.963122	-0.0310643	0.0741747	NaN	NaN	0.674372	0.497344	0.893146	0.998683			+				+	+				1.19e-215	388.54	2437900000	1	388.54	-0.17639	0.0371413	0.192721	0.178967	1.16978	5	0.0460982	0.214705	-0.0987731	1.09346	4	0.04747	0.217876	0.333078	1.45321	5	0.0557778	0.236173	0.342961	1.6544	4	0.918101	0.482981	0.5894
0.241058	0.281233	0.0724978	0.0506486	NaN	NaN	1.52262	1.33324	1.88918	1.84149			+	+			+	+				3.21e-15	172.59	2835800000	1	103.05	0.05401	0.0371413	0.192721	1.02721	2.01802	5	0.0374333	0.193477	0.835893	1.83059	5	0.04747	0.217876	1.32911	2.44925	5	0.0451113	0.212394	1.29551	2.38746	5	2.89682	1.91463	1.10756
0.240678	0.578579	-0.248293	0.896049	NaN	NaN	0.792487	0.611609	1.54934	1.8107			+	+			+	+				2.22e-38	220.32	334490000	1	190.27	-0.14575	0.0371413	0.192721	0.297083	1.28789	5	0.0374333	0.193477	0.114261	1.10896	5	0.04747	0.217876	0.989268	2.1094	5	0.0451113	0.212394	1.26472	2.35667	5	0.759323	0.459	1.26384
0.239859	1.27808	-0.0144917	0.0329214	NaN	NaN	0.643961	0.465509	1.74669	1.78313			+				+	+				2.8e-91	296.35	15683000000	1	296.35	1.5087	0.0371413	0.192721	0.148556	1.13936	5	0.0374333	0.193477	-0.0318389	0.962857	5	0.04747	0.217876	1.18663	2.30676	5	0.0451113	0.212394	1.23715	2.3291	5	0.779342	0.589885	1.08662
0.239843	0.899126	0.152258	0.432887	NaN	NaN	0.605227	0.427223	0.870641	0.753147			+				+	+				4.13e-07	138.36	518260000	1	120.09	-0.0058164	0.0371413	0.192721	0.109823	1.10063	5	0.0374333	0.193477	-0.0701254	0.924571	5	0.04747	0.217876	0.310573	1.43071	5	0.0451113	0.212394	0.20717	1.29912	5	0.51707	0.458059	0.833789
0.237068	0.967865	0.376623	0.614724	NaN	NaN	3.24094	3.06204	4.42585	4.0364			+	+			+	+				2.66e-141	319.24	1721300000	1	319.24	-0.33442	0.0371413	0.192721	2.74554	3.73634	5	0.0460981	0.214705	2.46592	3.65815	4	0.04747	0.217876	3.86578	4.98592	5	0.0557776	0.236173	3.38068	4.69212	4	3.7321	3.51619	3.45913
0.236751	0.662828	0.0645107	0.17023	NaN	NaN	0.816277	0.638827	1.56694	1.52895			+	+			+	+				3.71e-96	270.85	476770000	1	229.48	-0.71768	0.0371413	0.192721	0.320873	1.31168	5	0.0374333	0.193477	0.141479	1.13617	5	0.04747	0.217876	1.00687	2.12701	5	0.0451113	0.212394	0.982969	2.07492	5	0.86865	0.45942	0.832457
0.236592	0.199383	-0.258786	0.291151	NaN	NaN	2.52317	2.32684	2.27807	2.54482			+	+			+	+				1.68e-27	206.52	1852600000	1	174.68	0.050674	0.0371413	0.192721	2.02777	3.01858	5	0.0374333	0.193477	1.82949	2.82419	5	0.04747	0.217876	1.718	2.83814	5	0.0451113	0.212394	1.99884	3.0908	5	3.01309	1.60778	3.44584
0.232441	1.03427	0.00675813	0.0149948	NaN	NaN	0.74867	0.576025	0.853953	0.875757			+	+			+	+				6.8e-36	225.19	5866300000	1	209.19	-0.28364	0.0371413	0.192721	0.253266	1.24407	5	0.0374333	0.193477	0.0786771	1.07337	5	0.04747	0.217876	0.293884	1.41402	5	0.0451113	0.212394	0.32978	1.42173	5	1.09594	0.607372	1.07834
0.23233	2.20758	0.108841	0.899368	NaN	NaN	0.947817	0.773055	1.41678	1.33733			+	+			+	+				5.85e-291	442.59	19488000000	1	318.13	2.1815	0.0371413	0.192721	0.452412	1.44322	5	0.0374333	0.193477	0.275707	1.2704	5	0.04747	0.217876	0.856709	1.97685	5	0.0451113	0.212394	0.791356	1.88331	5	1.15021	1.12843	0.994267
0.228415	0.877945	0.0204534	0.0632915	NaN	NaN	2.80709	2.61527	2.80278	2.79905			+	+			+	+				6.78e-05	125.83	2279600000	1	121.64	0.20476	0.0371413	0.192721	2.31168	3.30249	5	0.0374333	0.193477	2.11793	3.11262	5	0.04747	0.217876	2.24271	3.36285	5	0.0451113	0.212394	2.25307	3.34502	5	2.84047	2.81363	3.28513
0.225212	0.42472	0.182093	0.757113	NaN	NaN	0.964375	0.933128	-1.29366	-1.39176			+				-					1.71e-05	100.35	69160000	1	100.35	-2.4891	0.0458584	0.214146	0.369811	1.55894	4	0.0858583	0.293016	-0.327617	2.19387	2	0.058782	0.24245	-1.96681	-0.620511	4	0.105854	0.325351	-2.79163	0.00811657	2	NaN	1.37117	0.965197
0.223419	0.745693	-0.193636	0.808866	NaN	NaN	1.14014	0.971611	1.25839	1.46932			+	+			+	+				0	540.99	4461100000	1	493.05	-0.16965	0.0371413	0.192721	0.644733	1.63554	5	0.0374333	0.193477	0.474263	1.46896	5	0.04747	0.217876	0.698323	1.81846	5	0.0451113	0.212394	0.923344	2.0153	5	1.35682	1.35216	1.15667
0.222866	1.09764	0.137906	0.494207	NaN	NaN	0.518049	0.38125	0.145237	0.122781			+									4.98e-202	387.24	1775400000	1	343.87	-0.22767	0.0371413	0.192721	0.0226449	1.01345	5	0.0460981	0.214705	-0.214866	0.977366	4	0.04747	0.217876	-0.414831	0.705306	5	0.0557776	0.236173	-0.53294	0.778502	4	0.539459	0.364415	0.823062
0.222559	0.835675	-0.0234269	0.0441343	NaN	NaN	1.91634	1.73996	3.88753	3.91885			+	+			+	+				2.48e-131	327.94	4147100000	1	238.43	0.64136	0.0371413	0.192721	1.42093	2.41174	5	0.0374333	0.193477	1.24261	2.23731	5	0.04747	0.217876	3.32746	4.4476	5	0.0451113	0.212394	3.37287	4.46483	5	2.03471	1.69103	2.23709
0.22222	1.318	0.311704	1.76058	NaN	NaN	0.577713	0.416584	1.50952	1.23542			+				+	+				1.81e-185	367.55	1188800000	1	236.59	-0.26651	0.0371413	0.192721	0.0823084	1.07312	5	0.0374333	0.193477	-0.080764	0.913932	5	0.04747	0.217876	0.949454	2.06959	5	0.0451113	0.212394	0.68944	1.78139	5	0.907376	0.516945	0.777504
0.222114	0.353034	0.0652668	0.0706432	NaN	NaN	0.890708	0.839007	2.72817	2.72929			+	+			+	+				2.89e-74	283.03	238110000	1	283.03	0.18209	0.0371413	0.192721	0.395304	1.38611	5	0.0599863	0.244921	0.0595586	1.61845	3	0.04747	0.217876	2.1681	3.28824	5	0.0730558	0.270288	1.86911	3.58947	3	1.43994	1.09844	0.807563
0.220358	0.158542	0.381584	0.322038	NaN	NaN	0.650807	0.490615	0.266883	-0.0661416			+									3.66e-06	129.82	119200000	1	63.76	-0.68377	0.0371413	0.192721	0.155403	1.14621	5	0.0374333	0.193477	-0.00673305	0.987963	5	0.04747	0.217876	-0.293185	0.826952	5	0.0451113	0.212394	-0.612118	0.479835	5	1.21926	0.538438	0.821841
0.220178	0.393176	0.696288	1.30311	NaN	NaN	0.801372	0.63967	1.74576	1.10224			+	+			+	+				3.3e-79	279.44	453140000	1	253.36	3.5817	0.0371413	0.192721	0.305967	1.29678	5	0.0374333	0.193477	0.142322	1.13702	5	0.04747	0.217876	1.18569	2.30583	5	0.0451113	0.212394	0.55626	1.64821	5	0.291678	0.49158	1.47438
0.219356	1.37873	-0.0875324	1.07184	NaN	NaN	0.530821	0.372908	1.3745	1.48319			+				+	+				3.08e-49	229.44	1226400000	1	211.9	0.26418	0.0371413	0.192721	0.0354163	1.02622	5	0.0374333	0.193477	-0.12444	0.870256	5	0.04747	0.217876	0.814435	1.93457	5	0.0451113	0.212394	0.937211	2.02916	5	0.614721	0.394637	0.784918
0.217553	0.463658	-0.202498	0.347468	NaN	NaN	0.620576	0.312563	0.316753	0.315363			+									1.25e-35	222.48	130830000	1	222.48	0.19615	0.0371413	0.192721	0.125171	1.11598	5	0.0460981	0.214705	-0.283553	0.908679	4	0.04747	0.217876	-0.243316	0.876821	5	0.0557777	0.236173	-0.340358	0.971085	4	0.838054	0.317239	0.937839
0.215465	0.740659	0.44164	2.29497	NaN	NaN	0.705365	0.549165	1.12268	0.726742			+	+			+	+				4.79e-129	291.4	598820000	1	255	3.5317	0.0371413	0.192721	0.209961	1.20077	5	0.0374333	0.193477	0.0518166	1.04651	5	0.04747	0.217876	0.562614	1.68275	5	0.0451113	0.212394	0.180765	1.27272	5	1.0351	1.11371	0.779467
0.212637	0.926403	0.136951	0.78435	NaN	NaN	0.792851	0.638334	0.613288	0.51208			+	+			+					6.02e-18	189.57	2909300000	1	189.17	0.43952	0.0371413	0.192721	0.297447	1.28826	5	0.0374333	0.193477	0.140986	1.13568	5	0.04747	0.217876	0.0532193	1.17336	5	0.0451113	0.212394	-0.033897	1.05806	5	0.914295	0.711082	1.00012
0.211329	1.75322	0.0583986	0.326916	NaN	NaN	0.65907	0.507275	1.03311	1.00437			+	+			+	+				1.44e-98	270.81	20033000000	1	247.32	0.34548	0.0371413	0.192721	0.163665	1.15447	5	0.0374333	0.193477	0.00992664	1.00462	5	0.04747	0.217876	0.473043	1.59318	5	0.0451113	0.212394	0.458394	1.55035	5	0.936619	0.710674	0.757194
0.210772	1.74195	0.372275	2.48248	NaN	NaN	0.510858	0.361239	1.3189	0.98806			+				+	+				1.81e-35	224.66	8419100000	1	58.071	-0.42949	0.0371413	0.192721	0.0154535	1.00626	5	0.0374333	0.193477	-0.136109	0.858587	5	0.04747	0.217876	0.758827	1.87896	5	0.0451113	0.212394	0.442083	1.53404	5	0.666426	0.650048	0.574311
0.20912	1.32261	0.152432	0.879479	NaN	NaN	2.07337	1.90788	2.19057	2.06448			+	+			+	+				0.00021378	117.02	396760000	1	117.02	0.45491	0.0371413	0.192721	1.57797	2.56878	5	0.0374333	0.193477	1.41054	2.40523	5	0.04747	0.217876	1.6305	2.75064	5	0.0451113	0.212394	1.51851	2.61046	5	2.09711	2.29009	2.58024
0.208012	0.478401	-0.202348	0.540034	NaN	NaN	3.49838	3.31804	4.32133	4.52104			+	+			+	+				1.17e-35	225.72	3196600000	1	178.4	0.32905	0.0371413	0.192721	3.00297	3.99378	5	0.0374333	0.193477	2.82069	3.81539	5	0.04747	0.217876	3.76126	4.8814	5	0.0451113	0.212394	3.97507	5.06702	5	3.24308	3.63347	3.81978
0.207819	0.492213	0.205909	0.370355	NaN	NaN	1.19341	1.03896	1.59994	1.42647			+	+			+	+				1.89e-78	274.17	3004400000	1	53.553	0.55246	0.0371413	0.192721	0.698006	1.68881	5	0.0374333	0.193477	0.541609	1.5363	5	0.04747	0.217876	1.03987	2.16001	5	0.0451113	0.212394	0.880491	1.97244	5	1.52311	1.45229	0.916509
0.205995	0.843503	0.380964	0.386254	NaN	NaN	1.03707	0.886076	1.31556	0.976429			+	+			+	+				3.1e-29	206.75	121380000000	1	125.97	0.73541	0.0371413	0.192721	0.541667	1.53248	5	0.0374333	0.193477	0.388728	1.38342	5	0.04747	0.217876	0.755487	1.87562	5	0.0451113	0.212394	0.430453	1.52241	5	1.32788	1.12339	1.01415
0.205581	0.73354	-0.497658	3.97666	NaN	NaN	2.47177	2.30517	1.5398	2.03978			+	+		+	+	+				4.78e-200	386.13	10190000000	1	189.45	0.15315	0.0371413	0.192721	1.97637	2.96718	5	0.0374333	0.193477	1.80782	2.80252	5	0.04747	0.217876	0.979732	2.09987	5	0.0451113	0.212394	1.4938	2.58575	5	2.52995	2.83197	2.6208
0.20482	0.483533	-0.273963	0.360831	NaN	NaN	1.11539	0.816968	2.33043	2.05264			+				+					3.07e-215	377.28	158300000	1	377.28	-0.12678	0.0458584	0.214146	0.520831	1.70996	4	0.150995	0.388581	-4.12042	5.75436	1	0.058782	0.24245	1.65728	3.00358	4	0.192129	0.438325	-3.51681	7.62209	1	NaN	1.1882	1.36612
0.203906	0.249734	-0.763444	0.890583	NaN	NaN	0.831059	0.684325	-0.640962	0.127197			+	+			-					3.96e-29	202.84	13445000000	1	86.182	-0.30145	0.0371413	0.192721	0.335655	1.32646	5	0.0374333	0.193477	0.186977	1.18167	5	0.04747	0.217876	-1.20103	-0.0808934	5	0.0451113	0.212394	-0.418779	0.673174	5	1.10976	0.542402	0.512521
0.203591	0.548932	0.0962928	0.339961	NaN	NaN	2.13806	1.97705	2.5136	2.43916			+	+			+	+				8.6e-11	171.76	1557300000	1	171.76	0.084998	0.0371413	0.192721	1.64266	2.63346	5	0.0374333	0.193477	1.4797	2.4744	5	0.04747	0.217876	1.95353	3.07367	5	0.0451113	0.212394	1.89318	2.98513	5	2.49999	2.132	2.48742
0.203271	0.532437	-0.341923	0.62713	NaN	NaN	0.961109	0.813522	0.341675	0.700315			+	+				+				0.000216854	94.309	1642400000	1	83.883	0.25457	0.0371413	0.192721	0.465704	1.45651	5	0.0374333	0.193477	0.316174	1.31087	5	0.04747	0.217876	-0.218393	0.901744	5	0.0451113	0.212394	0.154338	1.24629	5	0.758148	1.41585	0.747173
0.202002	0.39724	0.126674	0.177926	NaN	NaN	1.84681	1.69054	2.92172	2.81561			+	+			+	+				1.55e-77	266.27	1212000000	1	157.84	1.9585	0.0371413	0.192721	1.3514	2.34221	5	0.0374333	0.193477	1.19319	2.18789	5	0.04747	0.217876	2.36165	3.48179	5	0.0451113	0.212394	2.26963	3.36158	5	1.971	2.05545	2.34551
0.201406	0.836279	0.127013	0.807758	NaN	NaN	1.06099	0.914045	1.84552	1.74595			+	+			+	+				1.9e-14	185.99	1353400000	1	185.99	0.579	0.0371413	0.192721	0.565588	1.5564	5	0.0374333	0.193477	0.416697	1.41139	5	0.04747	0.217876	1.28545	2.40559	5	0.0451113	0.212394	1.19998	2.29193	5	1.48234	1.22186	1.24127
0.201278	1.97814	0.190151	1.41824	NaN	NaN	0.510981	0.370287	-0.129335	-0.276697			+									1.39e-56	260.81	7366200000	1	145.71	-0.54065	0.0371413	0.192721	0.0155768	1.00639	5	0.0374333	0.193477	-0.127061	0.867635	5	0.04747	0.217876	-0.689404	0.430733	5	0.0451113	0.212394	-0.822674	0.269279	5	0.713504	0.679957	0.501441
0.200997	1.21699	0.0724624	0.451945	NaN	NaN	0.681782	0.539447	1.43444	1.38968			+	+			+	+				6.92e-277	402.04	4984200000	1	399.59	-0.66689	0.0371413	0.192721	0.186377	1.17719	5	0.0374333	0.193477	0.0420995	1.0368	5	0.04747	0.217876	0.874372	1.99451	5	0.0451113	0.212394	0.843707	1.93566	5	0.854953	0.806531	0.74543
0.197213	0.74951	0.175778	0.573542	NaN	NaN	2.88379	2.72046	2.88299	2.73015			+	+			+	+				3.59e-94	301.62	47286000000	1	234.9	-0.33794	0.0371413	0.192721	2.38839	3.3792	5	0.0374333	0.193477	2.22311	3.21781	5	0.04747	0.217876	2.32292	3.44306	5	0.0451113	0.212394	2.18418	3.27613	5	3.26403	3.03751	2.91654
0.194824	0.0711403	0.47219	0.935037	NaN	NaN	2.24819	1.87911	-0.25349	-0.935348			+	+				-				8.15e-07	133.15	378400000	1	125.89	-0.95385	0.0458584	0.214146	1.65362	2.84275	4	0.0599862	0.244921	1.09967	2.65856	3	0.058782	0.24245	-0.926639	0.419659	4	0.0730557	0.270288	-1.79553	-0.0751707	3	4.20121	0.823288	1.84734
0.194185	0.269167	0.173558	0.873069	NaN	NaN	0.712705	0.576431	1.52988	1.3878			+	+			+	+				3.14e-104	312.74	1658700000	1	312.74	-0.09316	0.0371413	0.192721	0.217301	1.20811	5	0.0374333	0.193477	0.0790832	1.07378	5	0.04747	0.217876	0.969811	2.08995	5	0.0451113	0.212394	0.841824	1.93378	5	0.942843	1.02564	0.963349
0.19278	0.936495	0.158563	0.644729	NaN	NaN	0.752172	0.654362	1.32164	1.24716			+	+			+	+				6.87e-119	316.93	925040000	1	265.64	1.339	0.0371413	0.192721	0.256767	1.24758	5	0.0460981	0.214705	0.0582461	1.25048	4	0.04747	0.217876	0.761569	1.88171	5	0.0557777	0.236173	0.591437	1.90288	4	1.05788	1.09654	0.665805
0.190774	0.252963	0.436906	0.472096	NaN	NaN	0.888178	0.881069	1.02335	0.887519			+	+			+	+				0.00717171	88.681	187620000	1	85.355	-0.94407	0.0599259	0.244798	0.109123	1.66723	3	0.0460982	0.214705	0.284952	1.47719	4	0.0771789	0.277811	0.13923	1.90747	3	0.0557778	0.236173	0.231797	1.54324	4	NaN	0.663513	1.01608
0.190191	1.13898	0.3285	2.5356	NaN	NaN	1.15293	1.0155	2.3553	2.05973			+	+			+	+				0	511.88	40008000000	1	225.44	-0.87999	0.0371413	0.192721	0.657525	1.64833	5	0.0374333	0.193477	0.518154	1.51285	5	0.04747	0.217876	1.79523	2.91537	5	0.0451113	0.212394	1.51375	2.60571	5	1.35764	1.26602	1.40747
0.188862	0.620362	-0.112447	0.582476	NaN	NaN	0.542758	0.413384	1.2883	1.42137			+				+	+				1.41e-94	295.44	950770000	1	237.46	0.34486	0.0371413	0.192721	0.0473539	1.03816	5	0.0374333	0.193477	-0.0839636	0.910732	5	0.04747	0.217876	0.728233	1.84837	5	0.0451113	0.212394	0.875394	1.96735	5	0.538969	0.78519	0.829116
0.188486	0.305329	0.142799	0.234229	NaN	NaN	1.09537	0.960192	1.38002	1.26833			+	+			+	+				1.42e-95	298	1870700000	1	298	-0.18737	0.0371413	0.192721	0.599969	1.59078	5	0.0374333	0.193477	0.462844	1.45754	5	0.04747	0.217876	0.819955	1.94009	5	0.0451113	0.212394	0.72235	1.8143	5	1.4778	0.867314	1.37345
0.18841	0.450707	0.522457	0.965396	NaN	NaN	1.27766	1.14051	2.37384	1.8926			+	+			+	+				9.7e-10	144.65	350410000	1	144.65	-0.08229	0.0371413	0.192721	0.782253	1.77306	5	0.0374333	0.193477	0.643166	1.63786	5	0.04747	0.217876	1.81377	2.93391	5	0.0451113	0.212394	1.34662	2.43858	5	0.999278	1.18323	1.70269
0.187367	0.177532	0.702771	0.516671	NaN	NaN	1.85528	1.71268	2.77802	2.1217			+	+			+	+				7.92e-64	239.1	5690100000	1	210.74	0.27519	0.0371413	0.192721	1.35988	2.35069	5	0.0374333	0.193477	1.21533	2.21003	5	0.04747	0.217876	2.21795	3.33809	5	0.0451113	0.212394	1.57573	2.66768	5	1.89407	1.88826	1.88999
0.187057	0.366926	0.189417	0.333695	NaN	NaN	0.657632	0.528674	1.3596	1.20343			+	+			+	+				2.08e-100	295.87	939620000	1	295.87	0.82478	0.0371413	0.192721	0.162228	1.15304	5	0.0374333	0.193477	0.0313258	1.02602	5	0.04747	0.217876	0.799527	1.91966	5	0.0451113	0.212394	0.657456	1.74941	5	0.88818	0.717014	0.679775
0.186993	0.40329	-0.0589131	0.180403	NaN	NaN	0.499511	0.372377	1.76302	1.84185			+				+	+				0	480.28	3096600000	1	480.28	-0.29345	0.0371413	0.192721	0.00410683	0.994915	5	0.0374333	0.193477	-0.124971	0.869725	5	0.04747	0.217876	1.20295	2.32309	5	0.0451113	0.212394	1.29587	2.38782	5	0.887213	0.569295	0.687619
0.186573	0.484439	-0.228954	0.614029	NaN	NaN	1.04534	0.912513	1.0489	1.29496			+	+			+	+				8.66e-15	164.56	6381800000	1	164.56	-0.65774	0.0371413	0.192721	0.549935	1.54074	5	0.0374333	0.193477	0.415165	1.40986	5	0.04747	0.217876	0.488834	1.60897	5	0.0451113	0.212394	0.74898	1.84093	5	1.31288	0.863551	1.58564
0.185264	1.11954	0.174416	1.51449	NaN	NaN	0.935404	0.805035	0.926956	0.787905			+	+			+	+				1.44e-06	118.08	1672400000	1	42.813	-0.43928	0.0371413	0.192721	0.44	1.43081	5	0.0374333	0.193477	0.307687	1.30238	5	0.04747	0.217876	0.366888	1.48702	5	0.0451113	0.212394	0.241929	1.33388	5	0.919271	1.11005	1.21542
0.184951	0.677589	-0.00540249	0.0285179	NaN	NaN	0.552395	0.426591	1.17552	1.20691			+				+	+				0.000947618	103.87	14264000000	1	80.455	-0.22725	0.0371413	0.192721	0.0569905	1.0478	5	0.0374333	0.193477	-0.0707573	0.923939	5	0.04747	0.217876	0.615453	1.73559	5	0.0451113	0.212394	0.66093	1.75288	5	0.704571	0.560325	0.783612
0.182825	0.705407	0.307073	0.852924	NaN	NaN	0.616359	0.491841	0.8015	0.536344			+				+					1.04e-136	335.41	4587600000	1	267.25	-0.20097	0.0371413	0.192721	0.120955	1.11176	5	0.0374333	0.193477	-0.00550698	0.989189	5	0.04747	0.217876	0.241432	1.36157	5	0.0451113	0.212394	-0.0096325	1.08232	5	0.723843	0.560449	0.651484
0.18237	0.357542	-0.084073	0.179041	NaN	NaN	0.6578	0.533248	0.694728	0.804442			+	+			+	+				2.32e-27	178.66	322900000	1	165.58	1.1401	0.0371413	0.192721	0.162396	1.1532	5	0.0374333	0.193477	0.0358996	1.0306	5	0.04747	0.217876	0.134659	1.2548	5	0.0451113	0.212394	0.258465	1.35042	5	0.955501	0.689059	0.904099
0.180432	0.210158	0.240611	0.358299	NaN	NaN	0.635528	0.513045	1.03129	0.828249			+	+			+	+				2.16e-62	255.22	1182200000	1	255.22	-0.24998	0.0371413	0.192721	0.140124	1.13093	5	0.0374333	0.193477	0.0156975	1.01039	5	0.04747	0.217876	0.471223	1.59136	5	0.0451113	0.212394	0.282272	1.37423	5	0.959627	0.531425	1.42578
0.179785	0.54351	0.0877034	0.143185	NaN	NaN	2.68848	2.54371	2.98086	2.91165			+	+			+	+				2.21e-46	230.96	25945000000	1	230.96	-0.59627	0.0371413	0.192721	2.19307	3.18388	5	0.0374333	0.193477	2.04636	3.04106	5	0.04747	0.217876	2.42079	3.54093	5	0.0451113	0.212394	2.36567	3.45763	5	2.87374	3.40271	2.57355
0.179098	1.04406	0.0576152	0.540528	NaN	NaN	1.13217	1.0054	1.43695	1.40638			+	+			+	+				5.19e-262	422.16	9235500000	1	274.08	0.20066	0.0371413	0.192721	0.636764	1.62757	5	0.0374333	0.193477	0.508054	1.50275	5	0.04747	0.217876	0.876879	1.99702	5	0.0451113	0.212394	0.860402	1.95235	5	1.38811	1.22217	1.3367
0.176893	1.07751	0.0839037	0.406669	NaN	NaN	0.860427	0.738765	1.25546	1.2009			+	+			+	+				6.34e-262	430.76	5689300000	1	430.76	0.32171	0.0371413	0.192721	0.365023	1.35583	5	0.0374333	0.193477	0.241417	1.23611	5	0.04747	0.217876	0.695388	1.81552	5	0.0451113	0.212394	0.65492	1.74687	5	0.996683	0.906194	1.1474
0.17599	0.267882	0.314559	0.947229	NaN	NaN	0.716935	0.600401	0.773135	0.594227			+	+			+					7.81e-59	210.83	270390000	1	210.83	-0.22311	0.0371413	0.192721	0.221531	1.21234	5	0.0460981	0.214705	0.00428526	1.19652	4	0.04747	0.217876	0.213067	1.3332	5	0.0557777	0.236173	-0.061494	1.24995	4	0.798548	0.635781	1.09847
0.174873	0.380536	-0.0263343	0.0613418	NaN	NaN	1.07836	0.964692	1.26443	1.31984			+	+			+	+				0	514.64	517720000	1	465.16	-0.33278	0.0371413	0.192721	0.582951	1.57376	5	0.0460981	0.214705	0.368577	1.56081	4	0.04747	0.217876	0.704361	1.8245	5	0.0557776	0.236173	0.664115	1.97556	4	1.63745	1.24603	0.610362
0.17249	0.122154	-0.321125	0.219033	NaN	NaN	1.531	1.406	1.67454	2.00478			+	+			+	+				7.21e-85	267.55	2840500000	1	164.35	-0.43046	0.0371413	0.192721	1.0356	2.02641	5	0.0374333	0.193477	0.908655	1.90335	5	0.04747	0.217876	1.11447	2.23461	5	0.0451113	0.212394	1.4588	2.55075	5	1.74559	2.45319	1.73441
0.169573	0.146252	0.272658	0.0459951	NaN	NaN	3.33409	3.09218	4.16578	3.88011			+	+			+	+				2.82e-08	138.02	918400000	1	120.6	-1.2783	0.0371413	0.192721	2.83868	3.82949	5	0.0460982	0.214705	2.49607	3.6883	4	0.04747	0.217876	3.60571	4.72585	5	0.0557778	0.236173	3.22439	4.53583	4	4.41079	3.58242	3.60798
0.167905	0.465494	0.201068	0.376597	NaN	NaN	0.676824	0.63124	1.78895	1.6779			+	+			+	+				1.41e-15	135.55	220190000	1	135.55	-0.32073	0.0371413	0.192721	0.181419	1.17223	5	0.0460981	0.214705	0.0351239	1.22736	4	0.04747	0.217876	1.22889	2.34902	5	0.0557776	0.236173	1.02218	2.33363	4	0.999601	0.771244	0.961646
0.167793	1.77636	0.0488173	0.371163	NaN	NaN	0.729632	0.617984	1.17693	1.15643			+	+			+	+				3.01e-27	202.29	4671200000	1	75.89	0.022481	0.0371413	0.192721	0.234228	1.22504	5	0.0374333	0.193477	0.120636	1.11533	5	0.04747	0.217876	0.616858	1.73699	5	0.0451113	0.212394	0.610456	1.70241	5	0.779864	0.919032	1.02486
0.166826	0.352828	0.0917366	0.305196	NaN	NaN	0.886533	0.774045	1.44085	1.37761			+	+			+	+				9.95e-06	115.91	151900000	1	115.91	-1.2942	0.0371413	0.192721	0.391128	1.38194	5	0.0374333	0.193477	0.276697	1.27139	5	0.04747	0.217876	0.880778	2.00092	5	0.0451113	0.212394	0.831634	1.92359	5	0.994754	1.35995	0.768975
0.165611	0.135625	0.562654	1.13319	NaN	NaN	0.73917	0.842676	0.0624305	-0.264144			+	+								6.66e-53	225.23	224480000	1	225.23	-1.3309	0.0458584	0.214146	0.144607	1.33373	4	0.0599862	0.244921	0.0632286	1.62212	3	0.058782	0.24245	-0.610718	0.735579	4	0.0730557	0.270288	-1.12432	0.596033	3	0.914554	0.815904	0.959616
0.164814	0.871451	0.23613	1.20455	NaN	NaN	0.992362	0.880586	1.79656	1.59292			+	+			+	+				1.02e-300	435.39	592350000	1	168.45	-1.5139	0.0371413	0.192721	0.496958	1.48777	5	0.0374333	0.193477	0.383238	1.37793	5	0.04747	0.217876	1.23649	2.35663	5	0.0451113	0.212394	1.04694	2.1389	5	1.18256	0.974761	1.41174
0.16317	0.735275	0.0249954	0.0880456	NaN	NaN	0.904657	0.795404	1.44872	1.44928			+	+			+	+				3.98e-116	313.76	286190000	1	313.76	0.065535	0.0371413	0.192721	0.409252	1.40006	5	0.0374333	0.193477	0.298056	1.29275	5	0.04747	0.217876	0.888655	2.00879	5	0.0451113	0.212394	0.903308	1.99526	5	1.27308	1.01102	0.947371
0.162568	0.653003	0.0588295	0.0487462	NaN	NaN	0.64083	0.535086	1.00691	0.977928			+	+			+	+				2.16e-75	260.82	270520000	1	237.65	0.50653	0.0371413	0.192721	0.145426	1.13623	5	0.0374333	0.193477	0.0377377	1.03243	5	0.04747	0.217876	0.446846	1.56698	5	0.0451113	0.212394	0.431951	1.5239	5	0.737103	0.74323	0.995643
0.162172	0.657802	0.0777721	0.205162	NaN	NaN	0.899278	0.716321	1.7899	1.64739			+	+			+	+				5.96e-10	158.42	320600000	1	103.46	-1.6894	0.0371413	0.192721	0.403873	1.39468	5	0.0460982	0.214705	0.120205	1.31244	4	0.04747	0.217876	1.22983	2.34997	5	0.0557778	0.236173	0.991672	2.30312	4	1.25877	0.84193	0.962451
0.161787	0.489986	0.312051	1.61658	NaN	NaN	0.638217	0.533236	0.425611	0.158091			+	+								1.77e-12	158.04	248350000	1	153.54	-1.0151	0.0371413	0.192721	0.142813	1.13362	5	0.0374333	0.193477	0.0358883	1.03058	5	0.04747	0.217876	-0.134458	0.985679	5	0.0451113	0.212394	-0.387885	0.704068	5	0.760394	0.761392	0.790792
0.159381	0.295772	-0.0718976	0.144814	NaN	NaN	0.756249	0.562204	0.373045	0.473811			+									2.06e-140	336.75	269420000	1	289.32	1.3216	0.0371413	0.192721	0.260845	1.25165	5	0.0460981	0.214705	-0.033912	1.15832	4	0.04747	0.217876	-0.187024	0.933113	5	0.0557777	0.236173	-0.18191	1.12953	4	0.512982	0.743049	1.63874
0.15882	0.101612	-0.763008	0.599441	NaN	NaN	1.93822	1.82153	-1.61058	-0.836651			+	+			-	-				2.34e-130	329.9	1008900000	1	142	-0.31196	0.0371413	0.192721	1.44281	2.43362	5	0.0374333	0.193477	1.32418	2.31888	5	0.04747	0.217876	-2.17065	-1.05051	5	0.0451113	0.212394	-1.38263	-0.290675	5	1.90389	2.33991	2.06217
0.157254	0.383184	0.0460506	0.178491	NaN	NaN	0.918023	0.814183	2.84609	2.81759			+	+			+	+				9.63e-08	158.47	154540000	1	133.83	-0.60908	0.0371413	0.192721	0.422619	1.41343	5	0.0374333	0.193477	0.316835	1.31153	5	0.04747	0.217876	2.28602	3.40616	5	0.0451113	0.212394	2.27161	3.36356	5	1.45596	1.20518	0.602528
0.156966	0.27321	-0.630707	1.14892	NaN	NaN	1.16167	1.10484	-0.587275	0.0178547			+	+			-					9.11e-06	146.79	794290000	1	146.79	0.28146	0.0371413	0.192721	0.66627	1.65708	5	0.0460981	0.214705	0.508725	1.70096	4	0.04747	0.217876	-1.14734	-0.0272064	5	0.0557776	0.236173	-0.637866	0.673576	4	0.605213	0.997212	1.38259
0.156701	0.617397	0.138936	0.469775	NaN	NaN	0.730034	0.62881	1.66127	1.55147			+	+			+	+				1.95e-36	220.66	5054900000	1	102.52	-0.026689	0.0371413	0.192721	0.234629	1.22544	5	0.0374333	0.193477	0.131462	1.12616	5	0.04747	0.217876	1.1012	2.22134	5	0.0451113	0.212394	1.0055	2.09745	5	0.719485	0.961245	0.733585
0.156508	0.208792	-0.449727	1.48818	NaN	NaN	1.00918	0.905022	1.45863	1.91327			+	+			+	+				2.53e-27	201.13	1472200000	1	201.13	0.59903	0.0371413	0.192721	0.513772	1.50458	5	0.0374333	0.193477	0.407674	1.40237	5	0.04747	0.217876	0.898562	2.0187	5	0.0451113	0.212394	1.36729	2.45925	5	2.09899	1.22256	0.998135
0.154083	1.07614	0.103199	0.597797	NaN	NaN	0.803335	0.723128	1.25648	1.2193			+	+			+	+				1.54e-98	268.22	218020000	1	268.22	-0.60262	0.0458584	0.214146	0.208772	1.3979	4	0.0460981	0.214705	0.127012	1.31924	4	0.0587819	0.24245	0.583334	1.92963	4	0.0557776	0.236173	0.563579	1.87502	4	1.09492	0.830839	0.837888
0.152057	0.158556	-0.0917254	0.0868888	NaN	NaN	2.64236	2.52418	2.39833	2.50449			+	+			+	+				1.71e-261	430.99	5965800000	1	343.05	-0.47866	0.0371413	0.192721	2.14696	3.13777	5	0.0374333	0.193477	2.02684	3.02153	5	0.04747	0.217876	1.83827	2.9584	5	0.0451113	0.212394	1.95852	3.05047	5	3.19259	3.49617	1.74681
0.15045	1.42342	0.106328	0.928335	NaN	NaN	0.657094	0.562562	1.62299	1.54463			+	+			+	+				1.9e-88	288.22	49209000000	1	131.52	0.20533	0.0371413	0.192721	0.16169	1.1525	5	0.0374333	0.193477	0.0652142	1.05991	5	0.04747	0.217876	1.06292	2.18306	5	0.0451113	0.212394	0.998654	2.09061	5	0.753893	0.912976	0.830996
0.148364	0.346309	0.272536	0.948419	NaN	NaN	1.18764	1.10475	1.53319	1.30472			+	+			+	+				4.17e-105	267.26	290260000	1	175.59	0.21721	0.0458584	0.214146	0.593074	1.7822	4	0.0374333	0.193477	0.607403	1.6021	5	0.058782	0.24245	0.860039	2.20634	4	0.0451113	0.212394	0.758744	1.8507	5	1.53592	NaN	1.12818
0.146957	0.277394	0.339974	1.44443	NaN	NaN	1.0924	0.996301	1.64111	1.33912			+	+			+	+				2.2e-21	187.51	1270500000	1	180.62	0.5038	0.0371413	0.192721	0.596999	1.58781	5	0.0374333	0.193477	0.498953	1.49365	5	0.04747	0.217876	1.08104	2.20118	5	0.0451113	0.212394	0.793139	1.88509	5	1.70458	0.674382	1.35003
0.145268	0.292441	0.388158	0.438474	NaN	NaN	0.712755	0.622474	1.18742	0.842234			+	+			+	+				2.42e-190	349.88	15721000000	1	97.472	-0.046657	0.0371413	0.192721	0.217351	1.20816	5	0.0374333	0.193477	0.125126	1.11982	5	0.04747	0.217876	0.627355	1.74749	5	0.0451113	0.212394	0.296258	1.38821	5	0.939406	0.281157	1.058
0.142627	0.232428	-0.0818162	0.14972	NaN	NaN	1.17654	0.924498	2.57519	2.62511			+	+			+	+				0.000400499	87.001	55380000	1	81.278	-0.2457	0.0371413	0.192721	0.681134	1.67194	5	0.0460981	0.214705	0.328382	1.52061	4	0.04747	0.217876	2.01512	3.13526	5	0.0557777	0.236173	1.96939	3.28084	4	0.9026	1.63274	1.65298
0.140804	0.264393	-0.166644	0.29752	NaN	NaN	1.87715	1.77808	3.72605	3.89541			+	+			+	+				7.34e-139	343.7	6465100000	1	298.7	0.38589	0.0371413	0.192721	1.38175	2.37256	5	0.0374333	0.193477	1.28074	2.27543	5	0.04747	0.217876	3.16599	4.28612	5	0.0451113	0.212394	3.34943	4.44139	5	2.21057	1.81874	2.34014
0.138134	0.834607	0.0171166	0.0693738	NaN	NaN	0.783957	0.69959	1.23961	1.24905			+	+			+	+				3.45e-81	287.54	1909000000	1	81.788	-0.90261	0.0371413	0.192721	0.288553	1.27936	5	0.0374333	0.193477	0.202242	1.19694	5	0.04747	0.217876	0.679545	1.79968	5	0.0451113	0.212394	0.703069	1.79502	5	1.06614	0.868765	1.07104
0.137422	0.204615	0.176138	0.554469	NaN	NaN	1.0812	0.994186	1.25227	1.10949			+	+			+	+				1.81e-14	186.24	6347400000	1	122.86	0.56313	0.0371413	0.192721	0.585793	1.5766	5	0.0374333	0.193477	0.496838	1.49153	5	0.04747	0.217876	0.692199	1.81234	5	0.0451113	0.212394	0.563515	1.65547	5	1.50221	1.48548	1.23361
0.136271	0.441506	0.432008	1.62404	NaN	NaN	2.83141	2.62057	2.84104	2.52207			+	+			+	+				3.62e-13	159.94	725190000	1	69.456	-0.35512	0.0371413	0.192721	2.336	3.32681	5	0.0460981	0.214705	2.02445	3.21669	4	0.04747	0.217876	2.28097	3.40111	5	0.0557777	0.236173	1.86635	3.17779	4	2.96921	3.23665	3.01332
0.135077	0.199716	0.0737263	0.0570288	NaN	NaN	0.645929	0.565975	1.05612	1.01257			+	+			+	+				1.91e-216	393.95	35675000000	1	153.33	0.15611	0.0371413	0.192721	0.150525	1.14133	5	0.0374333	0.193477	0.0686273	1.06332	5	0.04747	0.217876	0.496048	1.61618	5	0.0451113	0.212394	0.466589	1.55854	5	0.473818	0.844754	0.87295
0.134702	0.912447	-0.21896	0.826302	NaN	NaN	1.33114	1.2439	1.11413	1.3502			+	+			+	+				1.06e-55	249.19	533410000	1	243.3	-0.24909	0.0371413	0.192721	0.835733	1.82654	5	0.0374333	0.193477	0.746547	1.74124	5	0.04747	0.217876	0.554058	1.67419	5	0.0451113	0.212394	0.804226	1.89618	5	1.34695	1.68399	1.48599
0.13318	0.410452	-0.164465	0.603586	NaN	NaN	1.95878	1.72912	3.22705	3.27026			+	+			+	+				4.93e-14	177.57	5829700000	1	172.8	-0.11177	0.0371413	0.192721	1.46337	2.45418	5	0.0460981	0.214705	1.13301	2.32524	4	0.04747	0.217876	2.66698	3.78712	5	0.0557776	0.236173	2.61454	3.92598	4	2.18405	2.0126	2.37539
0.131267	0.101555	0.0282389	0.0210563	NaN	NaN	0.852474	0.773799	0.748255	0.750184			+	+			+	+				9.1e-22	187.49	20189000000	1	52.132	-0.1721	0.0371413	0.192721	0.35707	1.34788	5	0.0374333	0.193477	0.276451	1.27115	5	0.04747	0.217876	0.188186	1.30832	5	0.0451113	0.212394	0.204208	1.29616	5	1.32438	0.305983	0.846113
0.12914	0.769531	-0.221028	1.12262	NaN	NaN	1.3379	1.25581	2.05604	2.28809			+	+			+	+				3.14e-185	370.25	1292500000	1	334.65	-0.017554	0.0371413	0.192721	0.842495	1.8333	5	0.0374333	0.193477	0.758463	1.75316	5	0.04747	0.217876	1.49597	2.61611	5	0.0451113	0.212394	1.74211	2.83406	5	1.39109	1.41376	1.74623
0.129085	0.428247	0.143397	0.793919	NaN	NaN	0.714397	0.639314	2.1588	2.04156			+	+			+	+				4.75e-60	222.42	442420000	1	222.42	0.23634	0.0371413	0.192721	0.218993	1.2098	5	0.0374333	0.193477	0.141966	1.13666	5	0.04747	0.217876	1.59873	2.71886	5	0.0451113	0.212394	1.49558	2.58753	5	1.0586	0.823039	0.991288
0.127589	0.932097	0.0643564	0.822047	NaN	NaN	0.829975	0.755009	0.794197	0.761281			+	+			+	+				0	480.55	17683000000	1	480.55	1.0161	0.0371413	0.192721	0.33457	1.32538	5	0.0374333	0.193477	0.257661	1.25236	5	0.04747	0.217876	0.234128	1.35426	5	0.0451113	0.212394	0.215304	1.30726	5	1.07218	1.11052	0.872912
0.127275	0.126744	0.289236	0.501866	NaN	NaN	0.714462	0.64108	1.20622	0.955549			+	+			+	+				2.02e-12	157.22	186450000	1	157.22	-0.54292	0.0371413	0.192721	0.219058	1.20987	5	0.0374333	0.193477	0.143732	1.13843	5	0.04747	0.217876	0.646157	1.76629	5	0.0451113	0.212394	0.409572	1.50153	5	1.48291	1.08053	0.395758
0.127081	0.79241	-0.0569047	0.356305	NaN	NaN	1.70281	1.61859	2.94787	3.01721			+	+			+	+				5.29e-82	297.54	16144000000	1	191.19	-0.29924	0.0371413	0.192721	1.20741	2.19821	5	0.0374333	0.193477	1.12124	2.11594	5	0.04747	0.217876	2.3878	3.50794	5	0.0451113	0.212394	2.47124	3.56319	5	1.89516	1.82234	1.89803
0.126801	0.226907	0.166391	0.297767	NaN	NaN	0.614532	0.54271	0.479581	0.351062			+	+								1.17e-06	138.51	1559700000	1	56.654	-0.58061	0.0371413	0.192721	0.119128	1.10994	5	0.0374333	0.193477	0.0453618	1.04006	5	0.04747	0.217876	-0.0804878	1.03965	5	0.0451113	0.212394	-0.194915	0.897038	5	1.0373	1.28012	0.306891
0.12642	0.368358	0.177974	1.03929	NaN	NaN	1.36298	1.28317	2.61285	2.45963			+	+			+	+				1.84e-63	257.77	6152800000	1	257.77	0.13597	0.0371413	0.192721	0.867572	1.85838	5	0.0374333	0.193477	0.785818	1.78051	5	0.04747	0.217876	2.05278	3.17292	5	0.0451113	0.212394	1.91366	3.00561	5	1.97216	1.17864	1.25699
0.126347	0.073896	0.60304	1.09856	NaN	NaN	1.85593	1.80357	1.67559	1.26085			+	+			+	+				1.05e-32	198.98	155640000	1	198.98	0.42355	0.0371413	0.192721	1.36052	2.35133	5	0.0599861	0.244921	1.02412	2.58301	3	0.04747	0.217876	1.11552	2.23566	5	0.0730556	0.270288	0.400676	2.12103	3	2.48475	2.50587	1.48316
0.124573	0.0711311	-0.475154	0.423804	NaN	NaN	0.742115	0.670965	-0.252398	0.237488			+	+								5.75e-58	257.15	3436700000	1	257.15	-0.01621	0.0371413	0.192721	0.246711	1.23752	5	0.0374333	0.193477	0.173617	1.16831	5	0.04747	0.217876	-0.812466	0.30767	5	0.0451113	0.212394	-0.308488	0.783465	5	-0.183657	1.10272	0.337902
0.123939	0.445178	-0.0507451	0.211929	NaN	NaN	0.723651	0.653303	0.41091	0.490553			+	+								9.17e-223	383.36	6638500000	1	383.36	-0.58692	0.0371413	0.192721	0.228246	1.21906	5	0.0374333	0.193477	0.155955	1.15065	5	0.04747	0.217876	-0.149158	0.970979	5	0.0451113	0.212394	-0.0554239	1.03653	5	0.892896	0.973401	0.93447
0.122682	0.172017	-0.0892762	0.161657	NaN	NaN	2.04669	1.96277	2.30717	2.41157			+	+			+	+				9.69e-37	219.68	1151700000	1	143.25	-1.8563	0.0371413	0.192721	1.55128	2.54209	5	0.0374333	0.193477	1.46542	2.46011	5	0.04747	0.217876	1.7471	2.86724	5	0.0451113	0.212394	1.86559	2.95755	5	2.19418	2.04844	2.34196
0.12108	0.316799	0.033799	0.134105	NaN	NaN	0.525801	0.460348	0.086311	0.0871465			+									9.14e-06	144.17	9599700000	1	100.55	0.62476	0.0371413	0.192721	0.0303968	1.02121	5	0.0374333	0.193477	-0.0370004	0.957696	5	0.04747	0.217876	-0.473757	0.646379	5	0.0451113	0.212394	-0.45883	0.633123	5	0.946631	0.53403	0.650758
0.120686	0.340294	-0.231818	0.525438	NaN	NaN	1.30235	1.23836	2.2768	2.57823			+	+			+	+				7.57e-07	150.18	2388300000	1	71.548	-0.2623	0.0371413	0.192721	0.806945	1.79775	5	0.0460981	0.214705	0.642246	1.83448	4	0.04747	0.217876	1.71673	2.83687	5	0.0557776	0.236173	1.92251	3.23395	4	1.52007	0.901561	1.67915
0.119822	0.538751	-0.213098	1.14748	NaN	NaN	1.44453	1.37002	1.53578	1.76355			+	+			+	+				8.44e-113	305.1	956050000	1	305.1	-0.46787	0.0371413	0.192721	0.949128	1.93994	5	0.0374333	0.193477	0.872669	1.86736	5	0.04747	0.217876	0.975707	2.09584	5	0.0451113	0.212394	1.21758	2.30953	5	1.77851	1.48785	1.6808
0.119065	0.182067	0.249254	0.334025	NaN	NaN	1.00126	0.735661	2.72233	2.37108			+	+			+	+				1.21e-75	271.26	1712400000	1	268.17	-0.13243	0.0371413	0.192721	0.505858	1.49667	5	0.0460981	0.214705	0.139545	1.33178	4	0.04747	0.217876	2.16226	3.2824	5	0.0557776	0.236173	1.71536	3.0268	4	0.758089	1.10608	1.37165
0.117804	0.534268	0.127479	0.506108	NaN	NaN	0.896366	0.82986	1.11104	1.01572			+	+			+	+				3.24e-102	298.96	1724900000	1	192.94	0.016119	0.0371413	0.192721	0.400961	1.39177	5	0.0374333	0.193477	0.332512	1.32721	5	0.04747	0.217876	0.550971	1.67111	5	0.0451113	0.212394	0.469739	1.56169	5	1.00528	1.04753	1.09251
0.117732	0.434832	0.148728	0.57999	NaN	NaN	0.563156	0.500433	0.609416	0.496965			+	+			+					1.95e-28	203.7	1071900000	1	203.7	0.038165	0.0371413	0.192721	0.0677518	1.05856	5	0.0374333	0.193477	0.00308537	0.997781	5	0.04747	0.217876	0.0493472	1.16948	5	0.0451113	0.212394	-0.0490113	1.04294	5	0.697681	1.01746	0.618494
0.11656	0.116179	0.0116548	0.00899803	NaN	NaN	0.60595	0.649554	-1.03105	-0.9994			+				-	-				1.06e-08	142.38	102940000	1	100.35	-2.4891	0.0458584	0.214146	0.011386	1.20051	4	0.0599862	0.244921	-0.129893	1.429	3	0.058782	0.24245	-1.7042	-0.357897	4	0.0730556	0.270288	-1.85958	-0.139223	3	NaN	-0.155178	0.965197
0.115282	0.476168	-0.0928341	0.176793	NaN	NaN	0.505435	0.460331	0.926214	0.895297			+				+	+				1.15e-50	232.56	368560000	1	232.56	-0.22952	0.0371413	0.192721	0.0100312	1.00084	5	0.0460981	0.214705	-0.135785	1.05645	4	0.04747	0.217876	0.366146	1.48628	5	0.0557777	0.236173	0.239575	1.55102	4	0.488936	0.842342	0.555991
0.11399	1.00098	-0.0245162	0.103164	NaN	NaN	3.43997	3.34869	4.08536	4.11646			+	+			+	+				7.35e-127	303.19	20577000000	1	55.852	0.2302	0.0371413	0.192721	2.94456	3.93537	5	0.0374333	0.193477	2.85134	3.84603	5	0.04747	0.217876	3.5253	4.64543	5	0.0451113	0.212394	3.57048	4.66244	5	3.74142	3.65205	3.59622
0.113443	0.928321	0.208435	1.21759	NaN	NaN	1.26042	1.19396	1.24803	1.07438			+	+			+	+				0	568.12	11982000000	1	276.69	-0.32721	0.0371413	0.192721	0.765016	1.75582	5	0.0374333	0.193477	0.696608	1.6913	5	0.04747	0.217876	0.68796	1.8081	5	0.0451113	0.212394	0.528407	1.62036	5	1.52467	1.3183	1.39355
0.1112	0.491415	0.0533679	0.0764323	NaN	NaN	1.09616	1.03364	2.79892	2.76372			+	+			+	+				2.13e-06	156.75	655320000	1	86.136	1.0005	0.0371413	0.192721	0.600758	1.59157	5	0.0374333	0.193477	0.53629	1.53099	5	0.04747	0.217876	2.23885	3.35898	5	0.0451113	0.212394	2.21774	3.30969	5	1.28422	0.871675	1.20896
0.110512	0.115695	0.335986	0.312799	NaN	NaN	0.629563	0.448479	2.69786	2.28851			+				+	+				3.45e-06	136.96	1465300000	1	130.41	0.8922	0.0458584	0.214146	0.0349988	1.22413	4	0.0460981	0.214705	-0.147637	1.0446	4	0.058782	0.24245	2.02472	3.37101	4	0.0557777	0.236173	1.63279	2.94423	4	1.24137	NaN	0.109756
0.109011	0.0902209	-0.311476	0.478352	NaN	NaN	1.16937	1.10808	1.49871	1.82084			+	+			+	+				1.65e-36	216.01	600440000	1	49.512	3.2004	0.0371413	0.192721	0.673963	1.66477	5	0.0374333	0.193477	0.610737	1.60543	5	0.04747	0.217876	0.938644	2.05878	5	0.0451113	0.212394	1.27486	2.36682	5	1.26253	1.42672	1.4132
0.108215	0.0886944	0.625457	1.22126	NaN	NaN	1.11549	1.62648	-0.234153	-0.210863			+	+								2.95e-07	136.93	115860000	1	125.54	2.1581	0.0458584	0.214146	0.520929	1.71006	4	0.0858583	0.293016	0.36573	2.88722	2	0.058782	0.24245	-0.907302	0.438996	4	0.105854	0.325351	-1.61074	1.18901	2	2.12846	0.522403	1.15427
0.103932	0.180631	-0.145561	0.435597	NaN	NaN	0.832973	0.839241	1.64878	1.79682			+	+			+	+				1.2e-31	200.09	788660000	1	200.09	1.5006	0.0458584	0.214146	0.238409	1.42754	4	0.0460981	0.214705	0.243125	1.43536	4	0.058782	0.24245	0.975629	2.32193	4	0.0557777	0.236173	1.14109	2.45254	4	NaN	1.19976	1.10417
0.103514	1.35252	-0.0579853	0.526182	NaN	NaN	0.519457	0.470591	0.985191	1.06809			+				+	+				0	496.37	2263400000	1	469.19	-0.28337	0.0371413	0.192721	0.0240529	1.01486	5	0.0374333	0.193477	-0.0267572	0.967939	5	0.04747	0.217876	0.425123	1.54526	5	0.0451113	0.212394	0.522118	1.61407	5	0.696826	0.607113	0.6405
0.103095	0.176213	-0.104384	0.107131	NaN	NaN	0.592875	0.543584	0.713344	0.84237			+	+			+	+				7.95e-108	298.34	260890000	1	277.1	1.1292	0.0371413	0.192721	0.097471	1.08828	5	0.0374333	0.193477	0.046236	1.04093	5	0.04747	0.217876	0.153276	1.27341	5	0.0451113	0.212394	0.296393	1.38835	5	1.58543	0.359898	0.424725
0.100166	0.763351	-0.0090699	0.0402567	NaN	NaN	0.915548	0.865412	1.06658	1.10217			+	+			+	+				2.23e-101	287.33	1136200000	1	287.33	0.28585	0.0371413	0.192721	0.420143	1.41095	5	0.0374333	0.193477	0.368064	1.36276	5	0.04747	0.217876	0.506513	1.62665	5	0.0451113	0.212394	0.556194	1.64815	5	1.17744	0.974124	1.08304
0.100026	0.261624	0.124393	0.250459	NaN	NaN	1.075	1.02321	1.91022	1.81275			+	+			+	+				1.16e-114	305.87	1122600000	1	234.62	-2.4723	0.0371413	0.192721	0.579592	1.5704	5	0.0374333	0.193477	0.525866	1.52056	5	0.04747	0.217876	1.35016	2.47029	5	0.0451113	0.212394	1.26677	2.35873	5	1.39507	1.50077	1.30756
0.0990491	0.140693	0.425942	0.563831	NaN	NaN	0.721941	0.675014	1.57686	1.19304			+	+			+	+				8.63e-21	173.72	1007900000	1	93.766	0.14228	0.0371413	0.192721	0.226537	1.21735	5	0.0374333	0.193477	0.177666	1.17236	5	0.04747	0.217876	1.0168	2.13693	5	0.0451113	0.212394	0.647065	1.73902	5	0.419973	0.443657	0.912943
0.0971798	0.265609	0.325244	0.902592	NaN	NaN	0.800274	0.754232	4.11129	3.80762			+	+			+	+				1.1e-07	129.82	770370000	1	101.39	0.034502	0.0371413	0.192721	0.30487	1.29568	5	0.0374333	0.193477	0.256884	1.25158	5	0.04747	0.217876	3.55122	4.67135	5	0.0451113	0.212394	3.26164	4.3536	5	0.582134	0.787036	0.974885
0.0971628	0.247313	-0.0889454	0.376821	NaN	NaN	0.822453	0.776179	1.92295	2.02948			+	+			+	+				7.35e-127	321.86	5811300000	1	301.38	-0.33036	0.0371413	0.192721	0.327048	1.31786	5	0.0374333	0.193477	0.278831	1.27353	5	0.04747	0.217876	1.36288	2.48302	5	0.0451113	0.212394	1.48351	2.57546	5	1.00099	0.624247	0.929002
0.0969751	0.0574694	-0.0675286	0.0349659	NaN	NaN	1.36867	1.35874	2.3832	2.51709			+	+			+	+				0.000991422	109.44	449700000	1	105.2	-0.11385	0.0599259	0.244798	0.589613	2.14772	3	0.0374333	0.193477	0.861395	1.85609	5	0.0771789	0.277811	1.49908	3.26731	3	0.0451113	0.212394	1.97111	3.06307	5	NaN	1.30041	1.73608
0.0961017	0.083788	-0.673643	0.430215	NaN	NaN	1.61521	1.56109	1.30079	1.97064			+	+			+	+				8.6e-57	264.28	2481000000	1	257.78	1.0794	0.0371413	0.192721	1.1198	2.11061	5	0.0374333	0.193477	1.06374	2.05844	5	0.04747	0.217876	0.740718	1.86085	5	0.0451113	0.212394	1.42467	2.51662	5	1.99972	2.1403	0.244599
0.0941791	0.31	0.0198637	0.026995	NaN	NaN	1.12463	1.0778	1.70217	1.70603			+	+			+	+				3.53e-28	195.87	11234000000	1	173.25	-0.23593	0.0371413	0.192721	0.629229	1.62004	5	0.0374333	0.193477	0.580448	1.57514	5	0.04747	0.217876	1.14211	2.26224	5	0.0451113	0.212394	1.16005	2.252	5	1.61109	1.22969	1.1727
0.0938658	0.305939	0.35304	1.52871	NaN	NaN	0.534868	0.486667	0.686629	0.319541			+				+					2.05e-118	303.34	1213500000	1	53.094	-0.060232	0.0371413	0.192721	0.0394637	1.03027	5	0.0460981	0.214705	-0.109449	1.08278	4	0.04747	0.217876	0.126561	1.2467	5	0.0557777	0.236173	-0.336181	0.975262	4	0.91835	0.351402	0.667297
0.0900619	0.0542839	0.0578781	0.0363857	NaN	NaN	0.901896	0.664838	2.11184	1.95286			+				+	+				5.25e-61	229.92	797230000	1	218.87	1.0035	0.0458584	0.214146	0.307332	1.49646	4	0.0599861	0.244921	-0.114608	1.44429	3	0.058782	0.24245	1.43869	2.78499	4	0.0730556	0.270288	1.09268	2.81303	3	-0.459081	1.10287	1.61706
0.0846168	0.16485	1.0955	2.41618	NaN	NaN	1.07992	NaN	1.36116	NaN			+		++	+	+					3.29e-76	278.62	44329000	1	201.3	-1.4843	0.0458584	0.214146	0.485357	1.67448	4	NaN	NaN	NaN	NaN	NaN	0.058782	0.24245	0.688013	2.03431	4	NaN	NaN	NaN	NaN	NaN	NaN	1.00217	1.33845
0.0833531	0.167415	0.149154	0.463394	NaN	NaN	0.909134	0.764762	1.54175	1.34373			+	+			+	+				0.00417026	68.893	299340000	1	53.756	1.3222	0.0371413	0.192721	0.41373	1.40454	5	0.0460981	0.214705	0.168647	1.36088	4	0.04747	0.217876	0.981685	2.10182	5	0.0557776	0.236173	0.68801	1.99945	4	1.54657	0.874151	1.01365
0.0832628	0.438189	0.0266673	0.0956042	NaN	NaN	0.514836	0.485061	0.432459	0.437908			+									7.28e-188	357.43	6370400000	1	328.55	0.1373	0.0371413	0.192721	0.0194313	1.01024	5	0.0374333	0.193477	-0.0122866	0.982409	5	0.04747	0.217876	-0.127609	0.992528	5	0.0451113	0.212394	-0.108069	0.983884	5	0.928448	0.557563	0.602258
0.083115	0.0929375	-0.159241	0.176206	NaN	NaN	2.62625	2.57307	2.9621	3.12925			+	+			+	+				1.3e-103	305.48	2393900000	1	176.56	-0.36585	0.0371413	0.192721	2.13084	3.12165	5	0.0374333	0.193477	2.07572	3.07041	5	0.04747	0.217876	2.40203	3.52217	5	0.0451113	0.212394	2.58327	3.67522	5	3.23685	3.07801	2.95296
0.0829478	0.152582	0.0486884	0.0730593	NaN	NaN	0.933867	0.899717	1.01397	0.99464			+	+			+	+				0	422.37	3904900000	1	225.57	0.00016077	0.0371413	0.192721	0.438463	1.42927	5	0.0374333	0.193477	0.402369	1.39706	5	0.04747	0.217876	0.453901	1.57404	5	0.0451113	0.212394	0.448663	1.54062	5	1.08744	0.783565	1.16952
0.0804685	0.0730089	0.618657	0.987248	NaN	NaN	1.40935	1.39118	2.54235	2.01769			+	+			+	+				2.24e-36	209.23	198230000	1	209.23	-0.42468	0.0371413	0.192721	0.913948	1.90476	5	0.0599863	0.244921	0.611728	2.17062	3	0.04747	0.217876	1.98228	3.10242	5	0.0730558	0.270288	1.15751	2.87787	3	1.53324	1.25723	1.48556
0.0782364	0.112911	0.00293994	0.00268276	NaN	NaN	1.56231	1.52559	2.93525	2.94742			+	+			+	+				2.25e-241	401.03	4689500000	1	401.03	0.24486	0.0371413	0.192721	1.06691	2.05772	5	0.0374333	0.193477	1.02824	2.02293	5	0.04747	0.217876	2.37518	3.49531	5	0.0451113	0.212394	2.40144	3.49339	5	2.18113	2.38149	1.49083
0.0776473	0.157308	-0.0222976	0.0374612	NaN	NaN	0.762671	0.735413	2.97247	3.00854			+	+			+	+				8.71e-06	128.81	973370000	1	128.81	0.12748	0.0371413	0.192721	0.267266	1.25807	5	0.0374333	0.193477	0.238065	1.23276	5	0.04747	0.217876	2.4124	3.53254	5	0.0451113	0.212394	2.46257	3.55452	5	0.86401	0.204245	1.18878
0.0685902	0.24061	0.106243	0.488107	NaN	NaN	0.506621	0.490734	0.491062	0.42001			+									1.01e-13	174.72	10137000000	1	67.456	-0.53283	0.0371413	0.192721	0.0112167	1.00203	5	0.0374333	0.193477	-0.0066139	0.988082	5	0.04747	0.217876	-0.0690069	1.05113	5	0.0451113	0.212394	-0.125967	0.965986	5	0.773441	0.378568	0.812326
0.0669147	0.28108	-0.0537201	0.309024	NaN	NaN	0.873042	0.854644	0.825187	0.905031			+	+			+	+				8.49e-104	307.7	1632200000	1	307.7	-0.077679	0.0371413	0.192721	0.377637	1.36845	5	0.0374333	0.193477	0.357296	1.35199	5	0.04747	0.217876	0.265118	1.38526	5	0.0451113	0.212394	0.359054	1.45101	5	1.09375	0.792215	1.26911
0.0656357	0.223007	-0.358843	0.686023	NaN	NaN	0.629121	0.614647	1.22794	1.59711			+	+			+	+				6.14e-201	377.63	2482900000	1	231.09	-0.050897	0.0371413	0.192721	0.133717	1.12453	5	0.0374333	0.193477	0.117299	1.11199	5	0.04747	0.217876	0.667871	1.78801	5	0.0451113	0.212394	1.05113	2.14308	5	0.795409	0.488884	0.672077
0.06553	0.175922	-0.369439	1.17816	NaN	NaN	1.65778	1.63194	3.00022	3.36821			+	+			+	+				1.18e-156	358.05	10108000000	1	191.15	-0.030231	0.0371413	0.192721	1.16238	2.15319	5	0.0374333	0.193477	1.13459	2.12928	5	0.04747	0.217876	2.44015	3.56029	5	0.0451113	0.212394	2.82224	3.91419	5	2.0723	1.70985	2.13835
0.0652848	0.344613	0.194697	0.433633	NaN	NaN	0.753464	0.737933	3.12036	2.94791			+	+			+	+				2.27e-26	194.67	537400000	1	112.34	-0.46218	0.0371413	0.192721	0.25806	1.24887	5	0.0374333	0.193477	0.240585	1.23528	5	0.04747	0.217876	2.5603	3.68043	5	0.0451113	0.212394	2.40193	3.49389	5	0.941712	1.04331	0.795789
0.0625565	0.69768	0.0825603	0.981926	NaN	NaN	0.585323	0.574232	0.972228	0.920761			+	+			+	+				8.3e-216	385.89	1099800000	1	349.98	-0.12445	0.0371413	0.192721	0.0899189	1.08073	5	0.0374333	0.193477	0.0768839	1.07158	5	0.04747	0.217876	0.412159	1.5323	5	0.0451113	0.212394	0.374784	1.46674	5	0.612555	0.72045	0.676607
0.0625217	0.144677	-0.377658	0.89197	NaN	NaN	1.6095	1.47231	1.44008	1.64138			+	+			+	+				1.81e-62	249.41	417260000	1	249.41	0.22954	0.0371413	0.192721	1.11409	2.1049	5	0.0599863	0.244921	0.69286	2.25176	3	0.04747	0.217876	0.880014	2.00015	5	0.0730558	0.270288	0.781201	2.50156	3	2.27583	1.51676	1.94546
0.061974	0.165416	-0.0816576	0.260921	NaN	NaN	1.36502	1.40085	1.35816	1.47225			+	+			+	+				8.93e-06	121.68	113380000	1	118.77	-0.12638	0.0371413	0.192721	0.869617	1.86043	5	0.0599862	0.244921	0.621403	2.1803	3	0.04747	0.217876	0.798089	1.91823	5	0.0730557	0.270288	0.612077	2.33243	3	1.72814	1.56293	1.46162
0.0607934	0.0867211	-0.551976	1.25898	NaN	NaN	0.962357	0.948719	0.110571	0.671632			+	+				+				8.52e-30	218.12	6611200000	1	125.66	0.78049	0.0371413	0.192721	0.466953	1.45776	5	0.0374333	0.193477	0.451371	1.44607	5	0.04747	0.217876	-0.449497	0.67064	5	0.0451113	0.212394	0.125656	1.21761	5	0.999749	1.95471	1.05964
0.0599243	1.13915	0.0381153	0.281992	NaN	NaN	0.543179	0.535033	0.542827	0.536619			+	+								1.5e-20	186.51	11001000000	1	169.46	0.34666	0.0371413	0.192721	0.0477749	1.03858	5	0.0374333	0.193477	0.0376848	1.03238	5	0.04747	0.217876	-0.0172413	1.1029	5	0.0451113	0.212394	-0.00935722	1.0826	5	0.627694	0.713935	0.642382
0.0565163	0.464183	-0.103878	0.698794	NaN	NaN	0.764924	0.757509	1.00887	1.13553			+	+			+	+				4.17e-29	198.38	1604000000	1	198.38	-0.22648	0.0371413	0.192721	0.269519	1.26033	5	0.0374333	0.193477	0.260161	1.25486	5	0.04747	0.217876	0.448805	1.56894	5	0.0451113	0.212394	0.589552	1.6815	5	0.982671	0.930446	0.860938
0.0561865	0.248998	-0.0783793	0.186769	NaN	NaN	2.37142	2.3464	2.55575	2.64814			+	+			+	+				3.39e-37	240.94	42322000000	1	240.94	-0.56182	0.0371413	0.192721	1.87601	2.86682	5	0.0374333	0.193477	1.84905	2.84375	5	0.04747	0.217876	1.99568	3.11582	5	0.0451113	0.212394	2.10216	3.19412	5	2.53195	2.38669	2.52866
0.0520209	0.150523	-0.0179299	0.0429434	NaN	NaN	1.57967	1.5674	1.44448	1.48613			+	+			+	+				8.05e-137	338.73	1733800000	1	181.61	-0.12531	0.0371413	0.192721	1.08427	2.07508	5	0.0374333	0.193477	1.07005	2.06475	5	0.04747	0.217876	0.884413	2.00455	5	0.0451113	0.212394	0.940157	2.03211	5	1.71068	1.93346	1.24636
0.039251	0.0369072	0.353586	0.327655	NaN	NaN	1.138	1.13416	3.28944	3.0413			+	+			+	+				1.03e-74	261.46	624030000	1	226.08	0.97331	0.0371413	0.192721	0.642599	1.63341	5	0.0460981	0.214705	0.538044	1.73028	4	0.04747	0.217876	2.72937	3.8495	5	0.0557776	0.236173	2.38558	3.69702	4	1.55583	1.31999	1.92818
0.0385576	0.0930725	-0.0594103	0.310811	NaN	NaN	1.28365	1.28734	1.12211	1.2055			+	+			+	+				2.97e-36	218.56	2431700000	1	218.56	-0.43187	0.0371413	0.192721	0.788245	1.77905	5	0.0374333	0.193477	0.789988	1.78468	5	0.04747	0.217876	0.562038	1.68217	5	0.0451113	0.212394	0.659522	1.75148	5	1.38881	1.66409	1.29963
0.0383107	0.0718171	-0.0306055	0.0900787	NaN	NaN	1.45589	1.45788	1.34412	1.39854			+	+			+	+				9.98e-102	291.78	9708800000	1	94.777	0.25627	0.0371413	0.192721	0.960481	1.95129	5	0.0374333	0.193477	0.960535	1.95523	5	0.04747	0.217876	0.784048	1.90418	5	0.0451113	0.212394	0.852559	1.94451	5	1.37961	1.67938	1.22691
0.0357807	0.0519424	-0.32315	0.305775	NaN	NaN	1.50567	1.50949	1.48336	1.81675			+	+			+	+				4.81e-123	284.11	1492300000	1	245.47	-2.3445	0.0371413	0.192721	1.01027	2.00107	5	0.0374333	0.193477	1.01214	2.00684	5	0.04747	0.217876	0.923289	2.04343	5	0.0451113	0.212394	1.27077	2.36273	5	1.8686	0.913829	1.86417
0.0352884	0.0553454	0.0629408	0.174134	NaN	NaN	0.523884	0.539117	1.90334	1.8647			+	+			+	+				2.42e-205	391.86	5247000000	1	270.67	0.14449	0.0371413	0.192721	0.0284801	1.01929	5	0.0374333	0.193477	0.0417688	1.03646	5	0.04747	0.217876	1.34327	2.46341	5	0.0451113	0.212394	1.31872	2.41068	5	0.53567	0.287555	1.07265
0.0343422	0.192065	0.0592833	0.378226	NaN	NaN	1.46688	1.47249	2.11168	2.07521			+	+			+	+				4.09e-09	154	895860000	1	110.31	1.4869	0.0371413	0.192721	0.971475	1.96228	5	0.0374333	0.193477	0.975138	1.96983	5	0.04747	0.217876	1.55161	2.67175	5	0.0451113	0.212394	1.52923	2.62119	5	1.69819	1.61565	1.71455
0.0335369	0.0328684	-0.243671	0.355131	NaN	NaN	2.65989	2.65296	3.51171	3.75613			+	+			+	+				1.26e-47	245.4	100940000	1	75.911	-0.87425	0.0371413	0.192721	2.16449	3.1553	5	0.0374333	0.193477	2.15561	3.1503	5	0.04747	0.217876	2.95165	4.07178	5	0.0451113	0.212394	3.21015	4.3021	5	2.83206	3.24411	2.56055
0.032432	0.694439	-0.0964511	1.05494	NaN	NaN	0.512503	0.530548	0.404329	0.527738			+	+								1.68e-226	410.07	36068000000	1	94.639	-0.14735	0.0371413	0.192721	0.0170985	1.00791	5	0.0374333	0.193477	0.0331997	1.0279	5	0.04747	0.217876	-0.155739	0.964397	5	0.0451113	0.212394	-0.0182385	1.07371	5	0.665356	0.619764	0.647128
0.0322008	0.0851042	0.0570283	0.163531	NaN	NaN	1.15549	1.21145	1.50542	1.47385			+	+			+	+				1.9e-07	129.76	79424000	1	107.53	0.0083827	0.0458584	0.214146	0.560922	1.75005	4	0.0599863	0.244921	0.432003	1.9909	3	0.058782	0.24245	0.832268	2.17857	4	0.0730558	0.270288	0.613675	2.33403	3	1.47652	1.20159	1.55965
0.0309308	0.11235	-0.313888	1.00063	NaN	NaN	0.499558	0.519158	0.353703	0.685446			+	+				+				1.21e-11	163.71	2853500000	1	57.008	-0.22038	0.0371413	0.192721	0.00415323	0.994962	5	0.0374333	0.193477	0.0218102	1.01651	5	0.04747	0.217876	-0.206366	0.913771	5	0.0451113	0.212394	0.139469	1.23142	5	0.80761	0.472101	0.717628
0.0279956	0.141013	-0.0359291	0.193387	NaN	NaN	0.606544	0.627711	0.805067	0.86802			+	+			+	+				2.59e-17	184.55	1283700000	1	148.13	0.45357	0.0371413	0.192721	0.111139	1.10195	5	0.0374333	0.193477	0.130363	1.12506	5	0.04747	0.217876	0.244999	1.36514	5	0.0451113	0.212394	0.322043	1.414	5	0.744902	0.767046	0.793938
0.0235425	0.0424423	0.501057	0.688229	NaN	NaN	0.873581	0.715282	2.05298	1.71774			+				+	+				3.65e-19	175.66	48204000	1	155.37	-0.43778	0.0458584	0.214146	0.279017	1.46814	4	0.0858583	0.293016	-0.545463	1.97603	2	0.058782	0.24245	1.37983	2.72613	4	0.105854	0.325351	0.317868	3.11762	2	1.06891	NaN	0.89723
0.0232816	0.0554738	-0.137853	0.549351	NaN	NaN	1.40361	1.42033	1.86656	2.02024			+	+			+	+				6.23e-262	425.33	2666900000	1	238.19	1.4039	0.0371413	0.192721	0.90821	1.89902	5	0.0374333	0.193477	0.922978	1.91767	5	0.04747	0.217876	1.30649	2.42663	5	0.0451113	0.212394	1.47426	2.56622	5	1.62228	1.5594	1.69933
0.0195549	0.0329605	0.283796	0.279187	NaN	NaN	0.939869	0.965256	2.37055	2.11765			+	+			+	+				0	468.24	2808400000	1	446.5	-0.41241	0.0371413	0.192721	0.444465	1.43527	5	0.0374333	0.193477	0.467908	1.4626	5	0.04747	0.217876	1.81048	2.93062	5	0.0451113	0.212394	1.57167	2.66362	5	0.900064	1.11397	1.01705
0.0176376	0.033809	-0.466314	1.02666	NaN	NaN	0.635847	0.575688	1.25671	1.56859			+				+	+				5.39e-05	121.5	339440000	1	93.325	-0.63294	0.0371413	0.192721	0.140442	1.13125	5	0.0460981	0.214705	-0.0204281	1.1718	4	0.04747	0.217876	0.696641	1.81678	5	0.0557776	0.236173	0.912864	2.22431	4	1.12322	0.91826	0.487068
0.0152961	0.0113195	-0.463041	0.48044	NaN	NaN	0.612753	0.645791	0.919326	1.39014			+	+			+	+				2.19e-133	306.52	360680000	1	306.52	-0.72535	0.0371413	0.192721	0.117348	1.10816	5	0.0374333	0.193477	0.148444	1.14314	5	0.04747	0.217876	0.359257	1.47939	5	0.0451113	0.212394	0.844168	1.93612	5	1.07975	0.395055	1.45387
0.0143324	0.0417204	0.151256	0.287499	NaN	NaN	1.50553	1.52952	2.69899	2.57079			+	+			+	+				3.17e-35	202.79	787630000	1	196.41	-0.074419	0.0371413	0.192721	1.01012	2.00093	5	0.0374333	0.193477	1.03217	2.02687	5	0.04747	0.217876	2.13892	3.25906	5	0.0451113	0.212394	2.02481	3.11676	5	1.55261	1.32659	1.94196
0.000748008	0.00201967	0.0857698	0.38653	NaN	NaN	0.568167	0.615382	0.463423	0.412133			+	+								9.44e-50	213.13	346630000	1	213.13	-2.0749	0.0371413	0.192721	0.0727631	1.06357	5	0.0374333	0.193477	0.118034	1.11273	5	0.04747	0.217876	-0.0966456	1.02349	5	0.0451113	0.212394	-0.133843	0.95811	5	0.662305	0.551458	0.63933
-0.000303876	0.00133605	-0.105868	1.03671	NaN	NaN	0.841849	0.887001	0.164415	0.298364			+	+								1.17e-05	170.3	3630900000	1	146.58	-0.49747	0.0371413	0.192721	0.346445	1.33725	5	0.0374333	0.193477	0.389653	1.38435	5	0.04747	0.217876	-0.395654	0.724483	5	0.0451113	0.212394	-0.247613	0.84434	5	1.01487	0.936763	1.01645
-0.000339168	0.000680832	-0.0123586	0.0183351	NaN	NaN	0.836241	0.914905	2.14292	2.0723			+	+			+	+				1e-08	153.95	58680000	1	152.85	-0.21598	0.0371413	0.192721	0.340836	1.33165	5	0.0599863	0.244921	0.135457	1.69435	3	0.04747	0.217876	1.58285	2.70299	5	0.0730558	0.270288	1.21212	2.93248	3	0.908266	0.596615	1.05214
-0.00901346	0.0168081	-0.18053	0.330211	NaN	NaN	1.57293	1.61812	1.47371	1.67073			+	+			+	+				1.44e-72	271.64	1142500000	1	243.49	0.26721	0.0371413	0.192721	1.07752	2.06833	5	0.0374333	0.193477	1.12077	2.11547	5	0.04747	0.217876	0.913641	2.03378	5	0.0451113	0.212394	1.12475	2.2167	5	1.15906	1.65028	1.84505
-0.0140564	0.0599526	-0.0758773	0.360671	NaN	NaN	0.596681	0.657498	0.8489	0.949789			+	+			+	+				5.81e-21	179.46	244620000	1	179.46	0.12379	0.0371413	0.192721	0.101277	1.09209	5	0.0374333	0.193477	0.16015	1.15485	5	0.04747	0.217876	0.288831	1.40897	5	0.0451113	0.212394	0.403812	1.49577	5	0.678713	0.714331	0.753373
-0.0142988	0.0280261	-0.0704732	0.154752	NaN	NaN	1.46689	1.51823	2.72418	2.80793			+	+			+	+				0	559.85	1686000000	1	559.85	-0.42255	0.0371413	0.192721	0.971486	1.96229	5	0.0374333	0.193477	1.02088	2.01558	5	0.04747	0.217876	2.16411	3.28425	5	0.0451113	0.212394	2.26195	3.35391	5	1.7579	1.65791	1.51822
-0.0173779	0.0870145	-0.0245751	0.130623	NaN	NaN	0.623036	0.621367	0.525399	0.519832			+	+								1.43e-91	278.57	4286200000	1	260.24	-0.36716	0.0371413	0.192721	0.127632	1.11844	5	0.0460981	0.214705	0.0252512	1.21748	4	0.04747	0.217876	-0.0346698	1.08547	5	0.0557776	0.236173	-0.135889	1.17555	4	0.783513	0.756099	0.618679
-0.0175224	0.04278	-0.357099	0.400062	NaN	NaN	1.79752	1.84821	2.21571	2.57691			+	+			+	+				1.48e-08	149.3	1363900000	1	53.395	1.101	0.0371413	0.192721	1.30212	2.29293	5	0.0374333	0.193477	1.35086	2.34555	5	0.04747	0.217876	1.65564	2.77578	5	0.0451113	0.212394	2.03093	3.12289	5	2.04963	1.76866	2.35688
-0.0181936	0.0613987	-0.272416	2.33624	NaN	NaN	1.89367	1.94392	1.46615	1.75112			+	+			+	+				2.92e-06	148.91	457050000	1	83.883	-2.0597	0.0371413	0.192721	1.39827	2.38908	5	0.0374333	0.193477	1.44657	2.44127	5	0.04747	0.217876	0.906079	2.02622	5	0.0451113	0.212394	1.20514	2.29709	5	2.15385	2.21875	2.09867
-0.0193921	0.0558397	0.022882	0.0692038	NaN	NaN	1.36925	1.42646	1.34414	1.34739			+	+			+	+				0	626.1	9214600000	1	187.62	0.075565	0.0371413	0.192721	0.873841	1.86465	5	0.0374333	0.193477	0.929116	1.92381	5	0.04747	0.217876	0.784074	1.90421	5	0.0451113	0.212394	0.801416	1.89337	5	1.61197	1.45999	1.63877
-0.0207712	0.106955	-0.000238836	0.00130299	NaN	NaN	0.727697	0.793366	0.925649	0.95369			+	+			+	+				5.96e-137	337.35	9544300000	1	238.7	-1.8199	0.0371413	0.192721	0.232293	1.2231	5	0.0374333	0.193477	0.296018	1.29071	5	0.04747	0.217876	0.365581	1.48572	5	0.0451113	0.212394	0.407713	1.49967	5	1.04628	0.897315	0.824677
-0.0247385	0.440467	-0.141586	1.48136	NaN	NaN	0.974319	1.04097	0.527546	0.693346			+	+				+				4.24e-68	273.66	15428000000	1	209.83	0.080016	0.0371413	0.192721	0.478915	1.46972	5	0.0374333	0.193477	0.54362	1.53832	5	0.04747	0.217876	-0.0325225	1.08761	5	0.0451113	0.212394	0.14737	1.23932	5	1.112	1.05338	1.10952
-0.0264064	0.050384	-0.380547	1.90408	NaN	NaN	1.4887	1.55119	0.869591	1.26181			+	+			+	+				1.74e-35	223.58	2046800000	1	111.26	-0.85266	0.0371413	0.192721	0.9933	1.98411	5	0.0374333	0.193477	1.05384	2.04853	5	0.04747	0.217876	0.309523	1.42966	5	0.0451113	0.212394	0.715834	1.80779	5	1.65591	1.34082	1.93996
-0.0282038	0.0323985	0.327789	0.500902	NaN	NaN	1.55493	1.48346	3.07571	2.67703			+	+			+	+				1.99e-174	345.49	689120000	1	146.96	-1.5305	0.0371413	0.192721	1.05953	2.05033	5	0.0460981	0.214705	0.887348	2.07958	4	0.04747	0.217876	2.51564	3.63578	5	0.0557776	0.236173	2.0213	3.33275	4	1.62891	1.89622	1.23968
-0.0324593	0.0472985	0.0112108	0.0229807	NaN	NaN	0.757852	0.834175	1.30793	1.32258			+	+			+	+				1.17e-132	342.48	19932000000	1	83.614	2.7956	0.0371413	0.192721	0.262448	1.25326	5	0.0374333	0.193477	0.336827	1.33152	5	0.04747	0.217876	0.747861	1.868	5	0.0451113	0.212394	0.7766	1.86855	5	1.40108	1.15316	0.511228
-0.0329398	0.0603072	0.0851754	0.161988	NaN	NaN	1.36694	1.43692	1.58134	1.52349			+	+			+	+				5.32e-11	131.13	391170000	1	129.8	-0.053878	0.0371413	0.192721	0.871536	1.86235	5	0.0374333	0.193477	0.939575	1.93427	5	0.04747	0.217876	1.02127	2.14141	5	0.0451113	0.212394	0.97751	2.06946	5	1.70414	1.51354	1.85405
-0.0368639	0.0622873	-0.240097	0.733106	NaN	NaN	1.22059	1.34819	1.0947	1.2852			+	+			+	+				3.53e-28	201.65	266830000	1	201.65	-0.58814	0.0371413	0.192721	0.725184	1.71599	5	0.0460981	0.214705	0.75207	1.9443	4	0.04747	0.217876	0.53463	1.65477	5	0.0557777	0.236173	0.629475	1.94092	4	1.61204	1.24447	1.4108
-0.0380727	0.131352	0.101622	0.223318	NaN	NaN	0.774179	0.855597	0.778509	0.710043			+	+			+	+				1.79e-235	395.88	5660100000	1	247.85	-0.72675	0.0371413	0.192721	0.278775	1.26958	5	0.0374333	0.193477	0.358249	1.35295	5	0.04747	0.217876	0.21844	1.33858	5	0.0451113	0.212394	0.164067	1.25602	5	0.950527	0.686975	0.850522
-0.038236	0.203644	-0.395724	0.460984	NaN	NaN	0.999256	1.07832	1.33364	1.73742			+	+			+	+				1.67e-10	168.69	345790000	1	150.04	-0.43558	0.0371413	0.192721	0.503852	1.49466	5	0.0374333	0.193477	0.58097	1.57567	5	0.04747	0.217876	0.773575	1.89371	5	0.0451113	0.212394	1.19144	2.2834	5	1.15214	1.1275	1.07896
-0.038931	0.0393783	-0.0269558	0.0169485	NaN	NaN	0.603343	0.516228	1.12495	1.09959			+				+	+				2.94e-125	311.77	1594300000	1	266.53	0.96394	0.0371413	0.192721	0.107939	1.09875	5	0.0460981	0.214705	-0.0798879	1.11234	4	0.04747	0.217876	0.564882	1.68502	5	0.0557777	0.236173	0.443866	1.75531	4	0.916477	0.349183	1.24074
-0.0417888	0.0792253	0.119544	0.193806	NaN	NaN	0.74074	0.826025	0.934867	0.848258			+	+			+	+				9.68e-48	233.9	27446000000	1	99.055	-1.0909	0.0371413	0.192721	0.245336	1.23614	5	0.0374333	0.193477	0.328677	1.32337	5	0.04747	0.217876	0.374798	1.49494	5	0.0451113	0.212394	0.302282	1.39423	5	0.978178	0.982959	0.401722
-0.0461232	0.0324611	0.756799	0.589953	NaN	NaN	0.708391	0.798112	1.61591	0.915328			+	+			+	+				0.00054402	95.775	7835600000	1	80.986	0.90219	0.0371413	0.192721	0.212987	1.2038	5	0.0374333	0.193477	0.300764	1.29546	5	0.04747	0.217876	1.05584	2.17598	5	0.0451113	0.212394	0.369351	1.4613	5	1.37636	0.989897	-0.581501
-0.0463227	0.043615	0.115797	0.118739	NaN	NaN	0.695041	1.09622	0.50379	0.65116			+	+								2.06e-46	233.02	218520000	1	233.02	0.23317	0.0458584	0.214146	0.100477	1.2896	4	0.0599861	0.244921	0.316768	1.87566	3	0.058782	0.24245	-0.169359	1.17694	4	0.0730556	0.270288	-0.209017	1.51134	3	0.68223	0.619655	1.60751
-0.0473611	0.110115	-0.0716583	0.49796	NaN	NaN	0.547985	0.640659	1.28338	1.37746			+	+			+	+				4.42e-129	289.8	8718500000	1	253.34	0.173	0.0371413	0.192721	0.0525812	1.04339	5	0.0374333	0.193477	0.143311	1.13801	5	0.04747	0.217876	0.723316	1.84345	5	0.0451113	0.212394	0.831488	1.92344	5	0.676857	0.790102	0.981203
-0.0506261	0.129237	-0.186665	0.424942	NaN	NaN	0.618093	0.713055	1.55333	1.75571			+	+			+	+				5.95e-180	358.88	2242500000	1	314.43	0.33158	0.0371413	0.192721	0.122689	1.1135	5	0.0374333	0.193477	0.215707	1.2104	5	0.04747	0.217876	0.993258	2.1134	5	0.0451113	0.212394	1.20973	2.30168	5	1.14534	0.991891	0.586839
-0.051069	0.0407257	0.142117	0.438456	NaN	NaN	0.66997	0.68799	1.19526	1.1338			+	+			+	+				3.64e-19	131.99	50120000	1	117.66	-0.75172	0.0458584	0.214146	0.0754059	1.26453	4	0.0460981	0.214705	0.0918741	1.28411	4	0.0587819	0.24245	0.522116	1.86841	4	0.0557777	0.236173	0.478078	1.78952	4	0.829805	0.498987	1.30355
-0.0514219	0.0820714	-0.122506	0.396402	NaN	NaN	0.823627	0.917045	0.70409	0.850511			+	+			+	+				5.19e-104	308.2	15991000000	1	54.047	1.445	0.0371413	0.192721	0.328223	1.31903	5	0.0374333	0.193477	0.419697	1.41439	5	0.04747	0.217876	0.144022	1.26416	5	0.0451113	0.212394	0.304535	1.39649	5	1.48241	1.15052	0.513055
-0.0516601	0.0992862	-0.389958	0.390438	NaN	NaN	0.931675	1.02411	2.72153	3.11093			+	+			+	+				0	596.07	11544000000	1	506.26	0.82004	0.0371413	0.192721	0.436271	1.42708	5	0.0374333	0.193477	0.526764	1.52146	5	0.04747	0.217876	2.16146	3.2816	5	0.0451113	0.212394	2.56495	3.65691	5	0.999183	0.90839	1.41091
-0.0522221	0.159373	-0.024001	0.0520782	NaN	NaN	1.9492	2.03082	2.51214	2.55279			+	+			+	+				1.2e-40	252.69	16017000000	1	160.61	-0.51395	0.0371413	0.192721	1.4538	2.44461	5	0.0374333	0.193477	1.53348	2.52817	5	0.04747	0.217876	1.95207	3.07221	5	0.0451113	0.212394	2.00681	3.09876	5	2.07992	2.01957	2.33544
-0.0560523	0.139648	-0.377472	1.1472	NaN	NaN	1.19364	1.28728	0.897753	1.28685			+	+			+	+				5.23e-05	126.39	374470000	1	117.02	-0.80326	0.0371413	0.192721	0.698233	1.68904	5	0.0374333	0.193477	0.789935	1.78463	5	0.04747	0.217876	0.337685	1.45782	5	0.0451113	0.212394	0.740874	1.83283	5	1.75851	1.52708	0.992557
-0.056933	0.193469	-0.000985003	0.00245749	NaN	NaN	1.30263	1.39589	1.34661	1.37268			+	+			+	+				1.73e-92	293.47	13088000000	1	59.122	0.2801	0.0371413	0.192721	0.807229	1.79804	5	0.0374333	0.193477	0.898544	1.89324	5	0.04747	0.217876	0.786543	1.90668	5	0.0451113	0.212394	0.826701	1.91865	5	1.47617	1.24687	1.65316
-0.0573627	0.156536	-0.304012	1.29142	NaN	NaN	1.08599	1.18207	0.867083	1.1861			+	+			+	+				4.74e-10	149.49	1604600000	1	149.49	-0.08625	0.0371413	0.192721	0.590585	1.58139	5	0.0374333	0.193477	0.68472	1.67942	5	0.04747	0.217876	0.307015	1.42715	5	0.0451113	0.212394	0.640125	1.73208	5	1.44556	1.32045	1.36688
-0.0649643	0.0552005	-0.310585	0.315932	NaN	NaN	1.10552	1.20852	1.11549	1.43921			+	+			+	+				1.19e-58	244.23	22209000000	1	181.23	-1.7051	0.0371413	0.192721	0.610112	1.60092	5	0.0374333	0.193477	0.711176	1.70587	5	0.04747	0.217876	0.555417	1.67555	5	0.0451113	0.212394	0.893229	1.98518	5	0.976353	2.383	0.987543
-0.0662886	0.295667	-0.715589	2.34765	NaN	NaN	1.57382	1.67285	0.967598	1.67971			+	+		+	+	+				3.15e-45	244.47	143880000000	1	233.7	-0.69872	0.0371413	0.192721	1.07841	2.06922	5	0.0374333	0.193477	1.1755	2.17019	5	0.04747	0.217876	0.40753	1.52767	5	0.0451113	0.212394	1.13373	2.22569	5	1.77252	1.62889	1.63009
-0.068606	0.378893	-0.185036	0.79296	NaN	NaN	0.570821	0.683216	1.06767	1.27159			+	+			+	+				2.77e-105	277.67	3159200000	1	261.94	-0.2503	0.0371413	0.192721	0.0754168	1.06623	5	0.0374333	0.193477	0.185868	1.18056	5	0.04747	0.217876	0.507598	1.62774	5	0.0451113	0.212394	0.725609	1.81756	5	0.606564	0.688477	0.585918
-0.0708898	0.199452	0.277133	1.22166	NaN	NaN	1.03288	1.14227	1.96773	1.72378			+	+			+	+				0.0021508	87.806	666890000	1	50.194	0.20489	0.0371413	0.192721	0.537481	1.52829	5	0.0374333	0.193477	0.644926	1.63962	5	0.04747	0.217876	1.40767	2.5278	5	0.0451113	0.212394	1.1778	2.26975	5	1.32237	1.15469	1.10626
-0.0755757	0.0910961	0.0283289	0.136743	NaN	NaN	1.19014	1.30219	2.06433	2.05777			+	+			+	+				0	482.03	7888500000	1	414.11	-0.03606	0.0371413	0.192721	0.69474	1.68555	5	0.0374333	0.193477	0.804838	1.79953	5	0.04747	0.217876	1.50426	2.6244	5	0.0451113	0.212394	1.51179	2.60375	5	1.54116	1.03996	1.55348
-0.0759767	0.26611	-0.0998254	0.155529	NaN	NaN	0.590176	0.709285	0.501192	0.627211			+	+				+				3.48e-67	264.97	3775600000	1	264.97	-1.1025	0.0371413	0.192721	0.0947721	1.08558	5	0.0374333	0.193477	0.211937	1.20663	5	0.04747	0.217876	-0.0588764	1.06126	5	0.0451113	0.212394	0.0812343	1.17319	5	0.485583	0.767192	0.989928
-0.0769936	0.628423	0.251516	2.01978	NaN	NaN	0.850717	0.967876	1.1951	0.980582			+	+			+	+				2.71e-09	138.63	7533900000	1	114.72	0.05801	0.0371413	0.192721	0.355313	1.34612	5	0.0374333	0.193477	0.470529	1.46522	5	0.04747	0.217876	0.635035	1.75517	5	0.0451113	0.212394	0.434606	1.52656	5	0.983139	0.97153	1.0959
-0.0770439	0.0831431	-0.887005	0.762604	NaN	NaN	1.24256	1.35539	-0.674827	0.211752			+	+			-					3.87e-16	183.52	3155200000	1	183.52	0.27889	0.0371413	0.192721	0.747153	1.73796	5	0.0374333	0.193477	0.858047	1.85274	5	0.04747	0.217876	-1.2349	-0.114759	5	0.0451113	0.212394	-0.334224	0.757729	5	0.832391	1.48148	1.25418
-0.0789366	0.212312	-0.0818511	0.333113	NaN	NaN	0.683826	0.817228	0.798602	0.920893			+	+			+	+				2.06e-05	113.22	97857000	1	112.94	-0.61408	0.0458584	0.214146	0.0892626	1.27839	4	0.0374333	0.193477	0.31988	1.31458	5	0.0587819	0.24245	0.125454	1.47175	4	0.0451113	0.212394	0.374916	1.46687	5	0.776787	0.609603	0.790051
-0.0811193	0.073249	-0.460502	0.42549	NaN	NaN	1.59361	1.70637	2.19869	2.65892			+	+			+	+				1.29e-60	258.91	2912200000	1	228.03	0.65391	0.0371413	0.192721	1.09821	2.08902	5	0.0374333	0.193477	1.20902	2.20372	5	0.04747	0.217876	1.63862	2.75876	5	0.0451113	0.212394	2.11294	3.20489	5	0.542161	1.65248	3.01489
-0.0869971	0.0974451	0.138441	0.207554	NaN	NaN	0.637038	1.00878	1.02484	1.32556			+				+					0.0032412	95.483	81100000	1	95.483	-0.29679	0.0458584	0.214146	0.0424738	1.2316	4	0.0858583	0.293016	-0.251969	2.26952	2	0.058782	0.24245	0.351693	1.69799	4	0.105854	0.325352	-0.0743118	2.72544	2	0.90106	0.826829	NaN
-0.0881329	0.105593	0.0799382	0.261612	NaN	NaN	1.99352	2.10841	2.64719	2.58754			+	+			+	+				4.09e-26	225.22	986110000	1	225.22	0.52462	0.0371413	0.192721	1.49812	2.48893	5	0.0374333	0.193477	1.61106	2.60576	5	0.04747	0.217876	2.08712	3.20725	5	0.0451113	0.212394	2.04156	3.13351	5	2.41329	2.14029	2.10642
-0.090233	0.564408	-0.474841	6.12369	NaN	NaN	1.57188	1.69344	0.992118	1.47376			+	+		+	+	+				2.8e-101	270.39	28919000000	1	99.222	1.8676	0.0371413	0.192721	1.07647	2.06728	5	0.0374333	0.193477	1.1961	2.19079	5	0.04747	0.217876	0.43205	1.55219	5	0.0451113	0.212394	0.927785	2.01974	5	1.7494	1.79532	1.57983
-0.0903246	0.368596	-0.145732	0.851718	NaN	NaN	0.748995	0.879823	1.58302	1.74605			+	+			+	+				5.24e-91	266.4	1390700000	1	239.55	-0.49429	0.0371413	0.192721	0.253591	1.2444	5	0.0374333	0.193477	0.382475	1.37717	5	0.04747	0.217876	1.02295	2.14309	5	0.0451113	0.212394	1.20008	2.29203	5	0.978826	0.902262	0.970604
-0.0918251	0.0568039	-0.5804	1.39672	NaN	NaN	0.711428	0.856976	-0.587716	0.00754657			+	+								0.00215761	84.896	257880000	1	52.735	-0.13334	0.0458584	0.214146	0.116864	1.30599	4	0.0374333	0.193477	0.359628	1.35432	5	0.0587819	0.24245	-1.26087	0.0854323	4	0.0451113	0.212394	-0.53843	0.553523	5	0.605895	2.57746	0.128992
-0.0948641	1.20626	-0.0733341	1.02534	NaN	NaN	0.587152	0.724053	0.580348	0.680518			+	+			+	+				1.94e-30	219.89	32765000000	1	102.63	-0.34281	0.0371413	0.192721	0.0917476	1.08256	5	0.0374333	0.193477	0.226705	1.2214	5	0.04747	0.217876	0.0202792	1.14042	5	0.0451113	0.212394	0.134542	1.22649	5	0.59501	0.710387	0.717459
-0.0978411	0.303284	0.543434	2.84803	NaN	NaN	0.909623	1.04573	0.771933	0.28085			+	+	++	+	+					4.04e-35	210.64	1849500000	1	203.87	0.60091	0.0371413	0.192721	0.414219	1.40503	5	0.0374333	0.193477	0.548379	1.54308	5	0.04747	0.217876	0.211865	1.332	5	0.0451113	0.212394	-0.265126	0.826827	5	0.759041	1.12664	0.909475
-0.0995033	0.316404	-0.283958	1.70076	NaN	NaN	0.815647	0.954363	0.0642173	0.369176			+	+								2.87e-21	190.03	9798300000	1	176.58	-0.483	0.0371413	0.192721	0.320243	1.31105	5	0.0374333	0.193477	0.457015	1.45171	5	0.04747	0.217876	-0.495851	0.624286	5	0.0451113	0.212394	-0.176801	0.915152	5	0.811665	0.883923	0.971169
-0.106098	0.341808	-0.064602	0.252528	NaN	NaN	1.2041	1.2774	1.23587	1.25948			+	+			+	+				2e-32	200.88	230360000	1	197.17	-1.8796	0.0371413	0.192721	0.708694	1.6995	5	0.0460981	0.214705	0.681287	1.87352	4	0.04747	0.217876	0.675801	1.79594	5	0.0557777	0.236173	0.60376	1.9152	4	1.38707	1.3201	1.57797
-0.109758	0.161552	0.153881	0.193098	NaN	NaN	0.731162	0.634169	1.08844	1.12993			+				+					2.66e-10	120.13	55027000	1	120.13	-0.37304	0.0458584	0.214146	0.136598	1.32573	4	0.150995	0.388581	-4.30322	5.57156	1	0.058782	0.24245	0.415296	1.76159	4	0.192129	0.438325	-4.43952	6.69938	1	NaN	0.516395	0.576331
-0.110081	0.161269	-0.245043	0.594776	NaN	NaN	1.12155	1.47679	1.53464	1.68231			+	+			+	+				0.000206326	125.97	51906000	1	125.97	-0.14164	0.0599259	0.244798	0.342499	1.90061	3	0.0599863	0.244921	0.697343	2.25624	3	0.077179	0.277811	0.650523	2.41876	3	0.0730558	0.270288	0.822133	2.54249	3	NaN	NaN	1.34599
-0.111199	0.046094	-0.437415	0.433295	NaN	NaN	0.602492	0.756147	0.220291	0.663147			+	+				+				2e-10	161.28	856880000	1	158.08	0.77097	0.0458584	0.214146	0.00792771	1.19706	4	0.0374333	0.193477	0.258799	1.25349	5	0.058782	0.24245	-0.452858	0.89344	4	0.0451113	0.212394	0.11717	1.20912	5	NaN	-0.119163	-0.0546503
-0.114147	0.234854	-0.763919	1.00802	NaN	NaN	1.9254	2.0655	1.49143	2.24643			+	+			+	+				7.63e-29	208.27	379810000	1	200.21	-0.16105	0.0371413	0.192721	1.42999	2.4208	5	0.0374333	0.193477	1.56816	2.56285	5	0.04747	0.217876	0.931358	2.0515	5	0.0451113	0.212394	1.70045	2.7924	5	2.05187	1.87934	2.07611
-0.120562	0.592967	-0.104245	0.201473	NaN	NaN	0.854752	1.01283	0.957548	1.08488			+	+			+	+				3.92e-31	180.71	990850000	1	164.01	-0.23362	0.0371413	0.192721	0.359348	1.35016	5	0.0374333	0.193477	0.515483	1.51018	5	0.04747	0.217876	0.39748	1.51762	5	0.0451113	0.212394	0.538905	1.63086	5	1.09292	1.23766	0.893623
-0.123001	0.0707365	0.08425	0.0745036	NaN	NaN	1.28499	1.4848	1.15954	1.11532			+	+			+	+				4.96e-69	231.9	2748200000	1	81.338	0.20669	0.0371413	0.192721	0.789587	1.7804	5	0.0460981	0.214705	0.888687	2.08092	4	0.04747	0.217876	0.59947	1.71961	5	0.0557777	0.236173	0.459595	1.77104	4	0.964544	2.29871	0.683933
-0.124005	2.13187	-0.312541	3.37093	NaN	NaN	0.904844	1.0656	0.728189	1.05625			+	+			+	+				5.39e-232	384.23	8878100000	1	384.23	0.19359	0.0371413	0.192721	0.409439	1.40025	5	0.0374333	0.193477	0.568253	1.56295	5	0.04747	0.217876	0.16812	1.28826	5	0.0451113	0.212394	0.510276	1.60223	5	1.06311	1.12304	1.03593
-0.126861	0.182976	-0.0479517	0.0567816	NaN	NaN	0.654751	0.820983	1.45789	1.52818			+	+			+	+				2.65e-31	185.18	4054200000	1	61.523	0.79829	0.0371413	0.192721	0.159347	1.15016	5	0.0374333	0.193477	0.323635	1.31833	5	0.04747	0.217876	0.897825	2.01796	5	0.0451113	0.212394	0.982204	2.07416	5	0.475507	1.29629	0.907612
-0.128068	0.600857	0.216196	0.257667	NaN	NaN	0.496226	0.665361	1.59391	1.41063			+	+			+	+				7.94e-32	179.8	971760000	1	162.81	0.95056	0.0371413	0.192721	0.000821779	0.99163	5	0.0374333	0.193477	0.168013	1.16271	5	0.04747	0.217876	1.03384	2.15398	5	0.0451113	0.212394	0.864658	1.95661	5	0.376078	0.639689	0.546183
-0.130917	0.332948	0.141534	0.370563	NaN	NaN	1.39006	1.59749	1.72948	1.67513			+	+			+	+				9.89e-10	138.66	291090000	1	132.83	1.9844	0.0599259	0.244798	0.611001	2.16911	3	0.0374333	0.193477	1.10014	2.09483	5	0.0771789	0.277811	0.845361	2.6136	3	0.0451113	0.212394	1.12916	2.22111	5	1.71287	1.28682	NaN
-0.135029	0.197251	-0.0230085	0.0333922	NaN	NaN	1.15451	0.728997	0.568563	0.343164			+									4.83e-165	367.45	37267000	1	204.21	-0.66825	0.0599259	0.244798	0.375451	1.93356	3	0.150996	0.388582	-4.2084	5.6664	1	0.077179	0.277811	-0.315556	1.45268	3	0.19213	0.438326	-5.2263	5.91263	1	NaN	NaN	1.00756
-0.148465	0.646691	0.0122902	0.0188732	NaN	NaN	0.504364	0.692586	0.487711	0.50656			+	+								7.44e-88	287.07	5225900000	1	105.39	0.33638	0.0371413	0.192721	0.00895998	0.999769	5	0.0374333	0.193477	0.195238	1.18993	5	0.04747	0.217876	-0.0723577	1.04778	5	0.0451113	0.212394	-0.0394162	1.05254	5	0.748968	0.6731	0.362967
-0.152271	0.247869	-2.32393	2.05482	NaN	NaN	1.00015	1.03923	-0.771501	1.51711			+	+		+	-	+				3.01e-112	305.63	776030000	1	226.44	2.9957	0.0371413	0.192721	0.50475	1.49556	5	0.0460981	0.214705	0.443111	1.63534	4	0.04747	0.217876	-1.33157	-0.211433	5	0.0557777	0.236173	0.861392	2.17283	4	1.50221	1.69973	0.689383
-0.156127	0.0846703	-0.441445	0.564781	NaN	NaN	0.811427	1.00343	0.231151	0.685703			+	+				+				2.41e-101	285.45	1680500000	1	234.48	-0.29296	0.0371413	0.192721	0.316023	1.30683	5	0.0374333	0.193477	0.506081	1.50078	5	0.04747	0.217876	-0.328917	0.791219	5	0.0451113	0.212394	0.139726	1.23168	5	1.38625	0.990948	1.20267
-0.157575	0.55485	0.012766	0.0346716	NaN	NaN	0.783117	0.901394	0.733645	0.720044			+	+				+				0.000929413	76.655	272190000	1	40.352	0.96664	0.0599259	0.244798	0.00406091	1.56217	3	0.0460981	0.214705	0.305278	1.49751	4	0.077179	0.277811	-0.150473	1.61776	3	0.0557777	0.236173	0.0643222	1.37576	4	NaN	NaN	0.867914
-0.15914	0.343357	-0.397596	1.46452	NaN	NaN	0.970997	1.16405	2.29516	2.69459			+	+			+	+				0.000199811	108.43	316400000	1	108.43	0.40778	0.0371413	0.192721	0.475593	1.4664	5	0.0374333	0.193477	0.666705	1.6614	5	0.04747	0.217876	1.73509	2.85523	5	0.0451113	0.212394	2.14861	3.24057	5	1.02908	1.24666	0.855427
-0.163094	1.77008	-0.101659	0.951716	NaN	NaN	0.740857	0.940196	1.03163	1.15601			+	+			+	+				2.31e-21	190.37	505480000	1	171.76	-0.28551	0.0371413	0.192721	0.245452	1.23626	5	0.0374333	0.193477	0.442848	1.43754	5	0.04747	0.217876	0.471559	1.5917	5	0.0451113	0.212394	0.610037	1.70199	5	0.992664	0.866796	0.824895
-0.163441	1.75424	-0.348238	4.19919	NaN	NaN	0.756197	0.955691	0.320041	0.684859			+	+		+		+				5.17e-06	144.77	2479100000	1	114.45	0.35305	0.0371413	0.192721	0.260792	1.2516	5	0.0374333	0.193477	0.458343	1.45304	5	0.04747	0.217876	-0.240028	0.880109	5	0.0451113	0.212394	0.138883	1.23084	5	0.994421	0.835794	0.944914
-0.164363	0.187583	0.192742	1.04441	NaN	NaN	0.683696	0.884866	0.105397	-0.0459413			+	+								1.37e-05	133.49	3024200000	1	92.247	-0.079796	0.0371413	0.192721	0.188292	1.1791	5	0.0374333	0.193477	0.387518	1.38221	5	0.04747	0.217876	-0.454671	0.665466	5	0.0451113	0.212394	-0.591918	0.500035	5	0.879714	0.395058	0.768359
-0.166968	0.589942	-0.280644	1.47741	NaN	NaN	1.6813	1.87379	2.15993	2.44834			+	+			+	+				3.81e-31	225.58	5159700000	1	197.85	-0.71854	0.0371413	0.192721	1.18589	2.1767	5	0.0374333	0.193477	1.37644	2.37114	5	0.04747	0.217876	1.59987	2.72	5	0.0451113	0.212394	1.90237	2.99432	5	1.78997	1.81318	1.92623
-0.174015	0.0819236	0.824085	0.39024	NaN	NaN	0.693821	0.903953	2.18861	1.42			+	+			+	+				5.73e-112	314.11	1545800000	1	246.18	0.056416	0.0371413	0.192721	0.198417	1.18923	5	0.0374333	0.193477	0.406605	1.4013	5	0.04747	0.217876	1.62855	2.74868	5	0.0451113	0.212394	0.874027	1.96598	5	1.18181	0.498789	-0.220184
-0.178108	0.378562	-0.539951	1.75875	NaN	NaN	0.659739	0.8741	1.1056	1.64881			+	+			+	+				2.45e-36	224.13	849550000	1	138.97	1.2357	0.0371413	0.192721	0.164335	1.15514	5	0.0374333	0.193477	0.376752	1.37145	5	0.04747	0.217876	0.545533	1.66567	5	0.0451113	0.212394	1.10283	2.19478	5	0.981636	0.790597	0.779763
-0.186844	0.237262	-0.531183	0.919073	NaN	NaN	1.17411	1.34901	2.36656	2.82638			+	+			+	+				2.83e-33	224.8	1696900000	1	90.975	-1.9307	0.0371413	0.192721	0.678703	1.66951	5	0.0460981	0.214705	0.752897	1.94513	4	0.04747	0.217876	1.8065	2.92663	5	0.0557776	0.236173	2.17066	3.4821	4	2.01631	0.483158	1.31079
-0.188047	0.106046	0.308894	0.904869	NaN	NaN	1.23744	1.47091	0.0274159	-0.240138			+	+								7.99e-06	133.44	907490000	1	50.088	-2.6609	0.0458584	0.214146	0.642875	1.832	4	0.0374333	0.193477	0.973559	1.96826	5	0.058782	0.24245	-0.645733	0.700565	4	0.0451113	0.212394	-0.786115	0.305838	5	1.72212	NaN	1.34054
-0.189543	0.180684	-0.0295562	0.0735576	NaN	NaN	1.27566	1.49391	1.8161	1.86651			+	+			+	+				8.3e-48	228.76	7458800000	1	187.04	-0.1676	0.0371413	0.192721	0.780257	1.77107	5	0.0374333	0.193477	0.996558	1.99125	5	0.04747	0.217876	1.25604	2.37617	5	0.0451113	0.212394	1.32053	2.41248	5	1.20329	1.46138	1.39686
-0.198611	0.920242	-0.307427	1.66076	NaN	NaN	0.618387	0.755796	0.855246	1.19039			+	+			+	+				0.00127217	109.71	929370000	1	90.601	-0.65173	0.0371413	0.192721	0.122983	1.11379	5	0.0460981	0.214705	0.159681	1.35191	4	0.04747	0.217876	0.295177	1.41531	5	0.0557776	0.236173	0.534665	1.84611	4	0.760875	0.662685	0.747654
-0.198954	0.728622	-0.025196	0.0857787	NaN	NaN	1.11957	1.34841	1.38615	1.43513			+	+			+	+				9.5e-05	118.71	559030000	1	96.143	0.3261	0.0371413	0.192721	0.62417	1.61498	5	0.0374333	0.193477	0.85106	1.84576	5	0.04747	0.217876	0.826083	1.94622	5	0.0451113	0.212394	0.88915	1.9811	5	1.32538	1.23268	1.46742
-0.200072	0.15541	-0.00594903	0.00673981	NaN	NaN	1.57439	1.82719	1.62513	1.6525			+	+			+	+				9.23e-125	300.67	155330000	1	300.67	0.054656	0.0599259	0.244798	0.795332	2.35344	3	0.0460981	0.214705	1.23107	2.42331	4	0.077179	0.277811	0.741011	2.50925	3	0.0557776	0.236173	0.996779	2.30822	4	NaN	NaN	1.83442
-0.206493	0.308008	-0.290609	0.839224	NaN	NaN	0.746765	0.986845	1.42881	1.73142			+	+			+	+				1.66e-39	225.37	391520000	1	225.37	-0.41759	0.0371413	0.192721	0.251361	1.24217	5	0.0374333	0.193477	0.489497	1.48419	5	0.04747	0.217876	0.868745	1.98888	5	0.0451113	0.212394	1.18545	2.2774	5	1.29551	0.299505	0.872487
-0.206666	0.348036	-0.018094	0.0496512	NaN	NaN	0.67845	0.919454	0.71923	0.765669			+	+			+	+				9.53e-15	185.84	14639000000	1	51.829	0.23236	0.0371413	0.192721	0.183046	1.17385	5	0.0374333	0.193477	0.422106	1.4168	5	0.04747	0.217876	0.159162	1.2793	5	0.0451113	0.212394	0.219692	1.31165	5	1.4758	0.890781	0.745589
-0.208282	0.432279	-0.140029	0.167159	NaN	NaN	0.576723	0.820381	0.244794	0.41091			+	+								1.94e-231	398.19	3601200000	1	386.42	0.92163	0.0371413	0.192721	0.081319	1.07213	5	0.0374333	0.193477	0.323033	1.31773	5	0.04747	0.217876	-0.315274	0.804863	5	0.0451113	0.212394	-0.135066	0.956887	5	0.703831	0.184341	0.827115
-0.212074	1.89118	-0.633678	3.94018	NaN	NaN	0.743853	0.989213	0.789465	1.42435			+	+		+	+	+				1.4e-201	387.14	7082300000	1	208.72	0.22037	0.0371413	0.192721	0.248449	1.23926	5	0.0374333	0.193477	0.491865	1.48656	5	0.04747	0.217876	0.229397	1.34953	5	0.0451113	0.212394	0.878377	1.97033	5	0.904903	0.864817	0.876255
-0.219599	0.31445	-0.533032	1.33981	NaN	NaN	2.18453	2.37012	3.5308	3.9971			+	+			+	+				4.95e-68	247.89	752960000	1	66.012	-0.64453	0.0371413	0.192721	1.68913	2.67994	5	0.0460981	0.214705	1.77401	2.96624	4	0.04747	0.217876	2.97073	4.09087	5	0.0557776	0.236173	3.34138	4.65282	4	2.93784	2.2975	3.05239
-0.224031	0.210422	-0.560114	0.964866	NaN	NaN	0.61476	0.872802	-0.617992	-0.0444949			+	+			-					1.99e-06	132.55	906290000	1	132.55	-0.15877	0.0371413	0.192721	0.119356	1.11016	5	0.0374333	0.193477	0.375454	1.37015	5	0.04747	0.217876	-1.17806	-0.0579231	5	0.0451113	0.212394	-0.590471	0.501482	5	0.396104	0.507945	0.613776
-0.226591	0.218699	-0.209391	0.772584	NaN	NaN	2.14818	2.33872	-0.104905	0.1887			+	+								1.62e-49	235.35	688430000	1	235.35	0.82511	0.0371413	0.192721	1.65278	2.64358	5	0.0460981	0.214705	1.7426	2.93483	4	0.04747	0.217876	-0.664974	0.455163	5	0.0557777	0.236173	-0.467022	0.844421	4	2.35651	1.76516	2.37842
-0.231668	0.558566	0.054457	0.102829	NaN	NaN	0.846419	1.10906	0.418785	0.397736			+	+								4.62e-28	206.49	2049500000	1	206.49	-0.49395	0.0371413	0.192721	0.351015	1.34182	5	0.0374333	0.193477	0.61171	1.60641	5	0.04747	0.217876	-0.141283	0.978853	5	0.0451113	0.212394	-0.148241	0.943712	5	0.869985	1.21164	1.14006
-0.238646	0.987935	-0.303627	2.37982	NaN	NaN	0.652592	0.923953	-0.874444	-0.544678			+	+			-					0.000418763	123.86	1935400000	1	54.27	-0.82202	0.0371413	0.192721	0.157188	1.148	5	0.0374333	0.193477	0.426605	1.4213	5	0.04747	0.217876	-1.43451	-0.314376	5	0.0451113	0.212394	-1.09065	0.00129812	5	0.718953	0.673034	0.701912
-0.255135	0.167365	-0.801632	0.531322	NaN	NaN	0.508254	0.796728	0.930558	1.72522			+	+			+	+				1.57e-32	199.15	815130000	1	199.15	-1.7648	0.0371413	0.192721	0.0128493	1.00366	5	0.0374333	0.193477	0.29938	1.29408	5	0.04747	0.217876	0.37049	1.49063	5	0.0451113	0.212394	1.17924	2.27119	5	2.04661	1.54434	-0.253519
-0.261729	0.90722	-0.317267	0.73845	NaN	NaN	0.585462	0.879275	-0.624862	-0.28364			+	+			-					2.5e-85	285.88	36681000000	1	285.88	0.62346	0.0371413	0.192721	0.0900579	1.08087	5	0.0374333	0.193477	0.381927	1.37662	5	0.04747	0.217876	-1.18493	-0.0647931	5	0.0451113	0.212394	-0.829616	0.262337	5	0.743658	0.428445	0.929109
-0.264357	0.80729	-0.517628	1.35588	NaN	NaN	0.503453	0.644569	0.38454	0.914721			+									4.08e-05	106.32	35221000	1	106.32	0.7796	0.0371413	0.192721	0.00804843	0.998857	5	0.150996	0.388582	-4.29283	5.58197	1	0.04747	0.217876	-0.175529	0.944608	5	0.19213	0.438326	-4.65474	6.48418	1	0.310568	0.342018	0.809659
-0.266795	0.146245	-0.265997	0.124504	NaN	NaN	0.656039	1.04954	0.999702	1.40625			+	+			+	+				2.14e-130	331.85	322840000	1	282.85	-0.25547	0.0371413	0.192721	0.160634	1.15144	5	0.0460981	0.214705	0.453426	1.64566	4	0.04747	0.217876	0.439634	1.55977	5	0.0557776	0.236173	0.750532	2.06197	4	0.0919189	2.56291	-0.597519
-0.274784	0.162962	-0.583996	0.847519	NaN	NaN	0.573898	0.880115	1.82846	2.40919			+	+			+	+				6.7e-29	205.88	3264200000	1	147.28	0.40568	0.0371413	0.192721	0.0784939	1.0693	5	0.0374333	0.193477	0.382767	1.37746	5	0.04747	0.217876	1.26839	2.38853	5	0.0451113	0.212394	1.86321	2.95516	5	0.81308	0.694649	0.714197
-0.279441	1.92529	-0.72874	3.57326	NaN	NaN	2.13595	2.42818	1.55835	2.25808			+	+		+	+	+				5.82e-07	153.24	529190000	1	153.24	-0.56627	0.0371413	0.192721	1.64055	2.63135	5	0.0460981	0.214705	1.83206	3.02429	4	0.04747	0.217876	0.99828	2.11842	5	0.0557776	0.236173	1.60236	2.9138	4	2.295	2.32468	2.15784
-0.289703	2.37616	-0.895352	6.0173	NaN	NaN	2.81272	3.108	2.03742	2.91467			+	+		+	+	+				2.86e-14	202.2	17476000000	1	202.2	0.3464	0.0371413	0.192721	2.31732	3.30813	5	0.0374333	0.193477	2.61065	3.60535	5	0.04747	0.217876	1.47735	2.59749	5	0.0451113	0.212394	2.36869	3.46065	5	3.11954	3.06867	2.97597
-0.298222	0.365569	-0.321314	1.94926	NaN	NaN	0.8669	1.21789	0.702443	1.04843			+	+				+				3.7e-24	208.33	385890000	1	172.51	0.23407	0.0599259	0.244798	0.0878446	1.64596	3	0.0374333	0.193477	0.72054	1.71524	5	0.0771789	0.277811	-0.181675	1.58656	3	0.0451113	0.212394	0.50245	1.5944	5	NaN	1.11104	0.493808
-0.31678	1.76574	-0.604873	4.29707	NaN	NaN	0.581213	0.926834	0.164328	0.77565			+	+		+		+				6.72e-14	182.92	1902200000	1	164.9	-0.16081	0.0371413	0.192721	0.0858085	1.07662	5	0.0374333	0.193477	0.429486	1.42418	5	0.04747	0.217876	-0.39574	0.724397	5	0.0451113	0.212394	0.229673	1.32163	5	0.651931	0.587564	0.929403
-0.322982	0.42529	-0.541255	0.812884	NaN	NaN	0.837676	1.18627	0.557638	1.10559			+	+				+				3.68e-10	152	609710000	1	144.42	0.05682	0.0371413	0.192721	0.342272	1.33308	5	0.0374333	0.193477	0.68892	1.68362	5	0.04747	0.217876	-0.00243029	1.11771	5	0.0451113	0.212394	0.559613	1.65157	5	0.868495	1.44117	1.53889
-0.360089	1.4153	-0.38091	0.649073	NaN	NaN	1.60994	1.91947	1.59748	1.87129			+	+			+	+				0.00809999	98.754	188910000	1	98.754	-0.12638	0.0599259	0.244798	0.830889	2.389	3	0.0858583	0.293016	0.658721	3.18021	2	0.0771789	0.277811	0.713367	2.4816	3	0.105854	0.325351	0.471416	3.27116	2	NaN	2.16657	1.6448
-0.367194	0.342363	-0.586416	0.654846	NaN	NaN	1.15461	1.62861	0.955402	1.55671			+	+			+	+				3.51e-23	159.59	1544600000	1	158.8	-0.407	0.0371413	0.192721	0.659209	1.65002	5	0.0460981	0.214705	1.03249	2.22472	4	0.04747	0.217876	0.395333	1.51547	5	0.0557777	0.236173	0.90099	2.21243	4	2.81279	1.20221	1.07461
-0.36927	0.411527	-0.505611	0.5442	NaN	NaN	1.42904	1.58404	1.84035	2.1832			+	+			+	+				1.34e-26	195.2	261280000	1	101.78	1.384	0.0371413	0.192721	0.933636	1.92444	5	0.0460981	0.214705	0.987927	2.18016	4	0.04747	0.217876	1.28028	2.40042	5	0.0557777	0.236173	1.52748	2.83892	4	0.885708	1.98117	1.83763
-0.376435	0.299211	-0.560039	0.860021	NaN	NaN	2.67755	3.05588	2.80502	3.3566			+	+			+	+				2.32e-91	294.97	34162000000	1	163.23	-1.1369	0.0371413	0.192721	2.18214	3.17295	5	0.0374333	0.193477	2.55853	3.55323	5	0.04747	0.217876	2.24495	3.36509	5	0.0451113	0.212394	2.81062	3.90257	5	2.60036	4.3845	2.65241
-0.379317	0.451827	-1.27641	1.40274	NaN	NaN	2.00403	2.39258	1.05796	2.306			+	+			+	+				2.34e-93	293.09	5123500000	1	214.66	-0.24271	0.0371413	0.192721	1.50862	2.49943	5	0.0374333	0.193477	1.89524	2.88993	5	0.04747	0.217876	0.497889	1.61803	5	0.0451113	0.212394	1.76002	2.85198	5	3.636	2.22032	1.68373
-0.398892	0.171091	-1.54176	0.558306	NaN	NaN	0.594784	1.01746	0.0144221	1.52297			+	+				+				1.76e-13	160.22	1013900000	1	160.22	-0.5187	0.0371413	0.192721	0.0993798	1.09019	5	0.0374333	0.193477	0.520111	1.51481	5	0.04747	0.217876	-0.545646	0.574491	5	0.0451113	0.212394	0.976995	2.06895	5	1.71595	-0.461139	1.17646
-0.40535	0.733294	-0.292094	0.615905	NaN	NaN	0.529128	0.958607	0.853088	1.16079			+	+			+	+				1.24e-06	133.48	168370000	1	108.97	1.3183	0.0371413	0.192721	0.0337241	1.02453	5	0.0374333	0.193477	0.461259	1.45596	5	0.04747	0.217876	0.293019	1.41316	5	0.0451113	0.212394	0.614817	1.70677	5	0.326011	0.998981	0.490703
-0.406185	0.28832	-1.10324	0.537472	NaN	NaN	2.02584	2.43941	1.7743	2.8521			+	+			+	+				5.27e-156	356.71	22650000000	1	264.64	0.078028	0.0371413	0.192721	1.53043	2.52124	5	0.0374333	0.193477	1.94206	2.93676	5	0.04747	0.217876	1.21423	2.33436	5	0.0451113	0.212394	2.30612	3.39808	5	2.94478	-0.147096	2.81569
-0.41515	0.268425	-0.587826	0.515958	NaN	NaN	2.62056	3.46156	-0.646529	-0.112574			+	+								0.00720176	81.263	27649000	1	67.981	-1.8487	0.0599259	0.244798	1.84151	3.39962	3	0.0858582	0.293016	2.20081	4.7223	2	0.077179	0.277811	-1.53065	0.23759	3	0.105853	0.325351	-1.51245	1.2873	2	1.6711	NaN	NaN
-0.416335	2.32559	-0.515584	2.16072	NaN	NaN	1.49509	1.92412	1.57841	2.09529			+	+		+	+	+				1.39e-257	420.05	5369000000	1	188.98	-0.6062	0.0371413	0.192721	0.999684	1.99049	5	0.0374333	0.193477	1.42678	2.42147	5	0.04747	0.217876	1.01834	2.13848	5	0.0451113	0.212394	1.54931	2.64126	5	1.58139	1.74286	1.53137
-0.439931	0.720699	-0.48414	0.593369	NaN	NaN	1.60161	2.05164	2.19343	2.6763			+	+			+	+				1.02e-13	178.54	7269700000	1	97.69	1.8465	0.0371413	0.192721	1.1062	2.09701	5	0.0374333	0.193477	1.5543	2.54899	5	0.04747	0.217876	1.63336	2.7535	5	0.0451113	0.212394	2.13032	3.22228	5	2.16698	0.666879	1.91697
-0.455595	0.459348	-0.476504	0.738948	NaN	NaN	0.880458	1.1308	1.97033	2.18766			+	+			+	+				4.68e-230	411.85	150740000	1	411.85	0.071902	0.0371413	0.192721	0.385054	1.37586	5	0.0599862	0.244921	0.351353	1.91025	3	0.04747	0.217876	1.41026	2.5304	5	0.0730557	0.270288	1.32749	3.04784	3	1.66615	1.32839	1.31463
-0.464667	1.68374	-0.568337	2.13822	NaN	NaN	1.58539	2.05886	2.58967	3.15056			+	+		+	+	+				4.96e-45	240.18	5815200000	1	156.6	-0.15385	0.0371413	0.192721	1.08998	2.08079	5	0.0374333	0.193477	1.56151	2.55621	5	0.04747	0.217876	2.02961	3.14974	5	0.0451113	0.212394	2.60459	3.69654	5	2.04008	1.81627	1.96986
-0.466817	1.34026	-0.529676	0.772819	NaN	NaN	0.511197	0.998669	0.815775	1.351			+	+			+	+				2.19e-26	159.17	8711600000	1	82.029	-0.98815	0.0371413	0.192721	0.0157928	1.0066	5	0.0374333	0.193477	0.501321	1.49602	5	0.04747	0.217876	0.255706	1.37584	5	0.0451113	0.212394	0.805025	1.89698	5	0.610831	0.315014	0.579048
-0.47014	0.242947	-0.643562	0.23141	NaN	NaN	1.95922	2.67022	0.39761	1.22956			+	+				+				1.68e-05	118.77	43579000	1	118.77	-0.61471	0.0458584	0.214146	1.36466	2.55379	4	0.0599862	0.244921	1.89077	3.44967	3	0.0587819	0.24245	-0.275539	1.07076	4	0.0730557	0.270288	0.369386	2.08974	3	3.05408	1.97634	1.58281
-0.474919	0.226943	-0.499065	0.222922	NaN	NaN	1.82636	2.30679	2.69066	3.18463			+	+			+	+				1.47e-40	200.62	1743400000	1	161.5	1.5299	0.0371413	0.192721	1.33096	2.32176	5	0.0374333	0.193477	1.80944	2.80413	5	0.04747	0.217876	2.13059	3.25073	5	0.0451113	0.212394	2.63866	3.73061	5	4.86968	0.697159	1.76172
-0.4926	0.794869	-0.701455	0.976811	NaN	NaN	1.12263	1.54479	1.77689	2.3734			+	+			+	+				4.23e-42	224.15	269160000	1	220.14	0.41581	0.0371413	0.192721	0.627223	1.61803	5	0.0460981	0.214705	0.948674	2.14091	4	0.04747	0.217876	1.21682	2.33695	5	0.0557777	0.236173	1.71768	3.02912	4	1.69777	1.61421	1.36903
-0.534217	0.216415	-0.354857	0.12051	NaN	NaN	2.33115	2.91931	4.32109	4.96716			+	+			+	+				8.35e-45	206.39	335560000	1	197.91	-0.52502	0.0599259	0.244798	1.5521	3.11021	3	0.0460981	0.214705	2.32319	3.51543	4	0.0771789	0.277811	3.43697	5.20521	3	0.0557777	0.236173	4.31144	5.62288	4	3.13719	4.071	NaN
-0.550557	0.363292	-0.77402	0.3077	NaN	NaN	1.95922	2.67022	0.39761	1.22956			+	+				+				1.68e-05	118.77	43579000	1	118.77	-0.61471	0.0458584	0.214146	1.36466	2.55379	4	0.0599862	0.244921	1.89077	3.44967	3	0.0587819	0.24245	-0.275539	1.07076	4	0.0730557	0.270288	0.369386	2.08974	3	3.05408	1.97634	1.58281
-0.575646	0.397892	-1.03511	0.577418	NaN	NaN	0.550444	1.1398	2.16982	3.17993			+	+			+	+				3.88e-16	180.15	5153100000	1	145.91	0.18756	0.0371413	0.192721	0.0550395	1.04585	5	0.0374333	0.193477	0.642456	1.63715	5	0.04747	0.217876	1.60975	2.72989	5	0.0451113	0.212394	2.63395	3.7259	5	0.804524	-0.584654	1.2917
-0.595777	0.353837	0.0418393	0.099069	NaN	NaN	0.718648	1.32506	2.43677	2.41491			+	+			+	+				0.00253818	81.95	1264100000	1	44.863	-1.4629	0.0371413	0.192721	0.223244	1.21405	5	0.0374333	0.193477	0.827713	1.82241	5	0.04747	0.217876	1.8767	2.99684	5	0.0451113	0.212394	1.86894	2.96089	5	1.68603	-2.1022	1.47253
-0.617444	0.966165	-0.988316	1.88815	NaN	NaN	1.39645	2.18138	2.67573	3.7953			+	+		+	+	+				1.76e-48	241.51	515970000	1	220.27	-0.42139	0.0458584	0.214146	0.801883	1.99101	4	0.0858582	0.293016	0.920633	3.44212	2	0.0587819	0.24245	2.00259	3.34888	4	0.105853	0.325351	2.39542	5.19517	2	1.72619	0.704375	1.83746
-0.686304	1.8748	-1.22618	2.5077	NaN	NaN	0.703956	0.99422	0.692039	1.56619			+			+	+					7.01e-14	165.18	688390000	1	81.788	-0.90261	0.0371413	0.192721	0.208552	1.19936	5	0.150995	0.388581	-3.94317	5.93161	1	0.04747	0.217876	0.131971	1.25211	5	0.192129	0.438325	-4.00326	7.13563	1	0.280185	0.450796	1.12424
-0.767832	1.16419	-0.497455	1.28594	NaN	NaN	0.768019	1.53756	2.08353	2.61288			+	+			+	+				6.36e-35	195.24	102920000	1	66.012	-0.64453	0.0371413	0.192721	0.272615	1.26342	5	0.0858582	0.293016	0.276816	2.79831	2	0.04747	0.217876	1.52346	2.6436	5	0.105853	0.325351	1.21301	4.01276	2	1.35792	0.652276	1.23076
-0.886255	0.728577	-1.74525	1.19258	NaN	NaN	0.922778	1.98793	-0.192106	1.68602			+	+				+				0.00417748	73.885	134150000	1	73.885	-0.50496	0.0458584	0.214146	0.328214	1.51734	4	0.0599863	0.244921	1.20849	2.76738	3	0.058782	0.24245	-0.865255	0.481043	4	0.0730558	0.270288	0.825839	2.5462	3	1.50379	NaN	-0.438652
-0.912298	1.60712	-0.862776	1.42981	NaN	NaN	0.738162	1.6521	0.844571	1.70023			+	+			+	+				3.59e-55	228.58	643890000	1	174.63	-0.71144	0.0458584	0.214146	0.143598	1.33273	4	0.0374333	0.193477	1.15475	2.14945	5	0.058782	0.24245	0.171422	1.51772	4	0.0451113	0.212394	1.15425	2.24621	5	0.990928	NaN	1.26725
-0.960626	1.33847	-1.01523	1.74021	NaN	NaN	0.938506	1.88551	1.61828	2.61289			+	+		+	+	+				5.35e-28	187.89	414240000	1	187.89	-0.7936	0.0371413	0.192721	0.443102	1.43391	5	0.0374333	0.193477	1.38816	2.38286	5	0.04747	0.217876	1.05821	2.17835	5	0.0451113	0.212394	2.06691	3.15887	5	2.31187	1.469	0.417247
-1.25404	0.627106	0.270803	1.34433	NaN	NaN	1.37312	2.59116	0.219529	-0.00721509			+	+								7.1e-05	115.29	640770000	1	69.342	0.68763	0.0371413	0.192721	0.877718	1.86853	5	0.0374333	0.193477	2.09381	3.08851	5	0.04747	0.217876	-0.34054	0.779597	5	0.0451113	0.212394	-0.553192	0.538761	5	0.504805	1.07661	1.39933
-1.42777	1.17681	0.439539	0.586611	NaN	NaN	1.10408	3.23913	-0.272533	0.15445			+									1.66e-08	136.3	79320000	1	94.551	-1.0382	0.0599259	0.244798	0.325021	1.88313	3	0.150995	0.388581	-1.69826	8.17652	1	0.077179	0.277811	-1.15665	0.611586	3	0.192129	0.438325	-5.415	5.7239	1	NaN	NaN	1.38663
1.22075	1.2503	0.0325823	0.0259596	NaN	NaN	-1.94834	-3.02016	-3.32965	-3.3328			-	-			-	-				1.78e-138	304.42	991990000	1	102.72	0.69571	0.0371413	0.192721	-2.44375	-1.45294	5	0.0374333	0.193477	-3.51751	-2.52281	5	0.058782	0.24245	-4.0028	-2.65651	4	0.0451113	0.212394	-3.87877	-2.78682	5	-2.34484	-2.52578	0.137484
1.219	0.967475	1.05551	1.31972	NaN	NaN	-0.589765	-1.67508	-0.389825	-1.36337			-	-				-				5.19e-52	219.85	512930000	1	154.35	0.1452	0.0371413	0.192721	-1.08517	-0.0943603	5	0.0374333	0.193477	-2.17243	-1.17774	5	0.04747	0.217876	-0.949893	0.170244	5	0.0451113	0.212394	-1.90934	-0.817391	5	-0.824602	1.5837	-1.92808
1.19398	0.480893	2.68734	1.56163	NaN	NaN	-0.994074	-2.23874	-0.955497	-3.35733			-	-		+	-	-				5.85e-96	287.13	394600000	1	148.78	-0.076893	0.0371413	0.192721	-1.48948	-0.498669	5	0.0858582	0.293016	-3.49949	-0.977999	2	0.04747	0.217876	-1.51557	-0.395429	5	0.105853	0.325351	-4.75721	-1.95746	2	-3.64955	0.993452	-3.50789
1.15431	1.36618	-0.0827108	0.0969516	NaN	NaN	-2.47357	-3.47706	-3.86498	-3.72747			-	-			-	-				8.94e-44	184.98	2551400000	1	184.98	3.0491	0.0371413	0.192721	-2.96898	-1.97817	5	0.0374333	0.193477	-3.97441	-2.97972	5	0.04747	0.217876	-4.42505	-3.30492	5	0.0451113	0.212394	-4.27345	-3.18149	5	-2.46361	-3.29091	-2.29787
0.913701	1.03037	0.132717	0.191138	NaN	NaN	-1.79867	-2.58346	-2.23378	-2.31276			-	-			-	-				7.09e-139	334.08	610470000	1	290.01	-1.6871	0.0371413	0.192721	-2.29407	-1.30327	5	0.0374333	0.193477	-3.08081	-2.08611	5	0.04747	0.217876	-2.79384	-1.67371	5	0.0451113	0.212394	-2.85874	-1.76678	5	-1.57742	-1.61275	-2.01176
0.910172	1.29867	0.718953	0.934081	NaN	NaN	-0.844455	-1.63656	-1.51112	-2.15554			-	-			-	-				3.2e-07	141.91	942590000	1	125.74	0.54657	0.0371413	0.192721	-1.33986	-0.349051	5	0.0374333	0.193477	-2.13391	-1.13922	5	0.04747	0.217876	-2.07119	-0.951055	5	0.0451113	0.212394	-2.70152	-1.60957	5	-0.71168	-1.15979	-1.81555
0.876603	1.15258	1.32509	1.76152	NaN	NaN	-0.638406	-1.35049	-0.500075	-1.50566			-		+	+						3.89e-05	122.7	77188000	1	120.96	0.20144	0.0458584	0.214146	-1.23297	-0.0438426	4	0.150995	0.388581	-6.28788	3.58691	1	0.058782	0.24245	-1.17322	0.173074	4	0.192129	0.438325	-7.07511	4.06379	1	-0.391803	0.239577	-1.74661
0.842497	1.56245	0.703269	1.9154	NaN	NaN	-0.639338	-1.3701	-0.576959	-1.21234			-	-		+	-	-				1.02e-205	393.61	466240000	1	393.61	1.0995	0.0371413	0.192721	-1.13474	-0.143934	5	0.0374333	0.193477	-1.86745	-0.872755	5	0.04747	0.217876	-1.13703	-0.0168901	5	0.0451113	0.212394	-1.75831	-0.66636	5	-0.747364	-1.23178	-0.182946
0.83299	0.79403	-0.0650322	0.0736408	NaN	NaN	-1.33223	-2.04634	-2.56645	-2.45413			-	-			-	-				4.36e-27	193.77	1673700000	1	193.77	-0.79669	0.0371413	0.192721	-1.82764	-0.83683	5	0.0374333	0.193477	-2.54368	-1.54899	5	0.04747	0.217876	-3.12652	-2.00638	5	0.0451113	0.212394	-3.00011	-1.90816	5	-2.06561	-1.76532	-2.07731
0.784079	0.557965	1.29627	0.778708	NaN	NaN	-2.34488	-3.14905	-1.91455	-3.14971			-	-			-	-				0.000105911	105.25	1097600000	1	105.25	1.682	0.0458584	0.214146	-2.93945	-1.75032	4	0.0599863	0.244921	-3.9285	-2.36961	3	0.058782	0.24245	-2.5877	-1.2414	4	0.0730558	0.270288	-4.00989	-2.28953	3	NaN	-0.335698	-3.59348
0.7673	0.618136	0.456505	0.278834	NaN	NaN	-0.850902	-1.50861	-0.564674	-0.964064			-	-			-	-				8.61e-92	285.94	225660000	1	249.54	-1.4212	0.0371413	0.192721	-1.34631	-0.355498	5	0.0374333	0.193477	-2.00595	-1.01126	5	0.04747	0.217876	-1.12474	-0.00460541	5	0.0451113	0.212394	-1.51004	-0.418088	5	-1.43029	0.995122	0.148201
0.741756	1.32657	0.722425	1.4677	NaN	NaN	-0.964612	-1.59703	-0.749814	-1.40241			-	-			-	-				4.53e-45	238.55	4558300000	1	210.07	0.14603	0.0371413	0.192721	-1.46002	-0.469208	5	0.0374333	0.193477	-2.09438	-1.09968	5	0.04747	0.217876	-1.30988	-0.189746	5	0.0451113	0.212394	-1.94839	-0.856438	5	-1.4025	-0.892628	-0.956284
0.741735	0.773422	0.539206	0.739122	NaN	NaN	-2.21408	-2.82999	-2.37546	-2.86339			-	-			-	-				1.67e-20	179.46	44197000	1	170.95	-0.53777	0.0458584	0.214146	-2.80864	-1.61951	4	0.0599863	0.244921	-3.60944	-2.05054	3	0.058782	0.24245	-3.04861	-1.70231	4	0.0730557	0.270288	-3.72356	-2.00321	3	-1.71168	-2.70987	-2.16166
0.736225	0.76545	0.309999	0.171956	NaN	NaN	-0.631574	-1.13481	-1.34873	-1.76774			-	-			-	-				0.00460825	78.342	571790000	1	62.166	0.19153	0.0458584	0.214146	-1.22614	-0.03701	4	0.0460981	0.214705	-1.73092	-0.53869	4	0.04747	0.217876	-1.9088	-0.788659	5	0.0557776	0.236173	-2.42346	-1.11202	4	-1.0597	0.794303	-1.66792
0.724291	0.921351	0.44166	2.40365	NaN	NaN	-0.506599	-0.51749	-0.980421	-1.05267			-			+	-					5.26e-50	209.75	273860000	1	201.08	0.11202	0.0371413	0.192721	-1.002	-0.011195	5	0.150995	0.388581	-5.45488	4.4199	1	0.04747	0.217876	-1.54049	-0.420352	5	0.192129	0.438325	-6.62212	4.51678	1	-1.52173	0.0548823	0.738204
0.711761	1.63174	-0.394276	0.426505	NaN	NaN	-2.5926	-3.17866	-2.90319	-2.47376			-	-			-	-				8.09e-111	265.81	1421300000	1	242.5	0.33673	0.0371413	0.192721	-3.088	-2.0972	5	0.0374333	0.193477	-3.67601	-2.68131	5	0.04747	0.217876	-3.46326	-2.34312	5	0.0451113	0.212394	-3.01973	-1.92778	5	-2.81689	-3.16701	-2.89163
0.711461	0.633738	-0.382744	0.492766	NaN	NaN	-2.27423	-2.86356	-3.05898	-2.52244			-	-			-	-				8.17e-88	242.5	435720000	1	83.948	-1.0193	0.0371413	0.192721	-2.76964	-1.77883	5	0.0374333	0.193477	-3.36091	-2.36621	5	0.04747	0.217876	-3.61905	-2.49891	5	0.0557778	0.236173	-3.17816	-1.86672	4	-2.54451	-2.83427	-2.51131
0.694558	1.8247	-0.019593	0.0548943	NaN	NaN	-2.62582	-3.0987	-3.24534	-3.18561			-	-			-	-				0.000205807	117.25	83306000	1	84.507	-0.46188	0.0371413	0.192721	-3.12123	-2.13042	5	0.0460982	0.214705	-3.69482	-2.50258	4	0.04747	0.217876	-3.80541	-2.68527	5	0.0557778	0.236173	-3.84133	-2.52989	4	-2.48576	-2.70735	-2.46182
0.677489	0.437638	0.224847	0.0878189	NaN	NaN	-2.2206	-2.77859	-2.68767	-2.54375			-	-			-	-				4.53e-167	335.18	759830000	1	335.18	1.0797	0.0371413	0.192721	-2.71601	-1.7252	5	0.0374333	0.193477	-3.27594	-2.28124	5	0.04747	0.217876	-3.24774	-2.1276	5	0.0557778	0.236173	-3.19947	-1.88803	4	-2.37538	-4.02475	-1.59851
0.665066	1.58899	0.29622	2.92354	NaN	NaN	-0.676882	-1.2404	0.352204	0.100297			-	-								1.84e-135	326.47	20936000000	1	289.32	-0.65585	0.0371413	0.192721	-1.17229	-0.181478	5	0.0374333	0.193477	-1.73775	-0.743054	5	0.04747	0.217876	-0.207865	0.912272	5	0.0451113	0.212394	-0.445679	0.646274	5	-0.49972	-0.633102	-0.540419
0.64285	0.633078	-2.4938	0.582035	NaN	NaN	-1.3784	-1.88126	-2.05607	0.660313			-	-			-					2.02e-27	199.96	411440000	1	152.25	-3.3632	0.0371413	0.192721	-1.87381	-0.883001	5	0.0460981	0.214705	-2.47737	-1.28514	4	0.04747	0.217876	-2.61614	-1.49601	5	0.0730556	0.270288	-0.199863	1.52049	3	-1.93247	-0.521655	-0.871432
0.621402	1.8757	0.499123	0.89653	NaN	NaN	-0.731296	-1.24294	-0.501806	-0.689658			-	-				-				2.61e-09	142.89	233740000	1	137.01	-0.34162	0.0371413	0.192721	-1.2267	-0.235892	5	0.0460982	0.214705	-1.83906	-0.646822	4	0.04747	0.217876	-1.06187	0.0582626	5	0.0557778	0.236173	-1.34538	-0.0339362	4	-0.256538	-0.589147	-0.560389
0.61738	0.766827	0.0755495	0.0850977	NaN	NaN	-0.828776	-1.22714	-1.11255	-1.07492			-	-			-	-				6.68e-163	338.93	337530000	1	338.93	-0.60444	0.0458584	0.214146	-1.42334	-0.234212	4	0.0460981	0.214705	-1.82326	-0.631028	4	0.058782	0.24245	-1.7857	-0.439399	4	0.0557777	0.236173	-1.73064	-0.419195	4	-1.03439	NaN	-0.575684
0.610968	1.53385	-0.0666496	0.130949	NaN	NaN	-1.39157	-1.89625	-3.29435	-3.17584			-	-			-	-				8.44e-11	176.65	12172000000	1	136.84	0.41254	0.0371413	0.192721	-1.88697	-0.896162	5	0.0374333	0.193477	-2.3936	-1.3989	5	0.04747	0.217876	-3.85441	-2.73428	5	0.0451113	0.212394	-3.72181	-2.62986	5	-1.19029	-1.38105	-1.53632
0.599421	1.54878	-0.0676611	0.390518	NaN	NaN	-3.25276	-3.72584	-4.02521	-3.90107			-	-			-	-				4.61e-36	216.34	2882200000	1	136.35	3.0108	0.0371413	0.192721	-3.74817	-2.75736	5	0.0374333	0.193477	-4.22318	-3.22849	5	0.04747	0.217876	-4.58528	-3.46514	5	0.0451113	0.212394	-4.44704	-3.35509	5	-3.1982	-3.58009	-3.04906
0.594532	1.27832	0.430447	0.532722	NaN	NaN	-1.49776	-1.98581	-2.1379	-2.50232			-	-			-	-				6.19e-61	247.79	2867900000	1	217.19	-0.39542	0.0371413	0.192721	-1.99316	-1.00235	5	0.0374333	0.193477	-2.48315	-1.48846	5	0.04747	0.217876	-2.69797	-1.57783	5	0.0451113	0.212394	-3.0483	-1.95635	5	-1.48699	-2.12794	-1.01927
0.589629	0.495056	0.0573252	0.201981	NaN	NaN	-0.93671	-1.4264	-1.99177	-2.0106			-	-			-	-				2.83e-12	159.81	4993600000	1	119.53	0.232	0.0371413	0.192721	-1.43211	-0.441306	5	0.0374333	0.193477	-1.92375	-0.929055	5	0.0587819	0.24245	-2.66492	-1.31862	4	0.0451113	0.212394	-2.55658	-1.46462	5	-1.53131	-1.59065	-1.32025
0.589612	0.489296	0.485145	0.503503	NaN	NaN	-0.937361	-1.42703	-1.42456	-1.84586			-	-			-	-				0.000317988	116.75	350430000	1	52.193	0.051831	0.0371413	0.192721	-1.43276	-0.441956	5	0.0374333	0.193477	-1.92438	-0.929683	5	0.04747	0.217876	-1.98462	-0.864488	5	0.0451113	0.212394	-2.39183	-1.29988	5	-2.11287	-1.15908	-0.154287
0.581036	2.06851	0.625763	2.89418	NaN	NaN	-0.810854	-1.29387	-0.544515	-1.10596			-	-	+	+		-				3.5e-197	393.81	2099700000	1	375.08	-0.92252	0.0371413	0.192721	-1.30626	-0.31545	5	0.0374333	0.193477	-1.79122	-0.796523	5	0.04747	0.217876	-1.10458	0.015553	5	0.0451113	0.212394	-1.65193	-0.559978	5	-0.520886	-0.625113	-0.830198
0.571659	0.748101	0.388916	0.322663	NaN	NaN	-1.32297	-1.79146	-1.47218	-1.80112			-	-			-	-				6.81e-80	277.8	2324300000	1	277.8	-2.5563	0.0371413	0.192721	-1.81838	-0.827567	5	0.0374333	0.193477	-2.28881	-1.29411	5	0.04747	0.217876	-2.03225	-0.912113	5	0.0451113	0.212394	-2.3471	-1.25514	5	-0.861157	-1.78071	-1.17585
0.566108	0.466526	0.195514	1.15839	NaN	NaN	-0.63188	-1.10286	-1.53683	-1.68656			-	-			-	-				2.12e-22	161.37	3043300000	1	120.87	-0.02619	0.0371413	0.192721	-1.12728	-0.136476	5	0.0374333	0.193477	-1.60021	-0.605509	5	0.0587819	0.24245	-2.20998	-0.863682	4	0.0451113	0.212394	-2.23254	-1.14058	5	-1.20316	-1.2305	-1.05064
0.566097	1.5018	-0.0226935	0.0428855	NaN	NaN	-1.67278	-2.04782	-1.67172	-1.63727			-	-			-	-				6.89e-139	344.61	1206000000	1	344.61	-0.49185	0.0371413	0.192721	-2.16819	-1.17738	5	0.0460981	0.214705	-2.64393	-1.4517	4	0.04747	0.217876	-2.23179	-1.11166	5	0.0557777	0.236173	-2.29299	-0.981547	4	-1.40482	-1.58381	-1.51362
0.563543	1.26476	0.181429	0.256821	NaN	NaN	-1.37423	-1.83452	-2.57685	-2.70025			-	-			-	-				1.72e-62	243.92	517590000	1	231.49	1.4972	0.0371413	0.192721	-1.86964	-0.878829	5	0.0374333	0.193477	-2.33187	-1.33717	5	0.04747	0.217876	-3.13692	-2.01678	5	0.0451113	0.212394	-3.24622	-2.15427	5	-1.32093	-1.91117	-1.39076
0.562084	0.515679	0.575223	0.373226	NaN	NaN	-1.14328	-1.61442	-2.48515	-2.98585			-	-			-	-				1.7e-112	321.81	514130000	1	296.22	-0.38463	0.0458584	0.214146	-1.73785	-0.54872	4	0.0374333	0.193477	-2.11177	-1.11708	5	0.04747	0.217876	-3.04522	-1.92508	5	0.0451113	0.212394	-3.53183	-2.43987	5	-1.5801	0.376178	-2.34611
0.561701	1.72688	0.463821	3.51792	NaN	NaN	-1.75093	-2.20528	-1.13622	-1.53896			-	-		+	-	-				1.49e-29	210.4	1879100000	1	210.4	0.31881	0.0371413	0.192721	-2.24633	-1.25552	5	0.0374333	0.193477	-2.70263	-1.70793	5	0.04747	0.217876	-1.69629	-0.576155	5	0.0451113	0.212394	-2.08494	-0.992988	5	-1.52875	-2.02206	-1.52758
0.561506	0.878851	0.264952	0.237353	NaN	NaN	-2.71253	-3.15598	-3.08006	-3.28015			-	-			-	-				2.03e-23	202.15	2478900000	1	150.26	-0.20095	0.0371413	0.192721	-3.20793	-2.21712	5	0.0374333	0.193477	-3.65332	-2.65863	5	0.04747	0.217876	-3.64013	-2.51999	5	0.0451113	0.212394	-3.82612	-2.73417	5	-3.11533	-2.99503	-3.08352
0.554018	0.592356	1.35997	1.48193	NaN	NaN	-1.33299	-1.78478	-1.10891	-2.36913			-	-		+	-	-				6.23e-231	415.76	1711700000	1	343.34	0.030485	0.0371413	0.192721	-1.82839	-0.837585	5	0.0374333	0.193477	-2.28213	-1.28743	5	0.04747	0.217876	-1.66898	-0.54884	5	0.0451113	0.212394	-2.9151	-1.82315	5	-1.41765	-2.162	-1.84875
0.553461	1.58888	-0.406273	0.736827	NaN	NaN	-0.64854	-1.10744	-1.95272	-1.51787			-	-			-	-				4.14e-14	180.62	6890700000	1	43.184	-0.08911	0.0371413	0.192721	-1.14394	-0.153135	5	0.0374333	0.193477	-1.60479	-0.610092	5	0.04747	0.217876	-2.51278	-1.39265	5	0.0451113	0.212394	-2.06385	-0.971894	5	-0.462957	-0.653837	-0.938397
0.544566	0.486267	-0.397645	0.771258	NaN	NaN	-2.81382	-3.24595	-3.01394	-2.56806			-	-			-	-				3.36e-111	319.29	654660000	1	269.95	0.23888	0.0371413	0.192721	-3.30922	-2.31841	5	0.0460981	0.214705	-3.84206	-2.64983	4	0.04747	0.217876	-3.57401	-2.45388	5	0.0557776	0.236173	-3.22379	-1.91234	4	-2.4742	-3.18744	-1.39888
0.544439	1.96566	0.350133	0.868655	NaN	NaN	-1.92188	-2.3581	-3.01842	-3.30039			-	-			-	-				1.64e-10	168.22	728410000	1	152.64	0.32191	0.0371413	0.192721	-2.41729	-1.42648	5	0.0374333	0.193477	-2.85545	-1.86075	5	0.04747	0.217876	-3.57849	-2.45835	5	0.0451113	0.212394	-3.84636	-2.75441	5	-1.72756	-2.31164	-1.93887
0.532825	1.46903	0.153318	0.47751	NaN	NaN	-0.87525	-1.31222	-0.0494216	-0.162058			-	-								1.95e-55	257.58	2103700000	1	257.58	-0.6186	0.0371413	0.192721	-1.37065	-0.379846	5	0.0374333	0.193477	-1.80957	-0.814871	5	0.04747	0.217876	-0.60949	0.510647	5	0.0451113	0.212394	-0.708034	0.383919	5	-0.677944	-1.19136	-0.475072
0.523979	2.18422	0.186078	0.376923	NaN	NaN	-1.01833	-1.44539	-1.6026	-1.73666			-	-			-	-				4.45e-23	177.69	870480000	1	177.69	0.5581	0.0371413	0.192721	-1.51373	-0.522924	5	0.0374333	0.193477	-1.94273	-0.948037	5	0.04747	0.217876	-2.16267	-1.04253	5	0.0451113	0.212394	-2.28264	-1.19068	5	-1.2792	-0.857511	-0.588333
0.521426	0.433394	0.24493	1.15378	NaN	NaN	-0.565796	-0.995498	-1.53778	-1.73479			-	-			-	-				6.07e-207	389.92	2549200000	1	386.86	0.34894	0.0371413	0.192721	-1.0612	-0.0703914	5	0.0374333	0.193477	-1.49285	-0.49815	5	0.0587819	0.24245	-2.21093	-0.864634	4	0.0451113	0.212394	-2.28076	-1.18881	5	-1.05342	-1.25445	-1.10846
0.513956	1.83651	0.130509	0.429743	NaN	NaN	-1.45738	-1.87012	-2.02392	-2.10214			-	-			-	-				4.16e-11	171.5	353790000	1	168.9	0.50842	0.0371413	0.192721	-1.95279	-0.96198	5	0.0374333	0.193477	-2.36747	-1.37277	5	0.04747	0.217876	-2.58399	-1.46385	5	0.0451113	0.212394	-2.64811	-1.55616	5	-1.25288	-1.57104	-1.11904
0.509839	1.70798	0.102676	0.311093	NaN	NaN	-0.593467	-1.01197	0.0352067	-0.0295229			-	-								8.13e-64	263.84	2739800000	1	109.82	-0.43978	0.0371413	0.192721	-1.08887	-0.0980623	5	0.0374333	0.193477	-1.50931	-0.514618	5	0.04747	0.217876	-0.524862	0.595275	5	0.0451113	0.212394	-0.575499	0.516454	5	-0.473491	-0.825786	-0.506323
0.504238	0.718022	0.206646	0.340439	NaN	NaN	-2.11523	-2.5115	-1.67576	-1.82903			-	-			-	-				1.54e-07	149.82	823980000	1	140.16	0.40139	0.0371413	0.192721	-2.61064	-1.61983	5	0.0374333	0.193477	-3.00885	-2.01415	5	0.04747	0.217876	-2.23583	-1.11569	5	0.0451113	0.212394	-2.37501	-1.28306	5	-1.29789	-1.97268	-2.89333
0.498268	1.06877	-0.102053	0.169339	NaN	NaN	-0.780301	-1.27274	-0.0550509	-0.0462864			-	-								3.8e-06	107.79	89354000	1	100.25	-0.15368	0.0371413	0.192721	-1.27571	-0.284897	5	0.0460982	0.214705	-1.86886	-0.676627	4	0.04747	0.217876	-0.615119	0.505018	5	0.0557778	0.236173	-0.702009	0.609436	4	-0.71339	-0.776328	-0.591502
0.49752	0.618232	-0.339706	0.268862	NaN	NaN	-0.765454	-1.17045	-0.379051	-0.0179324			-	-								4.52e-39	224.36	456330000	1	224.36	0.72061	0.0371413	0.192721	-1.26086	-0.27005	5	0.0374333	0.193477	-1.6678	-0.673105	5	0.04747	0.217876	-0.93912	0.181017	5	0.0451113	0.212394	-0.563909	0.528044	5	-0.65091	-1.51064	0.362936
0.49622	2.22915	0.27153	1.18852	NaN	NaN	-1.65046	-2.04437	-2.21658	-2.42847			-	-			-	-				1.28e-45	232.19	7699300000	1	232.19	-0.19549	0.0371413	0.192721	-2.14586	-1.15506	5	0.0374333	0.193477	-2.54172	-1.54702	5	0.04747	0.217876	-2.77665	-1.65651	5	0.0451113	0.212394	-2.97445	-1.8825	5	-2.03581	-1.75891	-1.53558
0.491507	0.310921	1.06845	0.970637	NaN	NaN	-1.40903	-1.56262	-1.56519	-2.37154			-	-			-	-				2.89e-23	171.72	127740000	1	57.14	-0.5135	0.0371413	0.192721	-1.90443	-0.913623	5	0.085858	0.293015	-2.82336	-0.301872	2	0.04747	0.217876	-2.12526	-1.00512	5	0.105853	0.325351	-3.77142	-0.971671	2	0.228256	0.0828148	-2.00277
0.481906	0.351876	0.166939	0.112983	NaN	NaN	-1.35941	-1.74311	-1.62471	-1.74032			-	-			-	-				2.1e-10	154.41	3648300000	1	148.89	-0.33827	0.0371413	0.192721	-1.85482	-0.864007	5	0.0374333	0.193477	-2.24045	-1.24576	5	0.04747	0.217876	-2.18478	-1.06464	5	0.0451113	0.212394	-2.2863	-1.19435	5	-0.525473	-2.05694	-2.38664
0.473489	2.16898	-0.198553	0.860199	NaN	NaN	-0.673321	-1.05675	-0.815208	-0.586339			-	-			-	-				2.56e-161	346.57	5676100000	1	237.22	0.46556	0.0371413	0.192721	-1.16873	-0.177917	5	0.0374333	0.193477	-1.5541	-0.559405	5	0.04747	0.217876	-1.37528	-0.255139	5	0.0451113	0.212394	-1.13232	-0.0403624	5	-0.462423	-0.90016	-0.583034
0.473046	1.08598	0.247276	0.162524	NaN	NaN	-0.692535	-1.07533	-0.626091	-0.824931			-	-			-	-				4.72e-27	194.3	1347900000	1	184.34	-0.41944	0.0371413	0.192721	-1.18794	-0.19713	5	0.0374333	0.193477	-1.57268	-0.577987	5	0.04747	0.217876	-1.18616	-0.0660224	5	0.0451113	0.212394	-1.37091	-0.278954	5	-0.954822	-1.01052	-1.00477
0.456147	2.01312	-0.233202	0.575349	NaN	NaN	-2.06232	-2.44478	-3.09529	-2.85728			-	-			-	-				1.59e-05	114.97	385100000	1	114.97	0.13636	0.0458584	0.214146	-2.65689	-1.46776	4	0.0374333	0.193477	-2.94213	-1.94743	5	0.058782	0.24245	-3.76844	-2.42214	4	0.0451113	0.212394	-3.40325	-2.3113	5	NaN	-2.42925	-1.933
0.455267	0.725926	0.488287	0.839375	NaN	NaN	-0.579042	-0.946391	-0.607258	-1.03678			-	-			-	-				3.59e-50	244.05	235140000	1	240.5	1.0535	0.0371413	0.192721	-1.07445	-0.083638	5	0.0374333	0.193477	-1.44374	-0.449043	5	0.04747	0.217876	-1.16733	-0.0471891	5	0.0451113	0.212394	-1.58276	-0.490803	5	-0.316464	-0.370746	-0.844874
0.454202	0.529023	-0.31646	0.302024	NaN	NaN	-1.10133	-1.46186	-1.63947	-1.29255			-	-			-	-				7.98e-111	313.45	360670000	1	62.107	2.2655	0.0371413	0.192721	-1.59674	-0.605927	5	0.0374333	0.193477	-1.9592	-0.964508	5	0.04747	0.217876	-2.19954	-1.0794	5	0.0451113	0.212394	-1.83852	-0.74657	5	-0.852762	-2.11071	-1.35061
0.452132	0.186792	0.6136	0.316071	NaN	NaN	-2.58509	-2.92713	-2.36635	-2.90452			-	-			-	-				2.42e-11	172.1	3009600000	1	69.613	0.061874	0.0371413	0.192721	-3.0805	-2.08969	5	0.0374333	0.193477	-3.42448	-2.42978	5	0.04747	0.217876	-2.92642	-1.80628	5	0.0451113	0.212394	-3.4505	-2.35855	5	-3.65664	-1.97173	0.745879
0.445632	0.561744	0.230991	0.201819	NaN	NaN	-0.617022	-0.974889	-0.341421	-0.526498			-	-								5.41e-35	209.8	1312900000	1	103.43	-0.96805	0.0371413	0.192721	-1.11243	-0.121618	5	0.0374333	0.193477	-1.47224	-0.477541	5	0.04747	0.217876	-0.90149	0.218647	5	0.0451113	0.212394	-1.07248	0.019478	5	-1.21103	-0.626842	0.200237
0.427249	0.609521	0.296565	0.460379	NaN	NaN	-0.673127	-1.01308	-0.93875	-1.18275			-	-			-	-				1.49e-10	149	795000000	1	99.481	0.34431	0.0371413	0.192721	-1.16853	-0.177723	5	0.0374333	0.193477	-1.51043	-0.515736	5	0.04747	0.217876	-1.49882	-0.378682	5	0.0451113	0.212394	-1.72872	-0.63677	5	0.5886	-1.04669	-0.773598
0.423882	1.41453	0.332675	1.7464	NaN	NaN	-0.750384	-1.13157	-0.50159	-0.815735			-	-				-				9.84e-109	287.91	1424900000	1	241.38	-0.75585	0.0371413	0.192721	-1.24579	-0.25498	5	0.0460982	0.214705	-1.72769	-0.535452	4	0.04747	0.217876	-1.06166	0.0584781	5	0.0557778	0.236173	-1.47146	-0.160013	4	-0.507882	-1.0421	-0.60918
0.421114	0.968819	0.398592	0.889926	NaN	NaN	-1.66659	-1.91487	-2.56639	-2.69456			-	-			-	-				1.05e-57	242.26	915310000	1	242.26	-0.43988	0.0371413	0.192721	-2.162	-1.17119	5	0.0460981	0.214705	-2.51098	-1.31875	4	0.04747	0.217876	-3.12646	-2.00632	5	0.0557776	0.236173	-3.35029	-2.03884	4	-2.03435	-1.48692	-1.62377
0.41929	1.08955	0.35571	1.63036	NaN	NaN	-0.872577	-1.20283	-1.34449	-1.64248			-	-			-	-				1.9e-15	154.67	946000000	1	135.5	0.24882	0.0371413	0.192721	-1.36798	-0.377173	5	0.0374333	0.193477	-1.70017	-0.705479	5	0.04747	0.217876	-1.90456	-0.784423	5	0.0451113	0.212394	-2.18846	-1.0965	5	-0.578634	-1.52227	-0.678613
0.416675	0.832743	1.21865	2.0634	NaN	NaN	-0.523725	-0.675255	-0.490217	-0.675823			-		+	+						4.59e-13	164.68	266800000	1	164.68	0.62296	0.0371413	0.192721	-1.01913	-0.0283209	5	0.150995	0.388581	-5.61265	4.26214	1	0.04747	0.217876	-1.05029	0.0698517	5	0.192129	0.438326	-6.24528	4.89363	1	-0.148968	-0.589081	-0.494399
0.412365	1.15452	0.02805	0.0494814	NaN	NaN	-1.04642	-1.36822	-1.72252	-1.70464			-	-			-	-				2.23e-45	231.51	4367600000	1	71.497	-2.7521	0.0371413	0.192721	-1.54183	-0.551019	5	0.0374333	0.193477	-1.86557	-0.870875	5	0.04747	0.217876	-2.28259	-1.16245	5	0.0451113	0.212394	-2.25061	-1.15866	5	-0.439026	-0.905389	-0.969584
0.406186	1.75126	0.25669	1.84895	NaN	NaN	-0.648239	-0.968669	-0.557117	-0.765403			-	-				-				1.27e-15	167.3	9440500000	1	158.59	-0.5907	0.0371413	0.192721	-1.14364	-0.152835	5	0.0374333	0.193477	-1.46602	-0.471321	5	0.04747	0.217876	-1.11719	0.00295127	5	0.0451113	0.212394	-1.31138	-0.219426	5	-0.409299	-0.726442	-0.566442
0.405885	1.17147	-0.380314	0.196978	NaN	NaN	-0.937308	-1.26946	-0.909263	-0.510489			-	-			-					1.54e-13	184.36	93439000	1	75.819	-0.34897	0.0458584	0.214146	-1.53187	-0.342744	4	0.0374333	0.193477	-1.76681	-0.772115	5	0.058782	0.24245	-1.58241	-0.236114	4	0.0451113	0.212394	-1.05647	0.0354877	5	-0.990681	-0.952552	NaN
0.404039	0.375843	0.116168	0.0823253	NaN	NaN	-0.511516	-0.831451	-0.112222	-0.188917			-	-								9.96e-07	125.67	672650000	1	125.67	-0.88363	0.0371413	0.192721	-1.00692	-0.0161114	5	0.0374333	0.193477	-1.3288	-0.334103	5	0.04747	0.217876	-0.67229	0.447847	5	0.0451113	0.212394	-0.734894	0.35706	5	-0.703321	0.644851	0.0234985
0.396818	1.69371	0.256999	0.418883	NaN	NaN	-0.735575	-1.04622	-0.46791	-0.677061			-	-				-				1.4e-92	288.16	509460000	1	265.77	-0.3812	0.0371413	0.192721	-1.23098	-0.240171	5	0.0374333	0.193477	-1.54357	-0.548875	5	0.04747	0.217876	-1.02798	0.0921581	5	0.0451113	0.212394	-1.22304	-0.131085	5	-0.586147	-0.949565	-0.461761
0.394403	2.45572	-0.157357	0.102308	NaN	NaN	-1.6406	-1.93888	-1.47129	-1.27765			-	-			-	-				1.63e-36	210.96	3415000000	1	120.53	1.7912	0.0371413	0.192721	-2.136	-1.14519	5	0.0374333	0.193477	-2.43623	-1.44154	5	0.04747	0.217876	-2.03136	-0.911226	5	0.0451113	0.212394	-1.82362	-0.731671	5	-1.54141	-1.78171	-1.74608
0.390929	1.68496	0.0367685	0.228784	NaN	NaN	-1.08335	-1.38458	-1.22796	-1.22158			-	-			-	-				4.6e-39	240.92	45876000000	1	240.44	1.8195	0.0371413	0.192721	-1.57875	-0.587945	5	0.0374333	0.193477	-1.88193	-0.887234	5	0.04747	0.217876	-1.78803	-0.667895	5	0.0451113	0.212394	-1.76756	-0.675603	5	-0.850892	-1.42165	-0.882186
0.389782	2.77905	1.00472	3.94793	NaN	NaN	-1.80327	-2.0954	-1.64566	-2.56259			-	-		+	-	-				4.47e-19	202.2	16890000000	1	145.9	-0.022973	0.0371413	0.192721	-2.29868	-1.30787	5	0.0374333	0.193477	-2.59275	-1.59805	5	0.04747	0.217876	-2.20573	-1.08559	5	0.0451113	0.212394	-3.10857	-2.01662	5	-1.65957	-1.89359	-1.74165
0.385385	0.760537	-0.372319	0.485329	NaN	NaN	-2.4712	-2.75175	-2.24925	-1.845			-	-			-	-				9.18e-56	262.11	14919000000	1	262.11	-0.30466	0.0371413	0.192721	-2.96661	-1.9758	5	0.0374333	0.193477	-3.24909	-2.2544	5	0.04747	0.217876	-2.80932	-1.68918	5	0.0451113	0.212394	-2.39097	-1.29902	5	-2.39918	-3.0637	-2.59875
0.382524	0.518699	0.522006	0.554578	NaN	NaN	-1.27803	-1.56919	-0.665345	-1.12675			-	-			-	-				3.42e-28	195.6	334750000	1	195.23	-0.72353	0.0371413	0.192721	-1.77343	-0.782621	5	0.0374333	0.193477	-2.06653	-1.07184	5	0.04747	0.217876	-1.22541	-0.105276	5	0.0451113	0.212394	-1.67273	-0.580777	5	-1.23573	-1.51854	-1.09903
0.381368	2.58771	1.36404	1.26066	NaN	NaN	-1.05295	-1.34553	0.646371	-0.628941			-	-			+	-				1.97e-15	187.42	5521700000	1	181.4	-0.75678	0.0371413	0.192721	-1.54836	-0.557547	5	0.0374333	0.193477	-1.84288	-0.848186	5	0.04747	0.217876	0.0863023	1.20644	5	0.0451113	0.212394	-1.17492	-0.0829645	5	-0.981001	-1.00857	-0.912821
0.381301	1.39253	0.121683	0.579381	NaN	NaN	-1.79812	-2.08233	-1.84554	-1.91645			-	-			-	-				9.81e-207	387.32	10687000000	1	387.32	0.33355	0.0371413	0.192721	-2.29353	-1.30272	5	0.0374333	0.193477	-2.57968	-1.58498	5	0.04747	0.217876	-2.40561	-1.28547	5	0.0451113	0.212394	-2.46242	-1.37047	5	-1.78544	-1.9754	-1.67706
0.379491	0.375111	0.207315	0.300266	NaN	NaN	-2.99451	-3.26367	-2.37773	-2.52716			-	-			-	-				7.45e-16	165.63	585050000	1	165.63	-0.38997	0.0371413	0.192721	-3.48991	-2.4991	5	0.0374333	0.193477	-3.76102	-2.76632	5	0.04747	0.217876	-2.9378	-1.81766	5	0.0451113	0.212394	-3.07314	-1.98119	5	-2.40798	-3.27781	-3.19301
0.37874	1.12744	0.257286	0.362368	NaN	NaN	-1.15681	-1.44576	-0.99435	-1.20041			-	-			-	-				5.68e-17	175.34	1081500000	1	175.34	-0.10749	0.0371413	0.192721	-1.65221	-0.661403	5	0.0374333	0.193477	-1.94311	-0.948412	5	0.04747	0.217876	-1.55442	-0.434281	5	0.0451113	0.212394	-1.74639	-0.654438	5	-1.10795	-1.53458	-0.751752
0.374205	1.39773	0.0850186	0.879333	NaN	NaN	-0.889886	-1.17755	-0.26802	-0.313922			-	-								3.17e-72	266.01	5418100000	1	237.65	0.044256	0.0371413	0.192721	-1.38529	-0.394482	5	0.0374333	0.193477	-1.6749	-0.680204	5	0.04747	0.217876	-0.828088	0.292048	5	0.0451113	0.212394	-0.859899	0.232054	5	-0.795039	-0.362769	-0.987955
0.371814	0.353884	0.89029	0.693296	NaN	NaN	-1.02852	-1.31239	-1.71323	-2.52027			-	-			-	-				2.87e-132	334.3	919430000	1	170	0.38725	0.0371413	0.192721	-1.52392	-0.533113	5	0.0374333	0.193477	-1.80974	-0.81504	5	0.04747	0.217876	-2.2733	-1.15317	5	0.0451113	0.212394	-3.06625	-1.9743	5	-1.87048	-1.18563	-1.04289
0.369683	1.09911	0.112119	0.222173	NaN	NaN	-0.743357	-0.959441	-0.884452	-0.897776			-	-			-	-				9.79e-05	116.77	618480000	1	116.77	-0.42955	0.0371413	0.192721	-1.23876	-0.247953	5	0.0460981	0.214705	-1.55556	-0.363325	4	0.04747	0.217876	-1.44452	-0.324384	5	0.0557777	0.236173	-1.5535	-0.242055	4	-0.408336	-1.08503	-0.840009
0.367832	1.25491	0.0824411	0.471359	NaN	NaN	-0.620984	-0.905656	-0.278242	-0.321613			-	-								4.39e-11	179.31	23728000000	1	179.31	0.092565	0.0371413	0.192721	-1.11639	-0.12558	5	0.0374333	0.193477	-1.403	-0.408308	5	0.04747	0.217876	-0.83831	0.281827	5	0.0451113	0.212394	-0.867589	0.224364	5	-0.367978	-0.428023	-0.743193
0.360034	0.354322	-0.353909	1.66758	NaN	NaN	-1.73673	-2.00163	-1.42265	-1.04129			-	-			-	-				0.000707939	123.6	4807800000	1	92.445	-0.16273	0.0371413	0.192721	-2.23213	-1.24132	5	0.0374333	0.193477	-2.49898	-1.50428	5	0.04747	0.217876	-1.98272	-0.862585	5	0.0451113	0.212394	-1.58726	-0.495309	5	-1.98227	-1.81461	-0.05273
0.359559	0.505415	0.833677	1.27594	NaN	NaN	-1.07375	-1.34559	-1.50835	-2.26253			-	-			-	-				3.78e-29	206.63	442780000	1	152.13	-0.038163	0.0371413	0.192721	-1.56915	-0.578345	5	0.0374333	0.193477	-1.84294	-0.848246	5	0.04747	0.217876	-2.06842	-0.948279	5	0.0451113	0.212394	-2.80851	-1.71656	5	-1.45904	-0.631047	-1.33686
0.358211	1.32671	0.0124758	0.0364406	NaN	NaN	-0.61779	-0.893451	-0.944127	-0.916315			-	-			-	-				1.18e-89	301.59	2231800000	1	229.63	-0.72698	0.0371413	0.192721	-1.11319	-0.122385	5	0.0374333	0.193477	-1.3908	-0.396103	5	0.04747	0.217876	-1.5042	-0.384059	5	0.0451113	0.212394	-1.46229	-0.370339	5	-0.487556	-0.564333	-0.795891
0.350181	0.733063	0.250789	0.426921	NaN	NaN	-1.54287	-1.80066	-2.98172	-3.16888			-	-			-	-				3.02e-20	220.82	26571000000	1	220.82	-0.27798	0.0371413	0.192721	-2.03827	-1.04746	5	0.0374333	0.193477	-2.29801	-1.30331	5	0.04747	0.217876	-3.54179	-2.42165	5	0.0451113	0.212394	-3.71486	-2.62291	5	-1.50182	-2.04121	-1.58985
0.347876	1.01787	-0.242346	0.890979	NaN	NaN	-1.88075	-2.13261	-2.18095	-1.90147			-	-			-	-				3.51e-26	222.72	11960000000	1	63.76	-0.68377	0.0371413	0.192721	-2.37615	-1.38534	5	0.0374333	0.193477	-2.62996	-1.63526	5	0.04747	0.217876	-2.74102	-1.62088	5	0.0451113	0.212394	-2.44744	-1.35549	5	-1.79855	-2.05428	-1.8363
0.341188	0.897154	-0.0654722	0.195172	NaN	NaN	-2.32876	-2.56933	-2.51031	-2.39793			-	-			-	-				1.97e-23	195.83	134320000	1	102.52	0.85018	0.0371413	0.192721	-2.82416	-1.83335	5	0.0374333	0.193477	-3.06668	-2.07198	5	0.04747	0.217876	-3.07038	-1.95024	5	0.0451113	0.212394	-2.94391	-1.85196	5	-2.30054	-2.11151	-2.24718
0.340772	1.73158	-0.0378167	0.0981296	NaN	NaN	-0.863781	-1.1203	-0.985014	-0.908829			-	-			-	-				7.21e-10	158.59	995170000	1	109.82	-0.43978	0.0371413	0.192721	-1.35919	-0.368377	5	0.0374333	0.193477	-1.61765	-0.622956	5	0.04747	0.217876	-1.54508	-0.424946	5	0.0451113	0.212394	-1.45481	-0.362853	5	-1.04665	-0.798627	-0.824824
0.33731	0.816269	-0.255437	0.607129	NaN	NaN	-0.837039	-1.0906	-0.929784	-0.645766			-	-			-	-				2.43e-111	318.13	1138400000	1	279.05	-0.84009	0.0371413	0.192721	-1.33244	-0.341634	5	0.0374333	0.193477	-1.58795	-0.593255	5	0.04747	0.217876	-1.48985	-0.369715	5	0.0451113	0.212394	-1.19174	-0.0997893	5	-0.526663	-0.403767	-0.865625
0.333159	0.753523	-0.0414951	0.0387177	NaN	NaN	-2.01661	-2.25312	-2.24066	-2.15294			-	-			-	-				6.55e-48	227.73	1479400000	1	227.73	-0.089834	0.0371413	0.192721	-2.51202	-1.52121	5	0.0374333	0.193477	-2.75047	-1.75577	5	0.04747	0.217876	-2.80073	-1.68059	5	0.0451113	0.212394	-2.69892	-1.60697	5	-2.15348	-2.00967	-2.05696
0.330949	3.06816	0.00730997	0.0484068	NaN	NaN	-0.502341	-0.753657	-0.0841233	-0.0568593			-	-								0	454.8	4874700000	1	439.26	0.34779	0.0371413	0.192721	-0.997745	-0.00693685	5	0.0374333	0.193477	-1.251	-0.256309	5	0.04747	0.217876	-0.644192	0.475945	5	0.0451113	0.212394	-0.602836	0.489117	5	-0.582279	-0.383198	-0.449979
0.329597	2.43025	0.193002	2.07225	NaN	NaN	-1.18457	-1.42701	-0.411173	-0.559463			-	-				-				1.95e-26	192.15	17321000000	1	119.01	-0.014039	0.0371413	0.192721	-1.67997	-0.689165	5	0.0374333	0.193477	-1.92435	-0.929659	5	0.04747	0.217876	-0.971241	0.148896	5	0.0451113	0.212394	-1.10544	-0.0134868	5	-1.2583	-1.2416	-0.944409
0.327115	0.865668	-0.116255	0.106668	NaN	NaN	-1.36382	-1.58918	-0.446487	-0.0941218			-	-								1.39e-06	140.05	184060000	1	140.05	1.2989	0.0458584	0.214146	-1.95839	-0.76926	4	0.0599862	0.244921	-2.36863	-0.809732	3	0.058782	0.24245	-1.11964	0.226662	4	0.0730557	0.270288	-0.954299	0.766056	3	-1.37459	NaN	-1.45554
0.325909	0.84566	0.202126	1.09027	NaN	NaN	-2.03471	-2.2642	-2.7287	-2.87092			-	-			-	-				2.76e-07	131.5	556500000	1	109.44	-0.25641	0.0371413	0.192721	-2.53011	-1.53931	5	0.0374333	0.193477	-2.76155	-1.76685	5	0.04747	0.217876	-3.28877	-2.16863	5	0.0451113	0.212394	-3.4169	-2.32495	5	-1.90044	-2.2083	-1.96108
0.322189	1.55036	0.0234118	0.127184	NaN	NaN	-1.81333	-2.04179	-1.74389	-1.72143			-	-			-	-				4.59e-68	282.69	6940200000	1	198.38	-0.20036	0.0371413	0.192721	-2.30873	-1.31792	5	0.0374333	0.193477	-2.53914	-1.54444	5	0.04747	0.217876	-2.30395	-1.18382	5	0.0451113	0.212394	-2.26741	-1.17545	5	-1.59105	-1.77754	-1.72627
0.320455	0.958845	0.448364	2.08455	NaN	NaN	-0.756385	-0.991801	-0.694601	-0.965422			-	-			-	-				6.53e-06	123.63	50767000	1	123.63	-1.1751	0.0371413	0.192721	-1.25179	-0.260981	5	0.0599864	0.244921	-1.77125	-0.212353	3	0.04747	0.217876	-1.25467	-0.134532	5	0.0730559	0.270289	-1.8256	-0.105243	3	-0.564357	-1.01275	-0.866795
0.317248	1.11096	-0.223648	0.23104	NaN	NaN	-0.586678	-0.824172	-1.00857	-0.754459			-	-			-	-				1.55e-23	203.97	979720000	1	203.97	-1.7294	0.0371413	0.192721	-1.08208	-0.0912739	5	0.0374333	0.193477	-1.32152	-0.326824	5	0.04747	0.217876	-1.56864	-0.448501	5	0.0451113	0.212394	-1.30044	-0.208482	5	-0.551956	-0.726454	-0.287641
0.314476	0.18943	0.0547355	0.0280257	NaN	NaN	-2.93322	-3.18334	-2.08031	-2.11485			-	-			-	-				1.37e-36	217.58	1092900000	1	138.57	1.572	0.0458584	0.214146	-3.52778	-2.33865	4	0.0374333	0.193477	-3.68069	-2.68599	5	0.058782	0.24245	-2.75346	-1.40716	4	0.0451113	0.212394	-2.66083	-1.56887	5	NaN	-3.67747	-2.74105
0.311903	0.331125	0.0725585	0.0566586	NaN	NaN	-1.18444	-0.968045	-1.55212	-1.48024			-				-	-				1.87e-50	244.97	40575000	1	244.97	1.881	0.0458584	0.214146	-1.779	-0.589874	4	0.085858	0.293015	-2.22879	0.292698	2	0.077179	0.277811	-2.43624	-0.668003	3	0.105853	0.325351	-2.88011	-0.0803695	2	-0.593926	NaN	-1.24643
0.310206	0.769881	0.0887208	0.76239	NaN	NaN	-0.604811	-0.835481	-0.713228	-0.75983			-	-			-	-				2.81e-11	182.98	291080000	1	160.74	0.12455	0.0371413	0.192721	-1.10022	-0.109407	5	0.0374333	0.193477	-1.33283	-0.338133	5	0.04747	0.217876	-1.2733	-0.15316	5	0.0451113	0.212394	-1.30581	-0.213854	5	-0.464895	-0.493058	-0.443055
0.309501	3.4191	-0.031319	0.134075	NaN	NaN	-1.31484	-1.53693	-1.25608	-1.18438			-	-			-	-				2.06e-135	325.1	8161400000	1	308.45	-0.26051	0.0371413	0.192721	-1.81025	-0.81944	5	0.0374333	0.193477	-2.03428	-1.03959	5	0.04747	0.217876	-1.81615	-0.696011	5	0.0451113	0.212394	-1.73036	-0.638404	5	-1.38104	-1.23757	-1.22855
0.309306	0.919406	0.23026	0.794416	NaN	NaN	-0.62235	-0.631156	-0.553978	-0.628965			-									4.27e-37	192.62	962600000	1	192.62	-0.44984	0.0371413	0.192721	-1.11775	-0.126946	5	0.0599862	0.244921	-1.4106	0.148291	3	0.04747	0.217876	-1.11405	0.00609032	5	0.0730557	0.270288	-1.48914	0.231213	3	-0.581537	-0.265373	-0.683222
0.306149	0.877559	-0.00491053	0.0083585	NaN	NaN	-0.976971	-1.19968	-1.19192	-1.1459			-	-			-	-				1.55e-26	199.37	1280800000	1	137.79	0.34986	0.0371413	0.192721	-1.47238	-0.481567	5	0.0374333	0.193477	-1.69702	-0.702329	5	0.04747	0.217876	-1.75199	-0.631856	5	0.0451113	0.212394	-1.69188	-0.599922	5	-1.28685	-1.31078	-0.768825
0.303395	0.828283	0.335004	0.801287	NaN	NaN	-0.674374	-0.917771	-0.815486	-0.972761			-	-			-	-				3.41e-29	198.31	176530000	1	198.31	-0.73315	0.0458584	0.214146	-1.26894	-0.0798103	4	0.0599862	0.244921	-1.69722	-0.138323	3	0.058782	0.24245	-1.48864	-0.142337	4	0.0730557	0.270288	-1.83294	-0.112584	3	-0.774828	NaN	-0.871134
0.301775	1.0932	0.869984	0.875492	NaN	NaN	-2.30064	-2.52799	-0.269912	-1.10955			-	-				-				0.000214086	117.28	4600900000	1	52.837	-0.11092	0.0371413	0.192721	-2.79605	-1.80524	5	0.0460981	0.214705	-3.1241	-1.93187	4	0.04747	0.217876	-0.829981	0.290156	5	0.0557777	0.236173	-1.76528	-0.453833	4	-2.19618	-2.51217	-1.98883
0.301374	2.75388	0.181073	1.37854	NaN	NaN	-0.971769	-1.19004	-0.496631	-0.632964			-	-				-				8.4e-36	224.43	3829900000	1	192.4	0.12523	0.0371413	0.192721	-1.46717	-0.476365	5	0.0374333	0.193477	-1.68739	-0.692695	5	0.04747	0.217876	-1.0567	0.0634378	5	0.0451113	0.212394	-1.17894	-0.0869876	5	-0.789172	-1.07059	-0.914264
0.299277	0.320737	0.0846309	0.110471	NaN	NaN	-2.37629	-2.57693	-1.63363	-1.67045			-	-			-	-				1.15e-08	145.92	1076000000	1	54.402	-0.60887	0.0371413	0.192721	-2.87169	-1.88088	5	0.0374333	0.193477	-3.07428	-2.07958	5	0.04747	0.217876	-2.1937	-1.07356	5	0.0451113	0.212394	-2.21642	-1.12447	5	-2.12098	-2.34266	-2.16718
0.295101	0.456787	0.435709	1.37248	NaN	NaN	-2.00391	-2.20478	-2.30767	-2.67604			-	-			-	-				4.07e-24	175.16	292940000	1	175.16	-0.71916	0.0371413	0.192721	-2.49932	-1.50851	5	0.0374333	0.193477	-2.70213	-1.70743	5	0.04747	0.217876	-2.86774	-1.7476	5	0.0451113	0.212394	-3.22202	-2.13007	5	-2.75653	-2.34403	-1.66795
0.292978	2.55903	-0.165956	1.3375	NaN	NaN	-1.00631	-1.21631	-1.30872	-1.10789			-	-			-	-				0	496.26	7682400000	1	335.2	-0.20388	0.0371413	0.192721	-1.50171	-0.510906	5	0.0374333	0.193477	-1.71365	-0.718957	5	0.04747	0.217876	-1.86879	-0.748654	5	0.0451113	0.212394	-1.65386	-0.561911	5	-1.08733	-0.983573	-0.796428
0.292438	1.70472	0.684459	5.51273	NaN	NaN	-0.748154	-0.960519	-0.301053	-0.920198			-	-	+	+		-				9.96e-35	211.25	3042600000	1	102.6	-0.38952	0.0371413	0.192721	-1.24356	-0.252749	5	0.0374333	0.193477	-1.45787	-0.463171	5	0.04747	0.217876	-0.861122	0.259015	5	0.0451113	0.212394	-1.46617	-0.374221	5	-0.708676	-0.868959	-0.460575
0.290019	0.543056	0.37439	3.16332	NaN	NaN	-1.08433	-1.29068	0.815501	0.485857			-	-	++	+	+					1.01e-27	207.3	5257200000	1	202.27	-0.20291	0.0371413	0.192721	-1.57974	-0.58893	5	0.0374333	0.193477	-1.78802	-0.793328	5	0.04747	0.217876	0.255433	1.37557	5	0.0451113	0.212394	-0.06012	1.03183	5	-0.786679	-0.924698	-0.82976
0.285559	0.207388	-4.31562	2.53655	NaN	NaN	-1.14328	-1.7169	-0.925208	3.10473			-	-		+	-	+				0.00151359	95.022	796100000	1	87.026	0.49774	0.0458584	0.214146	-1.73785	-0.548718	4	0.0599862	0.244921	-2.49635	-0.937457	3	0.058782	0.24245	-1.59836	-0.252059	4	0.0730557	0.270288	2.24455	3.9649	3	-1.43651	NaN	-2.31574
0.284358	0.831075	0.215644	1.17944	NaN	NaN	-1.96299	-2.15421	-1.75443	-1.91581			-	-			-	-				7.8e-13	166.7	313220000	1	115.75	-0.15908	0.0371413	0.192721	-2.45839	-1.46758	5	0.0374333	0.193477	-2.65156	-1.65686	5	0.04747	0.217876	-2.3145	-1.19437	5	0.0451113	0.212394	-2.46179	-1.36983	5	-1.45407	-2.08159	-1.95951
0.281909	0.564451	0.333351	0.592755	NaN	NaN	-1.51483	-1.70874	-2.73977	-3.00746			-	-			-	-				1.89e-45	261.72	23959000000	1	261.72	0.49568	0.0371413	0.192721	-2.01023	-1.01942	5	0.0374333	0.193477	-2.20609	-1.21139	5	0.04747	0.217876	-3.29984	-2.1797	5	0.0451113	0.212394	-3.55344	-2.46149	5	-1.50977	-2.01472	-1.55352
0.274053	1.33332	-0.00220575	0.0136896	NaN	NaN	-2.24162	-2.42005	-2.51976	-2.46784			-	-			-	-				7.96e-113	315.82	4373600000	1	279.19	-0.27401	0.0371413	0.192721	-2.73703	-1.74622	5	0.0374333	0.193477	-2.9174	-1.9227	5	0.04747	0.217876	-3.07983	-1.95969	5	0.0451113	0.212394	-3.01382	-1.92187	5	-2.26489	-2.18555	-2.05665
0.271754	0.606353	0.464895	0.832837	NaN	NaN	-0.651368	-0.845365	-0.478464	-0.886431			-	-				-				3.54e-12	167.11	1257600000	1	150.49	-0.21448	0.0371413	0.192721	-1.14677	-0.155964	5	0.0374333	0.193477	-1.34271	-0.348017	5	0.04747	0.217876	-1.03853	0.0816045	5	0.0451113	0.212394	-1.43241	-0.340454	5	-0.601404	-0.710934	-0.691756
0.2697	0.80408	-0.123148	0.331424	NaN	NaN	-1.19749	-1.38346	-1.43631	-1.27562			-	-			-	-				8.98e-159	357.75	3134700000	1	245.61	0.11709	0.0371413	0.192721	-1.69289	-0.702081	5	0.0374333	0.193477	-1.88081	-0.886113	5	0.04747	0.217876	-1.99638	-0.876246	5	0.0451113	0.212394	-1.82159	-0.729641	5	-0.763405	-1.36282	-1.32983
0.269483	1.11763	0.252735	1.25869	NaN	NaN	-1.53407	-1.66301	-1.23806	-1.50511			-	-			-	-				0.00267956	90.761	134060000	1	76.17	-1.7756	0.0371413	0.192721	-2.02948	-1.03867	5	0.0460981	0.214705	-2.25912	-1.06689	4	0.04747	0.217876	-1.79813	-0.677989	5	0.0557777	0.236173	-2.16084	-0.849392	4	-1.56026	-1.65579	-1.4174
0.264456	0.441382	1.78266	0.787425	NaN	NaN	-1.61659	-1.79296	-0.94518	-2.6108			-	-			-	-				1.1e-289	439.35	3301600000	1	338.97	0.39484	0.0371413	0.192721	-2.112	-1.12119	5	0.0374333	0.193477	-2.29031	-1.29562	5	0.04747	0.217876	-1.50525	-0.385112	5	0.0451113	0.212394	-3.15678	-2.06482	5	-1.95405	-1.58965	-0.740679
0.26217	0.811174	0.160568	0.608199	NaN	NaN	-3.62792	-3.77972	-4.05802	-4.152			-	-			-	-				6.82e-78	281.36	5305800000	1	279.93	-0.25351	0.0371413	0.192721	-4.12333	-3.13252	5	0.0374333	0.193477	-4.27706	-3.28237	5	0.04747	0.217876	-4.61809	-3.49795	5	0.0451113	0.212394	-4.69798	-3.60603	5	-3.41237	-3.68923	-3.67783
0.261425	1.32519	0.0717999	0.75816	NaN	NaN	-0.554231	-0.739599	-0.801598	-0.831449			-	-			-	-				1.96e-78	283.1	1454400000	1	283.1	-0.91089	0.0371413	0.192721	-1.04963	-0.0588262	5	0.0374333	0.193477	-1.23695	-0.242251	5	0.04747	0.217876	-1.36167	-0.24153	5	0.0451113	0.212394	-1.37743	-0.285472	5	-0.37585	-0.644075	-0.426528
0.259242	0.361565	0.000763804	0.00157936	NaN	NaN	-1.00036	-1.20224	-0.457823	-0.381137			-	-								1.14e-170	370.12	3321100000	1	333.77	0.4575	0.0371413	0.192721	-1.49577	-0.504957	5	0.0460981	0.214705	-1.79835	-0.606123	4	0.04747	0.217876	-1.01789	0.102246	5	0.0557776	0.236173	-1.03686	0.274585	4	-0.41913	-0.826183	-0.919176
0.257105	1.19925	0.176115	1.28829	NaN	NaN	-0.910957	-1.08829	-0.573152	-0.704254			-	-			-	-				5.97e-216	388.65	3538800000	1	388.65	0.064026	0.0371413	0.192721	-1.40636	-0.415553	5	0.0374333	0.193477	-1.58563	-0.590938	5	0.04747	0.217876	-1.13322	-0.0130838	5	0.0451113	0.212394	-1.25023	-0.158277	5	-0.746742	-0.860559	-0.816289
0.25405	1.76883	-0.343336	0.300697	NaN	NaN	-0.689554	-0.866478	-0.870998	-0.503267			-	-			-					2.71e-54	243.18	366920000	1	243.18	0.22844	0.0371413	0.192721	-1.18496	-0.19415	5	0.0374333	0.193477	-1.36383	-0.36913	5	0.04747	0.217876	-1.43107	-0.31093	5	0.0451113	0.212394	-1.04924	0.0427095	5	-0.514415	-0.59182	-0.695317
0.251779	0.562155	-0.103988	0.11434	NaN	NaN	-0.879767	-1.05244	-0.887893	-0.749025			-	-			-	-				1.28e-06	119.96	4219100000	1	107.61	-0.28339	0.0371413	0.192721	-1.37517	-0.384362	5	0.0374333	0.193477	-1.54978	-0.555088	5	0.04747	0.217876	-1.44796	-0.327824	5	0.0451113	0.212394	-1.295	-0.203049	5	-0.679298	-1.1799	-0.371638
0.251583	0.134204	-0.377789	0.161188	NaN	NaN	-1.31955	-1.48713	-1.91229	-1.50496			-	-			-	-				4.09e-141	319.78	1163700000	1	319.78	0.79408	0.0371413	0.192721	-1.81495	-0.824145	5	0.0374333	0.193477	-1.98448	-0.989782	5	0.04747	0.217876	-2.47236	-1.35223	5	0.0451113	0.212394	-2.05093	-0.958981	5	-3.26385	-0.0356776	-2.1903
0.251135	1.5643	0.22503	2.79825	NaN	NaN	-0.678526	-0.852833	-0.0963946	-0.277334			-	-								6.44e-118	307.25	10229000000	1	139.46	-2.19	0.0371413	0.192721	-1.17393	-0.183121	5	0.0374333	0.193477	-1.35018	-0.355485	5	0.04747	0.217876	-0.656463	0.463674	5	0.0451113	0.212394	-0.82331	0.268643	5	-0.676763	-0.70315	-0.429678
0.250954	1.71725	-0.429615	0.880935	NaN	NaN	-0.988527	-1.15921	-1.80432	-1.34809			-	-			-	-				9.01e-14	157.91	418390000	1	132.05	3.6886	0.0371413	0.192721	-1.48393	-0.493123	5	0.0374333	0.193477	-1.65656	-0.66186	5	0.04747	0.217876	-2.36439	-1.24425	5	0.0451113	0.212394	-1.89407	-0.802117	5	-0.976509	-0.782972	-0.836016
0.247116	0.720998	0.147279	0.546574	NaN	NaN	-2.64333	-2.79195	-2.6919	-2.78189			-	-			-	-				1.65e-50	236.3	501830000	1	127.76	0.40393	0.0371413	0.192721	-3.13874	-2.14793	5	0.0374333	0.193477	-3.2893	-2.29461	5	0.04747	0.217876	-3.25197	-2.13183	5	0.0451113	0.212394	-3.32787	-2.23592	5	-2.33714	-3.03586	-2.77007
0.246981	0.670217	0.0536794	0.0869305	NaN	NaN	-0.551598	-0.696025	-0.564365	-0.538207			-				-					1.12e-53	217.82	564810000	1	217.82	-0.44355	0.0371413	0.192721	-1.047	-0.056194	5	0.0599861	0.244921	-1.47547	0.0834218	3	0.04747	0.217876	-1.12443	-0.00429644	5	0.0730556	0.270288	-1.39838	0.32197	3	-0.769138	-0.218789	-0.407789
0.246397	2.11233	-0.091712	0.657458	NaN	NaN	-1.58512	-1.74487	-2.65876	-2.52034			-	-			-	-				2.43e-19	201.33	23425000000	1	51.771	-0.43445	0.0371413	0.192721	-2.08053	-1.08972	5	0.0374333	0.193477	-2.24221	-1.24752	5	0.04747	0.217876	-3.21883	-2.0987	5	0.0451113	0.212394	-3.06631	-1.97436	5	-1.49712	-1.62	-1.49598
0.24606	0.315023	-0.321643	0.216036	NaN	NaN	-0.51932	-0.690631	-0.931593	-0.584228			-	-			-	-				5.03e-34	182.26	3449500000	1	42.718	-2.8742	0.0371413	0.192721	-1.01472	-0.0239155	5	0.0374333	0.193477	-1.18798	-0.193283	5	0.04747	0.217876	-1.49166	-0.371525	5	0.0451113	0.212394	-1.1302	-0.0382514	5	-1.08938	-0.2908	-0.874336
0.245992	0.9478	0.05238	0.086531	NaN	NaN	-0.84795	-0.919442	-1.26888	-1.29837			-	-			-	-				1.17e-144	317.53	280010000	1	317.53	-0.19342	0.0371413	0.192721	-1.34335	-0.352546	5	0.0599862	0.244921	-1.69889	-0.139994	3	0.04747	0.217876	-1.82895	-0.708809	5	0.0730557	0.270288	-2.15855	-0.438194	3	-0.742291	-0.752842	-0.641376
0.245285	1.62691	0.105818	0.867171	NaN	NaN	-1.44446	-1.60473	-1.35578	-1.41464			-	-			-	-				0	450.88	21072000000	1	360.85	1.6521	0.0371413	0.192721	-1.93987	-0.949057	5	0.0374333	0.193477	-2.10208	-1.10738	5	0.04747	0.217876	-1.91585	-0.795715	5	0.0451113	0.212394	-1.96062	-0.868663	5	-1.4925	-1.51552	-1.29025
0.243586	0.920183	-0.103051	0.321323	NaN	NaN	-3.2487	-3.38725	-3.27906	-3.12582			-	-			-	-				2.07e-11	168.9	18469000000	1	152.54	-0.41496	0.0371413	0.192721	-3.7441	-2.7533	5	0.0374333	0.193477	-3.8846	-2.8899	5	0.04747	0.217876	-3.83913	-2.71899	5	0.0451113	0.212394	-3.6718	-2.57985	5	-3.14614	-3.36143	-3.15334
0.238868	0.362269	-0.234421	0.313669	NaN	NaN	-0.644433	-0.633953	-0.407532	-0.0781969			-									1.99e-08	144.42	115540000	1	144.42	-0.57773	0.0458584	0.214146	-1.239	-0.0498695	4	0.0599862	0.244921	-1.4134	0.145495	3	0.0587819	0.24245	-1.08068	0.265617	4	0.0730557	0.270288	-0.938374	0.78198	3	-0.77704	-0.524189	-0.0563402
0.238012	0.183349	0.145718	0.0975165	NaN	NaN	-0.832252	-0.992506	-1.76881	-1.87156			-	-			-	-				1.56e-25	189.82	6490200000	1	78.334	0.28083	0.0371413	0.192721	-1.32766	-0.336847	5	0.0374333	0.193477	-1.48985	-0.495158	5	0.0587819	0.24245	-2.44196	-1.09566	4	0.0451113	0.212394	-2.41754	-1.32559	5	-1.66786	-1.25771	-1.37252
0.233465	1.10655	-0.0302157	0.0471472	NaN	NaN	-1.31452	-1.46512	-1.40139	-1.32982			-	-			-	-				1.18e-05	122.86	3128400000	1	61.48	-1.3119	0.0371413	0.192721	-1.80992	-0.819111	5	0.0374333	0.193477	-1.96246	-0.967769	5	0.04747	0.217876	-1.96146	-0.841318	5	0.0451113	0.212394	-1.87579	-0.783839	5	-1.07987	-1.48598	-1.36112
0.231716	0.35759	0.158868	0.824195	NaN	NaN	-0.499082	-0.657131	-0.746179	-0.859677			-	-			-	-				2.86e-193	393.72	15824000000	1	393.72	0.156	0.0371413	0.192721	-0.994486	-0.00367721	5	0.0374333	0.193477	-1.15448	-0.159783	5	0.04747	0.217876	-1.30625	-0.186111	5	0.0451113	0.212394	-1.40565	-0.3137	5	-0.902731	-0.843235	0.577487
0.230626	0.21268	0.0278917	0.034196	NaN	NaN	-1.32866	-1.49834	-2.21897	-2.22822			-	-			-	-				1.03e-104	302.85	454950000	1	302.2	0.32591	0.0458584	0.214146	-1.92322	-0.734096	4	0.0374333	0.193477	-1.99568	-1.00099	5	0.058782	0.24245	-2.89212	-1.54582	4	0.0451113	0.212394	-2.7742	-1.68225	5	NaN	-0.959889	-0.778919
0.230085	0.842157	-0.10009	0.381423	NaN	NaN	-0.983168	-1.13429	-0.834774	-0.699975			-	-			-	-				9.57e-36	223.87	510520000	1	160.72	-0.06258	0.0371413	0.192721	-1.47857	-0.487763	5	0.0374333	0.193477	-1.63163	-0.636937	5	0.04747	0.217876	-1.39484	-0.274706	5	0.0451113	0.212394	-1.24595	-0.153999	5	-1.1386	-1.17757	-0.916899
0.229534	0.28257	0.637275	0.731927	NaN	NaN	-2.17192	-2.30927	-1.44526	-2.01197			-	-			-	-				1.76e-155	343.68	27011000000	1	192.12	-1.2712	0.0371413	0.192721	-2.66733	-1.67652	5	0.0374333	0.193477	-2.80661	-1.81192	5	0.04747	0.217876	-2.00533	-0.885193	5	0.0451113	0.212394	-2.55794	-1.46599	5	-2.43519	-1.92976	-2.86223
0.226989	1.9409	-0.368603	0.520615	NaN	NaN	-1.26689	-1.41193	-3.27911	-2.87184			-	-			-	-				1.51e-27	201.38	4860400000	1	141.54	-0.47365	0.0371413	0.192721	-1.76229	-0.771484	5	0.0374333	0.193477	-1.90928	-0.914584	5	0.04747	0.217876	-3.83918	-2.71904	5	0.0451113	0.212394	-3.41781	-2.32586	5	-1.26213	-1.21589	-1.29893
0.225051	1.15313	-0.0977889	0.5015	NaN	NaN	-0.61596	-0.76644	-0.898868	-0.765861			-	-			-	-				0.000475365	121.53	19538000000	1	69.825	0.31546	0.0371413	0.192721	-1.11136	-0.120556	5	0.0374333	0.193477	-1.26379	-0.269092	5	0.04747	0.217876	-1.45894	-0.3388	5	0.0451113	0.212394	-1.31184	-0.219884	5	-0.454444	-0.786462	-0.469305
0.222506	0.838259	0.559059	1.37591	NaN	NaN	-0.536114	-0.607758	-0.43938	-0.805822			-	-				-				5.27e-185	365.57	573540000	1	307.57	0.20323	0.0371413	0.192721	-1.03152	-0.0407101	5	0.0460981	0.214705	-1.20387	-0.0116419	4	0.04747	0.217876	-0.999448	0.120689	5	0.0557777	0.236173	-1.46154	-0.1501	4	-0.244983	-0.213815	-0.713476
0.221749	0.978077	0.0101211	0.0812162	NaN	NaN	-0.663229	-0.810077	-0.392461	-0.365918			-	-								5.68e-10	159.09	339230000	1	159.09	-0.51682	0.0371413	0.192721	-1.15863	-0.167825	5	0.0374333	0.193477	-1.30743	-0.312729	5	0.04747	0.217876	-0.952529	0.167608	5	0.0451113	0.212394	-0.911894	0.180059	5	-0.467424	-0.720633	-0.500498
0.218503	0.599235	0.0459622	0.0918579	NaN	NaN	-1.27168	-1.42799	-1.36982	-1.38015			-	-			-	-				1.81e-29	171.68	280310000	1	171.68	-0.34063	0.0458584	0.214146	-1.86624	-0.677117	4	0.0374333	0.193477	-1.92534	-0.930641	5	0.058782	0.24245	-2.04297	-0.696667	4	0.0451113	0.212394	-1.92613	-0.834178	5	-1.34042	-1.23144	NaN
0.21602	0.803533	0.061679	0.115717	NaN	NaN	-1.46831	-1.6008	-1.46298	-1.47892			-	-			-	-				5.3e-105	268.76	4732700000	1	268.76	0.48814	0.0371413	0.192721	-1.96372	-0.972909	5	0.0374333	0.193477	-2.09815	-1.10345	5	0.04747	0.217876	-2.02305	-0.90291	5	0.0451113	0.212394	-2.0249	-0.932948	5	-1.24757	-1.45738	-1.39626
0.215942	0.323669	-0.194164	0.465232	NaN	NaN	-0.953912	-1.03478	-0.316575	-0.232794			-	-								1.87e-19	146.5	182940000	1	146.5	0.39448	0.0371413	0.192721	-1.44932	-0.458508	5	0.0599863	0.244921	-1.81423	-0.255335	3	0.04747	0.217876	-0.876644	0.243493	5	0.0730558	0.270288	-1.09297	0.627384	3	-0.860511	-1.74891	-1.06521
0.214869	0.454336	-0.0346732	0.0809754	NaN	NaN	-2.33844	-2.52468	-1.95193	-1.90473			-	-			-	-				1.43e-83	264.63	306350000	1	264.63	-0.15272	0.0599259	0.244798	-3.11749	-1.55938	3	0.0374333	0.193477	-3.02202	-2.02733	5	0.0771789	0.277811	-2.83605	-1.06781	3	0.0451113	0.212394	-2.45071	-1.35875	5	-2.39539	-2.80629	-2.13486
0.213779	0.917685	-0.486347	3.10031	NaN	NaN	-0.856109	-0.993313	-1.6623	-1.1527			-	-		+	-	-				4.64e-14	157.68	146700000	1	134.25	-0.68286	0.0371413	0.192721	-1.35151	-0.360705	5	0.0374333	0.193477	-1.49066	-0.495965	5	0.04747	0.217876	-2.22236	-1.10223	5	0.0451113	0.212394	-1.69868	-0.606726	5	-0.771784	-1.05433	-0.520378
0.210909	0.65103	-0.272834	1.16995	NaN	NaN	-2.27655	-2.39522	-2.38102	-2.07109			-	-			-	-				1.23e-09	146.26	3311900000	1	59.198	0.0057802	0.0371413	0.192721	-2.77196	-1.78115	5	0.0374333	0.193477	-2.89257	-1.89787	5	0.04747	0.217876	-2.94109	-1.82095	5	0.0451113	0.212394	-2.61707	-1.52512	5	-2.30326	-2.17718	-2.161
0.206591	0.796157	0.0308168	0.0728295	NaN	NaN	-0.945224	-1.07467	-0.79281	-0.78351			-	-			-	-				1.85e-17	186.27	4179600000	1	83.243	0.28247	0.0371413	0.192721	-1.44063	-0.449819	5	0.0374333	0.193477	-1.57202	-0.577327	5	0.04747	0.217876	-1.35288	-0.232742	5	0.0451113	0.212394	-1.32949	-0.237534	5	-1.0207	-0.864194	-1.21136
0.206502	0.646487	0.190789	1.67708	NaN	NaN	-0.603752	-0.736928	-0.222545	-0.369923			-	-								4.02e-06	146.88	97267000000	1	122.33	0.089814	0.0371413	0.192721	-1.09916	-0.108348	5	0.0374333	0.193477	-1.23428	-0.23958	5	0.04747	0.217876	-0.782613	0.337523	5	0.0451113	0.212394	-0.915899	0.176054	5	-0.767817	-0.491866	-0.540468
0.203742	0.203388	-0.561956	2.18301	NaN	NaN	-1.30482	-1.42759	-0.82281	-0.246243			-	-		+	-					0.000950797	103.74	302770000	1	84.568	-0.15776	0.0371413	0.192721	-1.80023	-0.809419	5	0.0374333	0.193477	-1.92493	-0.930238	5	0.04747	0.217876	-1.38288	-0.262741	5	0.0451113	0.212394	-0.79222	0.299733	5	-0.6437	-1.35211	-1.03432
0.203054	0.455708	0.0515799	0.0952786	NaN	NaN	-0.950571	-1.07664	-0.57345	-0.585413			-	-			-	-				5.29e-85	282.97	1134300000	1	152.33	1.1404	0.0371413	0.192721	-1.44598	-0.455167	5	0.0374333	0.193477	-1.57398	-0.579289	5	0.04747	0.217876	-1.13352	-0.0133812	5	0.0451113	0.212394	-1.13139	-0.0394365	5	-1.22041	-1.16516	-0.396327
0.203026	0.664502	0.0969449	0.294662	NaN	NaN	-0.740124	-0.868511	-0.635891	-0.690855			-	-			-	-				1.94e-19	203.03	392080000	1	203.03	0.092259	0.0371413	0.192721	-1.23553	-0.24472	5	0.0374333	0.193477	-1.36586	-0.371163	5	0.04747	0.217876	-1.19596	-0.0758231	5	0.0451113	0.212394	-1.23683	-0.144878	5	-0.673847	-1.12522	-0.410944
0.202475	1.46568	0.29871	2.33247	NaN	NaN	-1.52543	-1.64454	-1.6179	-1.85962			-	-			-	-				7.19e-25	209.67	1496200000	1	209.67	-0.075379	0.0371413	0.192721	-2.02083	-1.03002	5	0.0374333	0.193477	-2.14189	-1.14719	5	0.04747	0.217876	-2.17797	-1.05784	5	0.0451113	0.212394	-2.40559	-1.31364	5	-1.34964	-1.60188	-1.52613
0.198509	0.818101	0.253285	0.888204	NaN	NaN	-0.549587	-0.675851	-0.0647603	-0.272931			-	-								8.74e-10	141.37	2464100000	1	124.12	-0.38818	0.0371413	0.192721	-1.04499	-0.0541823	5	0.0374333	0.193477	-1.1732	-0.178503	5	0.04747	0.217876	-0.624829	0.495308	5	0.0451113	0.212394	-0.818908	0.273045	5	-0.526728	-0.517101	-0.182284
0.195974	0.531192	0.394832	3.00126	NaN	NaN	-0.86364	-0.984019	-0.841442	-1.18007			-	-		+	-	-				2.28e-12	134.81	788680000	1	122.45	3.0215	0.0371413	0.192721	-1.35904	-0.368235	5	0.0374333	0.193477	-1.48137	-0.486671	5	0.04747	0.217876	-1.40151	-0.281374	5	0.0451113	0.212394	-1.72604	-0.634089	5	-0.740334	-0.806178	-0.848594
0.195363	0.243188	-0.00298601	0.00559857	NaN	NaN	-1.60469	-1.71623	-1.77409	-1.7346			-	-			-	-				1.27e-07	150.09	115800000	1	130.23	-0.73932	0.0371413	0.192721	-2.10009	-1.10928	5	0.0374333	0.193477	-2.21357	-1.21888	5	0.0587819	0.24245	-2.44724	-1.10094	4	0.0451113	0.212394	-2.28058	-1.18863	5	-0.690534	-1.69468	-2.22124
0.19488	0.806059	-0.106	0.36006	NaN	NaN	-0.641768	-0.763592	-0.615155	-0.476103			-	-			-					2.26e-202	391.92	3128200000	1	97.395	-0.080128	0.0371413	0.192721	-1.13717	-0.146364	5	0.0374333	0.193477	-1.26094	-0.266244	5	0.04747	0.217876	-1.17522	-0.0550863	5	0.0451113	0.212394	-1.02208	0.0698735	5	-0.691842	-0.706817	-0.455096
0.19234	0.383618	-0.030724	0.0778199	NaN	NaN	-0.97569	-1.18809	-0.71937	-0.662815			-	-				-				0.00218062	89.047	43767000	1	76.221	0.068819	0.0599259	0.244798	-1.75475	-0.196635	3	0.0460981	0.214705	-1.78421	-0.591976	4	0.0771789	0.277811	-1.60349	0.164748	3	0.0557776	0.236173	-1.31854	-0.00709347	4	-0.675031	-1.37111	-0.849898
0.191222	0.504245	0.207053	1.47057	NaN	NaN	-0.634421	-0.752888	0.178691	0.0131937			-	-								4.58e-159	324.38	657570000	1	285.82	0.20571	0.0371413	0.192721	-1.12983	-0.139017	5	0.0374333	0.193477	-1.25024	-0.25554	5	0.04747	0.217876	-0.381377	0.73876	5	0.0451113	0.212394	-0.532783	0.55917	5	-0.255656	-1.10583	-0.659324
0.190571	0.549556	-0.104606	0.105436	NaN	NaN	-1.01445	-1.12806	-1.68981	-1.54523			-	-			-	-				3.38e-131	324.79	1225300000	1	201.18	-0.89557	0.0371413	0.192721	-1.50985	-0.519042	5	0.0374333	0.193477	-1.62541	-0.630716	5	0.04747	0.217876	-2.24988	-1.12974	5	0.0451113	0.212394	-2.09121	-0.999254	5	-1.09037	-0.786456	-0.715453
0.190237	0.434052	-0.390986	2.90948	NaN	NaN	-2.67771	-2.77247	-3.15458	-2.72669			-	-		+	-	-				0.000992957	101.97	658200000	1	82.261	0.22296	0.0371413	0.192721	-3.17312	-2.18231	5	0.0374333	0.193477	-3.26982	-2.27512	5	0.04747	0.217876	-3.71465	-2.59452	5	0.0451113	0.212394	-3.27267	-2.18072	5	-2.77105	-2.58324	-2.71401
0.188982	0.271735	0.582207	0.671364	NaN	NaN	-0.894055	-0.800469	0.231058	-0.177613			-	-								8.17e-52	229.15	246000000	1	147.52	-1.0224	0.0371413	0.192721	-1.38946	-0.398651	5	0.0599862	0.244921	-1.57992	-0.0210218	3	0.04747	0.217876	-0.32901	0.791126	5	0.0730557	0.270288	-1.03779	0.682565	3	-0.963594	-0.192539	-0.790216
0.187945	0.710632	0.333839	1.70755	NaN	NaN	-0.709856	-0.8244	-0.375607	-0.658855			-	-				-				4.28e-40	212.85	401620000	1	210.47	-0.18143	0.0371413	0.192721	-1.20526	-0.214451	5	0.0374333	0.193477	-1.32175	-0.327052	5	0.04747	0.217876	-0.935675	0.184462	5	0.0451113	0.212394	-1.20483	-0.112879	5	-0.54705	-0.898046	-0.374312
0.187426	0.623131	0.393532	2.54809	NaN	NaN	-1.36674	-1.4362	-0.206213	-0.575701			-	-								0.000281294	88.056	158760000	1	77.358	-0.20038	0.0371413	0.192721	-1.86214	-0.871333	5	0.0460981	0.214705	-2.03232	-0.840084	4	0.04747	0.217876	-0.766282	0.353855	5	0.0557777	0.236173	-1.23142	0.0800201	4	-1.23453	-1.7246	-1.19345
0.186569	0.301816	0.0952253	0.276432	NaN	NaN	-0.799548	-0.722549	-0.804318	-0.762981			-				-					0.00715575	69.598	803820000	1	69.598	2.8018	0.0371413	0.192721	-1.29495	-0.304143	5	0.0599862	0.244921	-1.502	0.0568985	3	0.04747	0.217876	-1.36439	-0.24425	5	0.0730557	0.270288	-1.62316	0.0971963	3	-0.522328	-0.891216	-1.17685
0.186079	1.93523	0.125647	0.950229	NaN	NaN	-0.527928	-0.642746	-0.335831	-0.420168			-	-								2.13e-95	301.75	3338100000	1	220.85	0.88243	0.0371413	0.192721	-1.02333	-0.0325239	5	0.0374333	0.193477	-1.14009	-0.145398	5	0.04747	0.217876	-0.8959	0.224237	5	0.0451113	0.212394	-0.966144	0.125809	5	-0.341243	-0.508973	-0.419675
0.186026	0.281775	0.0639005	0.284193	NaN	NaN	-2.08862	-2.18599	-2.31848	-2.33109			-	-			-	-				1.87e-28	208.79	2492800000	1	135.02	-0.51352	0.0371413	0.192721	-2.58403	-1.59322	5	0.0374333	0.193477	-2.68334	-1.68864	5	0.04747	0.217876	-2.87854	-1.75841	5	0.0451113	0.212394	-2.87706	-1.78511	5	-2.14999	-2.15723	-1.86851
0.185765	0.3111	-0.0291727	0.0441316	NaN	NaN	-1.16334	-1.27077	-1.58416	-1.51242			-	-			-	-				8.76e-29	203.89	388640000	1	203.89	-0.70833	0.0371413	0.192721	-1.65874	-0.667932	5	0.0374333	0.193477	-1.76812	-0.773427	5	0.04747	0.217876	-2.14422	-1.02409	5	0.0451113	0.212394	-2.05839	-0.96644	5	-0.493405	-1.14494	-1.19916
0.184949	1.17125	0.520665	3.64692	NaN	NaN	-1.47906	-1.58222	-1.70017	-2.15369			-	-		+	-	-				1.5e-265	424.99	29777000000	1	235.22	0.28899	0.0371413	0.192721	-1.97447	-0.983661	5	0.0374333	0.193477	-2.07956	-1.08487	5	0.04747	0.217876	-2.26024	-1.1401	5	0.0451113	0.212394	-2.69967	-1.60771	5	-1.38597	-1.57678	-1.27004
0.182416	0.905641	-0.113056	0.422141	NaN	NaN	-1.97488	-2.07012	-3.47303	-3.30899			-	-			-	-				2.01e-36	227.47	674960000	1	153.85	0.1974	0.0371413	0.192721	-2.47029	-1.47948	5	0.0374333	0.193477	-2.56747	-1.57277	5	0.04747	0.217876	-4.0331	-2.91297	5	0.0451113	0.212394	-3.85497	-2.76301	5	-1.7879	-2.01454	-1.85483
0.181404	0.146187	-0.41885	1.51703	NaN	NaN	-2.60508	-2.69234	-4.91538	-4.44959			-	-			-	-				9.49e-17	192.44	8823700000	1	54.005	0.37586	0.0371413	0.192721	-3.10048	-2.10968	5	0.0374333	0.193477	-3.18969	-2.19499	5	0.04747	0.217876	-5.47545	-4.35531	5	0.0451113	0.212394	-4.99557	-3.90362	5	-2.17041	-1.94128	-2.63041
0.179893	2.46673	0.0225878	0.131849	NaN	NaN	-0.509696	-0.618901	-0.354096	-0.339724			-	-								3.97e-43	237.92	1447200000	1	201.33	0.51097	0.0371413	0.192721	-1.0051	-0.014292	5	0.0374333	0.193477	-1.11625	-0.121553	5	0.04747	0.217876	-0.914164	0.205973	5	0.0451113	0.212394	-0.8857	0.206253	5	-0.445006	-0.426612	-0.470876
0.179218	0.365108	-0.781437	1.8806	NaN	NaN	-0.54222	-0.650428	-0.943985	-0.156678			-	-		+	-					0.00268609	80.377	193940000	1	72.492	-0.14355	0.0371413	0.192721	-1.03762	-0.0468154	5	0.0374333	0.193477	-1.14778	-0.15308	5	0.04747	0.217876	-1.50405	-0.383916	5	0.0451113	0.212394	-0.702655	0.389298	5	-0.522423	-0.624447	-0.405712
0.17795	0.662762	0.195265	1.7531	NaN	NaN	-0.882822	-0.98604	-0.349333	-0.500183			-	-								2.31e-49	233.84	2655800000	1	149.97	0.90146	0.0371413	0.192721	-1.37823	-0.387418	5	0.0374333	0.193477	-1.48339	-0.488692	5	0.04747	0.217876	-0.909401	0.210736	5	0.0451113	0.212394	-1.04616	0.0457934	5	-0.899739	-0.917814	-0.730252
0.17625	1.15477	-0.0866567	0.322149	NaN	NaN	-1.24608	-1.34365	-1.48694	-1.36083			-	-			-	-				2.48e-15	190.57	749860000	1	60.167	0.11449	0.0371413	0.192721	-1.74149	-0.75068	5	0.0374333	0.193477	-1.841	-0.846305	5	0.04747	0.217876	-2.04701	-0.926876	5	0.0451113	0.212394	-1.90681	-0.814857	5	-1.39368	-1.38364	-0.979737
0.175557	0.867504	0.196368	1.54187	NaN	NaN	-0.547409	-0.652117	-0.415286	-0.56677			-	-				-				1.77e-107	288	1309000000	1	235.38	0.25672	0.0371413	0.192721	-1.04281	-0.0520048	5	0.0374333	0.193477	-1.14947	-0.154769	5	0.04747	0.217876	-0.975355	0.144782	5	0.0451113	0.212394	-1.11275	-0.0207935	5	-0.528569	-0.545592	-0.516036
0.175432	0.45952	-0.373029	0.891724	NaN	NaN	-0.727811	-0.586882	-1.23003	-0.908467			-				-	-				1.01e-09	149.82	101160000	1	149.82	0.07327	0.0371413	0.192721	-1.22322	-0.232407	5	0.0599862	0.244921	-1.36633	0.192566	3	0.04747	0.217876	-1.7901	-0.669962	5	0.0730557	0.270288	-1.76865	-0.0482898	3	-0.585125	-0.591071	-0.573134
0.17416	0.310761	-0.134138	0.666385	NaN	NaN	-1.10157	-1.19879	-1.37368	-1.20286			-	-			-	-				4.17e-63	262.19	484300000	1	224.86	-0.70438	0.0371413	0.192721	-1.59698	-0.606169	5	0.0374333	0.193477	-1.69614	-0.701441	5	0.04747	0.217876	-1.93374	-0.813608	5	0.0451113	0.212394	-1.74884	-0.656888	5	-1.06626	-0.479255	-0.961817
0.173903	0.41171	0.0322257	0.113049	NaN	NaN	-0.73911	-0.840125	-1.74139	-1.72739			-	-			-	-				4.52e-15	148.74	726590000	1	135.86	-2.3878	0.0371413	0.192721	-1.23451	-0.243706	5	0.0374333	0.193477	-1.33747	-0.342777	5	0.04747	0.217876	-2.30146	-1.18133	5	0.0451113	0.212394	-2.27336	-1.18141	5	-0.662866	-0.597147	-0.607348
0.170957	0.593838	0.254279	1.32728	NaN	NaN	-0.706016	-0.80463	0.278236	0.0669238			-	-								6.29e-106	281.14	2353300000	1	93.267	0.21427	0.0371413	0.192721	-1.20142	-0.210612	5	0.0374333	0.193477	-1.30198	-0.307282	5	0.04747	0.217876	-0.281833	0.838304	5	0.0451113	0.212394	-0.479053	0.6129	5	-0.248125	-0.877468	-0.622569
0.170579	0.508762	-0.554825	1.72202	NaN	NaN	-1.04102	-1.13555	-1.81656	-1.24047			-	-			-	-				1.12e-34	209.25	3223900000	1	172.09	0.39132	0.0371413	0.192721	-1.53643	-0.545619	5	0.0374333	0.193477	-1.63289	-0.638199	5	0.04747	0.217876	-2.37663	-1.25649	5	0.0451113	0.212394	-1.78645	-0.694498	5	-1.231	-0.885935	-0.667726
0.170091	0.765821	-0.0952365	0.321393	NaN	NaN	-1.18585	-1.2783	-1.47849	-1.34423			-	-			-	-				0.000259534	115.71	577900000	1	70.908	0.53467	0.0371413	0.192721	-1.68126	-0.690448	5	0.0374333	0.193477	-1.77565	-0.780954	5	0.04747	0.217876	-2.03856	-0.918425	5	0.0451113	0.212394	-1.89021	-0.798252	5	-1.24696	-1.25868	-1.10299
0.16653	0.580452	0.392785	0.898091	NaN	NaN	-0.879714	-0.978676	-0.837864	-1.17431			-	-			-	-				5.27e-11	114.96	190880000	1	114.96	-1.5964	0.0458584	0.214146	-1.47428	-0.285151	4	0.0374333	0.193477	-1.47602	-0.481328	5	0.0587819	0.24245	-1.51101	-0.164716	4	0.0451113	0.212394	-1.72029	-0.628336	5	-0.900258	-0.772901	-0.789105
0.166128	0.867905	0.178699	1.23987	NaN	NaN	-0.502636	-0.598978	-0.0945706	-0.231199			-	-								1.82e-22	200.05	20159000000	1	193.11	0.0049551	0.0371413	0.192721	-0.998041	-0.00723202	5	0.0374333	0.193477	-1.09633	-0.10163	5	0.04747	0.217876	-0.654639	0.465498	5	0.0451113	0.212394	-0.777176	0.314777	5	-0.337942	-0.626273	-0.395217
0.165793	0.567175	0.169509	0.622499	NaN	NaN	-0.532694	-0.628386	-0.485044	-0.610388			-	-				-				1.91e-77	273.77	1461700000	1	243.99	0.39943	0.0371413	0.192721	-1.0281	-0.0372899	5	0.0374333	0.193477	-1.12573	-0.131038	5	0.04747	0.217876	-1.04511	0.0750246	5	0.0451113	0.212394	-1.15636	-0.0644116	5	-0.484611	-0.296107	-0.655198
0.165775	0.878073	0.302951	2.11278	NaN	NaN	-0.586672	-0.681744	-0.301388	-0.555562			-	-				-				2.08e-12	138.96	694520000	1	78.113	2.2274	0.0371413	0.192721	-1.08208	-0.0912673	5	0.0374333	0.193477	-1.17909	-0.184396	5	0.04747	0.217876	-0.861457	0.25868	5	0.0451113	0.212394	-1.10154	-0.00958506	5	-0.641761	-0.542891	-0.427942
0.163951	0.366784	0.188819	0.529514	NaN	NaN	-0.977428	-1.06643	-1.14473	-1.28434			-	-			-	-				3.7e-65	233.89	5146400000	1	107.06	0.081971	0.0371413	0.192721	-1.47283	-0.482023	5	0.0374333	0.193477	-1.56378	-0.56908	5	0.04747	0.217876	-1.7048	-0.584664	5	0.0451113	0.212394	-1.83031	-0.738362	5	-0.865124	-0.952974	-0.990774
0.160744	0.552288	0.0408709	0.111665	NaN	NaN	-0.613558	-0.7036	-0.134922	-0.13944			-	-								7.64e-29	179.14	1896300000	1	68.41	-0.53258	0.0371413	0.192721	-1.10896	-0.118153	5	0.0374333	0.193477	-1.20095	-0.206252	5	0.04747	0.217876	-0.69499	0.425147	5	0.0451113	0.212394	-0.685416	0.406537	5	-0.699024	-0.888995	-0.273863
0.160038	0.813825	0.257196	2.41696	NaN	NaN	-0.558519	-0.648511	-0.371521	-0.581476			-	-				-				0.00147296	134.26	8804200000	1	96.624	0.27419	0.0371413	0.192721	-1.05392	-0.0631149	5	0.0374333	0.193477	-1.14586	-0.151163	5	0.04747	0.217876	-0.93159	0.188547	5	0.0451113	0.212394	-1.12745	-0.0354998	5	-0.502532	-0.608662	-0.388656
0.156551	0.506332	0.125307	0.382027	NaN	NaN	-1.21912	-1.29846	-1.64094	-1.71662			-	-			-	-				6.65e-10	150.22	3938200000	1	98.942	0.1967	0.0371413	0.192721	-1.71452	-0.723712	5	0.0374333	0.193477	-1.79581	-0.801116	5	0.04747	0.217876	-2.201	-1.08087	5	0.0451113	0.212394	-2.26259	-1.17064	5	-1.30965	-1.0292	-1.20301
0.152524	1.47422	0.0726645	0.603753	NaN	NaN	-0.722704	-0.803801	-0.688905	-0.720302			-	-			-	-				3.91e-98	294.28	37489000000	1	257.99	0.23208	0.0371413	0.192721	-1.21811	-0.2273	5	0.0374333	0.193477	-1.30115	-0.306453	5	0.04747	0.217876	-1.24897	-0.128837	5	0.0451113	0.212394	-1.26628	-0.174326	5	-0.580978	-0.714506	-0.731019
0.151853	0.448122	-0.0643106	0.0768422	NaN	NaN	-0.537419	-0.537924	-0.90354	-0.682155			-				-	-				3.11e-05	133.76	2061100000	1	68.515	0.19956	0.0371413	0.192721	-1.03282	-0.0420151	5	0.0460981	0.214705	-1.13404	0.058192	4	0.04747	0.217876	-1.46361	-0.343472	5	0.0557777	0.236173	-1.33788	-0.0264342	4	-0.285508	-0.622576	-0.226316
0.150082	0.545416	0.109727	0.726279	NaN	NaN	-0.827874	-0.905502	-0.510027	-0.578021			-	-				-				9.25e-97	318.35	37490000000	1	52.853	-0.42764	0.0371413	0.192721	-1.32328	-0.33247	5	0.0374333	0.193477	-1.40285	-0.408154	5	0.04747	0.217876	-1.0701	0.0500413	5	0.0451113	0.212394	-1.124	-0.0320448	5	-0.847927	-0.986366	-0.493284
0.149885	0.120799	0.540195	1.40623	NaN	NaN	-0.507638	-0.588651	-1.32591	-1.8005			-	-			-	-				1.53e-45	244.15	46937000000	1	178.03	0.84547	0.0371413	0.192721	-1.00304	-0.0122336	5	0.0374333	0.193477	-1.086	-0.0913032	5	0.04747	0.217876	-1.88598	-0.765841	5	0.0451113	0.212394	-2.34648	-1.25453	5	-0.467152	-0.952757	-0.512554
0.148292	0.431328	1.02721	1.90803	NaN	NaN	-0.792911	-0.869246	0.64107	-0.311979			-	-	++	+	+					0.000665098	115.7	1547500000	1	56.043	-0.011189	0.0371413	0.192721	-1.28832	-0.297507	5	0.0374333	0.193477	-1.36659	-0.371898	5	0.04747	0.217876	0.0810012	1.20114	5	0.0451113	0.212394	-0.857955	0.233998	5	-0.688319	-0.450987	-1.06157
0.146833	0.067115	0.0287737	0.0135524	NaN	NaN	-1.82866	-1.89208	-1.50298	-1.4872			-	-			-	-				3.54e-67	260.97	1031800000	1	212.94	0.00025166	0.0371413	0.192721	-2.32407	-1.33326	5	0.0374333	0.193477	-2.38942	-1.39473	5	0.04747	0.217876	-2.06305	-0.942916	5	0.0451113	0.212394	-2.03317	-0.941221	5	-1.36994	-1.82606	-1.71786
0.146106	0.457895	0.308347	1.40332	NaN	NaN	-0.656356	-0.635906	-0.708805	-0.853222			-	-			-	-				1.23e-81	290.64	487290000	1	290.64	-0.0082047	0.0371413	0.192721	-1.15176	-0.160952	5	0.0460981	0.214705	-1.23202	-0.0397907	4	0.04747	0.217876	-1.26887	-0.148737	5	0.0557777	0.236173	-1.50894	-0.1975	4	-0.66856	-0.669931	-0.549518
0.143514	0.677946	0.339566	2.0497	NaN	NaN	-1.59134	-1.65428	-1.39064	-1.67289			-	-			-	-				2.6e-78	280.97	770810000	1	266.35	0.7287	0.0371413	0.192721	-2.08674	-1.09593	5	0.0374333	0.193477	-2.15162	-1.15693	5	0.04747	0.217876	-1.95071	-0.830568	5	0.0451113	0.212394	-2.21886	-1.12691	5	-1.48634	-1.72883	-1.60445
0.143253	0.513084	-0.00939996	0.0684246	NaN	NaN	-0.526089	-0.576557	-0.483929	-0.46689			-									3.4e-20	189.56	467350000	1	189.56	-0.4436	0.0371413	0.192721	-1.02149	-0.0306842	5	0.0460981	0.214705	-1.17267	0.0195588	4	0.04747	0.217876	-1.044	0.0761391	5	0.0557776	0.236173	-1.12261	0.188831	4	-0.351029	-0.811957	-0.371357
0.140819	0.507985	0.289262	0.85781	NaN	NaN	-0.544704	-0.61678	-0.47277	-0.712754			-	-				-				7.3e-05	123.11	2032100000	1	118.03	-1.5627	0.0371413	0.192721	-1.04011	-0.0492996	5	0.0374333	0.193477	-1.11413	-0.119432	5	0.04747	0.217876	-1.03284	0.0872989	5	0.0451113	0.212394	-1.25873	-0.166777	5	-0.755643	-0.598804	-0.211477
0.140677	0.324846	0.475893	1.26195	NaN	NaN	-1.87096	-2.04863	-1.75358	-2.04172			-	-			-	-				3.48e-115	310.55	1263900000	1	250.95	-1.3039	0.0371413	0.192721	-2.36637	-1.37556	5	0.0460981	0.214705	-2.64475	-1.45252	4	0.04747	0.217876	-2.31365	-1.19351	5	0.0557776	0.236173	-2.69745	-1.386	4	-1.81421	-2.08792	-1.77298
0.139148	0.954006	-0.117062	0.321273	NaN	NaN	-0.622935	-0.692567	-0.244686	-0.0974166			-	-								2.65e-31	205.09	1071800000	1	61.523	0.79829	0.0371413	0.192721	-1.11834	-0.127531	5	0.0374333	0.193477	-1.18992	-0.195219	5	0.04747	0.217876	-0.804755	0.315382	5	0.0451113	0.212394	-0.643393	0.44856	5	-0.619312	-0.607118	-0.415168
0.139078	0.24949	0.261239	1.43059	NaN	NaN	-0.52833	-0.598952	0.256079	0.0382513			-	-								1.11e-139	332.24	6056900000	1	249.26	0.33374	0.0371413	0.192721	-1.02373	-0.0329254	5	0.0374333	0.193477	-1.0963	-0.101604	5	0.04747	0.217876	-0.303989	0.816148	5	0.0451113	0.212394	-0.507725	0.584228	5	-1.108	-0.404802	-0.258187
0.138913	0.328778	-0.216411	0.954129	NaN	NaN	-1.01921	-1.0842	-0.528596	-0.284472			-	-								6.68e-08	122.39	113820000	1	116.71	-0.59978	0.0371413	0.192721	-1.51462	-0.523806	5	0.0374333	0.193477	-1.58155	-0.586856	5	0.04747	0.217876	-1.08866	0.0314724	5	0.0451113	0.212394	-0.830449	0.261504	5	-0.983766	-1.03068	-0.706499
0.138042	0.325341	0.361364	1.06753	NaN	NaN	-0.946574	-0.722269	-1.1874	-1.31721			-				-					5.2e-13	157.91	36108000	1	157.91	-0.67415	0.0458584	0.214146	-1.54114	-0.35201	4	0.150995	0.388581	-5.65966	4.21513	1	0.058782	0.24245	-1.86055	-0.514249	4	0.192129	0.438326	-6.88666	4.25224	1	-0.643697	NaN	-0.911715
0.13711	0.397577	0.002511	0.00262093	NaN	NaN	-0.555024	-0.623498	-0.835251	-0.798601			-	-			-	-				1.11e-22	216.43	28365000000	1	61.56	-0.011834	0.0371413	0.192721	-1.05043	-0.0596201	5	0.0374333	0.193477	-1.12085	-0.12615	5	0.04747	0.217876	-1.39532	-0.275182	5	0.0451113	0.212394	-1.34458	-0.252625	5	-0.522089	-0.798036	-0.248145
0.136854	0.510605	0.223847	0.666999	NaN	NaN	-0.56838	-0.636464	-0.165232	-0.344599			-	-								6.46e-05	150.4	5045800000	1	74.267	-0.86205	0.0371413	0.192721	-1.06378	-0.0729757	5	0.0374333	0.193477	-1.13381	-0.139116	5	0.04747	0.217876	-0.7253	0.394837	5	0.0451113	0.212394	-0.890576	0.201377	5	-0.392509	-0.459119	-0.42302
0.136566	0.637464	-0.202525	0.480036	NaN	NaN	-1.55368	-1.61051	-1.83819	-1.59899			-	-			-	-				1.63e-13	167.2	556240000	1	117.09	-0.19814	0.0371413	0.192721	-2.04908	-1.05827	5	0.0374333	0.193477	-2.10785	-1.11316	5	0.04747	0.217876	-2.39826	-1.27812	5	0.0451113	0.212394	-2.14497	-1.05302	5	-1.58978	-1.50357	-1.2663
0.135614	0.932234	0.138352	1.28279	NaN	NaN	-0.683802	-0.749433	-0.383721	-0.479905			-	-								1.43e-30	218.55	54881000000	1	156.14	-1.1452	0.0371413	0.192721	-1.17921	-0.188398	5	0.0374333	0.193477	-1.24678	-0.252085	5	0.04747	0.217876	-0.943789	0.176348	5	0.0451113	0.212394	-1.02588	0.0660711	5	-0.496003	-0.787998	-0.548392
0.135412	0.682461	0.107683	0.112115	NaN	NaN	-0.839395	-0.929767	-0.479627	-0.541932			-	-								1.47e-07	131.06	175750000	1	113.99	0.035333	0.0599259	0.244798	-1.61845	-0.06034	3	0.0374333	0.193477	-1.42712	-0.432419	5	0.0771789	0.277811	-1.36374	0.404491	3	0.0451113	0.212394	-1.08791	0.00404485	5	-0.691492	-0.98423	NaN
0.134712	1.08776	0.0488486	0.101973	NaN	NaN	-0.553503	-0.619739	-1.30023	-1.30494			-	-			-	-				0	455.29	1422600000	1	338.41	1.4185	0.0371413	0.192721	-1.04891	-0.0580983	5	0.0374333	0.193477	-1.11709	-0.122391	5	0.04747	0.217876	-1.8603	-0.740164	5	0.0451113	0.212394	-1.85092	-0.758967	5	-0.550943	-0.535432	-0.282597
0.134617	1.2078	0.0650795	1.18757	NaN	NaN	-0.705235	-0.769689	-0.926885	-0.949507			-	-			-	-				2.11e-05	133.13	752750000	1	132.84	0.046565	0.0371413	0.192721	-1.20064	-0.209831	5	0.0374333	0.193477	-1.26704	-0.272341	5	0.04747	0.217876	-1.48695	-0.366817	5	0.0451113	0.212394	-1.49548	-0.403531	5	-0.651989	-0.62027	-0.604766
0.133539	0.130109	0.437061	0.567255	NaN	NaN	-0.496014	-0.41825	-0.42603	-0.492689			-									6.45e-05	113.93	901520000	1	57.348	3.0892	0.0371413	0.192721	-0.991418	-0.000609774	5	0.0460982	0.214705	-1.01437	0.177867	4	0.04747	0.217876	-0.986098	0.134039	5	0.0557778	0.236173	-1.14841	0.163033	4	0.0669747	-0.704279	-1.305
0.133062	0.486755	0.245612	1.21483	NaN	NaN	-0.591509	-0.65577	-0.508497	-0.706496			-	-				-				5.58e-63	257.12	1021400000	1	159.13	-1.2108	0.0371413	0.192721	-1.08691	-0.0961047	5	0.0374333	0.193477	-1.15312	-0.158422	5	0.04747	0.217876	-1.06857	0.0515711	5	0.0451113	0.212394	-1.25247	-0.160519	5	-0.482109	-0.565579	-0.762521
0.132444	0.376449	-0.00444203	0.0167336	NaN	NaN	-1.11731	-1.17513	-0.648017	-0.605911			-	-			-	-				6.83e-10	163.09	11139000000	1	138.42	-0.076365	0.0371413	0.192721	-1.61272	-0.621908	5	0.0374333	0.193477	-1.67248	-0.677781	5	0.04747	0.217876	-1.20809	-0.0879482	5	0.0451113	0.212394	-1.15189	-0.0599342	5	-0.881126	-1.12032	-0.892592
0.132202	0.135848	-0.0577131	0.172503	NaN	NaN	-0.572286	-0.635952	-0.242484	-0.152005			-	-								0.00273027	96.143	590060000	1	96.143	0.27775	0.0371413	0.192721	-1.06769	-0.0768815	5	0.0374333	0.193477	-1.1333	-0.138604	5	0.04747	0.217876	-0.802553	0.317584	5	0.0451113	0.212394	-0.697982	0.393971	5	-0.223026	0.423804	-1.16673
0.131662	0.338123	0.114807	0.283138	NaN	NaN	-0.639447	-0.701856	-1.76499	-1.82984			-	-			-	-				6.68e-09	134.21	7648100000	1	68.283	-0.10123	0.0371413	0.192721	-1.13485	-0.144042	5	0.0374333	0.193477	-1.1992	-0.204508	5	0.04747	0.217876	-2.32506	-1.20492	5	0.0451113	0.212394	-2.37581	-1.28386	5	-0.81311	-0.641819	-0.759196
0.128823	0.233272	0.154256	0.251438	NaN	NaN	-0.499104	-0.56041	-1.32389	-1.42928			-	-			-	-				6.59e-189	358.2	6870600000	1	315.1	1.6271	0.0371413	0.192721	-0.994509	-0.0036999	5	0.0374333	0.193477	-1.05776	-0.0630616	5	0.04747	0.217876	-1.88395	-0.763817	5	0.0451113	0.212394	-1.97526	-0.883307	5	-0.466512	-0.669264	-0.655575
0.128432	0.463316	0.373471	1.47975	NaN	NaN	-0.622375	-0.685315	-0.536644	-0.857754			-	-				-				4.6e-05	150.66	636470000	1	108.4	0.047804	0.0458584	0.214146	-1.21694	-0.0278117	4	0.0374333	0.193477	-1.18266	-0.187967	5	0.058782	0.24245	-1.20979	0.136505	4	0.0451113	0.212394	-1.40373	-0.311777	5	-0.499914	-0.623474	-0.633024
0.127552	0.514683	0.153649	1.03492	NaN	NaN	-0.70412	-0.761944	-0.706199	-0.814959			-	-			-	-				1.12e-78	268.08	1705100000	1	162.26	0.28606	0.0371413	0.192721	-1.19952	-0.208715	5	0.0374333	0.193477	-1.25929	-0.264596	5	0.04747	0.217876	-1.26627	-0.14613	5	0.0451113	0.212394	-1.36094	-0.268982	5	-0.511172	-0.703954	-0.829784
0.127034	1.4093	-0.119269	1.15492	NaN	NaN	-0.563345	-0.622252	-1.94041	-1.78021			-	-			-	-				6.38e-07	143.24	2971400000	1	143.24	-0.077567	0.0371413	0.192721	-1.05875	-0.0679402	5	0.0374333	0.193477	-1.1196	-0.124904	5	0.04747	0.217876	-2.50048	-1.38034	5	0.0451113	0.212394	-2.32618	-1.23423	5	-0.492019	-0.478462	-0.536531
0.1267	0.347072	-0.0264801	0.0983037	NaN	NaN	-1.1081	-1.16062	-0.105827	-0.0460992			-	-								5.02e-193	391.93	2921700000	1	357.39	0.081934	0.0371413	0.192721	-1.60351	-0.6127	5	0.0374333	0.193477	-1.65797	-0.663275	5	0.04747	0.217876	-0.665895	0.454241	5	0.0451113	0.212394	-0.592076	0.499877	5	-1.21239	-0.931067	-0.849908
0.126232	0.35629	0.215492	1.45488	NaN	NaN	-0.550044	-0.608345	0.201582	0.027866			-	-								1.08e-131	337.64	5316200000	1	287.38	-0.15654	0.0371413	0.192721	-1.04545	-0.0546397	5	0.0374333	0.193477	-1.10569	-0.110997	5	0.04747	0.217876	-0.358486	0.761651	5	0.0451113	0.212394	-0.518111	0.573843	5	-0.921261	-0.150854	-0.463666
0.126126	0.253164	-0.0848444	0.0757071	NaN	NaN	-0.520298	-0.379446	-0.654581	-0.124334			-				-					6.23e-20	170.23	208040000	1	60.941	0.23886	0.0371413	0.192721	-1.0157	-0.0248934	5	0.085858	0.293015	-1.64019	0.881298	2	0.04747	0.217876	-1.21465	-0.0945121	5	0.105853	0.325351	-1.52421	1.27554	2	0.0605876	-0.887835	-0.217195
0.12192	0.10335	0.0486961	0.0237608	NaN	NaN	-1.90927	-1.94836	-3.19058	-3.18308			-	-			-	-				2.99e-61	278.01	28702000000	1	257.19	-0.89191	0.0371413	0.192721	-2.40468	-1.41387	5	0.0374333	0.193477	-2.44571	-1.45101	5	0.04747	0.217876	-3.75064	-2.63051	5	0.0451113	0.212394	-3.72905	-2.6371	5	-2.08133	-2.10482	-2.18279
0.120978	0.89127	0.267561	2.1055	NaN	NaN	-0.763259	-0.814242	-0.80868	-1.02576			-	-			-	-				0.000141477	94.82	432030000	1	54.471	0.067429	0.0371413	0.192721	-1.25866	-0.267854	5	0.0374333	0.193477	-1.31159	-0.316894	5	0.04747	0.217876	-1.36875	-0.248611	5	0.0451113	0.212394	-1.57174	-0.479782	5	-0.786826	-0.595922	-0.713235
0.120915	0.479239	0.447726	4.36552	NaN	NaN	-1.19963	-1.24569	-1.19619	-1.58315			-	-		+	-	-				8.19e-207	383.79	4430900000	1	370.05	-0.68231	0.0371413	0.192721	-1.69504	-0.704226	5	0.0374333	0.193477	-1.74304	-0.748341	5	0.04747	0.217876	-1.75626	-0.636125	5	0.0451113	0.212394	-2.12913	-1.03718	5	-1.23221	-1.35849	-0.877625
0.119268	0.394874	-0.248082	1.04992	NaN	NaN	-0.659672	-0.710203	-1.34275	-1.06313			-	-			-	-				7.02e-93	284.76	12261000000	1	223.67	-0.37164	0.0371413	0.192721	-1.15508	-0.164268	5	0.0374333	0.193477	-1.20755	-0.212855	5	0.04747	0.217876	-1.90282	-0.782679	5	0.0451113	0.212394	-1.60911	-0.517153	5	-0.532125	-0.506912	-0.471152
0.118016	0.433552	0.576911	2.18768	NaN	NaN	-0.872529	-0.91951	-0.14638	-0.663626			-	-	+	+		-				4.07e-46	234.52	583790000	1	234.52	-0.035795	0.0371413	0.192721	-1.36793	-0.377125	5	0.0374333	0.193477	-1.41686	-0.422162	5	0.04747	0.217876	-0.706448	0.413689	5	0.0451113	0.212394	-1.2096	-0.117649	5	-0.864952	-0.645678	-0.84098
0.114985	0.185127	0.0642239	0.0807861	NaN	NaN	-1.01964	-1.25123	-0.675882	-0.921917			-	-				-				2.86e-102	297.99	206920000	1	269.25	0.50668	0.0599259	0.244798	-1.7987	-0.240585	3	0.0599861	0.244921	-2.03068	-0.471788	3	0.0771789	0.277811	-1.56	0.208236	3	0.0730556	0.270288	-1.78209	-0.0617399	3	NaN	-1.42215	-0.903668
0.114271	0.522862	-0.017467	0.0561194	NaN	NaN	-0.559774	-0.606721	-0.344103	-0.291477			-	-								2.77e-11	147.71	603980000	1	93.772	0.072662	0.0371413	0.192721	-1.05518	-0.0643697	5	0.0374333	0.193477	-1.10407	-0.109373	5	0.04747	0.217876	-0.904171	0.215966	5	0.0451113	0.212394	-0.837453	0.2545	5	-0.469881	-0.746893	-0.431557
0.113827	0.412828	-0.610333	2.25684	NaN	NaN	-0.716486	-0.761268	-1.29142	-0.665584			-	-		+	-	-				2.69e-38	218.58	4606900000	1	49.512	3.2004	0.0371413	0.192721	-1.21189	-0.221082	5	0.0374333	0.193477	-1.25862	-0.26392	5	0.04747	0.217876	-1.85149	-0.731353	5	0.0451113	0.212394	-1.21156	-0.119608	5	-0.589297	-0.738107	-0.665544
0.113069	0.463568	0.0563493	0.390565	NaN	NaN	-0.771854	-0.857299	-1.74469	-1.7309			-	-			-	-				0	466.04	10328000000	1	292.6	0.7859	0.0371413	0.192721	-1.26726	-0.276449	5	0.0460981	0.214705	-1.45341	-0.261183	4	0.04747	0.217876	-2.30476	-1.18463	5	0.0557776	0.236173	-2.38662	-1.07518	4	-0.819277	-0.912191	-0.607199
0.109705	0.650879	-0.118868	0.566141	NaN	NaN	-1.57618	-1.6075	-2.59622	-2.43221			-	-			-	-				4.18e-39	226.88	1137800000	1	226.88	0.26128	0.0371413	0.192721	-2.07158	-1.08077	5	0.0374333	0.193477	-2.10484	-1.11015	5	0.04747	0.217876	-3.15629	-2.03615	5	0.0451113	0.212394	-2.97819	-1.88623	5	-1.5537	-1.63721	-1.6575
0.105291	0.319409	0.12849	0.380591	NaN	NaN	-1.12999	-1.1655	-0.616263	-0.653574			-	-			-					2.57e-06	131.41	2674800000	1	116.25	0.020866	0.0371413	0.192721	-1.62539	-0.634586	5	0.0460981	0.214705	-1.76161	-0.569381	4	0.04747	0.217876	-1.17633	-0.0561945	5	0.0557776	0.236173	-1.3093	0.00214726	4	-0.910753	-1.3229	-0.847108
0.10378	0.210189	-0.0274344	0.111973	NaN	NaN	-1.25934	-1.28862	-1.92618	-1.85392			-	-			-	-				1.67e-11	168.74	232730000	1	165.15	-0.38075	0.0371413	0.192721	-1.75474	-0.763936	5	0.0374333	0.193477	-1.78597	-0.791273	5	0.04747	0.217876	-2.48625	-1.36611	5	0.0451113	0.212394	-2.3999	-1.30794	5	-0.856013	-1.20453	-0.94896
0.103362	0.509816	-0.108279	0.864859	NaN	NaN	-1.72303	-1.74675	-2.21204	-2.06062			-	-			-	-				1.16e-74	296.32	3228700000	1	93.598	-0.22623	0.0371413	0.192721	-2.21844	-1.22763	5	0.0374333	0.193477	-2.2441	-1.2494	5	0.04747	0.217876	-2.77211	-1.65198	5	0.0451113	0.212394	-2.6066	-1.51464	5	-1.62539	-1.60881	-1.63892
0.103305	0.207876	0.0451991	0.0682434	NaN	NaN	-1.64302	-1.66757	-2.17875	-2.17436			-	-			-	-				0.000819381	106.42	273970000	1	99.139	-0.21611	0.0371413	0.192721	-2.13842	-1.14761	5	0.0374333	0.193477	-2.16492	-1.17022	5	0.04747	0.217876	-2.73881	-1.61868	5	0.0451113	0.212394	-2.72033	-1.62838	5	-1.7585	-1.69865	-1.87678
0.0999055	0.1272	-0.190208	0.719945	NaN	NaN	-1.01551	-1.04387	-0.672931	-0.452954			-	-			-					3.67e-112	306.05	3359700000	1	174.39	0.60179	0.0371413	0.192721	-1.51091	-0.520106	5	0.0374333	0.193477	-1.54122	-0.54652	5	0.04747	0.217876	-1.233	-0.112862	5	0.0451113	0.212394	-0.99893	0.093023	5	-0.820998	-1.10562	-0.193929
0.0995305	1.23992	0.0996619	0.99604	NaN	NaN	-0.597699	-0.630363	-0.653058	-0.710511			-	-			-	-				0	519.24	3079800000	1	181.86	0.24378	0.0371413	0.192721	-1.0931	-0.102295	5	0.0374333	0.193477	-1.12771	-0.133015	5	0.04747	0.217876	-1.21313	-0.0929895	5	0.0451113	0.212394	-1.25649	-0.164534	5	-0.46373	-0.641722	-0.46874
0.0994036	0.145463	1.15851	0.588193	NaN	NaN	-0.958087	-0.994069	0.096452	-0.973855			-	-				-				8.7e-17	180.61	306020000	1	180.61	-0.60682	0.0458584	0.214146	-1.55265	-0.363523	4	0.0374333	0.193477	-1.49142	-0.496721	5	0.058782	0.24245	-0.576697	0.769601	4	0.0451113	0.212394	-1.51983	-0.427878	5	-0.806954	-1.28281	-0.617238
0.0983373	0.236835	-0.0819572	0.361309	NaN	NaN	-1.12344	-1.14912	-1.33762	-1.21695			-	-			-	-				1.74e-07	161.17	2940600000	1	84.687	-0.17433	0.0371413	0.192721	-1.61885	-0.62804	5	0.0374333	0.193477	-1.64647	-0.651776	5	0.04747	0.217876	-1.89769	-0.777548	5	0.0451113	0.212394	-1.76293	-0.670978	5	-1.20811	-1.21392	-1.16045
0.0982631	0.593571	0.0616822	0.182584	NaN	NaN	-0.594295	-0.625805	-0.928914	-0.948273			-	-			-	-				6.08e-18	189.56	1021700000	1	189.56	-0.12543	0.0371413	0.192721	-1.0897	-0.0988905	5	0.0374333	0.193477	-1.12315	-0.128457	5	0.04747	0.217876	-1.48898	-0.368846	5	0.0451113	0.212394	-1.49425	-0.402297	5	-0.562887	-0.716943	-0.530984
0.0977607	0.160907	-0.180146	0.413394	NaN	NaN	-1.29958	-1.18288	-1.59805	-1.24912			-	-			-	-				4.8e-27	194.51	532600000	1	177.67	-0.25386	0.0371413	0.192721	-1.79498	-0.804173	5	0.0460981	0.214705	-1.779	-0.586765	4	0.04747	0.217876	-2.15812	-1.03798	5	0.0557776	0.236173	-1.90484	-0.593399	4	-1.00114	-1.28688	-1.1118
0.0975844	0.481125	0.219961	1.37256	NaN	NaN	-0.521643	-0.553325	-1.06965	-1.23952			-	-			-	-				2.14e-23	201.09	3371100000	1	181.4	0.13086	0.0371413	0.192721	-1.01705	-0.0262386	5	0.0374333	0.193477	-1.05067	-0.0559773	5	0.04747	0.217876	-1.62972	-0.509578	5	0.0451113	0.212394	-1.7855	-0.693548	5	-0.355729	-0.664676	-0.391517
0.0968273	0.441	-0.376971	2.21078	NaN	NaN	-0.890188	-0.917049	-1.12852	-0.726971			-	-			-	-				2.93e-10	151.26	751730000	1	94.122	-0.57439	0.0371413	0.192721	-1.38559	-0.394784	5	0.0374333	0.193477	-1.4144	-0.419701	5	0.04747	0.217876	-1.68859	-0.568454	5	0.0451113	0.212394	-1.27295	-0.180994	5	-0.671179	-0.807524	-0.798078
0.0936453	0.189401	-0.826396	0.791401	NaN	NaN	-1.26989	-1.28952	-1.75448	-0.918988			-	-			-	-				2.51e-05	148.14	8207200000	1	148.14	-0.34125	0.0371413	0.192721	-1.76529	-0.774485	5	0.0374333	0.193477	-1.78687	-0.792177	5	0.04747	0.217876	-2.31455	-1.19441	5	0.0451113	0.212394	-1.46496	-0.373012	5	-1.07195	-1.0497	-1.30809
0.092427	0.194416	0.162685	0.497966	NaN	NaN	-0.63179	-0.657395	-1.04667	-1.1619			-	-			-	-				9.87e-41	198.02	860170000	1	198.02	-1.1784	0.0371413	0.192721	-1.12719	-0.136386	5	0.0374333	0.193477	-1.15474	-0.160047	5	0.04747	0.217876	-1.60674	-0.486605	5	0.0451113	0.212394	-1.70788	-0.615927	5	-0.694506	-0.667878	-0.306063
0.0918746	0.208773	0.497799	0.466832	NaN	NaN	-0.838851	-0.861628	-1.82493	-2.25578			-	-			-	-				5.73e-257	411.88	1118200000	1	411.88	0.13999	0.0371413	0.192721	-1.33426	-0.343447	5	0.0374333	0.193477	-1.35898	-0.36428	5	0.04747	0.217876	-2.38499	-1.26486	5	0.0451113	0.212394	-2.80175	-1.7098	5	-0.861067	-0.953059	-0.851031
0.0913364	0.289833	0.346334	1.14827	NaN	NaN	-1.31829	-1.33521	-1.22809	-1.51785			-	-			-	-				6.1e-76	282.73	1455000000	1	272.96	-0.19167	0.0371413	0.192721	-1.81369	-0.822883	5	0.0374333	0.193477	-1.83256	-0.837864	5	0.04747	0.217876	-1.78816	-0.668019	5	0.0451113	0.212394	-2.06382	-0.971871	5	-0.982655	-1.57318	-1.26048
0.0907416	0.28847	0.0637504	0.230633	NaN	NaN	-0.587032	-0.611551	-0.55534	-0.579062			-	-				-				1.99e-28	208.82	446330000	1	202.34	0.59853	0.0371413	0.192721	-1.08244	-0.0916276	5	0.0374333	0.193477	-1.1089	-0.114203	5	0.04747	0.217876	-1.11541	0.00472819	5	0.0451113	0.212394	-1.12504	-0.0330856	5	-0.408524	-0.514632	-0.528085
0.0896639	0.260726	0.0444358	0.0627778	NaN	NaN	-1.13554	-1.17248	-2.87114	-2.89808			-	-			-	-				6.28e-23	164.35	1026300000	1	112.57	-1.2015	0.0458584	0.214146	-1.7301	-0.540975	4	0.0374333	0.193477	-1.66983	-0.675136	5	0.058782	0.24245	-3.54429	-2.19799	4	0.0451113	0.212394	-3.44406	-2.35211	5	NaN	-1.3068	-1.16799
0.0868818	0.22935	0.148371	0.670294	NaN	NaN	-0.676533	-0.696425	-0.560035	-0.664679			-	-				-				5.55e-29	175.57	2400800000	1	153.1	-0.05973	0.0371413	0.192721	-1.17194	-0.181128	5	0.0374333	0.193477	-1.19377	-0.199077	5	0.04747	0.217876	-1.1201	3.38e-05	5	0.0451113	0.212394	-1.21066	-0.118702	5	-0.482024	-0.662052	-0.393815
0.0853642	0.398121	0.152115	1.10115	NaN	NaN	-0.868666	-0.884988	-0.283641	-0.39363			-	-								2.67e-75	274.45	1135000000	1	274.45	0.37983	0.0371413	0.192721	-1.36407	-0.373261	5	0.0374333	0.193477	-1.38234	-0.387641	5	0.04747	0.217876	-0.843709	0.276428	5	0.0451113	0.212394	-0.939607	0.152346	5	-0.633912	-1.00722	-0.863854
0.0849644	0.332485	0.193038	0.376954	NaN	NaN	-0.818764	-0.835268	-1.34389	-1.48626			-	-			-	-				1.28e-195	354.2	351780000	1	354.2	-1.1229	0.0371413	0.192721	-1.31417	-0.32336	5	0.0374333	0.193477	-1.33262	-0.33792	5	0.04747	0.217876	-1.90396	-0.783819	5	0.0451113	0.212394	-2.03224	-0.940283	5	-0.64786	-1.10791	-0.802145
0.0844804	0.348203	-0.179127	1.60347	NaN	NaN	-1.62213	-1.62922	-2.172	-1.95305			-	-			-	-				3.84e-19	196.38	35042000000	1	141.82	0.063325	0.0371413	0.192721	-2.11754	-1.12673	5	0.0374333	0.193477	-2.12657	-1.13187	5	0.04747	0.217876	-2.73206	-1.61193	5	0.0451113	0.212394	-2.49903	-1.40707	5	-1.41477	-1.70086	-1.57379
0.0842802	0.513049	0.288367	1.52085	NaN	NaN	-1.55651	-1.56414	-1.95882	-2.18846			-	-			-	-				1.64e-170	367.05	863450000	1	115.11	2.2861	0.0371413	0.192721	-2.05191	-1.0611	5	0.0374333	0.193477	-2.06149	-1.06679	5	0.04747	0.217876	-2.51889	-1.39875	5	0.0451113	0.212394	-2.73444	-1.64249	5	-1.433	-1.55485	-1.54127
0.0838953	0.313551	-0.105663	1.06552	NaN	NaN	-2.74854	-2.74252	-3.19715	-3.04194			-	-			-	-				1.85e-112	308.2	32622000000	1	222.64	-0.4694	0.0371413	0.192721	-3.24394	-2.25313	5	0.0374333	0.193477	-3.23987	-2.24517	5	0.04747	0.217876	-3.75722	-2.63708	5	0.0451113	0.212394	-3.58791	-2.49596	5	-2.7345	-2.89345	-2.74791
0.083887	0.120872	-0.564695	2.657	NaN	NaN	-0.526446	-0.438713	-0.613044	-0.0668637			-			+	-					6.57e-23	194.06	1245200000	1	194.06	0.37257	0.0371413	0.192721	-1.02185	-0.0310417	5	0.0599864	0.244921	-1.21816	0.340736	3	0.04747	0.217876	-1.17311	-0.052976	5	0.0730559	0.270288	-0.927042	0.793315	3	-0.791918	-0.116696	-0.340772
0.0838165	0.21995	-0.115664	0.175812	NaN	NaN	-0.800413	-0.821525	-0.50484	-0.357247			-	-								4.89e-46	232.17	211560000	1	124.62	-1.3644	0.0458584	0.214146	-1.39498	-0.205849	4	0.0374333	0.193477	-1.31887	-0.324177	5	0.04747	0.217876	-1.06491	0.0552283	5	0.0451113	0.212394	-0.903224	0.188729	5	-0.953931	-0.586232	-0.713753
0.0829325	0.359687	0.171142	0.845584	NaN	NaN	-0.552246	-0.569811	-0.666706	-0.792453			-	-			-	-				4.88e-26	191.52	1977300000	1	191.52	0.75406	0.0371413	0.192721	-1.04765	-0.0568421	5	0.0374333	0.193477	-1.06716	-0.0724633	5	0.04747	0.217876	-1.22677	-0.106638	5	0.0451113	0.212394	-1.33843	-0.246477	5	-0.454149	-0.618675	-0.425391
0.0826799	0.278367	-0.0298954	0.105393	NaN	NaN	-0.70289	-0.718537	-0.308716	-0.244426			-	-								2.27e-09	176.44	4963800000	1	169.09	0.23759	0.0371413	0.192721	-1.19829	-0.207485	5	0.0374333	0.193477	-1.21589	-0.221189	5	0.04747	0.217876	-0.868785	0.251352	5	0.0451113	0.212394	-0.790403	0.30155	5	-0.602905	-0.613533	-0.833689
0.0824201	1.00997	0.143181	2.25152	NaN	NaN	-0.80485	-0.819116	-0.585254	-0.684772			-	-			-	-				3.73e-14	188.6	45337000000	1	148.71	0.1774	0.0371413	0.192721	-1.30025	-0.309446	5	0.0374333	0.193477	-1.31646	-0.321768	5	0.04747	0.217876	-1.14532	-0.0251852	5	0.0451113	0.212394	-1.23075	-0.138795	5	-0.795265	-0.810192	-0.676628
0.082281	0.164046	0.72751	1.52986	NaN	NaN	-0.913364	-0.92629	-0.394624	-1.05436			-	-				-				9.69e-15	170.56	1003800000	1	158.86	-0.29572	0.0371413	0.192721	-1.40877	-0.41796	5	0.0374333	0.193477	-1.42364	-0.428942	5	0.04747	0.217876	-0.954692	0.165445	5	0.0451113	0.212394	-1.60033	-0.508379	5	-0.746102	-1.10728	-0.602942
0.0815586	0.223399	-0.0316972	0.0453033	NaN	NaN	-0.58382	-0.464759	-1.45387	-1.15966			-				-	-				3.09e-21	184.98	132810000	1	173.72	-0.15807	0.0371413	0.192721	-1.07922	-0.0884152	5	0.0460981	0.214705	-1.06087	0.131357	4	0.04747	0.217876	-2.01394	-0.8938	5	0.0557776	0.236173	-1.81539	-0.503943	4	-0.518366	-0.622583	-0.386855
0.0813763	0.246603	0.118396	0.401825	NaN	NaN	-1.02196	-0.953368	-0.181086	-0.295495			-	-								0.000467056	111.06	186800000	1	110.76	0.19426	0.0371413	0.192721	-1.51736	-0.526553	5	0.0460982	0.214705	-1.54948	-0.357252	4	0.04747	0.217876	-0.741155	0.378982	5	0.0557778	0.236173	-0.951217	0.360228	4	-1.02935	-1.29939	-0.72542
0.0804597	0.220792	-0.270073	0.284451	NaN	NaN	-0.511374	-0.527069	-0.496183	-0.200931			-	-								1.2e-09	141.34	352170000	1	141.34	0.20016	0.0371413	0.192721	-1.00678	-0.0159694	5	0.0374333	0.193477	-1.02442	-0.0297212	5	0.04747	0.217876	-1.05625	0.0638857	5	0.0451113	0.212394	-0.746907	0.345046	5	-0.569475	-0.339891	-0.638386
0.0773873	0.140822	0.35246	0.614466	NaN	NaN	-0.671113	-0.590883	-0.508913	-0.841112			-					-				4.06e-13	159.22	52089000	1	159.22	-1.7266	0.0371413	0.192721	-1.16652	-0.175709	5	0.0460982	0.214705	-1.187	0.00523314	4	0.04747	0.217876	-1.06898	0.0511552	5	0.0557778	0.236173	-1.49683	-0.18539	4	-0.602622	-0.958114	-0.736463
0.0768216	0.218995	-0.0472392	0.10628	NaN	NaN	-1.20442	-1.20896	-1.3593	-1.27171			-	-			-	-				6.19e-185	364.58	1671000000	1	364.58	0.52187	0.0371413	0.192721	-1.69982	-0.709011	5	0.0374333	0.193477	-1.70631	-0.711614	5	0.04747	0.217876	-1.91937	-0.799229	5	0.0451113	0.212394	-1.81769	-0.725733	5	-1.02292	-1.15121	-1.08108
0.0766894	1.39474	0.118816	0.518998	NaN	NaN	-0.84723	-0.855635	-1.30801	-1.3796			-	-			-	-				1.84e-158	353.92	1170400000	1	353.92	0.27078	0.0371413	0.192721	-1.34263	-0.351825	5	0.0374333	0.193477	-1.35298	-0.358287	5	0.04747	0.217876	-1.86807	-0.747937	5	0.0451113	0.212394	-1.92558	-0.833626	5	-0.780837	-0.753852	-0.822739
0.0756205	0.0463294	0.465516	0.198258	NaN	NaN	-0.61075	-0.620787	-0.952731	-1.35826			-	-			-	-				2.58e-06	109.95	1025000000	1	78.964	-0.94895	0.0371413	0.192721	-1.10615	-0.115345	5	0.0374333	0.193477	-1.11814	-0.123439	5	0.04747	0.217876	-1.5128	-0.392662	5	0.0451113	0.212394	-1.90424	-0.812287	5	0.0225524	-0.18294	-2.08609
0.0721992	0.299746	-0.0560955	0.727636	NaN	NaN	-0.842386	-0.846623	-1.61264	-1.51496			-	-			-	-				5e-39	236.83	76652000000	1	155.57	-0.30464	0.0371413	0.192721	-1.33779	-0.346981	5	0.0374333	0.193477	-1.34397	-0.349275	5	0.04747	0.217876	-2.17271	-1.05257	5	0.0451113	0.212394	-2.06094	-0.968984	5	-0.616513	-0.785447	-0.850551
0.0693053	0.233326	0.167694	0.913269	NaN	NaN	-0.590977	-0.595297	-0.268195	-0.393187			-	-								1.46e-261	419.37	915590000	1	394.12	1.3602	0.0371413	0.192721	-1.08638	-0.0955724	5	0.0374333	0.193477	-1.09264	-0.0979488	5	0.04747	0.217876	-0.828263	0.291874	5	0.0451113	0.212394	-0.939163	0.15279	5	-0.636557	-0.345567	-0.732217
0.06894	0.0516683	-0.086904	0.0717073	NaN	NaN	-1.08611	-1.1016	-0.0537542	0.0667765			-	-								9.34e-49	232.37	401500000	1	232.37	0.21326	0.0458584	0.214146	-1.68067	-0.491543	4	0.0374333	0.193477	-1.59895	-0.604255	5	0.058782	0.24245	-0.726903	0.619395	4	0.0451113	0.212394	-0.4792	0.612753	5	-1.42515	0.260106	NaN
0.0688023	0.234757	-0.138756	0.559215	NaN	NaN	-0.906597	-0.906925	-1.69937	-1.52206			-	-			-	-				9.18e-46	241.22	415430000	1	236.75	0.097734	0.0371413	0.192721	-1.402	-0.411193	5	0.0374333	0.193477	-1.40427	-0.409577	5	0.04747	0.217876	-2.25944	-1.1393	5	0.0451113	0.212394	-2.06804	-0.976088	5	-0.594327	-0.834709	-0.98749
0.0622502	0.213628	-0.242223	0.361548	NaN	NaN	-0.596415	-0.594041	-0.715735	-0.445723			-	-			-					0.000156453	139.88	1336900000	1	137.9	0.31529	0.0371413	0.192721	-1.09182	-0.101011	5	0.0374333	0.193477	-1.09139	-0.0966935	5	0.04747	0.217876	-1.2758	-0.155666	5	0.0451113	0.212394	-0.9917	0.100253	5	-0.531176	-0.429661	-0.461471
0.0617985	0.205658	-0.100627	0.403196	NaN	NaN	-0.73507	-0.730725	-1.47801	-1.3386			-	-			-	-				8.88e-11	175.54	15010000000	1	164.85	-0.13295	0.0371413	0.192721	-1.23047	-0.239665	5	0.0374333	0.193477	-1.22807	-0.233377	5	0.04747	0.217876	-2.03808	-0.917946	5	0.0451113	0.212394	-1.88457	-0.792619	5	-0.253669	-0.840297	-0.766886
0.0617803	0.175746	0.336597	0.537311	NaN	NaN	-1.91749	-1.89994	-3.02103	-3.42142			-	-			-	-				0	501.64	510820000	1	89.6	0.30891	0.0371413	0.192721	-2.41289	-1.42208	5	0.0374333	0.193477	-2.39729	-1.40259	5	0.04747	0.217876	-3.5811	-2.46097	5	0.0557778	0.236173	-4.07714	-2.7657	4	-2.07483	-2.07184	-1.81061
0.0594655	0.129106	-0.15298	0.272539	NaN	NaN	-0.617845	-0.612613	-2.6179	-2.42112			-	-			-	-				1.39e-291	448.68	5067600000	1	394.4	-0.011286	0.0371413	0.192721	-1.11325	-0.12244	5	0.0374333	0.193477	-1.10996	-0.115265	5	0.04747	0.217876	-3.17797	-2.05783	5	0.0451113	0.212394	-2.96709	-1.87514	5	-0.837685	-0.588547	-0.773835
0.0577751	0.221117	-0.0606785	0.473002	NaN	NaN	-0.500195	-0.494686	-0.408016	-0.313644			-									5.47e-50	234.57	716160000	1	132.64	-0.036578	0.0371413	0.192721	-0.995599	-0.00479059	5	0.0374333	0.193477	-0.992034	0.00266183	5	0.04747	0.217876	-0.968085	0.152052	5	0.0451113	0.212394	-0.85962	0.232333	5	-0.34927	-0.495686	-0.395833
0.0570107	0.205517	0.0402372	0.169513	NaN	NaN	-0.857569	-0.847357	-0.792987	-0.792698			-	-			-	-				0.000184745	109.66	804800000	1	109.66	0.35282	0.0371413	0.192721	-1.35297	-0.362165	5	0.0374333	0.193477	-1.3447	-0.350009	5	0.04747	0.217876	-1.35306	-0.232919	5	0.0451113	0.212394	-1.33867	-0.246722	5	-0.722611	-0.857943	-0.654091
0.0562226	0.1762	0.137054	1.31568	NaN	NaN	-1.41746	-1.40026	-1.53945	-1.62702			-	-			-	-				3.63e-38	220.46	26112000000	1	85.937	0.85866	0.0371413	0.192721	-1.91286	-0.922053	5	0.0374333	0.193477	-1.89761	-0.902912	5	0.04747	0.217876	-2.09952	-0.979385	5	0.0451113	0.212394	-2.173	-1.08104	5	-1.37455	-1.53527	-0.987385
0.0560919	0.175444	-0.132428	0.507607	NaN	NaN	-0.838377	-0.827515	-0.866983	-0.701041			-	-			-	-				2.16e-12	190.62	704170000	1	114.89	0.056337	0.0371413	0.192721	-1.33378	-0.342973	5	0.0374333	0.193477	-1.32486	-0.330167	5	0.04747	0.217876	-1.42705	-0.306914	5	0.0451113	0.212394	-1.24702	-0.155065	5	-0.743834	-0.993886	-0.787502
0.0556722	0.130786	0.0391775	0.0757739	NaN	NaN	-1.36427	-1.34715	-1.45282	-1.44731			-	-			-	-				3.24e-36	215.51	1138500000	1	67.415	0.82969	0.0371413	0.192721	-1.85968	-0.868868	5	0.0374333	0.193477	-1.8445	-0.849803	5	0.04747	0.217876	-2.01289	-0.892752	5	0.0451113	0.212394	-1.99328	-0.901329	5	-0.976776	-1.24781	-1.59271
0.0555607	0.133391	-0.167306	1.32544	NaN	NaN	-2.44794	-2.41863	-2.48927	-2.27961			-	-			-	-				6.34e-136	323.39	14235000000	1	185.67	0.70973	0.0371413	0.192721	-2.94334	-1.95253	5	0.0374333	0.193477	-2.91598	-1.92128	5	0.04747	0.217876	-3.04934	-1.9292	5	0.0451113	0.212394	-2.82558	-1.73363	5	-2.22031	-2.51074	-2.25554
0.0552978	0.0536374	-0.203836	0.13058	NaN	NaN	-2.47668	-2.4468	-2.50964	-2.2649			-	-			-	-				3.97e-07	138.99	2439500000	1	69.613	0.061874	0.0371413	0.192721	-2.97208	-1.98127	5	0.0374333	0.193477	-2.94415	-1.94945	5	0.04747	0.217876	-3.06971	-1.94957	5	0.0451113	0.212394	-2.81088	-1.71893	5	-2.19532	-2.13549	-2.69254
0.0535563	0.16708	-0.0386832	0.536288	NaN	NaN	-0.810707	-0.797769	-1.17353	-1.09531			-	-			-	-				2.98e-130	334.4	29068000000	1	251.98	0.35652	0.0371413	0.192721	-1.30611	-0.315303	5	0.0374333	0.193477	-1.29512	-0.300421	5	0.04747	0.217876	-1.7336	-0.613458	5	0.0451113	0.212394	-1.64129	-0.549333	5	-0.827768	-0.727973	-0.756817
0.0533167	0.223451	-0.353066	1.55139	NaN	NaN	-0.54978	-0.539527	-1.13848	-0.75973			-	-			-	-				3.23e-66	257.83	700820000	1	215.51	0.79572	0.0371413	0.192721	-1.04518	-0.0543759	5	0.0374333	0.193477	-1.03687	-0.0421786	5	0.04747	0.217876	-1.69854	-0.578408	5	0.0451113	0.212394	-1.30571	-0.213753	5	-0.788712	-0.435758	-0.369621
0.0524647	0.110714	-0.113707	0.317998	NaN	NaN	-0.811221	-0.726657	-0.465489	-0.340218			-	-								0.00121837	86.898	428690000	1	86.898	-0.094451	0.0371413	0.192721	-1.30663	-0.315817	5	0.0460981	0.214705	-1.32277	-0.130541	4	0.04747	0.217876	-1.02556	0.0945794	5	0.0557777	0.236173	-0.995939	0.315503	4	-0.542431	-1.2747	-0.542853
0.0523572	0.160708	0.406332	1.67532	NaN	NaN	-0.68714	-0.674452	-0.537773	-0.889337			-	-				-				2.17e-37	227.92	7911300000	1	166.79	0.78774	0.0371413	0.192721	-1.18254	-0.191735	5	0.0374333	0.193477	-1.1718	-0.177104	5	0.04747	0.217876	-1.09784	0.0222956	5	0.0451113	0.212394	-1.43531	-0.343361	5	-0.574798	-0.981309	-0.707136
0.0494894	0.222009	-0.267174	1.48178	NaN	NaN	-0.922296	-0.904289	-1.37647	-1.07837			-	-			-	-				3.91e-23	193.81	6990800000	1	173.59	-0.16803	0.0371413	0.192721	-1.4177	-0.426891	5	0.0374333	0.193477	-1.40164	-0.406941	5	0.04747	0.217876	-1.93654	-0.816404	5	0.0451113	0.212394	-1.62435	-0.532398	5	-1.0574	-0.947509	-0.705822
0.0489965	0.150633	-0.234265	0.357757	NaN	NaN	-0.503545	-0.489745	-0.0099519	0.247941			-									7.01e-10	165.18	2783200000	1	129.88	-0.14197	0.0371413	0.192721	-0.99895	-0.00814094	5	0.0374333	0.193477	-0.987093	0.00760279	5	0.04747	0.217876	-0.57002	0.550117	5	0.0451113	0.212394	-0.298035	0.793918	5	-0.139554	-0.50905	-0.273012
0.0489292	0.133202	0.87028	5.66549	NaN	NaN	-1.93666	-1.90681	-0.938285	-1.73113			-	-		+	-	-				2.53e-09	140.03	731850000	1	128.95	0.52965	0.0371413	0.192721	-2.43206	-1.44125	5	0.0374333	0.193477	-2.40416	-1.40947	5	0.04747	0.217876	-1.49835	-0.378217	5	0.0451113	0.212394	-2.2771	-1.18515	5	-2.00778	-1.92421	-1.80295
0.0477415	0.0311862	0.28795	0.569531	NaN	NaN	-0.50075	-0.485801	-0.86947	-1.10567			-				-	-				4.17e-46	211.14	466790000	1	186.27	0.20122	0.0371413	0.192721	-0.996154	-0.00534581	5	0.0374333	0.193477	-0.983149	0.0115468	5	0.04747	0.217876	-1.42954	-0.309401	5	0.0451113	0.212394	-1.65164	-0.55969	5	-0.327617	-0.838995	0.0957812
0.0469097	0.101329	0.319824	0.790726	NaN	NaN	-0.688774	-0.670946	-0.211081	-0.481972			-	-								1.92e-61	260.83	360810000	1	260.83	1.7061	0.0371413	0.192721	-1.18418	-0.19337	5	0.0374333	0.193477	-1.16829	-0.173599	5	0.04747	0.217876	-0.771149	0.348987	5	0.0451113	0.212394	-1.02795	0.0640042	5	-0.741563	-0.845912	-0.189532
0.0458188	0.168305	0.187493	0.548693	NaN	NaN	-0.525839	-0.522128	-0.623275	-0.599753			-				-					6.2e-05	98.898	124680000	1	86.276	-1.1434	0.0371413	0.192721	-1.02124	-0.0304343	5	0.0460982	0.214705	-1.11824	0.0739891	4	0.04747	0.217876	-1.18334	-0.0632067	5	0.0557778	0.236173	-1.25547	0.0559693	4	-0.581461	-0.46198	-0.543019
0.0423702	0.0542991	0.0510376	0.0557334	NaN	NaN	-1.57921	-1.54719	-2.52527	-2.52426			-	-			-	-				1.03e-20	183.96	933790000	1	173.06	-0.42488	0.0371413	0.192721	-2.07462	-1.08381	5	0.0374333	0.193477	-2.04454	-1.04984	5	0.04747	0.217876	-3.08534	-1.96521	5	0.0451113	0.212394	-3.07024	-1.97828	5	-1.44812	-1.83318	-1.39034
0.0413931	0.077794	0.294487	1.54553	NaN	NaN	-0.618912	-0.545358	0.367387	0.110491			-									5.9e-30	157.47	109470000	1	157.47	-0.82094	0.0458584	0.214146	-1.21348	-0.0243482	4	0.0460981	0.214705	-1.14147	0.0507577	4	0.058782	0.24245	-0.305762	1.04054	4	0.0451113	0.212394	-0.435485	0.656468	5	NaN	-0.197861	-0.502811
0.0405216	0.302671	-0.00512252	0.0623162	NaN	NaN	-1.84065	-1.80397	-1.35123	-1.30399			-	-			-	-				2.14e-06	132.25	666480000	1	100.88	-0.40336	0.0371413	0.192721	-2.33606	-1.34525	5	0.0374333	0.193477	-2.30132	-1.30662	5	0.04747	0.217876	-1.9113	-0.791164	5	0.0451113	0.212394	-1.84996	-0.75801	5	-1.73936	-1.8918	-1.87313
0.0393001	0.0788363	-0.0438028	0.0746847	NaN	NaN	-0.939857	-0.912075	-1.48342	-1.39833			-	-			-	-				3.33e-08	155.5	3142500000	1	145.25	0.28586	0.0371413	0.192721	-1.43526	-0.444452	5	0.0374333	0.193477	-1.40942	-0.414727	5	0.04747	0.217876	-2.04349	-0.923353	5	0.0451113	0.212394	-1.94431	-0.852353	5	-1.11279	-0.949674	-0.753982
0.0387083	0.0664779	-0.212829	0.430395	NaN	NaN	-0.574849	-0.655272	-0.619154	-0.505026			-	-			-					0.00508702	73.931	834470000	1	60.973	-0.33721	0.0371413	0.192721	-1.07025	-0.0794443	5	0.0460981	0.214705	-1.25139	-0.0591564	4	0.04747	0.217876	-1.17922	-0.0590852	5	0.0557776	0.236173	-1.16075	0.150696	4	-0.479657	-0.329218	-0.777916
0.0356633	0.158822	0.114644	1.10173	NaN	NaN	-1.49136	-1.45401	-1.89276	-1.95663			-	-			-	-				0.000511656	121.64	2213300000	1	121.64	0.27305	0.0371413	0.192721	-1.98676	-0.995954	5	0.0374333	0.193477	-1.95135	-0.956659	5	0.04747	0.217876	-2.45283	-1.33269	5	0.0451113	0.212394	-2.50261	-1.41066	5	-1.36472	-1.62457	-1.4047
0.0353101	0.0892418	-0.0242956	0.0653107	NaN	NaN	-0.517631	-0.490806	-0.778541	-0.716609			-				-	-				2.92e-38	222.42	980660000	1	176.25	0.47623	0.0371413	0.192721	-1.01304	-0.0222269	5	0.0374333	0.193477	-0.988154	0.0065424	5	0.04747	0.217876	-1.33861	-0.218472	5	0.0451113	0.212394	-1.26259	-0.170632	5	-0.394548	-0.397812	-0.373123
0.0347634	0.0787865	-0.0663108	0.197659	NaN	NaN	-1.53279	-1.49414	-1.74217	-1.6339			-	-			-	-				1.36e-90	293.31	900990000	1	293.31	0.40495	0.0371413	0.192721	-2.0282	-1.03739	5	0.0374333	0.193477	-1.99148	-0.996787	5	0.04747	0.217876	-2.30224	-1.1821	5	0.0451113	0.212394	-2.17987	-1.08792	5	-1.27528	-1.69135	-1.7128
0.034044	0.0931255	-0.103795	0.334404	NaN	NaN	-1.06853	-1.03437	-1.45339	-1.3111			-	-			-	-				5.48e-30	185.27	485800000	1	184.26	1.4793	0.0371413	0.192721	-1.56393	-0.573124	5	0.0374333	0.193477	-1.53172	-0.537022	5	0.04747	0.217876	-2.01346	-0.893324	5	0.0451113	0.212394	-1.85708	-0.765124	5	-1.14377	-1.19474	-0.800864
0.0336243	0.0677757	-0.314138	0.453272	NaN	NaN	-0.850038	-0.81792	-0.732473	-0.393558			-	-			-					1.91e-68	283.42	6809800000	1	205.52	-0.17979	0.0371413	0.192721	-1.34544	-0.354633	5	0.0374333	0.193477	-1.31527	-0.320572	5	0.04747	0.217876	-1.29254	-0.172404	5	0.0451113	0.212394	-0.939534	0.152419	5	-0.450943	-0.871287	-0.687895
0.0330349	0.141931	-0.10654	0.723242	NaN	NaN	-0.859416	-0.82664	-1.7681	-1.62118			-	-			-	-				1.48e-181	369.71	5282700000	1	197.88	0.16183	0.0371413	0.192721	-1.35482	-0.364012	5	0.0374333	0.193477	-1.32399	-0.329292	5	0.04747	0.217876	-2.32817	-1.20803	5	0.0451113	0.212394	-2.16715	-1.0752	5	-0.760005	-0.63594	-0.95454
0.0322893	0.480045	0.00444467	0.0277704	NaN	NaN	-1.00609	-0.970976	-1.28354	-1.24588			-	-			-	-				0	464.61	3433700000	1	360.94	-0.18266	0.0371413	0.192721	-1.50149	-0.510684	5	0.0374333	0.193477	-1.46832	-0.473628	5	0.04747	0.217876	-1.84361	-0.723469	5	0.0451113	0.212394	-1.79185	-0.6999	5	-0.993835	-0.955686	-1.03207
0.0309163	0.076845	0.0023895	0.00626035	NaN	NaN	-0.916951	-0.881542	-0.592701	-0.557484			-	-			-	-				3.72e-24	180.32	1245000000	1	69.72	-0.72312	0.0371413	0.192721	-1.41236	-0.421547	5	0.0374333	0.193477	-1.37889	-0.384194	5	0.04747	0.217876	-1.15277	-0.0326329	5	0.0451113	0.212394	-1.10346	-0.0115073	5	-0.737505	-1.0394	-0.80401
0.0306602	0.18371	0.293364	2.69596	NaN	NaN	-1.33037	-1.29011	-1.01804	-1.25847			-	-			-	-				3.73e-14	164.66	4962600000	1	148.71	0.1774	0.0371413	0.192721	-1.82578	-0.834967	5	0.0374333	0.193477	-1.78746	-0.792763	5	0.04747	0.217876	-1.57811	-0.457972	5	0.0451113	0.212394	-1.80444	-0.712492	5	-1.44327	-1.38271	-1.18245
0.0303219	0.0555748	0.23957	2.27921	NaN	NaN	-1.64359	-1.59952	-1.26161	-1.44902			-	-			-	-				1.74e-05	126.31	760620000	1	125.57	0.20436	0.0371413	0.192721	-2.139	-1.14819	5	0.0374333	0.193477	-2.09687	-1.10217	5	0.04747	0.217876	-1.82168	-0.701544	5	0.0451113	0.212394	-1.995	-0.903048	5	-1.57273	-1.71011	-1.91056
0.0300492	0.0216556	-0.318441	0.425335	NaN	NaN	-0.542757	-0.510705	-0.424097	-0.0830334			-	-								1.32e-44	230.23	568020000	1	230.23	-0.50206	0.0371413	0.192721	-1.03816	-0.0473527	5	0.0374333	0.193477	-1.00805	-0.0133567	5	0.04747	0.217876	-0.984165	0.135972	5	0.0451113	0.212394	-0.62901	0.462943	5	-0.877417	0.242601	-1.19684
0.0296537	0.0760497	-0.0612483	0.197211	NaN	NaN	-0.527328	-0.495076	-0.839355	-0.741684			-				-	-				1.28e-268	408.93	487280000	1	408.93	0.1765	0.0371413	0.192721	-1.02273	-0.031924	5	0.0374333	0.193477	-0.992424	0.00227173	5	0.04747	0.217876	-1.39942	-0.279287	5	0.0451113	0.212394	-1.28766	-0.195708	5	-0.603476	-0.495254	-0.51011
0.0220051	0.0907473	-0.134426	0.585795	NaN	NaN	-0.790884	-0.748501	-1.41975	-1.24837			-	-			-	-				1.79e-28	196.8	5207900000	1	73.245	-0.32578	0.0371413	0.192721	-1.28629	-0.295479	5	0.0374333	0.193477	-1.24585	-0.251153	5	0.04747	0.217876	-1.97982	-0.859686	5	0.0451113	0.212394	-1.79435	-0.702397	5	-0.837594	-0.723789	-0.625464
0.0218371	0.0470333	-0.0863251	0.234946	NaN	NaN	-2.16098	-2.10316	-2.41965	-2.28791			-	-			-	-				3.79e-95	293.22	581190000	1	292.6	0.32585	0.0371413	0.192721	-2.65638	-1.66557	5	0.0374333	0.193477	-2.60051	-1.60581	5	0.04747	0.217876	-2.97972	-1.85959	5	0.0451113	0.212394	-2.83388	-1.74193	5	-2.05629	-1.94734	-2.16766
0.0214245	0.218497	0.0271737	0.145558	NaN	NaN	-1.17912	-1.13186	-1.67761	-1.65917			-	-			-	-				2.49e-233	406.96	4490900000	1	274.08	0.20066	0.0371413	0.192721	-1.67453	-0.683717	5	0.0374333	0.193477	-1.62921	-0.634515	5	0.04747	0.217876	-2.23767	-1.11754	5	0.0451113	0.212394	-2.20515	-1.1132	5	-1.14648	-1.20388	-1.11828
0.0213836	0.047638	0.0677712	0.29451	NaN	NaN	-0.530107	-0.490048	-0.567901	-0.595389			-				-	-				2.34e-167	353	7572100000	1	230.29	-0.79391	0.0371413	0.192721	-1.02551	-0.0347028	5	0.0374333	0.193477	-0.987396	0.00729991	5	0.04747	0.217876	-1.12797	-0.00783244	5	0.0451113	0.212394	-1.14137	-0.0494125	5	-0.538301	-0.478452	-0.293274
0.0208374	0.0719625	2.45286	2.01681	NaN	NaN	-1.39818	-1.34793	1.26025	-1.0606			-	-	++	+	+	-				2.04e-28	208.79	849080000	1	201.65	-0.87938	0.0371413	0.192721	-1.89359	-0.902777	5	0.0374333	0.193477	-1.84528	-0.850581	5	0.04747	0.217876	0.700182	1.82032	5	0.0451113	0.212394	-1.60658	-0.514624	5	-1.26325	-1.22546	-1.53697
0.0197815	0.0457231	0.010736	0.0346294	NaN	NaN	-0.546119	-0.504375	-0.660605	-0.632939			-	-			-	-				2.46e-175	388.46	15478000000	1	322.02	-0.049538	0.0371413	0.192721	-1.04152	-0.0507144	5	0.0374333	0.193477	-1.00172	-0.0070269	5	0.04747	0.217876	-1.22067	-0.100536	5	0.0451113	0.212394	-1.17892	-0.0869622	5	-0.620387	-0.522073	-0.276558
0.0190242	0.0613457	-0.218366	0.381666	NaN	NaN	-1.12847	-1.07952	-2.17718	-1.92066			-	-			-	-				4.72e-38	212.39	286090000	1	100.58	-0.22701	0.0371413	0.192721	-1.62387	-0.633062	5	0.0374333	0.193477	-1.57686	-0.582169	5	0.04747	0.217876	-2.73724	-1.61711	5	0.0451113	0.212394	-2.46664	-1.37468	5	-1.13218	-0.975511	-1.06411
0.0189083	0.0301885	0.440868	1.19119	NaN	NaN	-0.809674	-0.703008	-0.913222	-1.27162			-	-			-	-				2.34e-100	286.93	513340000	1	286.93	2.5428	0.0599259	0.244798	-1.58873	-0.0306184	3	0.0460981	0.214705	-1.29912	-0.106892	4	0.0771789	0.277811	-1.79734	-0.0291036	3	0.0557777	0.236173	-1.92734	-0.615895	4	-0.364041	-0.842693	NaN
0.0186456	0.0575339	-0.173281	0.411907	NaN	NaN	-0.498241	-0.455963	-0.482782	-0.280211			-									1.58e-242	400.89	681630000	1	400.89	0.61304	0.0371413	0.192721	-0.993645	-0.00283626	5	0.0374333	0.193477	-0.953311	0.0413854	5	0.04747	0.217876	-1.04285	0.0772869	5	0.0451113	0.212394	-0.826188	0.265765	5	-0.400323	-0.431011	-0.504679
0.0160031	0.017252	0.0243177	0.0365609	NaN	NaN	-0.587788	-0.542027	-1.02341	-1.00789			-	-			-	-				2.27e-55	256.96	413550000	1	256.96	0.34322	0.0371413	0.192721	-1.08319	-0.0923839	5	0.0374333	0.193477	-1.03937	-0.0446791	5	0.0587819	0.24245	-1.69656	-0.35026	4	0.0451113	0.212394	-1.55387	-0.461917	5	-0.55578	0.412512	-0.584875
0.0152673	0.0254804	0.109331	0.295951	NaN	NaN	-0.868037	-0.818459	-0.68684	-0.753326			-	-			-	-				4.64e-38	211.45	210570000	1	192.46	-1.4523	0.0371413	0.192721	-1.36344	-0.372632	5	0.0374333	0.193477	-1.31581	-0.321111	5	0.04747	0.217876	-1.24691	-0.126771	5	0.0451113	0.212394	-1.2993	-0.20735	5	-0.537599	-1.02126	-0.617733
0.0148268	0.0539044	0.0597817	0.330658	NaN	NaN	-0.844834	-0.795101	-1.01546	-1.03244			-	-			-	-				8.71e-63	259.68	13051000000	1	259.68	-0.4777	0.0371413	0.192721	-1.34024	-0.34943	5	0.0374333	0.193477	-1.29245	-0.297753	5	0.04747	0.217876	-1.57552	-0.455387	5	0.0451113	0.212394	-1.57842	-0.486467	5	-0.647949	-0.830751	-0.779795
[truncated: 19,972 more rows]
[truncated: 37 more columns]

## Sheet: Supplementary File 2B
Supplementary File 2B: Quantified phosphosites as shown in Table S4A without imputation of missing values. Phosphosites were filtered on a localization probability >0.75 and normalized to protein abundance. Column A and C list the t-test differences between samples treated or not for 5 min and 15 min with Glc starvation and the inhibitor 2NM-PP1 (Glc starvation-2NM-PP1), respectively. Columns B a…
[truncated: 21,224 more rows]
[truncated: 23 more columns]

[truncated: 4 more sheets: Supplementary File 2C, Supplementary File 2SupplementD, Supplementary File 2E, Supplementary File 2F]
